# Supplementary material
Source: MDPI journal article supplement (https://www.mdpi.com/2073-4352/7/1/7)
Supplement: s1 [file s1]

# Supplementary Materials: Reversible Single-Crystal-to-Single-Crystal Phase Transition of Chiral Salicylidenephenylethylamine

Akifumi Takanabe, Takuro Katsufuji, Kohei Johmoto, Hidehiro Uekusa, Motoo Shiro, Hideko Koshima and Toru Asahi

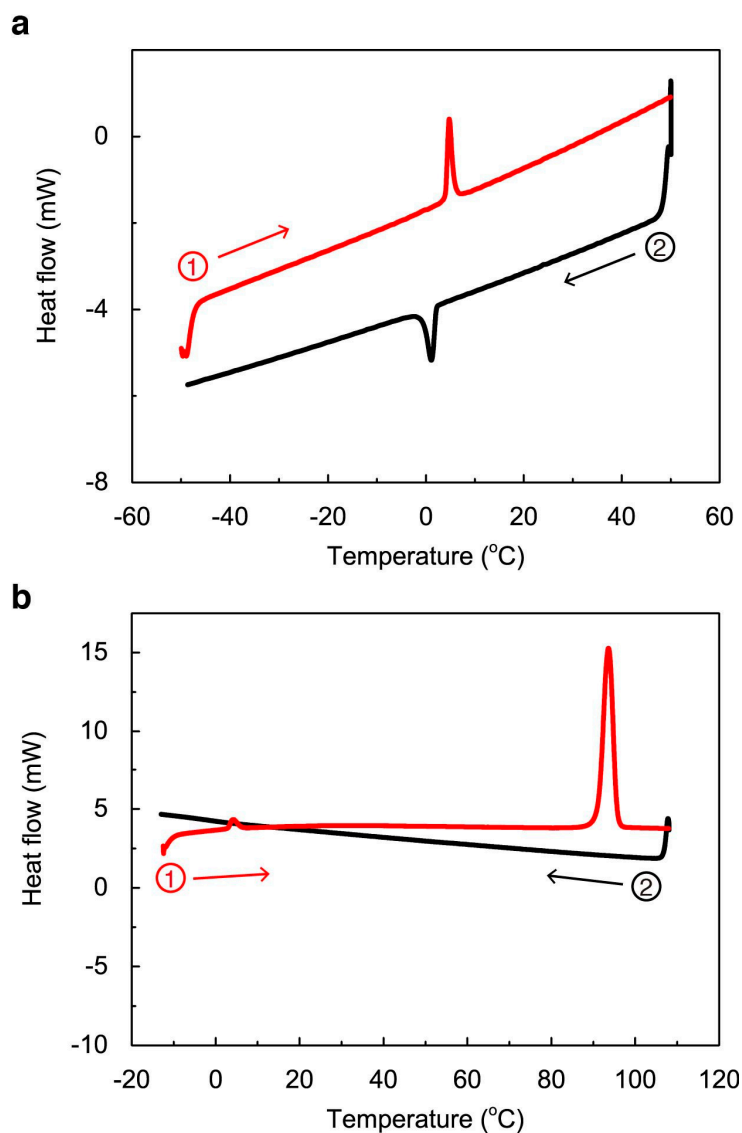

**Figure S1.** DSC curves of the enol-(S)-1 crystal over the temperature range from (a) -50 to +50 °C and (b) -10 to +110 °C on initial heating and then cooling.

- DSC runs of the enol-(S)-1 crystals (6.58 mg) were recorded using a DSC8500 (PerkinElmer, Norwalk, CT, USA) over the temperature range from -50 °C to 50 °C with a rate of 10 °C·min<sup>-1</sup> on initial heating and then cooling.
- DSC runs of the enol-(S)-1 crystals (3.10 mg) were recorded using a DSC8500 (PerkinElmer) over the temperature range from -10 °C to 110 °C with a rate of 10 °C·min<sup>-1</sup> on initial heating and then cooling. On heating, the small phase transition peak and the large melting peak appeared at around 3 and 93 °C. However, any exothermic and endothermic peaks were not observed on cooling because all the enol-(S)-1 compound moved to the upper lid of DSC sample pan by va-porization after melting.

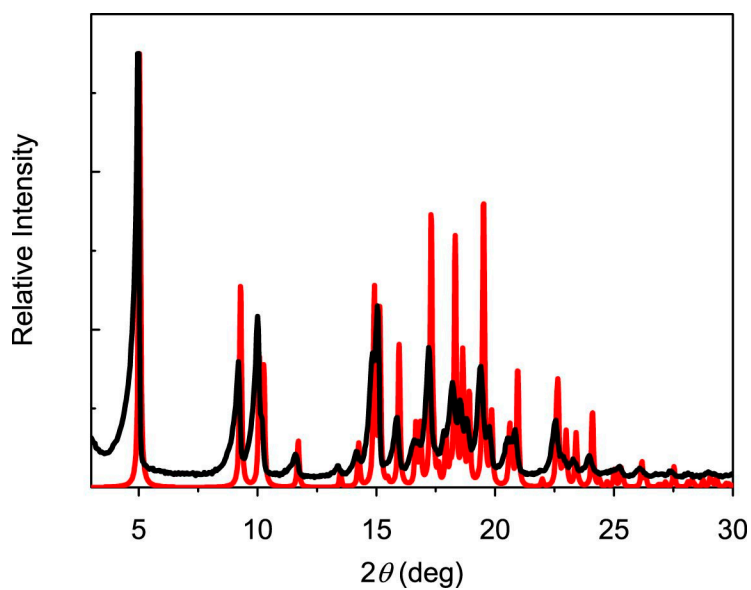

**Figure S2.** X-ray diffraction (XRD) patterns of the enol-(S)-1 crystal: powder XRD pattern measured at room temperature (black line) and calculated XRD pattern from the single crystal structure of the  $\alpha$ -form (red line).

The powder XRD pattern was measured at room temperature using a Rint-Ultima III diffractometer (Rigaku, Tokyo, Japan) operating at 40 kV and 40 mA with Cu-K $\alpha$  radiation ( $2\theta$  range 3°–30°; step size 0.04°).
