# Supplementary material
Source: MDPI journal article supplement (https://www.mdpi.com/2073-4352/7/1/7)
Supplement: s1 [file s1]

Archive with 3 entries (3 files):
- alpha.cif
- beta.cif
- crystals-168050-supplementary_rev1.pdf
