# Supplementary material
Source: MDPI journal article supplement (https://www.mdpi.com/2073-4352/7/1/7)
Supplement: s1 [file s1 › alpha.cif]

 
data_dd
 
_audit_creation_method            'SHELXL-2016/6'
_shelx_SHELXL_version_number      '2016/6'
_chemical_name_systematic         ?
_chemical_name_common             ?
_chemical_melting_point           ?
_chemical_formula_moiety          ?
_chemical_formula_sum
 'C23 H31 N O' 
_chemical_formula_weight          337.49

loop_
 _atom_type_symbol
 _atom_type_description
 _atom_type_scat_dispersion_real
 _atom_type_scat_dispersion_imag
 _atom_type_scat_source
 'C'  'C'   0.0181   0.0091
 'International Tables Vol C Tables 4.2.6.8 and 6.1.1.4'
 'H'  'H'   0.0000   0.0000
 'International Tables Vol C Tables 4.2.6.8 and 6.1.1.4'
 'N'  'N'   0.0311   0.0180
 'International Tables Vol C Tables 4.2.6.8 and 6.1.1.4'
 'O'  'O'   0.0492   0.0322
 'International Tables Vol C Tables 4.2.6.8 and 6.1.1.4'
 
_space_group_crystal_system       orthorhombic
_space_group_IT_number            19
_space_group_name_H-M_alt         'P 21 21 21'
_space_group_name_Hall            'P 2ac 2ab'
 
_shelx_space_group_comment
;
The symmetry employed for this shelxl refinement is uniquely defined
by the following loop, which should always be used as a source of
symmetry information in preference to the above space-group names.
They are only intended as comments.
;
 
loop_
 _space_group_symop_operation_xyz
 'x, y, z'
 '-x+1/2, -y, z+1/2'
 '-x, y+1/2, -z+1/2'
 'x+1/2, -y+1/2, -z'
 
_cell_length_a                    6.3058(4)
_cell_length_b                    35.071(2)
_cell_length_c                    9.8851(6)
_cell_angle_alpha                 90
_cell_angle_beta                  90
_cell_angle_gamma                 90
_cell_volume                      2186.1(2)
_cell_formula_units_Z             4
_cell_measurement_temperature     293(2)
_cell_measurement_reflns_used     14165
_cell_measurement_theta_min       3.78
_cell_measurement_theta_max       68.14
 
_exptl_crystal_description        block
_exptl_crystal_colour             yellow
_exptl_crystal_density_meas       ?
_exptl_crystal_density_method     ?
_exptl_crystal_density_diffrn     1.025          
_exptl_crystal_F_000              736
_exptl_transmission_factor_min    ?
_exptl_transmission_factor_max    ?
_exptl_crystal_size_max           0.500
_exptl_crystal_size_mid           0.500
_exptl_crystal_size_min           0.100
_exptl_absorpt_coefficient_mu     0.469
_shelx_estimated_absorpt_T_min    ?
_shelx_estimated_absorpt_T_max    ?
_exptl_absorpt_correction_type    multi-scan
_exptl_absorpt_correction_T_min   0.712
_exptl_absorpt_correction_T_max   0.954
_exptl_absorpt_process_details    'ABSCOR (Rigaku, 1995)'
_exptl_absorpt_special_details    ?
_diffrn_ambient_temperature       293(2)
_diffrn_radiation_wavelength      1.54187
_diffrn_radiation_type            CuK\a
_diffrn_source                    ?
_diffrn_measurement_device_type   'Rigaku R-AXIS RAPID'
_diffrn_measurement_method        ?
_diffrn_detector_area_resol_mean  ?
_diffrn_reflns_number             34535
_diffrn_reflns_av_unetI/netI      0.0499
_diffrn_reflns_av_R_equivalents   0.0813
_diffrn_reflns_limit_h_min        -7
_diffrn_reflns_limit_h_max        7
_diffrn_reflns_limit_k_min        -41
_diffrn_reflns_limit_k_max        42
_diffrn_reflns_limit_l_min        -11
_diffrn_reflns_limit_l_max        11
_diffrn_reflns_theta_min          4.648
_diffrn_reflns_theta_max          68.136
_diffrn_reflns_theta_full         67.687
_diffrn_measured_fraction_theta_max   0.999
_diffrn_measured_fraction_theta_full  1.000
_diffrn_reflns_Laue_measured_fraction_max    0.999
_diffrn_reflns_Laue_measured_fraction_full   1.000
_diffrn_reflns_point_group_measured_fraction_max   0.998
_diffrn_reflns_point_group_measured_fraction_full  0.999
_reflns_number_total              3986
_reflns_number_gt                 2108
_reflns_threshold_expression      'I > 2\s(I)'
_reflns_Friedel_coverage          0.707
_reflns_Friedel_fraction_max      0.998
_reflns_Friedel_fraction_full     0.999
 
_reflns_special_details
;
 Reflections were merged by SHELXL according to the crystal
 class for the calculation of statistics and refinement.
 
 _reflns_Friedel_fraction is defined as the number of unique
 Friedel pairs measured divided by the number that would be
 possible theoretically, ignoring centric projections and
 systematic absences.
;
 
_computing_data_collection        ?
_computing_cell_refinement        ?
_computing_data_reduction         ?
_computing_structure_solution     'SHELXT 2014/4 (Sheldrick, 2014)'
_computing_structure_refinement 'SHELXL-2016/6 (Sheldrick, 2016)'
_computing_molecular_graphics     ?
_computing_publication_material   ?
_refine_special_details           ?
_refine_ls_structure_factor_coef  Fsqd
_refine_ls_matrix_type            full
_refine_ls_weighting_scheme       calc
_refine_ls_weighting_details
'w=1/[\s^2^(Fo^2^)+(0.0960P)^2^+0.2493P] where P=(Fo^2^+2Fc^2^)/3'
_atom_sites_solution_primary      ?
_atom_sites_solution_secondary    ?
_atom_sites_solution_hydrogens    mixed
_refine_ls_hydrogen_treatment     mixed
_refine_ls_extinction_method      'SHELXL-2016/6 (Sheldrick 2016)'
_refine_ls_extinction_coef        0.023(2)
_refine_ls_extinction_expression
 'Fc^*^=kFc[1+0.001xFc^2^\l^3^/sin(2\q)]^-1/4^'
_refine_ls_abs_structure_details
;
 Flack x determined using 678 quotients [(I+)-(I-)]/[(I+)+(I-)]
 (Parsons, Flack and Wagner, Acta Cryst. B69 (2013) 249-259).
;
_refine_ls_abs_structure_Flack    -0.11(17)
_chemical_absolute_configuration  'CHOOSE rm ad rmad syn or unk'
_refine_ls_number_reflns          3986
_refine_ls_number_parameters      254
_refine_ls_number_restraints      3
_refine_ls_R_factor_all           0.1257
_refine_ls_R_factor_gt            0.0681
_refine_ls_wR_factor_ref          0.2074
_refine_ls_wR_factor_gt           0.1546
_refine_ls_goodness_of_fit_ref    1.052
_refine_ls_restrained_S_all       1.052
_refine_ls_shift/su_max           0.000
_refine_ls_shift/su_mean          0.000
 
loop_
 _atom_site_label
 _atom_site_type_symbol
 _atom_site_fract_x
 _atom_site_fract_y
 _atom_site_fract_z
 _atom_site_U_iso_or_equiv
 _atom_site_adp_type
 _atom_site_occupancy
 _atom_site_site_symmetry_order  
 _atom_site_calc_flag
 _atom_site_refinement_flags_posn
 _atom_site_refinement_flags_adp
 _atom_site_refinement_flags_occupancy
 _atom_site_disorder_assembly
 _atom_site_disorder_group
O1 O -0.0968(6) 0.12442(10) 0.6048(3) 0.0995(11) Uani 1 1 d . . . . .
N1 N -0.3505(6) 0.18159(10) 0.5676(4) 0.0891(11) Uani 1 1 d . . . . .
C1 C -0.2318(7) 0.14071(12) 0.3873(5) 0.0819(12) Uani 1 1 d . . . . .
H1 H -0.188(13) 0.146(2) 0.612(7) 0.17(3) Uiso 1 1 d . . . . .
C2 C -0.1075(8) 0.11774(12) 0.4701(4) 0.0833(12) Uani 1 1 d . . . . .
C3 C 0.0121(8) 0.08733(12) 0.4125(5) 0.0912(13) Uani 1 1 d . . . . .
C4 C -0.0087(10) 0.08193(13) 0.2747(5) 0.0966(15) Uani 1 1 d . . . . .
H4 H 0.067904 0.062094 0.235781 0.116 Uiso 1 1 calc R U . . .
C5 C -0.1356(9) 0.10391(13) 0.1895(4) 0.0895(13) Uani 1 1 d . . . . .
C6 C -0.2453(9) 0.13380(12) 0.2494(5) 0.0898(14) Uani 1 1 d . . . . .
H6 H -0.329542 0.149508 0.196017 0.108 Uiso 1 1 calc R U . . .
C7 C -0.3524(8) 0.17306(12) 0.4433(5) 0.0897(13) Uani 1 1 d . . . . .
H7 H -0.433413 0.187837 0.384729 0.108 Uiso 1 1 calc R U . . .
C8 C -0.3621(7) 0.23976(12) 0.7061(4) 0.0843(12) Uani 1 1 d . . . . .
C9 C -0.3920(9) 0.27875(14) 0.7012(6) 0.1034(16) Uani 1 1 d . . . . .
H9 H -0.480627 0.289087 0.635503 0.124 Uiso 1 1 calc R U . . .
C10 C -0.2932(11) 0.30241(15) 0.7915(6) 0.1134(17) Uani 1 1 d . . . . .
H10 H -0.315505 0.328578 0.786291 0.136 Uiso 1 1 calc R U . . .
C11 C -0.1638(9) 0.28829(18) 0.8882(6) 0.1087(16) Uani 1 1 d . . . . .
H11 H -0.098273 0.304565 0.949594 0.130 Uiso 1 1 calc R U . . .
C12 C -0.1300(9) 0.24977(18) 0.8947(5) 0.1097(16) Uani 1 1 d . . . . .
H12 H -0.040611 0.239788 0.960677 0.132 Uiso 1 1 calc R U . . .
C13 C -0.2281(8) 0.22576(14) 0.8038(5) 0.0971(15) Uani 1 1 d . . . . .
H13 H -0.203206 0.199664 0.808647 0.117 Uiso 1 1 calc R U . . .
C14 C -0.4843(8) 0.21390(13) 0.6116(5) 0.0965(14) Uani 1 1 d . . . . .
H14 H -0.526648 0.228583 0.531675 0.116 Uiso 1 1 calc R U . . .
C15 C -0.6829(9) 0.19835(19) 0.6800(7) 0.140(2) Uani 1 1 d . . . . .
H15A H -0.756322 0.181736 0.618685 0.210 Uiso 1 1 calc R U . . .
H15B H -0.773967 0.219132 0.704832 0.210 Uiso 1 1 calc R U . . .
H15C H -0.643348 0.184378 0.759643 0.210 Uiso 1 1 calc R U . . .
C16 C 0.1480(11) 0.06123(15) 0.5013(5) 0.1152(19) Uani 1 1 d . . . . .
C17 C 0.0050(14) 0.04051(15) 0.6013(7) 0.146(3) Uani 1 1 d . . . . .
H17A H -0.065802 0.058799 0.657660 0.219 Uiso 1 1 calc R U . . .
H17B H 0.089169 0.023848 0.656609 0.219 Uiso 1 1 calc R U . . .
H17C H -0.098337 0.025802 0.552708 0.219 Uiso 1 1 calc R U . . .
C18 C 0.3176(11) 0.08482(19) 0.5789(8) 0.143(2) Uani 1 1 d . . . . .
H18A H 0.248367 0.102898 0.636919 0.214 Uiso 1 1 calc R U . . .
H18B H 0.405698 0.098121 0.515301 0.214 Uiso 1 1 calc R U . . .
H18C H 0.403511 0.067992 0.632446 0.214 Uiso 1 1 calc R U . . .
C19 C 0.2649(17) 0.0313(2) 0.4156(8) 0.194(4) Uani 1 1 d . . . . .
H19A H 0.346769 0.015043 0.473695 0.291 Uiso 1 1 calc R U . . .
H19B H 0.357456 0.043896 0.352758 0.291 Uiso 1 1 calc R U . . .
H19C H 0.163407 0.016231 0.366684 0.291 Uiso 1 1 calc R U . . .
C20 C -0.1469(10) 0.09560(15) 0.0377(5) 0.1072(17) Uani 1 1 d D . . . .
C21A C 0.0729(18) 0.0989(4) -0.0224(9) 0.187(6) Uani 0.783(12) 1 d . . P A 1
H21A H 0.169337 0.083136 0.027885 0.280 Uiso 0.783(12) 1 calc R U P A 1
H21B H 0.119015 0.124931 -0.018303 0.280 Uiso 0.783(12) 1 calc R U P A 1
H21C H 0.069789 0.090622 -0.114989 0.280 Uiso 0.783(12) 1 calc R U P A 1
C22A C -0.235(2) 0.0553(2) 0.0165(9) 0.153(5) Uani 0.783(12) 1 d . . P A 1
H22A H -0.227653 0.048798 -0.077659 0.229 Uiso 0.783(12) 1 calc R U P A 1
H22B H -0.380330 0.054468 0.045873 0.229 Uiso 0.783(12) 1 calc R U P A 1
H22C H -0.153179 0.037423 0.068167 0.229 Uiso 0.783(12) 1 calc R U P A 1
C23A C -0.298(2) 0.1221(3) -0.0383(7) 0.150(5) Uani 0.783(12) 1 d . . P A 1
H23A H -0.246942 0.147844 -0.032614 0.226 Uiso 0.783(12) 1 calc R U P A 1
H23B H -0.436724 0.120622 0.001534 0.226 Uiso 0.783(12) 1 calc R U P A 1
H23C H -0.305605 0.114516 -0.131452 0.226 Uiso 0.783(12) 1 calc R U P A 1
C21B C -0.030(5) 0.1303(7) -0.029(3) 0.115(10) Uiso 0.217(12) 1 d D . P A 2
H21D H -0.024246 0.126725 -0.125555 0.173 Uiso 0.217(12) 1 calc R U P A 2
H21E H 0.111895 0.132036 0.005798 0.173 Uiso 0.217(12) 1 calc R U P A 2
H21F H -0.105188 0.153404 -0.009257 0.173 Uiso 0.217(12) 1 calc R U P A 2
C22B C -0.022(5) 0.0594(7) -0.001(3) 0.104(9) Uiso 0.217(12) 1 d D . P A 2
H22D H -0.073016 0.038272 0.052108 0.156 Uiso 0.217(12) 1 calc R U P A 2
H22E H 0.125720 0.063283 0.017407 0.156 Uiso 0.217(12) 1 calc R U P A 2
H22F H -0.042074 0.054059 -0.094943 0.156 Uiso 0.217(12) 1 calc R U P A 2
C23B C -0.381(4) 0.0926(11) 0.007(4) 0.137(12) Uiso 0.217(12) 1 d D . P A 2
H23E H -0.441751 0.071968 0.057631 0.206 Uiso 0.217(12) 1 calc R U P A 2
H23F H -0.400475 0.087834 -0.088275 0.206 Uiso 0.217(12) 1 calc R U P A 2
H23D H -0.450536 0.115990 0.030688 0.206 Uiso 0.217(12) 1 calc R U P A 2
 
loop_
 _atom_site_aniso_label
 _atom_site_aniso_U_11
 _atom_site_aniso_U_22
 _atom_site_aniso_U_33
 _atom_site_aniso_U_23
 _atom_site_aniso_U_13
 _atom_site_aniso_U_12
O1 0.119(3) 0.103(2) 0.076(2) -0.0081(17) -0.0016(19) 0.016(2)
N1 0.092(3) 0.089(2) 0.086(2) -0.0172(19) 0.008(2) 0.011(2)
C1 0.091(3) 0.081(3) 0.073(3) -0.009(2) 0.009(2) 0.001(2)
C2 0.099(3) 0.078(3) 0.073(3) -0.006(2) 0.007(2) 0.001(2)
C3 0.106(3) 0.080(3) 0.087(3) -0.003(2) 0.007(3) 0.008(3)
C4 0.123(4) 0.081(3) 0.086(3) -0.007(2) 0.013(3) 0.012(3)
C5 0.113(4) 0.083(3) 0.072(3) -0.009(2) 0.010(3) -0.003(3)
C6 0.108(4) 0.081(3) 0.080(3) -0.007(2) 0.006(3) 0.004(3)
C7 0.086(3) 0.092(3) 0.090(3) -0.011(2) 0.005(3) 0.004(2)
C8 0.080(3) 0.093(3) 0.080(3) -0.014(2) 0.004(2) 0.008(2)
C9 0.119(4) 0.087(3) 0.104(4) -0.011(3) 0.001(3) 0.026(3)
C10 0.126(5) 0.091(3) 0.122(4) -0.019(3) 0.006(4) 0.005(3)
C11 0.100(4) 0.119(4) 0.108(4) -0.022(3) 0.008(3) -0.011(3)
C12 0.100(4) 0.138(5) 0.091(3) -0.010(3) -0.008(3) 0.005(3)
C13 0.099(3) 0.099(3) 0.093(3) -0.006(3) -0.004(3) 0.012(3)
C14 0.085(3) 0.104(3) 0.101(3) -0.026(3) -0.003(3) 0.016(3)
C15 0.096(4) 0.158(5) 0.167(5) -0.065(4) 0.031(4) -0.020(4)
C16 0.149(5) 0.092(3) 0.104(4) -0.004(3) 0.003(4) 0.038(4)
C17 0.210(8) 0.105(4) 0.123(5) 0.024(3) -0.021(5) 0.001(5)
C18 0.123(5) 0.149(5) 0.156(5) -0.002(4) -0.021(5) 0.027(4)
C19 0.276(11) 0.159(6) 0.147(5) -0.017(5) -0.016(6) 0.131(7)
C20 0.136(5) 0.102(3) 0.084(3) -0.017(3) 0.009(3) 0.001(3)
C21A 0.155(9) 0.300(17) 0.105(6) -0.057(8) 0.058(6) -0.033(11)
C22A 0.218(12) 0.117(6) 0.123(6) -0.033(5) -0.021(7) -0.034(7)
C23A 0.230(12) 0.153(8) 0.069(4) 0.001(4) -0.005(6) 0.029(8)
 
_geom_special_details
;
 All esds (except the esd in the dihedral angle between two l.s. planes)
 are estimated using the full covariance matrix.  The cell esds are taken
 into account individually in the estimation of esds in distances, angles
 and torsion angles; correlations between esds in cell parameters are only
 used when they are defined by crystal symmetry.  An approximate (isotropic)
 treatment of cell esds is used for estimating esds involving l.s. planes.
;
 
loop_
 _geom_bond_atom_site_label_1
 _geom_bond_atom_site_label_2
 _geom_bond_distance
 _geom_bond_site_symmetry_2
 _geom_bond_publ_flag
O1 C2 1.353(5) . ?
O1 H1 0.96(8) . ?
N1 C7 1.265(5) . ?
N1 C14 1.478(5) . ?
C1 C6 1.387(6) . ?
C1 C2 1.390(6) . ?
C1 C7 1.474(6) . ?
C2 C3 1.425(6) . ?
C3 C4 1.382(7) . ?
C3 C16 1.530(7) . ?
C4 C5 1.395(7) . ?
C4 H4 0.9300 . ?
C5 C6 1.389(6) . ?
C5 C20 1.530(6) . ?
C6 H6 0.9300 . ?
C7 H7 0.9300 . ?
C8 C13 1.374(6) . ?
C8 C9 1.381(6) . ?
C8 C14 1.513(6) . ?
C9 C10 1.369(7) . ?
C9 H9 0.9300 . ?
C10 C11 1.350(8) . ?
C10 H10 0.9300 . ?
C11 C12 1.369(7) . ?
C11 H11 0.9300 . ?
C12 C13 1.378(7) . ?
C12 H12 0.9300 . ?
C13 H13 0.9300 . ?
C14 C15 1.524(8) . ?
C14 H14 0.9800 . ?
C15 H15A 0.9600 . ?
C15 H15B 0.9600 . ?
C15 H15C 0.9600 . ?
C16 C17 1.523(9) . ?
C16 C19 1.538(8) . ?
C16 C18 1.555(9) . ?
C17 H17A 0.9600 . ?
C17 H17B 0.9600 . ?
C17 H17C 0.9600 . ?
C18 H18A 0.9600 . ?
C18 H18B 0.9600 . ?
C18 H18C 0.9600 . ?
C19 H19A 0.9600 . ?
C19 H19B 0.9600 . ?
C19 H19C 0.9600 . ?
C20 C21A 1.512(11) . ?
C20 C23B 1.51(2) . ?
C20 C23A 1.529(10) . ?
C20 C22A 1.534(9) . ?
C20 C22B 1.540(18) . ?
C20 C21B 1.57(2) . ?
C21A H21A 0.9600 . ?
C21A H21B 0.9600 . ?
C21A H21C 0.9600 . ?
C22A H22A 0.9600 . ?
C22A H22B 0.9600 . ?
C22A H22C 0.9600 . ?
C23A H23A 0.9600 . ?
C23A H23B 0.9600 . ?
C23A H23C 0.9600 . ?
C21B H21D 0.9600 . ?
C21B H21E 0.9600 . ?
C21B H21F 0.9600 . ?
C22B H22D 0.9600 . ?
C22B H22E 0.9600 . ?
C22B H22F 0.9600 . ?
C23B H23E 0.9600 . ?
C23B H23F 0.9600 . ?
C23B H23D 0.9600 . ?
 
loop_
 _geom_angle_atom_site_label_1
 _geom_angle_atom_site_label_2
 _geom_angle_atom_site_label_3
 _geom_angle
 _geom_angle_site_symmetry_1
 _geom_angle_site_symmetry_3
 _geom_angle_publ_flag
C2 O1 H1 101(4) . . ?
C7 N1 C14 117.5(4) . . ?
C6 C1 C2 120.8(4) . . ?
C6 C1 C7 118.2(4) . . ?
C2 C1 C7 121.1(4) . . ?
O1 C2 C1 120.4(4) . . ?
O1 C2 C3 119.7(4) . . ?
C1 C2 C3 119.8(4) . . ?
C4 C3 C2 116.5(4) . . ?
C4 C3 C16 122.4(4) . . ?
C2 C3 C16 121.0(4) . . ?
C3 C4 C5 125.0(4) . . ?
C3 C4 H4 117.5 . . ?
C5 C4 H4 117.5 . . ?
C6 C5 C4 116.4(4) . . ?
C6 C5 C20 122.6(5) . . ?
C4 C5 C20 120.9(4) . . ?
C1 C6 C5 121.4(5) . . ?
C1 C6 H6 119.3 . . ?
C5 C6 H6 119.3 . . ?
N1 C7 C1 122.8(5) . . ?
N1 C7 H7 118.6 . . ?
C1 C7 H7 118.6 . . ?
C13 C8 C9 117.5(4) . . ?
C13 C8 C14 122.2(4) . . ?
C9 C8 C14 120.1(5) . . ?
C10 C9 C8 121.0(5) . . ?
C10 C9 H9 119.5 . . ?
C8 C9 H9 119.5 . . ?
C11 C10 C9 121.0(5) . . ?
C11 C10 H10 119.5 . . ?
C9 C10 H10 119.5 . . ?
C10 C11 C12 119.3(5) . . ?
C10 C11 H11 120.4 . . ?
C12 C11 H11 120.4 . . ?
C11 C12 C13 120.1(5) . . ?
C11 C12 H12 119.9 . . ?
C13 C12 H12 119.9 . . ?
C8 C13 C12 121.1(5) . . ?
C8 C13 H13 119.5 . . ?
C12 C13 H13 119.5 . . ?
N1 C14 C8 110.5(4) . . ?
N1 C14 C15 109.0(4) . . ?
C8 C14 C15 111.0(4) . . ?
N1 C14 H14 108.8 . . ?
C8 C14 H14 108.8 . . ?
C15 C14 H14 108.8 . . ?
C14 C15 H15A 109.5 . . ?
C14 C15 H15B 109.5 . . ?
H15A C15 H15B 109.5 . . ?
C14 C15 H15C 109.5 . . ?
H15A C15 H15C 109.5 . . ?
H15B C15 H15C 109.5 . . ?
C17 C16 C3 109.1(5) . . ?
C17 C16 C19 108.4(6) . . ?
C3 C16 C19 111.2(5) . . ?
C17 C16 C18 109.9(5) . . ?
C3 C16 C18 110.5(4) . . ?
C19 C16 C18 107.8(6) . . ?
C16 C17 H17A 109.5 . . ?
C16 C17 H17B 109.5 . . ?
H17A C17 H17B 109.5 . . ?
C16 C17 H17C 109.5 . . ?
H17A C17 H17C 109.5 . . ?
H17B C17 H17C 109.5 . . ?
C16 C18 H18A 109.5 . . ?
C16 C18 H18B 109.5 . . ?
H18A C18 H18B 109.5 . . ?
C16 C18 H18C 109.5 . . ?
H18A C18 H18C 109.5 . . ?
H18B C18 H18C 109.5 . . ?
C16 C19 H19A 109.5 . . ?
C16 C19 H19B 109.5 . . ?
H19A C19 H19B 109.5 . . ?
C16 C19 H19C 109.5 . . ?
H19A C19 H19C 109.5 . . ?
H19B C19 H19C 109.5 . . ?
C21A C20 C23A 109.4(8) . . ?
C21A C20 C5 109.2(6) . . ?
C23B C20 C5 105.0(14) . . ?
C23A C20 C5 113.3(5) . . ?
C21A C20 C22A 110.5(8) . . ?
C23A C20 C22A 105.5(7) . . ?
C5 C20 C22A 109.1(5) . . ?
C23B C20 C22B 113.0(18) . . ?
C5 C20 C22B 112.0(11) . . ?
C23B C20 C21B 115.3(19) . . ?
C5 C20 C21B 104.1(12) . . ?
C22B C20 C21B 107.2(17) . . ?
C20 C21A H21A 109.5 . . ?
C20 C21A H21B 109.5 . . ?
H21A C21A H21B 109.5 . . ?
C20 C21A H21C 109.5 . . ?
H21A C21A H21C 109.5 . . ?
H21B C21A H21C 109.5 . . ?
C20 C22A H22A 109.5 . . ?
C20 C22A H22B 109.5 . . ?
H22A C22A H22B 109.5 . . ?
C20 C22A H22C 109.5 . . ?
H22A C22A H22C 109.5 . . ?
H22B C22A H22C 109.5 . . ?
C20 C23A H23A 109.5 . . ?
C20 C23A H23B 109.5 . . ?
H23A C23A H23B 109.5 . . ?
C20 C23A H23C 109.5 . . ?
H23A C23A H23C 109.5 . . ?
H23B C23A H23C 109.5 . . ?
C20 C21B H21D 109.5 . . ?
C20 C21B H21E 109.5 . . ?
H21D C21B H21E 109.5 . . ?
C20 C21B H21F 109.5 . . ?
H21D C21B H21F 109.5 . . ?
H21E C21B H21F 109.5 . . ?
C20 C22B H22D 109.5 . . ?
C20 C22B H22E 109.5 . . ?
H22D C22B H22E 109.5 . . ?
C20 C22B H22F 109.5 . . ?
H22D C22B H22F 109.5 . . ?
H22E C22B H22F 109.5 . . ?
C20 C23B H23E 109.5 . . ?
C20 C23B H23F 109.5 . . ?
H23E C23B H23F 109.5 . . ?
C20 C23B H23D 109.5 . . ?
H23E C23B H23D 109.5 . . ?
H23F C23B H23D 109.5 . . ?
 
_refine_diff_density_max    0.198
_refine_diff_density_min   -0.176
_refine_diff_density_rms    0.059

_shelx_res_file
;
TITL d_a.res in P2(1)2(1)2(1)
    dd.res
    created by SHELXL-2016/6 at 17:49:07 on 15-Nov-2016
REM Old TITL shelxl_a.res in P2(1)2(1)2(1)
REM SHELXT solution in P2(1)2(1)2(1)
REM R1 0.228,  Rweak 0.121,  Alpha 0.009,  Orientation as input
REM Flack x =  0.023 ( 0.178 ) from Parsons' quotients
REM Formula found by SHELXT:  C21 N3 O
CELL  1.54187   6.3058  35.0710   9.8851   90.000   90.000   90.000
ZERR    4.000   0.0004   0.0020   0.0006    0.000    0.000    0.000
LATT -1
SYMM 1/2-X, -Y, 1/2+Z
SYMM -X, 1/2+Y, 1/2-Z
SYMM 1/2+X, 1/2-Y, -Z
SFAC C H N O
UNIT 92 124 4 4
L.S. 10
BOND $H
LIST 6
FMAP 2
PLAN 20
DFIX 1.527 C20 C21B
DFIX 1.527 C20 C22B
DFIX 1.527 C20 C23B
ACTA
REM PART 1
REM PART 2
WGHT    0.096000    0.249300
EXTI    0.023311
FVAR       0.93358   0.78310
O1    4   -0.096834    0.124422    0.604767    11.00000    0.11891    0.10342 =
         0.07630   -0.00808   -0.00161    0.01615
N1    3   -0.350454    0.181592    0.567635    11.00000    0.09158    0.08948 =
         0.08615   -0.01716    0.00814    0.01111
C1    1   -0.231826    0.140706    0.387322    11.00000    0.09113    0.08142 =
         0.07317   -0.00894    0.00904    0.00136
H1    2   -0.187790    0.146294    0.612082    11.00000    0.16903
C2    1   -0.107546    0.117739    0.470098    11.00000    0.09869    0.07812 =
         0.07311   -0.00556    0.00735    0.00129
C3    1    0.012078    0.087331    0.412509    11.00000    0.10623    0.07994 =
         0.08746   -0.00326    0.00733    0.00839
C4    1   -0.008665    0.081925    0.274707    11.00000    0.12273    0.08099 =
         0.08603   -0.00745    0.01338    0.01160
AFIX  43
H4    2    0.067904    0.062094    0.235781    11.00000   -1.20000
AFIX   0
C5    1   -0.135563    0.103912    0.189475    11.00000    0.11334    0.08272 =
         0.07235   -0.00861    0.01042   -0.00300
C6    1   -0.245273    0.133796    0.249441    11.00000    0.10792    0.08131 =
         0.08011   -0.00722    0.00612    0.00361
AFIX  43
H6    2   -0.329542    0.149508    0.196017    11.00000   -1.20000
AFIX   0
C7    1   -0.352408    0.173060    0.443315    11.00000    0.08638    0.09246 =
         0.09020   -0.01056    0.00491    0.00414
AFIX  43
H7    2   -0.433413    0.187837    0.384729    11.00000   -1.20000
AFIX   0
C8    1   -0.362102    0.239761    0.706076    11.00000    0.08015    0.09303 =
         0.07977   -0.01403    0.00449    0.00812
C9    1   -0.392026    0.278749    0.701165    11.00000    0.11934    0.08720 =
         0.10372   -0.01122    0.00098    0.02622
AFIX  43
H9    2   -0.480627    0.289087    0.635503    11.00000   -1.20000
AFIX   0
C10   1   -0.293177    0.302407    0.791538    11.00000    0.12649    0.09128 =
         0.12231   -0.01875    0.00619    0.00473
AFIX  43
H10   2   -0.315505    0.328578    0.786291    11.00000   -1.20000
AFIX   0
C11   1   -0.163755    0.288294    0.888162    11.00000    0.09992    0.11856 =
         0.10759   -0.02169    0.00828   -0.01072
AFIX  43
H11   2   -0.098273    0.304565    0.949594    11.00000   -1.20000
AFIX   0
C12   1   -0.129951    0.249773    0.894735    11.00000    0.10001    0.13772 =
         0.09131   -0.00975   -0.00818    0.00516
AFIX  43
H12   2   -0.040611    0.239788    0.960677    11.00000   -1.20000
AFIX   0
C13   1   -0.228100    0.225765    0.803787    11.00000    0.09930    0.09859 =
         0.09342   -0.00624   -0.00389    0.01217
AFIX  43
H13   2   -0.203206    0.199664    0.808647    11.00000   -1.20000
AFIX   0
C14   1   -0.484255    0.213902    0.611578    11.00000    0.08482    0.10411 =
         0.10052   -0.02582   -0.00297    0.01586
AFIX  13
H14   2   -0.526648    0.228583    0.531675    11.00000   -1.20000
AFIX   0
C15   1   -0.682855    0.198347    0.680019    11.00000    0.09597    0.15769 =
         0.16716   -0.06501    0.03103   -0.01954
AFIX 137
H15A  2   -0.756322    0.181736    0.618685    11.00000   -1.50000
H15B  2   -0.773967    0.219132    0.704832    11.00000   -1.50000
H15C  2   -0.643348    0.184378    0.759643    11.00000   -1.50000
AFIX   0
C16   1    0.147956    0.061229    0.501259    11.00000    0.14909    0.09245 =
         0.10398   -0.00366    0.00258    0.03799
C17   1    0.005045    0.040505    0.601300    11.00000    0.21010    0.10539 =
         0.12294    0.02450   -0.02060    0.00081
AFIX 137
H17A  2   -0.065802    0.058799    0.657660    11.00000   -1.50000
H17B  2    0.089169    0.023848    0.656609    11.00000   -1.50000
H17C  2   -0.098337    0.025802    0.552708    11.00000   -1.50000
AFIX   0
C18   1    0.317612    0.084816    0.578909    11.00000    0.12279    0.14949 =
         0.15553   -0.00204   -0.02126    0.02680
AFIX 137
H18A  2    0.248367    0.102898    0.636919    11.00000   -1.50000
H18B  2    0.405698    0.098121    0.515301    11.00000   -1.50000
H18C  2    0.403511    0.067992    0.632446    11.00000   -1.50000
AFIX   0
C19   1    0.264876    0.031288    0.415551    11.00000    0.27640    0.15854 =
         0.14738   -0.01731   -0.01625    0.13130
AFIX 137
H19A  2    0.346769    0.015043    0.473695    11.00000   -1.50000
H19B  2    0.357456    0.043896    0.352758    11.00000   -1.50000
H19C  2    0.163407    0.016231    0.366684    11.00000   -1.50000
AFIX   0
C20   1   -0.146853    0.095598    0.037735    11.00000    0.13570    0.10194 =
         0.08403   -0.01697    0.00907    0.00093
PART 1
C21A  1    0.072880    0.098870   -0.022408    21.00000    0.15487    0.30034 =
         0.10530   -0.05703    0.05769   -0.03343
AFIX 137
H21A  2    0.169337    0.083136    0.027885    21.00000   -1.50000
H21B  2    0.119015    0.124931   -0.018303    21.00000   -1.50000
H21C  2    0.069789    0.090622   -0.114989    21.00000   -1.50000
AFIX   0
C22A  1   -0.235270    0.055304    0.016548    21.00000    0.21777    0.11746 =
         0.12269   -0.03283   -0.02072   -0.03442
AFIX 137
H22A  2   -0.227653    0.048798   -0.077659    21.00000   -1.50000
H22B  2   -0.380330    0.054468    0.045873    21.00000   -1.50000
H22C  2   -0.153179    0.037423    0.068167    21.00000   -1.50000
AFIX   0
C23A  1   -0.298109    0.122113   -0.038273    21.00000    0.22953    0.15257 =
         0.06894    0.00148   -0.00491    0.02937
AFIX 137
H23A  2   -0.246942    0.147844   -0.032614    21.00000   -1.50000
H23B  2   -0.436724    0.120622    0.001534    21.00000   -1.50000
H23C  2   -0.305605    0.114516   -0.131452    21.00000   -1.50000
AFIX   0
PART 2
C21B  1   -0.029708    0.130316   -0.029341   -21.00000    0.11503
AFIX 137
H21D  2   -0.024246    0.126725   -0.125555   -21.00000   -1.50000
H21E  2    0.111895    0.132036    0.005798   -21.00000   -1.50000
H21F  2   -0.105188    0.153404   -0.009257   -21.00000   -1.50000
AFIX   0
C22B  1   -0.022330    0.059394   -0.000526   -21.00000    0.10386
AFIX 137
H22D  2   -0.073016    0.038272    0.052108   -21.00000   -1.50000
H22E  2    0.125720    0.063283    0.017407   -21.00000   -1.50000
H22F  2   -0.042074    0.054059   -0.094943   -21.00000   -1.50000
AFIX   0
C23B  1   -0.381361    0.092571    0.006596   -21.00000    0.13736
AFIX 137
H23E  2   -0.441751    0.071968    0.057631   -21.00000   -1.50000
H23F  2   -0.400475    0.087834   -0.088275   -21.00000   -1.50000
H23D  2   -0.450536    0.115990    0.030688   -21.00000   -1.50000
PART 0
AFIX   0
HKLF 4


REM  d_a.res in P2(1)2(1)2(1)
REM R1 =  0.0681 for    2108 Fo > 4sig(Fo)  and  0.1257 for all    3986 data
REM    254 parameters refined using      3 restraints

END

WGHT      0.0960      0.2493

REM Highest difference peak  0.198,  deepest hole -0.176,  1-sigma level  0.059
Q1    1   0.1088  0.0735  0.4614  11.00000  0.05    0.20
Q2    1   0.1917  0.0668  0.5142  11.00000  0.05    0.19
Q3    1   0.0441  0.0949 -0.1747  11.00000  0.05    0.19
Q4    1   0.1857  0.0720  0.5934  11.00000  0.05    0.18
Q5    1   0.2156  0.0683  0.6467  11.00000  0.05    0.18
Q6    1  -0.0269  0.0983  0.7246  11.00000  0.05    0.18
Q7    1   0.1295  0.0728  0.7035  11.00000  0.05    0.18
Q8    1   0.0427  0.0739  0.6768  11.00000  0.05    0.18
Q9    1   0.0872  0.0655 -0.1217  11.00000  0.05    0.18
Q10   1  -0.0054  0.0788  0.4443  11.00000  0.05    0.17
Q11   1  -0.1387  0.1014  0.0982  11.00000  0.05    0.17
Q12   1   0.0094  0.0859  0.5629  11.00000  0.05    0.17
Q13   1   0.0516  0.0909 -0.0823  11.00000  0.05    0.16
Q14   1  -0.1248  0.0815  0.0333  11.00000  0.05    0.16
Q15   1  -0.2293  0.2603  0.6023  11.00000  0.05    0.16
Q16   1   0.1276  0.0604  0.3393  11.00000  0.05    0.16
Q17   1   0.0011  0.0789  0.1232  11.00000  0.05    0.16
Q18   1  -0.1271  0.2563  0.7052  11.00000  0.05    0.16
Q19   1   0.1592  0.0647  0.3653  11.00000  0.05    0.15
Q20   1  -0.0526  0.2763  0.7590  11.00000  0.05    0.15
;
_shelx_res_checksum   35250

_shelx_hkl_file
;
   0  -3   0    4.13    0.83
   0  -3   0    6.31    1.04
   0   3   0    5.76    1.04
   0  -3   0    4.17    0.86
   0   3   0    3.35    0.83
   0  -3   0    3.17    0.86
   0   3   0    3.38    0.83
   0  -3   0    3.88    0.74
   0   3   0    3.54    0.74
   0  -3   0    3.75    0.71
   0  -3   0    3.34    0.86
   0  -3   0    2.13    0.93
   0   3   0    3.92    0.72
   0   3   0    3.38    0.67
   0   4   0 2455.50  262.46
   0   4   0 2461.56  262.78
   0   4   0 2107.35  230.38
   0   4   0 2853.52  306.21
   0  -4   0 2782.62  295.62
   0  -4   0 2639.20  279.47
   0  -4   0 2500.56  264.22
   0  -4   0 2600.82  277.26
   0  -4   0 2775.48  295.27
   0   4   0 2462.72  259.74
   0  -4   0 2807.21  294.91
   0   4   0 2552.19  268.83
   0  -4   0 2511.95  269.84
   0   4   0 2515.31  267.72
   0  -4   0 2367.04  253.41
   0  -4   0 2821.11  302.58
   0  -5   0    0.39    1.84
   0  -5   0    0.71    1.26
   0  -5   0    0.88    1.74
   0   5   0    1.28    1.49
   0  -5   0    0.78    1.91
   0  -5   0    0.37    1.72
   0   5   0    4.51    1.82
   0  -5   0    0.80    1.62
   0   5   0    0.71    1.51
   0  -5   0    6.52    1.50
   0   5   0    0.55    1.16
   0   6   0 7591.54 1290.37
   0  -6   0 9580.78 1620.85
   0   6   0 7680.26 1308.36
   0  -6   0 8492.31 1446.62
   0   6   0 7772.85 1322.11
   0  -6   0 9095.77 1539.83
   0   6   0 7707.68 1310.79
   0   6   0 8316.31 1422.41
   0  -6   0 8432.66 1425.83
   0   6   0 7729.53 1304.15
   0  -6   0 8272.22 1394.90
   0  -6   0 9345.10 1591.56
   0   7   0    1.78    1.96
   0   7   0    0.22    1.75
   0   7   0    1.67    1.64
   0   7   0    0.09    2.12
   0  -7   0    6.29    1.84
   0   7   0    0.42    1.92
   0  -7   0    0.21    2.28
   0  -7   0   -0.17    2.08
   0   7   0    0.01    1.34
   0  -7   0    5.24    1.55
   0  -7   0   -0.22    2.53
   0  -8   0   61.71    6.18
   0   8   0   58.51    7.52
   0  -8   0   62.95    8.21
   0   8   0   50.68    6.41
   0  -8   0   65.01    6.76
   0   8   0   61.85    9.34
   0   8   0   53.92    7.30
   0   8   0   54.13    5.88
   0  -8   0   61.57    5.87
   0  -8   0   66.39    7.63
   0   8   0   51.64    5.79
   0   8   0   50.26    6.75
   0  -8   0   72.04    9.02
   0   9   0    0.61    1.41
   0  -9   0    0.36    2.20
   0   9   0    0.11    1.63
   0   9   0    0.07    1.18
   0  -9   0    0.29    1.57
   0  -9   0    0.87    1.35
   0   9   0    0.03    1.76
   0   9   0    0.29    1.71
   0  -9   0    0.97    2.00
   0  -9   0    0.37    2.14
   0  -9   0    0.17    1.78
   0  10   0  905.66   80.13
   0  10   0  988.27   89.10
   0 -10   0 1164.79   97.14
   0  10   0  997.11   90.30
   0  10   0  913.00   80.42
   0  10   0  887.92   77.90
   0 -10   0 1202.11  103.05
   0  10   0  947.29   84.50
   0 -10   0 1238.88  109.34
   0 -10   0 1088.36   92.89
   0 -10   0 1119.62   91.85
   0  10   0  971.31   83.47
   0  10   0 1060.01   88.54
   0 -10   0 1152.35  101.29
   0 -10   0 1397.83  116.35
   0 -11   0    0.07    1.53
   0 -11   0   -0.43    1.58
   0  11   0    0.14    1.21
   0  11   0   -0.33    1.21
   0  11   0   -0.14    1.00
   0  11   0    3.10    3.51
   0 -11   0    0.28    1.01
   0 -11   0   -0.16    1.30
   0  11   0    1.76    1.22
   0  11   0   -0.28    1.47
   0  11   0    0.14    1.53
   0  11   0    0.05    1.45
   0 -11   0    1.20    1.24
   0  11   0    0.46    2.05
   0 -11   0    0.26    1.93
   0 -11   0   -0.01    1.70
   0  12   0 1494.52  154.34
   0 -12   0 1903.79  190.57
   0 -12   0 2416.90  233.36
   0  12   0 1529.32  156.74
   0  12   0 1658.05  161.92
   0  12   0 1970.24  200.08
   0 -12   0 2116.07  212.20
   0  12   0 1465.26  149.68
   0 -12   0 1888.14  180.25
   0 -12   0 1780.81  174.53
   0 -12   0 2024.14  200.06
   0  12   0 1349.54  137.80
   0  12   0 1870.36  191.69
   0 -12   0 2090.00  201.82
   0  12   0 1610.78  159.18
   0  12   0 1394.63  140.83
   0 -13   0    1.75    1.67
   0  13   0   -0.08    1.26
   0  13   0   -0.12    2.05
   0  13   0    0.39    2.03
   0  13   0   -0.14    1.46
   0  13   0   -0.38    3.43
   0 -13   0    0.18    1.29
   0  13   0    0.29    0.96
   0  13   0   -0.08    1.53
   0  13   0    0.58    1.16
   0  13   0    1.26    1.12
   0 -13   0   -0.04    1.99
   0 -13   0    0.30    1.42
   0 -13   0    0.86    1.21
   0 -13   0    0.28    1.72
   0 -13   0    0.12    0.96
   0  14   0   63.60    4.95
   0 -14   0   88.62    9.26
   0 -14   0   73.07    9.31
   0 -14   0   75.15    8.46
   0 -14   0   75.50    8.02
   0  14   0   70.99    9.71
   0  14   0   50.18    5.77
   0  14   0   68.62    8.46
   0  14   0   55.80    7.17
   0  14   0   53.54    6.38
   0  14   0   70.27    9.30
   0  14   0   67.78    8.97
   0 -14   0   84.63    8.05
   0  14   0   48.16    4.99
   0 -14   0   78.27    5.18
   0 -14   0   92.51    7.14
   0  15   0    0.24    1.32
   0  15   0    0.20    1.58
   0 -15   0    0.03    1.13
   0  15   0    0.37    1.80
   0  15   0    0.32    1.78
   0  15   0   -0.11    1.10
   0 -15   0   -0.11    0.92
   0 -15   0    0.75    1.78
   0 -15   0   -0.13    1.14
   0 -15   0    0.93    0.78
   0  15   0   -0.01    2.07
   0  15   0    0.08    0.86
   0  15   0   -0.13    0.76
   0 -15   0    0.08    1.51
   0  15   0   -0.01    0.97
   0 -16   0   34.65    5.50
   0  16   0   28.75    6.45
   0 -16   0   40.65    5.62
   0  16   0   28.57    3.00
   0 -16   0   37.38    4.22
   0 -16   0   37.74    3.17
   0 -16   0   43.24    4.58
   0  16   0   21.30    3.33
   0  16   0   21.97    3.95
   0  16   0   22.20    8.12
   0  16   0   29.54    5.81
   0  16   0   29.60    6.48
   0  16   0   28.32    3.60
   0 -16   0   34.52    3.68
   0 -16   0   46.67    6.54
   0  16   0   39.08    7.25
   0 -17   0    0.88    0.87
   0  17   0   -0.22    2.37
   0 -17   0   -0.11    1.89
   0 -17   0    0.79    1.22
   0 -17   0   -0.21    1.13
   0  17   0    5.68    2.29
   0  17   0   -0.36    1.17
   0  17   0    0.12    1.93
   0  17   0   -0.11    1.34
   0  17   0   -0.07    2.24
   0 -17   0    0.16    1.84
   0  17   0    0.17    0.84
   0 -17   0    1.78    1.37
   0  17   0    0.13    1.95
   0 -17   0    1.22    2.16
   0 -18   0  141.88    8.88
   0  18   0  113.54   14.25
   0  18   0   83.96    9.06
   0 -18   0  140.56    9.83
   0 -18   0  141.12   10.22
   0 -18   0  154.01   13.32
   0  18   0  112.99    9.17
   0  18   0  108.40    7.59
   0  18   0  111.36   13.82
   0 -18   0  159.31   14.92
   0  18   0  135.92   15.09
   0  18   0  111.52   12.75
   0 -18   0  166.57   11.67
   0  18   0  107.61   12.72
   0 -18   0  135.46   13.11
   0  19   0    0.00    0.74
   0 -19   0    0.57    1.09
   0  19   0    0.37    1.79
   0  19   0   -0.53    2.09
   0  19   0    0.50    2.26
   0 -19   0   -0.17    0.75
   0 -19   0    0.61    1.67
   0  19   0    0.41    1.75
   0  19   0    0.14    0.97
   0 -19   0    0.83    0.95
   0 -19   0    1.41    1.71
   0 -19   0   -0.05    0.92
   0  19   0   -0.79    2.12
   0 -19   0    0.49    3.71
   0 -20   0  212.32   18.48
   0  20   0  130.83   14.71
   0  20   0  127.53   11.04
   0  20   0  137.30   15.15
   0  20   0  136.14   17.11
   0 -20   0  163.61   15.15
   0 -20   0  163.56   11.59
   0  20   0  130.74   10.15
   0 -20   0  181.51   11.94
   0  20   0  141.34   17.46
   0 -20   0  177.43   12.63
   0 -20   0  188.85   22.09
   0  20   0  160.29   17.26
   0  21   0    0.13    1.93
   0 -21   0    0.34    0.87
   0 -21   0   -0.12    1.72
   0 -21   0   -0.68    0.87
   0 -21   0    0.89    1.85
   0 -21   0    0.03    0.67
   0  21   0    0.58    1.60
   0 -21   0    0.86    2.87
   0  21   0    0.18    2.17
   0  21   0    0.66    1.95
   0  21   0   -0.45    2.42
   0 -21   0   -0.51    0.86
   0  21   0   -0.29    0.80
   0  21   0    0.68    1.58
   0  21   0   -0.01    0.68
   0  22   0  270.00   18.38
   0  22   0  258.21   27.01
   0 -22   0  300.33   19.90
   0  22   0  276.47   29.62
   0 -22   0  368.01   31.14
   0  22   0  221.68   22.84
   0  22   0  217.61   16.21
   0 -22   0  391.95   31.46
   0 -22   0  306.43   26.36
   0  22   0  233.67   26.69
   0  22   0  219.67   19.65
   0  22   0  206.99   28.95
   0  22   0  227.83   23.43
   0 -22   0  304.71   21.61
   0  23   0   -0.42    2.58
   0  23   0   -0.45    2.28
   0 -23   0   -0.33    0.80
   0  23   0    0.70    1.80
   0 -23   0   -0.42    2.04
   0 -23   0   -0.01    1.78
   0 -23   0   -0.11    2.05
   0  23   0    0.14    0.82
   0  23   0    0.51    2.14
   0 -23   0   -0.30    0.96
   0  24   0   76.77   13.00
   0  24   0   82.88   14.98
   0  24   0   76.27   10.73
   0 -24   0   69.86    6.87
   0 -24   0  102.94   11.34
   0  24   0   75.96   12.80
   0  25   0    0.93    6.02
   0  25   0    0.29    2.89
   0  25   0    0.51    2.25
   0 -25   0    0.59    2.21
   0  26   0   88.93   17.35
   0  26   0   75.06   14.42
   0 -26   0  105.26   12.34
   0  26   0   74.32   11.58
   0 -27   0   -0.63    1.88
   0  27   0    0.47    1.92
   0  27   0   -0.26    2.47
   0  27   0    0.09    3.25
   0 -28   0    2.16    2.96
   0  28   0    0.58    5.22
   0  28   0    1.41    7.38
   0  28   0    2.14    2.97
   0  29   0   -2.38    4.51
   0  29   0   -0.53    2.55
   0  29   0   -2.50    4.58
   0 -29   0   -0.24    2.57
   0 -30   0    9.62    4.28
   0  30   0    7.21    4.34
   0  30   0   11.06    7.76
   0  30   0    7.62    7.80
   0 -31   0   -0.08    2.10
   0  31   0   -1.30    3.62
   0  31   0   -2.79    3.80
   0  31   0    0.29    2.10
   0  32   0    9.94    6.91
   0 -32   0    8.72    4.22
   0  32   0    9.69    7.37
   0  33   0    2.09    3.91
   0 -33   0   -0.91    2.46
   0  33   0    1.87    3.62
   0 -34   0   -0.20    3.45
   0  34   0   10.26    4.95
   0 -34   0    0.62    3.43
   0  34   0   -0.12    5.20
   0 -35   0    0.03    2.34
   0  35   0    0.13    3.46
   0 -35   0   -1.09    2.24
   0  35   0    1.66    3.12
   0 -36   0    8.08    4.92
   0  36   0    4.16    6.04
   0 -36   0    0.20    4.60
   0  36   0   -0.11    6.67
   0  37   0    0.82    3.85
   0  37   0   -0.05    4.47
   0 -37   0   -0.07    3.13
   0 -37   0   -1.68    3.39
   0  38   0    4.75    6.66
   0 -38   0    3.74    4.68
   0  38   0   -0.11    7.81
   0 -38   0   -0.04    4.35
   0  39   0    0.00    5.01
   0 -39   0   -0.07    2.79
   0 -39   0    0.07    2.57
   0  39   0    0.57    4.26
   0  40   0   -0.43    6.76
   0  40   0    3.09    7.94
   0 -40   0    4.28    4.18
   0 -40   0    0.64    4.35
   0  41   0    3.33    6.84
   0  41   0   -8.83    9.60
   0 -41   0   -3.80    3.62
   0 -41   0    0.21    4.30
   0  42   0   -2.84    9.04
   0  42   0   -5.13   10.84
   0   0   1    4.21    1.38
   0   0   1    1.79    1.38
   0   0   1    0.11    1.17
   0   0  -1   -0.07    1.39
   0   0   1   -0.04    0.75
   0   0  -1    2.24    1.04
   0   0   1    1.17    1.47
   0   0  -1    1.59    1.20
   0   0   1    0.09    1.12
   0   0  -1    1.39    1.16
   0   0  -1    6.18    1.41
   0   0  -1    1.70    0.71
   0  -1   1 1602.06  144.79
   0   1   1 1637.48  157.95
   0   1  -1 1691.25  154.22
   0   1   1 1618.34  161.00
   0  -1   1 1622.63  148.22
   0  -1   1 1699.62  160.27
   0  -1  -1 1589.18  147.92
   0  -1   1 1317.72  127.72
   0   1   1 1567.09  152.28
   0   1  -1 1681.07  155.66
   0   1  -1 1714.51  165.16
   0  -1   1 1731.11  157.53
   0  -1  -1 1694.98  158.95
   0  -1  -1 1665.47  156.19
   0  -1  -1 1959.67  183.14
   0  -1  -1 1693.62  157.95
   0   1   1 1698.62  159.22
   0  -1  -1 1718.78  152.35
   0   1   1 1663.62  154.91
   0  -1   1 1845.04  174.61
   0   1  -1 1785.16  163.11
   0  -1  -1 1849.85  169.74
   0   1   1 1632.22  150.80
   0  -1   1 1650.21  154.02
   0   1  -1 1620.70  152.18
   0   1   1 2043.12  178.85
   0   1  -1 1702.08  159.93
   0  -1   1 1711.67  161.74
   0   2  -1 1319.79  107.49
   0   2   1 1109.43   93.27
   0  -2  -1 1135.62   94.50
   0  -2   1  872.97   80.65
   0   2   1 1199.68  100.80
   0  -2  -1 1185.20   96.73
   0  -2   1 1124.31   92.60
   0   2   1 1191.30   97.96
   0  -2  -1 1102.84   92.58
   0  -2  -1 1195.44   91.50
   0   2  -1 1159.55   94.75
   0   2   1 1281.89  106.72
   0  -2  -1 1082.28   89.84
   0   2  -1 1029.26   86.64
   0   2   1 1118.81   93.30
   0   2  -1 1100.06   93.21
   0  -2   1 1086.13   92.42
   0   2  -1 1153.44   93.39
   0  -2  -1 1259.53   95.23
   0  -2   1 1238.13  105.10
   0   2   1 1144.93   95.75
   0  -2   1 1137.82   94.80
   0   2  -1 1183.46   89.64
   0   2   1 1074.62   82.44
   0   2  -1 1021.02   77.95
   0  -2  -1 1193.25   99.85
   0   2  -1 1026.11   84.61
   0   2  -1 1033.29   94.00
   0  -2  -1 1182.14   99.54
   0   3  -1  672.21   49.00
   0   3  -1  627.11   46.96
   0  -3  -1  693.12   51.59
   0   3   1  693.00   51.35
   0  -3   1  721.05   67.16
   0  -3   1  667.36   50.85
   0   3   1  645.83   43.93
   0   3  -1  692.61   45.92
   0   3  -1  743.89   54.33
   0  -3  -1  758.09   59.01
   0   3   1  644.52   58.09
   0  -3  -1  666.60   50.98
   0   3  -1  664.25   51.46
   0   3  -1  610.63   41.29
   0  -3  -1  705.56   53.96
   0   3  -1  697.58   52.42
   0  -3   1  640.07   51.12
   0   3   1  669.29   52.52
   0  -3   1  632.65   49.83
   0   3   1  675.68   51.59
   0   3  -1  593.29   46.43
   0  -3  -1  802.78   59.38
   0  -3   1  596.89   45.10
   0  -3  -1  676.80   42.21
   0   3   1  693.82   53.55
   0  -3  -1  666.64   52.09
   0   4  -1  382.16   28.36
   0  -4  -1  465.14   32.00
   0  -4   1  352.12   27.66
   0  -4  -1  384.71   35.29
   0  -4   1  319.90   22.68
   0  -4  -1  431.58   32.19
   0  -4   1  255.54   29.87
   0   4  -1  355.34   24.43
   0   4   1  395.83   29.23
   0   4  -1  338.62   20.72
   0   4  -1  324.07   24.90
   0   4   1  344.73   21.39
   0   4  -1  367.40   21.35
   0   4   1  332.18   24.11
   0   4  -1  384.31   27.52
   0   4   1  374.01   24.83
   0   4   1  384.37   28.43
   0  -4  -1  391.22   27.82
   0   4  -1  353.10   24.69
   0  -4  -1  374.07   28.07
   0   4  -1  365.94   21.73
   0  -4  -1  391.68   26.91
   0  -4   1  371.64   27.12
   0  -4   1  371.57   28.16
   0  -4  -1  341.06   18.30
   0  -4   1  374.27   36.44
   0  -5  -1  158.31   13.52
   0   5   1  136.21   12.14
   0   5  -1  126.90   11.08
   0   5  -1  123.30   11.65
   0  -5   1  154.36   13.79
   0   5   1  158.43   13.38
   0   5  -1  144.51   10.90
   0  -5   1  159.93   18.72
   0   5  -1  148.35    7.37
   0   5   1  137.20   11.14
   0   5  -1  157.27    9.05
   0  -5   1  126.86   12.30
   0  -5  -1  197.30   15.43
   0   5  -1  148.03    8.98
   0   5   1  152.43   10.44
   0  -5   1  144.65    9.87
   0  -5  -1  181.55   13.11
   0  -5  -1  166.95   11.69
   0   5   1  146.17   12.13
   0  -5  -1  164.07   12.11
   0  -5   1  136.14   10.23
   0   5  -1  161.21   12.58
   0  -5  -1  139.16    6.01
   0   5   1  142.01    9.01
   0   5  -1  134.63   10.12
   0  -5   1  157.94   12.89
   0   6   1  674.02   54.72
   0   6   1  602.37   49.70
   0   6   1  583.05   43.72
   0  -6   1  805.20   70.60
   0   6   1  568.18   44.63
   0   6  -1  618.68   63.28
   0   6  -1  524.14   40.38
   0   6  -1  666.30   47.54
   0  -6  -1  626.51   39.49
   0  -6   1  613.72   45.28
   0   6   1  556.77   40.79
   0  -6   1  657.92   54.17
   0  -6  -1  638.89   48.77
   0   6  -1  458.45   38.46
   0   6  -1  589.52   46.16
   0   6  -1  535.25   44.05
   0  -6  -1  648.55   52.69
   0  -6   1  532.44   45.71
   0  -6   1  608.22   49.49
   0  -6  -1  651.19   56.73
   0   6  -1  587.02   46.17
   0   6   1  627.84   50.45
   0   6  -1  581.61   41.22
   0  -6   1  560.24   42.58
   0   6  -1  550.54   39.95
   0  -6  -1  750.27   59.55
   0  -6  -1  623.09   47.68
   0  -6  -1  608.95   45.72
   0  -7  -1 3610.90  433.28
   0  -7   1 3365.10  414.43
   0   7   1 2914.91  352.55
   0  -7   1 3667.79  438.29
   0  -7   1 3252.36  391.36
   0  -7  -1 3587.42  433.53
   0  -7  -1 3705.21  427.08
   0   7   1 3240.31  403.90
   0  -7   1 2864.12  358.16
   0   7   1 3139.51  382.71
   0   7  -1 3169.54  387.84
   0   7   1 3543.77  438.50
   0   7  -1 2725.07  331.23
   0  -7  -1 3602.24  435.17
   0   7  -1 2357.68  298.34
   0   7   1 3127.02  379.10
   0  -7  -1 3609.10  429.95
   0  -7   1 2974.54  372.26
   0   7   1 3596.96  433.12
   0   7  -1 3292.95  383.28
   0  -7  -1 3645.78  447.39
   0  -7  -1 4185.95  510.70
   0   7  -1 3280.50  435.21
   0   7  -1 2907.48  359.93
   0   7   1 3382.55  417.03
   0  -7   1 3800.17  467.71
   0   7  -1 3116.11  372.52
   0   7  -1 2971.29  357.25
   0   7  -1 3205.89  391.99
   0   8   1    1.14    1.96
   0  -8  -1    3.09    3.38
   0  -8   1    0.49    3.13
   0   8  -1    1.04    1.83
   0  -8  -1    0.93    3.01
   0   8  -1    1.17    1.00
   0   8  -1    0.68    2.49
   0  -8   1    1.12    2.18
   0  -8   1    0.68    2.75
   0  -8   1    0.80    2.91
   0   8   1    0.36    1.97
   0  -8  -1    1.35    2.28
   0   8   1    2.28    2.22
   0   8  -1    1.05    1.57
   0  -8  -1    1.92    2.28
   0   8  -1    0.82    4.88
   0   8  -1    0.38    2.33
   0   8  -1    0.36    3.43
   0  -8   1    1.39    1.97
   0   8  -1    0.55    2.53
   0   8   1    1.09    2.12
   0  -8  -1    1.97    1.84
   0   8   1    0.89    3.42
   0   8  -1    0.43    2.66
   0  -8   1    1.07    3.31
   0  -8  -1    4.70    1.08
   0  -8  -1    9.75    2.34
   0   8   1    0.99    2.89
   0   9  -1    9.22    7.10
   0   9   1    8.08    4.89
   0   9  -1   13.89    2.87
   0   9   1    7.77    2.81
   0   9   1   15.25    4.20
   0  -9  -1   10.00    3.47
   0   9   1   14.01    4.09
   0   9   1    7.31    2.91
   0  -9   1   10.30    4.45
   0  -9  -1    8.44    3.14
   0  -9  -1   11.00    4.76
   0   9   1    6.14    3.22
   0   9  -1    6.16    3.80
   0  -9   1   11.64    4.77
   0   9   1    8.67    3.00
   0   9  -1   10.19    3.45
   0   9  -1    6.63    2.33
   0  -9   1    7.43    4.08
   0  -9   1   10.35    3.20
   0  -9   1   10.34    4.01
   0   9  -1    8.51    5.14
   0  -9   1    9.73    2.76
   0   9  -1    8.69    1.57
   0   9  -1    8.73    3.71
   0  -9  -1   14.46    4.33
   0  -9  -1    8.64    1.68
   0   9  -1    8.54    3.56
   0  -9  -1    8.55    2.59
   0  -9  -1   10.83    3.16
   0 -10  -1  238.57   13.67
   0  10  -1  178.04   14.39
   0 -10   1  217.95   18.90
   0  10  -1  184.18   16.84
   0  10   1  216.28   19.07
   0 -10  -1  260.54   23.61
   0  10  -1  234.32   19.03
   0 -10  -1  276.94   19.26
   0 -10  -1  248.49   20.66
   0 -10   1  248.96   20.99
   0  10  -1  231.39   13.34
   0 -10   1  278.13   21.06
   0  10   1  234.86   28.43
   0  10   1  218.16   20.14
   0 -10   1  257.96   18.26
   0  10  -1  185.98   13.59
   0  10  -1  145.15   15.84
   0 -10  -1  248.46   16.13
   0  10   1  192.23   15.10
   0 -10  -1  242.24   17.22
   0 -10   1  242.16   16.01
   0 -10  -1  282.94   22.78
   0  10  -1  218.96   18.10
   0  10   1  205.52   16.65
   0  10  -1  204.41   17.10
   0  10   1  236.77   21.97
   0 -10   1  294.07   23.70
   0  10  -1  204.49   26.81
   0  10   1  210.87   16.03
   0  11  -1   63.97    7.73
   0  11   1   54.55    6.04
   0  11  -1   59.13    7.10
   0  11  -1   54.22    7.50
   0  11  -1   94.96    9.52
   0 -11   1   77.19    9.29
   0  11   1   66.12    8.66
   0  11   1   68.10    9.60
   0  11  -1   53.27    5.80
   0 -11   1   74.73    7.22
   0 -11  -1   65.70    4.35
   0  11   1   45.99    4.96
   0  11   1   55.27    6.92
   0 -11   1   85.76   10.05
   0  11  -1   66.64    7.98
   0 -11  -1   78.11    7.46
   0  11  -1   60.36   13.02
   0 -11  -1   69.61    6.46
   0 -11  -1   72.06    8.69
   0  11  -1   64.90    4.24
   0 -11   1   71.56    5.83
   0  11   1   62.09    6.46
   0 -11  -1   73.99    6.06
   0  11   1   63.64    8.67
   0 -11   1   65.03    8.19
   0 -11   1   88.60    8.79
   0  11  -1   52.10    5.33
   0 -11  -1   82.91    9.39
   0 -11  -1   67.77    5.71
   0 -12   1   42.57    7.92
   0 -12  -1   43.64    4.24
   0  12  -1   36.74    9.75
   0  12   1   37.13    4.66
   0 -12   1   43.14    4.10
   0  12  -1   40.15    6.13
   0  12  -1   32.14    5.63
   0  12   1   37.48    7.34
   0 -12   1   51.68    7.51
   0 -12  -1   50.71    6.97
   0 -12  -1   43.42    6.58
   0 -12  -1   40.49    4.54
   0 -12   1   44.95    5.43
   0  12   1   31.36    4.39
   0  12  -1   29.79    4.24
   0  12   1   32.69    5.21
   0  12  -1   35.88    5.77
   0 -12  -1   41.97    4.03
   0 -12   1   37.09    6.08
   0  12  -1   29.83    4.08
   0  12   1   38.75    6.66
   0 -12  -1   37.74    3.01
   0  12  -1   39.17    2.89
   0  12   1   24.62    3.75
   0 -12  -1   47.49    5.45
   0 -12   1   48.21    6.93
   0  12   1   37.58    6.39
   0  12  -1   33.95    5.30
   0  13  -1    1.55    0.78
   0 -13  -1    2.66    2.09
   0  13   1    0.20    1.34
   0  13   1    0.28    1.60
   0 -13  -1    0.59    1.12
   0  13  -1    0.14    1.21
   0  13  -1    0.67    1.67
   0  13   1    0.99    1.68
   0  13   1    1.51    1.92
   0 -13   1    1.01    2.38
   0 -13  -1    0.42    1.60
   0  13   1    0.59    2.13
   0  13  -1    0.24    1.76
   0 -13   1    0.30    1.38
   0 -13  -1    0.71    1.67
   0 -13  -1    0.50    1.34
   0  13  -1    0.18    3.09
   0  13   1    0.63    2.35
   0 -13  -1    5.93    2.37
   0 -13   1    0.24    2.21
   0 -13   1    0.50    1.16
   0  13  -1    0.38    1.99
   0  13  -1    0.18    1.26
   0  13  -1    0.18    1.84
   0 -13   1    0.24    1.93
   0 -13  -1    0.26    2.12
   0 -13  -1    0.57    1.21
   0  13   1    0.01    1.22
   0 -14  -1   78.37    9.13
   0 -14   1   76.44    5.67
   0  14   1   66.31    8.55
   0  14   1   62.86    6.26
   0 -14  -1   82.40    5.22
   0  14  -1   72.95    4.46
   0  14  -1   64.10    8.02
   0  14  -1   51.93    5.56
   0  14   1   66.36    9.00
   0  14  -1   71.29    8.59
   0  14  -1   48.99    5.30
   0 -14  -1   88.28    9.14
   0  14  -1   65.16   12.10
   0  14  -1   61.72    7.04
   0  14   1   64.52    9.48
   0  14   1   56.86    7.23
   0 -14   1   76.95    6.48
   0 -14  -1   84.46    7.47
   0 -14   1   80.67   14.85
   0 -14   1   90.54   10.31
   0 -14   1   73.78    7.97
   0  14   1   82.69    8.08
   0 -14  -1   77.54    5.63
   0 -14  -1   77.84    5.89
   0 -14  -1   72.68    6.20
   0  14  -1   62.28    7.79
   0 -14   1   85.58    9.64
   0 -14  -1   91.50   10.05
   0 -15  -1    1.03    2.21
   0  15  -1    0.80    1.82
   0 -15  -1    1.09    0.95
   0  15  -1    1.08    0.79
   0  15  -1    0.96    2.05
   0  15   1    0.61    2.58
   0 -15  -1    4.21    1.17
   0  15  -1    1.30    2.29
   0 -15  -1    0.79    2.60
   0  15  -1    0.63    2.08
   0  15  -1    0.38    3.25
   0 -15   1    0.53    2.01
   0 -15   1    0.54    1.43
   0  15   1    0.86    2.04
   0 -15   1    1.78    2.72
   0  15   1    0.55    1.87
   0  15   1    0.03    2.43
   0  15   1    7.66    1.75
   0 -15   1    1.32    2.49
   0 -15  -1    0.67    1.30
   0 -15  -1    0.97    2.35
   0 -15  -1    1.24    1.84
   0 -15   1    1.60    1.21
   0 -15  -1    0.82    1.39
   0  15   1    1.46    1.43
   0  15  -1    0.42    1.32
   0  15   1    0.24    1.49
   0  15  -1    1.04    1.43
   0 -15   1    0.46    2.24
   0 -16   1  840.93   69.62
   0 -16  -1  828.11   61.71
   0  16  -1  666.25   59.68
   0  16  -1  651.34   58.46
   0 -16   1  898.57   76.31
   0 -16  -1  922.83   74.78
   0  16  -1  650.16   55.83
   0  16  -1  708.88   73.31
   0 -16   1  785.72   65.99
   0 -16   1  974.82   82.49
   0  16   1  542.82   49.97
   0  16  -1  524.83   44.99
   0 -16   1  787.14   62.01
   0 -16   1  804.74   60.98
   0  16   1  669.29   55.17
   0 -16  -1  775.65   61.57
   0 -16  -1  971.31   81.21
   0 -16  -1  797.08   68.93
   0  16   1  618.23   56.50
   0  16  -1  597.15   49.76
   0  16   1  654.89   60.60
   0  16   1  637.85   60.00
   0  16   1  759.99   63.42
   0  16  -1  731.94   63.56
   0 -16  -1  902.24   71.56
   0  16  -1  596.75   54.12
   0  16  -1  704.55   52.52
   0 -16  -1  879.08   65.39
   0 -16  -1  817.28   62.31
   0  17  -1  221.25   21.20
   0  17   1  193.74   14.90
   0 -17   1  271.43   23.35
   0  17   1  212.17   17.05
   0 -17  -1  239.93   21.30
   0 -17  -1  275.02   21.16
   0  17  -1  198.40   20.01
   0  17  -1  213.15   25.44
   0  17  -1  199.07   18.63
   0  17   1  182.06   18.17
   0 -17  -1  274.72   20.10
   0 -17  -1  254.44   15.73
   0 -17  -1  294.12   24.40
   0 -17   1  243.93   20.47
   0 -17   1  263.76   18.28
   0 -17   1  243.31   15.75
   0  17  -1  182.34   17.82
   0 -17  -1  275.44   20.31
   0  17  -1  197.97   17.03
   0 -17   1  306.17   25.61
   0  17   1  197.98   20.64
   0 -17   1  249.53   19.85
   0  17  -1  178.10   14.27
   0  17   1  191.06   21.24
   0  17  -1  218.28   13.18
   0 -17  -1  234.00   16.80
   0 -17  -1  265.20   17.59
   0 -18   1  420.77   32.60
   0  18   1  327.38   31.83
   0  18  -1  326.86   31.35
   0  18  -1  290.07   22.72
   0  18  -1  365.67   33.69
   0  18  -1  354.22   36.82
   0 -18  -1  418.40   27.27
   0 -18  -1  427.20   27.90
   0  18   1  299.75   28.40
   0  18   1  311.72   31.89
   0 -18   1  405.80   27.36
   0 -18   1  444.72   31.21
   0  18   1  345.03   32.21
   0 -18  -1  460.62   34.20
   0 -18  -1  439.08   30.28
   0 -18  -1  500.32   40.36
   0  18   1  329.86   26.66
   0 -18  -1  395.93   28.73
   0  18  -1  296.49   27.61
   0  18   1  320.11   24.55
   0 -18  -1  410.82   34.61
   0 -18  -1  462.47   35.29
   0 -18   1  400.77   32.77
   0  18  -1  350.13   22.80
   0 -18   1  502.69   41.09
   0  18  -1  363.65   40.07
   0 -18   1  475.59   39.29
   0  18  -1  332.97   29.74
   0 -19  -1  220.75   19.80
   0  19   1  175.46   19.47
   0 -19  -1  221.68   13.43
   0 -19   1  246.93   16.43
   0 -19  -1  223.01   15.86
   0 -19  -1  267.42   22.61
   0 -19  -1  250.07   18.65
   0  19  -1  178.28   10.75
   0  19  -1  143.72   11.30
   0  19  -1  156.58   15.92
   0 -19   1  213.36   13.59
   0  19  -1  194.61   19.48
   0 -19   1  226.42   17.63
   0 -19   1  272.80   23.26
   0  19   1  165.46   19.82
   0 -19  -1  232.25   13.96
   0  19  -1  189.44   23.64
   0  19  -1  181.06   17.85
   0 -19  -1  193.73   13.42
   0 -19   1  223.92   19.31
   0  19   1  184.06   18.60
   0  19   1  159.99   16.82
   0 -19   1  252.48   21.63
   0  19  -1  180.18   19.24
   0  19   1  180.55   13.65
   0  19   1  165.03   13.68
   0  19  -1  194.44   16.13
   0  20  -1    0.28    3.45
   0 -20   1    4.68    2.37
   0 -20   1    2.45    2.01
   0  20  -1    1.34    2.78
   0 -20  -1    1.45    2.12
   0 -20  -1    0.75    1.00
   0 -20  -1    2.05    2.80
   0  20   1    1.47    1.47
   0  20  -1    2.42    1.89
   0 -20  -1    1.78    2.64
   0 -20   1    1.78    3.05
   0 -20  -1    0.37    1.43
   0 -20  -1    3.01    2.37
   0  20  -1    2.17    3.20
   0  20   1    1.99    3.28
   0  20   1    1.50    3.12
   0  20  -1    1.83    2.26
   0 -20   1    3.06    1.49
   0 -20   1    1.45    1.13
   0  20  -1    0.82    2.39
   0  20   1    1.50    2.35
   0 -20   1    1.88    2.78
   0  20  -1    2.01    1.24
   0  20   1    1.32    2.60
   0  20   1    1.64    1.35
   0 -21  -1  825.45   74.66
   0  21   1  618.10   62.92
   0  21  -1  699.49   67.41
   0 -21  -1  987.18   85.22
   0  21   1  661.95   63.86
   0 -21  -1  784.86   63.72
   0  21   1  644.99   54.23
   0  21  -1  505.52   43.38
   0  21   1  581.55   57.14
   0 -21  -1  797.29   60.36
   0  21  -1  651.62   61.97
   0 -21   1  734.67   57.48
   0 -21   1  783.90   69.12
   0  21  -1  684.78   73.65
   0 -21   1  810.35   63.57
   0 -21  -1  851.34   66.51
   0  21  -1  659.14   66.05
   0  21   1  836.20   74.45
   0 -21   1  877.00   74.86
   0  21  -1  721.74   62.52
   0  21  -1  570.89   55.00
   0 -21   1 1007.37   89.08
   0 -21  -1  917.63   75.94
   0 -21   1  941.12   82.62
   0  21   1  603.06   63.32
   0  22   1    1.54    5.16
   0  22   1    0.04    3.01
   0  22  -1    0.63    2.97
   0  22  -1    1.33    1.84
   0 -22  -1    1.26    2.14
   0 -22   1    0.83    1.04
   0 -22  -1    1.63    2.92
   0 -22   1    0.78    1.99
   0 -22   1    1.34    2.35
   0 -22  -1    0.84    2.78
   0  22  -1    0.53    2.51
   0 -22   1    1.58    3.18
   0 -22  -1    0.72    1.32
   0 -22   1    1.07    1.32
   0  22   1    8.83    2.10
   0  22  -1    9.71    2.00
   0  22  -1    0.32    4.12
   0  22   1    0.84    1.22
   0  22   1    0.28    3.35
   0 -22   1    1.92    2.91
   0  22   1    1.38    2.76
   0  22   1    0.72    2.49
   0 -23  -1   51.58    7.04
   0  23   1   26.10    8.97
   0 -23   1   45.74    4.31
   0  23  -1   38.53    5.50
   0  23   1   29.46    7.04
   0 -23   1   44.96    7.21
   0  23  -1   44.74   10.43
   0  23   1   33.40   14.94
   0 -23   1   43.80    5.93
   0 -23   1   54.79    8.64
   0 -23  -1   61.71    8.93
   0 -23  -1   45.22    4.56
   0  23  -1   34.11    7.51
   0 -23  -1   45.78    8.09
   0  23   1   43.16   10.02
   0 -23   1   59.48    9.84
   0  23  -1   33.77    8.31
   0  23   1   38.36    4.13
   0  23   1   46.31    8.43
   0  24  -1   64.72    7.08
   0  24  -1   62.35   10.08
   0  24   1   47.13   18.13
   0  24   1   48.87    8.47
   0 -24  -1   74.07   10.17
   0  24   1   58.56   12.98
   0 -24   1   73.96    5.91
   0  24   1   51.83   11.90
   0 -24   1   72.03    9.05
   0  24  -1   59.61   10.94
   0 -24  -1   72.31    6.22
   0  24  -1   52.44   12.94
   0 -24   1   78.52    8.08
   0  24   1   71.14   10.84
   0  24   1   60.19    7.72
   0  25   1   -0.45    3.66
   0 -25   1   -0.07    1.60
   0  25  -1    0.80    1.85
   0  25  -1    0.33    2.13
   0  25   1   -1.74    5.37
   0  25  -1    0.24    1.17
   0  25  -1    0.09    2.78
   0  25   1   -0.61    0.89
   0  25   1    0.47    1.63
   0 -25   1    0.92    1.34
   0  25   1   -0.45    4.26
   0 -25  -1    0.00    1.84
   0  26  -1   25.40    8.91
   0 -26  -1   19.69    5.80
   0 -26   1   21.95    5.33
   0  26   1   22.24    9.09
   0  26  -1   17.72    3.74
   0  26  -1   19.09    6.72
   0  26   1   12.88    5.17
   0  26  -1   17.11    5.77
   0  26   1   24.82    9.92
   0  27  -1    3.04    3.88
   0  27  -1    2.41    3.20
   0 -27   1    2.81    2.89
   0  27  -1    2.03    1.82
   0  27   1    2.41    5.59
   0  27   1    1.59    5.17
   0 -27  -1    2.24    3.22
   0  27  -1    2.50    4.96
   0  28   1    6.01    7.46
   0  28  -1    4.55    5.02
   0  28   1    4.85    7.16
   0  28  -1    7.52    6.76
   0 -28   1    8.10    3.83
   0  28  -1    6.60    4.56
   0 -28  -1    7.64    4.37
   0  29  -1   37.79   11.85
   0  29  -1   25.90    9.05
   0  29  -1   32.16    8.25
   0  29   1   31.74   13.44
   0 -29   1   40.83    7.46
   0 -29  -1   38.19    7.96
   0  29   1   32.99   12.44
   0 -30  -1   -1.09    3.06
   0  30  -1    3.04    3.14
   0  30   1   -6.17    5.83
   0  30  -1    3.22    4.76
   0 -30  -1    3.03    2.97
   0 -30   1    2.38    2.64
   0  30  -1    3.55    8.17
   0  30   1    3.10    5.08
   0 -31   1   10.46    4.37
   0  31  -1    8.93    6.67
   0  31  -1    6.27    4.58
   0 -31  -1   11.35    4.66
   0  31  -1    7.55    6.42
   0 -31  -1    8.68    4.34
   0  31   1    6.10    6.89
   0  32  -1    5.84    5.89
   0 -32   1    6.98    3.78
   0 -32  -1    7.14    4.21
   0  32   1    3.41    6.02
   0  32  -1    4.25    5.70
   0  32  -1    3.72    3.95
   0 -32  -1    5.04    7.21
   0  33   1   11.77    8.71
   0 -33   1   20.53    5.92
   0  33  -1   13.38    5.70
   0 -33  -1   25.82    6.68
   0 -33  -1   21.26    6.37
   0  33  -1   19.68    8.60
   0  33  -1   -0.11    8.58
   0 -34   1   41.65    8.84
   0  34  -1   37.23   12.48
   0 -34  -1   42.92    9.43
   0  34  -1   32.27    8.47
   0 -34  -1   51.17   10.31
   0  34   1   42.75   12.19
   0  34  -1   45.92   12.73
   0  35  -1   24.44    8.10
   0 -35  -1    0.09    5.92
   0 -35   1   16.96    5.39
   0  35   1    0.03    7.81
   0  35  -1    0.05    8.23
   0  35   1   -0.08    8.66
   0 -35  -1   18.48    6.14
   0  36  -1   -1.09    6.62
   0  36  -1   -0.01    4.16
   0  36   1   -0.14    3.79
   0 -36  -1    0.14    3.14
   0 -36   1    0.08    2.58
   0  36   1   -0.12    4.24
   0 -36  -1    1.57    2.81
   0 -37  -1   -0.18    5.70
   0  37  -1   12.51    7.85
   0  37   1    0.18    8.71
   0 -37  -1    8.39    4.99
   0 -37   1   11.22    5.39
   0  37  -1   -0.05    7.26
   0 -37   1   -0.47    4.79
   0  37   1   -0.24    7.31
   0  38   1    0.24    9.05
   0 -38   1    7.80    6.59
   0  38  -1    7.97    9.35
   0  38   1   -0.03   10.65
   0 -38  -1    5.25    5.95
   0 -38   1   22.77    5.64
   0 -38  -1    0.14    6.72
   0  38  -1    0.05    8.66
   0 -39  -1    2.80    4.41
   0  39   1    0.03    7.72
   0  39   1   -0.01    6.50
   0 -39   1   -0.47    4.99
   0  39  -1    3.47    6.35
   0 -39  -1   -0.45    4.04
   0 -39   1    7.09    3.80
   0  39  -1   -0.91    6.80
   0 -40  -1   -0.05    3.30
   0  40  -1    2.32    5.97
   0 -40  -1   -0.37    3.92
   0 -40   1   -6.63    3.13
   0 -40   1   -0.42    4.51
   0  40   1   -1.66    8.63
   0  40   1    4.49    5.97
   0  40  -1    1.74    6.29
   0 -41   1    5.81    9.26
   0  41   1   16.80   11.75
   0  41  -1   48.92   15.13
   0 -41  -1   17.55    7.80
   0  41   1    9.62   17.15
   0  41  -1   10.48   11.90
   0  42  -1    1.83    7.89
   0  42   1    7.48    6.79
   0  42   1  -12.98   10.12
   0  42  -1    1.04    5.74
   0   0  -2 3477.58  450.06
   0   0  -2 3515.76  451.56
   0   0  -2 3685.40  480.01
   0   0   2 3463.23  452.21
   0   0   2 3277.92  426.10
   0   0   2 3315.44  429.11
   0   0  -2 4113.58  541.22
   0   0  -2 3630.02  449.21
   0   0   2 4187.69  554.45
   0   1  -2  519.40   52.02
   0  -1  -2  475.49   37.83
   0   1  -2  521.07   47.71
   0  -1  -2  467.52   32.20
   0  -1   2  493.34   45.91
   0  -1  -2  537.82   50.91
   0   1  -2  487.09   41.32
   0  -1  -2  500.43   46.76
   0   1   2  452.39   26.32
   0  -1  -2  470.66   40.59
   0  -1   2  419.16   38.29
   0   1   2  476.96   44.54
   0  -1   2  489.02   45.66
   0   1  -2  477.49   35.56
   0   1  -2  520.37   46.64
   0   1   2  535.50   46.83
   0  -1  -2  515.28   46.71
   0  -1   2  407.42   39.88
   0   1   2  458.76   40.61
   0  -2  -2 5812.14  816.11
   0   2  -2 5083.06  755.82
   0   2  -2 5229.54  734.02
   0   2   2 4818.31  651.42
   0   2  -2 4833.54  700.10
   0   2   2 4990.26  719.77
   0  -2  -2 4831.66  690.63
   0  -2  -2 5077.68  730.92
   0   2   2 4744.66  677.74
   0   2  -2 5079.97  731.36
   0   2  -2 5071.14  678.35
   0  -2   2 3657.82  543.44
   0  -2   2 4633.98  666.71
   0  -2  -2 5583.41  804.99
   0   2   2 4726.60  679.30
   0  -2  -2 4861.80  695.16
   0  -2   2 4799.09  697.08
   0   2  -2 4866.74  686.19
   0  -2  -2 5270.32  721.44
   0  -2   2 4889.82  708.23
   0   2  -2 4672.13  692.04
   0  -2  -2 5462.62  824.49
   0   3  -2  585.13   64.73
   0   3   2  596.58   50.64
   0   3  -2  554.65   35.21
   0  -3  -2  562.28   37.66
   0  -3  -2  615.22   56.35
   0  -3   2  653.26   54.79
   0  -3   2  595.95   56.38
   0   3   2  563.55   50.01
   0   3   2  534.23   45.83
   0  -3  -2  584.68   52.89
   0  -3   2  566.11   50.76
   0   3  -2  521.87   34.34
   0   3  -2  612.20   50.02
   0  -3  -2  701.72   64.10
   0  -3  -2  591.07   51.27
   0  -3  -2  571.87   39.97
   0   3  -2  555.85   47.38
   0   3   2  580.46   51.97
   0  -3   2  577.27   54.68
   0   3  -2  533.62   47.31
   0   3  -2  627.76   50.60
   0   3  -2  611.95   57.32
   0  -3  -2  571.71   45.88
   0   3   2  543.76   37.53
   0  -3  -2  622.80   57.15
   0   4   2 2426.41  272.98
   0  -4   2 2310.28  271.02
   0  -4   2 2413.02  292.73
   0  -4  -2 2663.70  304.61
   0  -4  -2 2665.26  273.00
   0  -4  -2 2504.40  259.53
   0  -4  -2 2519.10  284.90
   0  -4  -2 2785.11  306.03
   0  -4  -2 2575.82  294.58
   0   4  -2 2359.17  270.58
   0   4   2 2456.94  262.34
   0  -4   2 2520.64  295.31
   0   4   2 2441.01  283.34
   0   4  -2 2206.95  229.21
   0   4  -2 2506.49  292.02
   0   4  -2 2458.72  258.29
   0   4  -2 2438.61  275.38
   0   4  -2 2627.81  292.56
   0   4  -2 2557.61  284.19
   0   4   2 2434.54  279.64
   0  -4   2 2404.79  275.55
   0  -4  -2 3136.09  357.43
   0  -4   2 1660.53  210.41
   0  -4  -2 2565.52  296.25
   0   4   2 1941.47  220.24
   0  -5  -2  524.92   45.83
   0   5  -2  482.84   43.89
   0  -5  -2  496.78   29.45
   0   5   2  530.34   46.66
   0  -5   2  468.99   44.51
   0   5  -2  528.30   43.82
   0   5   2  511.81   37.30
   0   5  -2  533.06   46.64
   0  -5  -2  562.65   51.00
   0  -5  -2  674.92   59.07
   0  -5  -2  616.22   48.43
   0   5   2  422.14   35.91
   0  -5   2  514.92   44.80
   0  -5   2  563.49   52.98
   0   5  -2  500.51   38.91
   0   5  -2  443.76   28.98
   0  -5   2  508.77   44.00
   0  -5  -2  578.56   51.85
   0  -5   2  538.11   71.10
   0   5  -2  507.56   34.83
   0  -5  -2  527.63   44.46
   0   5   2  516.11   41.76
   0   5   2  551.12   51.47
   0   5  -2  557.87   45.50
   0  -6  -2  128.29   12.34
   0  -6   2  137.06   10.42
   0  -6   2  120.71   14.02
   0  -6  -2  120.32   14.04
   0   6  -2  115.04   10.81
   0   6  -2  121.86    8.59
   0  -6  -2  143.51   16.89
   0  -6  -2  155.22   14.00
   0  -6   2  131.89   17.38
   0   6   2  122.75   10.09
   0  -6  -2  124.25   13.10
   0  -6   2  117.69   26.61
   0   6   2  116.40   13.80
   0  -6   2  104.48   14.65
   0  -6   2  116.23   12.97
   0   6   2  113.47   10.42
   0   6  -2  118.66   12.30
   0   6  -2  117.33   20.22
   0  -6  -2  121.28   12.84
   0  -6  -2  130.63   16.00
   0   6  -2  109.28    6.55
   0   6   2   94.70   10.68
   0   6  -2  108.52   13.57
   0   6   2  130.93   17.99
   0   6  -2  126.28   14.05
   0   7  -2 1413.71  134.80
   0  -7   2 1278.05  130.79
   0   7   2 1453.05  135.67
   0   7  -2 1402.13  134.37
   0   7  -2 1346.82  131.11
   0   7  -2 1403.33  128.20
   0  -7  -2 1542.52  153.48
   0   7  -2 1265.46  112.93
   0  -7  -2 1796.27  168.49
   0  -7   2 1332.73  129.76
   0  -7   2 1415.43  140.46
   0  -7  -2 1437.09  138.18
   0   7   2 1175.22  115.58
   0  -7   2 1387.61  159.60
   0  -7  -2 1484.22  145.19
   0   7  -2 1430.29  125.62
   0  -7  -2 1678.55  165.58
   0  -7  -2 1548.39  147.71
   0   7  -2 1337.01  134.99
   0  -7   2 1403.64  135.49
   0   7   2 1643.94  166.80
   0   7   2 1368.97  129.66
   0  -7  -2 1472.41  139.09
   0   7   2 1456.02  143.98
   0   7  -2 1245.76  122.71
   0  -7   2 1518.17  172.45
   0   8  -2  118.45    7.37
   0   8  -2  114.19   11.71
   0   8  -2  131.30   11.65
   0   8   2  109.24   11.02
   0   8  -2  126.17   12.50
   0  -8   2  117.21   13.97
   0   8   2  147.88   17.90
   0  -8   2  122.02   16.59
   0   8  -2  137.31    9.85
   0   8   2  134.74   10.92
   0   8  -2  127.58   11.25
   0  -8  -2  162.73   16.57
   0  -8   2  129.90   14.73
   0   8   2  123.75   10.17
   0  -8  -2  143.85   13.85
   0  -8   2  129.75   13.85
   0  -8  -2  132.41   21.80
   0   8  -2  119.60   13.50
   0  -8  -2  138.45   12.08
   0  -8  -2  156.43   13.05
   0  -8   2  143.54   22.48
   0   8   2  123.61   12.69
   0  -8   2  133.66    9.41
   0   8  -2  114.68    6.37
   0  -8  -2  141.92   11.67
   0   9   2  120.54    9.85
   0   9  -2  117.87   12.09
   0   9  -2  108.38    5.87
   0   9   2  148.92   27.79
   0   9   2  136.74   11.09
   0  -9   2  119.62   10.13
   0  -9   2  125.76   14.06
   0   9  -2  117.50   11.51
   0  -9  -2  143.58   11.27
   0  -9   2  161.27   21.41
   0   9  -2  127.25   10.79
   0   9  -2  133.53    9.80
   0  -9   2  132.96   13.84
   0   9  -2  135.43   11.86
   0  -9  -2  165.96   12.81
   0  -9  -2  161.92   15.93
   0  -9  -2  142.67   11.56
   0  -9   2  142.72    9.71
   0  -9  -2  133.37   13.35
   0   9   2  122.52   12.59
   0   9  -2  115.12    7.35
   0  -9  -2  144.60   13.22
   0  -9   2  135.58   14.64
   0   9  -2  124.17   12.06
   0   9   2  111.52   10.71
   0  10  -2   50.93    7.18
   0  10  -2   52.63    7.13
   0 -10  -2   63.69    6.66
   0  10  -2   63.80    7.31
   0 -10   2   48.41    7.58
   0  10  -2   57.15    3.29
   0 -10  -2   62.80    6.18
   0 -10  -2   63.52    6.60
   0 -10  -2   75.00    8.27
   0 -10   2   61.35    8.97
   0 -10   2   90.29   15.01
   0 -10  -2   62.14    8.41
   0  10   2   58.98    6.68
   0  10  -2   57.44    6.23
   0 -10   2   59.88    6.14
   0  10   2   53.64    5.66
   0 -10  -2   74.71   10.12
   0 -10  -2   66.66    6.56
   0  10  -2   60.03    5.91
   0  10   2   49.20    6.39
   0  10   2   48.75    8.30
   0  10  -2   56.23    7.51
   0 -10   2   69.29    5.71
   0  10   2   58.90    8.10
   0  10  -2   51.73    4.16
   0 -10   2   64.94    9.47
   0  11  -2   25.30    5.01
   0 -11  -2   30.82    4.50
   0  11   2   28.90    4.79
   0  11  -2   29.82    9.01
   0 -11   2   31.92    7.01
   0 -11  -2   30.57    4.41
   0  11   2   27.70    5.77
   0  11  -2   26.83    5.29
   0 -11   2   35.53    4.00
   0 -11  -2   29.70    6.00
   0 -11   2   26.26    5.50
   0 -11  -2   32.78    4.50
   0  11  -2   29.77    2.95
   0  11  -2   32.32    4.34
   0  11   2   24.16    4.55
   0 -11  -2   29.08    0.95
   0 -11   2   32.98   12.60
   0  11  -2   22.93    5.01
   0  11  -2   29.15    4.13
   0  11  -2   24.82    1.54
   0  11   2   23.82    6.10
   0 -11   2   39.91    7.05
   0 -11  -2   42.25    7.23
   0 -11  -2   36.62    5.87
   0 -11   2   29.79    4.05
   0  11   2   28.86    4.22
   0 -11  -2   31.83    4.41
   0 -12  -2    7.47    4.18
   0 -12  -2    6.97    2.45
   0 -12   2    7.25    2.37
   0 -12   2    5.49    3.30
   0  12  -2    3.76    3.08
   0 -12   2   10.93    4.26
   0  12   2    4.87    3.43
   0  12   2    4.81    2.68
   0 -12  -2    9.27    2.50
   0  12  -2    5.13    1.67
   0  12  -2    6.97    3.28
   0 -12  -2    0.13    3.29
   0  12   2    6.56    3.68
   0  12   2    5.54    2.30
   0  12  -2    5.29    3.06
   0 -12  -2    7.70    3.60
   0 -12   2    5.17    4.08
   0 -12  -2    6.09    0.43
   0  12   2    7.20    2.93
   0  12  -2    5.96    0.70
   0 -12  -2    6.18    2.43
   0 -12  -2    8.16    2.55
   0  12  -2    5.17    4.51
   0 -12   2    5.75    2.26
   0  12  -2    4.24    3.84
   0  12  -2    6.85    2.67
   0 -13  -2  922.59   68.86
   0 -13   2 1072.53   89.95
   0  13  -2  801.28   68.85
   0 -13   2 1139.16   95.52
   0  13  -2  928.48   85.15
   0 -13  -2 1023.48   93.54
   0  13   2  945.35   85.87
   0 -13   2 1147.94  102.35
   0 -13   2 1195.88  109.28
   0  13   2  961.46   88.89
   0  13  -2  987.26   87.29
   0  13  -2  943.02   72.49
   0 -13  -2 1149.97   96.43
   0 -13  -2 1177.78   99.26
   0  13  -2  889.55   82.15
   0  13  -2  867.28   78.69
   0 -13   2 1149.26  105.99
   0  13   2  895.40   85.45
   0  13  -2  958.78   83.50
   0 -13  -2 1099.79   93.75
   0  13  -2  855.20   81.08
   0  13   2  990.25   86.00
   0  13   2  823.19   75.28
   0 -13  -2 1157.52  105.42
   0 -13  -2 1102.15   92.91
   0 -14   2  951.74   79.08
   0  14  -2  663.33   57.92
   0 -14   2  844.34   84.87
   0 -14  -2  881.22   69.15
   0  14   2  675.38   59.88
   0  14   2  721.66   59.96
   0  14  -2  691.53   61.36
   0  14  -2  680.32   60.63
   0 -14  -2  851.06   66.55
   0 -14   2  904.71   79.87
   0 -14  -2  938.74   74.07
   0 -14   2  888.52   78.20
   0 -14   2  911.33   71.60
   0 -14  -2  774.27   68.19
   0  14   2  734.40   65.61
   0  14   2  589.61   52.12
   0 -14  -2  810.32   65.31
   0  14  -2  805.36   56.38
   0  14   2  659.37   61.77
   0  14  -2  583.55   47.75
   0  14  -2  723.52   62.17
   0 -14  -2  749.79   51.59
   0 -14  -2  885.09   76.71
   0  14  -2  681.69   56.76
   0  14  -2  606.46   55.93
   0 -14   2  819.71   64.28
   0  15  -2   75.78    8.91
   0  15   2   77.29    7.38
   0 -15   2  109.95    9.93
   0 -15  -2   87.34    6.58
   0  15  -2   75.62    9.23
   0  15  -2   76.50    9.51
   0  15   2   65.31    7.48
   0  15   2   73.64    9.19
   0 -15   2   98.44   11.67
   0 -15  -2   96.58   11.43
   0 -15  -2   90.01    7.66
   0  15  -2   60.28    5.67
   0 -15  -2   84.47   10.40
   0 -15  -2   94.97    7.56
   0 -15   2   88.95    7.00
   0 -15   2  101.13   12.47
   0  15  -2   70.01    7.91
   0 -15  -2  103.92    8.58
   0  15   2   69.15   10.96
   0  15  -2   77.23    7.14
   0  15  -2   86.91    4.01
   0 -15  -2   79.55    3.50
   0 -15   2  102.30   17.46
   0  15  -2  108.09   10.68
   0 -16  -2  189.42   13.89
   0  16  -2  142.15   14.10
   0  16   2  142.93   11.38
   0 -16  -2  171.16   11.17
   0  16  -2  150.68    7.34
   0 -16   2  223.92   22.70
   0 -16  -2  180.91   16.90
   0 -16  -2  161.66   16.03
   0 -16  -2  175.96   12.44
   0 -16   2  288.68   28.25
   0  16  -2  130.36   12.65
   0  16   2  138.29   18.01
   0  16   2  134.12   13.97
   0 -16  -2  163.21   12.29
   0  16  -2  143.22   11.52
   0 -16   2  197.90   19.17
   0 -16   2  181.54   17.34
   0  16  -2  141.89   14.06
   0  16  -2  141.58   14.00
   0 -16   2  161.12   11.44
   0  16   2  133.53   16.61
   0 -17   2    3.20    3.41
   0 -17   2    1.95    2.92
   0  17   2    1.46    1.76
   0 -17  -2    1.91    1.64
   0 -17  -2    2.47    1.88
   0  17  -2    2.21    2.55
   0 -17  -2    1.72    1.21
   0 -17   2    1.70    1.41
   0  17  -2    2.54    2.43
   0  17  -2    1.05    3.47
   0 -17  -2    1.62    2.79
   0  17   2    2.09    3.34
   0  17   2    1.51    2.62
   0  17   2    0.53    3.04
   0 -17  -2    2.33    1.54
   0 -17   2    2.13    4.93
   0  17  -2    1.58    2.34
   0 -17   2    1.91    1.71
   0 -17  -2    2.84    3.24
   0  17  -2    1.96    1.53
   0  18  -2  170.53   17.30
   0 -18   2  221.62   19.81
   0  18   2  157.81   17.07
   0 -18   2  208.28   15.50
   0  18  -2  156.60   12.60
   0  18   2  159.82   13.63
   0 -18   2  222.55   21.53
   0 -18  -2  195.84   14.54
   0  18   2  221.28   17.26
   0 -18   2  220.80   27.86
   0 -18  -2  196.13   19.03
   0 -18  -2  228.90   16.71
   0  18   2  279.24   34.90
   0  18  -2  195.49   18.11
   0 -18   2  199.51   17.44
   0 -18  -2  216.72   13.71
   0  18  -2  177.81   17.03
   0 -18  -2  252.69   22.40
   0  18  -2  155.41   20.45
   0  18  -2  172.79   17.40
   0 -18  -2  220.55   15.51
   0 -18   2  194.85   13.73
   0 -19   2  149.53   14.25
   0 -19  -2  151.85   11.17
   0  19   2  110.97    9.96
   0 -19  -2  174.95   16.89
   0  19   2  149.53   12.18
   0  19  -2  115.73   13.31
   0 -19   2  133.84   12.89
   0 -19   2  142.81   10.96
   0 -19  -2  129.95   10.29
   0 -19  -2  161.50   12.44
   0  19   2  150.49   32.58
   0  19  -2  121.42   12.93
   0  19   2  107.88   13.55
   0 -19  -2  136.67   14.94
   0 -19   2  149.18   21.38
   0  19  -2  127.26   19.39
   0 -19  -2  151.43    9.51
   0  19  -2  121.29   13.64
   0  19  -2  126.96   13.61
   0 -19   2  153.98   16.97
   0  19  -2  112.20   13.30
   0 -19   2  111.32    8.94
   0  20   2   19.73    8.73
   0 -20   2   29.39   10.52
   0  20  -2   20.45    4.71
   0  20  -2   19.81    5.08
   0 -20   2   26.76    6.81
   0  20   2   20.23    3.64
   0 -20  -2   18.30    3.13
   0 -20   2   16.86    4.45
   0 -20  -2   24.31    2.55
   0 -20  -2   25.82    3.51
   0  20   2    1.26   12.58
   0  20   2   18.81    6.06
   0  20  -2   23.24    9.58
   0 -20   2   23.45    5.25
   0 -20  -2   22.32    5.93
   0 -20  -2   26.03    4.14
   0  20  -2   18.67    3.16
   0 -20   2   23.60    5.02
   0 -20   2   22.15    3.37
   0  20  -2   18.15    5.30
   0  20   2   18.18    3.37
   0 -20  -2   29.20    6.46
   0  21   2   -0.13    2.93
   0  21  -2    0.71    1.53
   0  21  -2   -0.34    0.99
   0  21  -2   -0.13    1.62
   0 -21   2    0.14    1.51
   0 -21  -2    0.26    1.25
   0 -21  -2   -0.04    1.10
   0 -21  -2    0.22    0.93
   0 -21   2    0.37    0.91
   0  21   2   -0.18    1.01
   0  21  -2    0.13    0.88
   0 -21   2   -0.58    2.28
   0 -21   2    0.00    1.67
   0  21  -2   -0.04    1.68
   0 -21  -2    0.37    2.07
   0 -21   2    0.09    1.46
   0 -21  -2    0.08    1.87
   0 -21   2   -0.43    1.84
   0  21  -2   -0.64    1.68
   0 -21  -2   -0.03    0.88
   0  21   2    0.16    4.31
   0  21   2    0.70    1.01
   0  22   2    1.68    3.91
   0 -22  -2    2.58    2.22
   0  22   2    3.25    1.76
   0 -22   2    3.51    3.31
   0 -22   2    3.89    1.66
   0  22  -2    2.57    2.78
   0 -22  -2    0.66    2.85
   0 -22  -2    4.83    3.71
   0  22   2    2.66    1.76
   0  22  -2    2.72    2.76
   0 -22   2    2.39    1.43
   0 -22  -2    3.91    3.37
   0  22  -2    2.60    1.76
   0  22  -2    2.84    3.08
   0 -22   2    4.17    4.13
   0 -22  -2    2.97    1.68
   0 -22   2    3.26    2.75
   0  22  -2    1.55    3.80
   0  22   2    1.22    7.91
   0  22  -2    3.64    2.74
   0  22  -2    2.29    1.47
   0 -22   2    3.50    2.89
   0  23   2    4.04    1.93
   0  23  -2    2.50    8.46
   0 -23   2    5.00    3.17
   0  23   2    0.87    4.37
   0 -23   2    4.39    1.76
   0  23   2    2.55    1.84
   0  23  -2    4.63    2.97
   0 -23  -2    4.77    3.24
   0 -23  -2    5.63    2.58
   0 -23  -2    3.22    1.79
   0  23  -2    3.35    3.14
   0  23  -2    3.49    3.37
   0 -23  -2    4.83    3.54
   0 -23   2    3.64    2.96
   0  23   2    1.32    8.79
   0  24  -2   16.46    7.00
   0  24   2   18.67    7.63
   0  24  -2   14.61    5.00
   0 -24  -2   15.02    2.93
   0  24  -2   18.69    4.72
   0  24  -2   14.89    5.43
   0 -24   2   19.65    5.00
   0  24   2   12.94    2.89
   0 -24  -2   18.85    5.64
   0  24   2    9.19   13.42
   0 -24  -2   19.98    4.96
   0 -24   2   16.78    4.64
   0  25  -2   32.36    9.37
   0  25   2   33.74   10.19
   0  25  -2   30.39    6.01
   0  25  -2   26.35    7.31
   0 -25  -2   33.81    7.50
   0  25  -2   25.99    6.88
   0 -25  -2   37.95    6.79
   0  25   2   11.56   16.72
   0 -25   2   33.31    6.27
   0  26   2   46.54   24.86
   0  26  -2   72.41   13.79
   0  26  -2   58.51   11.30
   0 -26   2   72.41    9.87
   0 -26  -2   69.68   11.08
   0  26  -2   69.24   11.94
   0 -26  -2   83.47   11.22
   0  26   2   66.18   14.63
   0  26  -2   65.47    8.79
   0  27   2    5.35   13.30
   0 -27  -2   17.14   10.76
   0  27  -2   11.30    5.74
   0  27  -2   15.50    7.56
   0 -27  -2   17.26    5.45
   0  27  -2   13.01    4.01
   0 -27   2   13.47    4.55
   0  27  -2   13.76    5.85
   0  27   2   10.52    7.96
   0  28  -2    0.96    2.57
   0  28   2    2.24    5.97
   0  28  -2    0.37    2.60
   0 -28  -2    1.30    2.74
   0 -28  -2    1.60    2.29
   0 -28   2    1.49    3.59
   0  28  -2    0.34    3.47
   0  28  -2   -0.63    1.78
   0  28   2    0.26    3.64
   0  28   2   -3.62    4.28
   0  29  -2    8.55    5.50
   0 -29  -2   13.84    5.05
   0  29  -2   10.72    3.59
   0  29   2    9.09    7.92
   0  29  -2   12.61    5.58
   0  29  -2   13.65    7.46
   0 -29   2   15.82    4.74
   0  29   2   11.94    8.97
   0 -29  -2   14.98    5.97
   0 -30   2   38.30    6.92
   0  30   2   27.58   11.51
   0 -30  -2   37.23    7.29
   0  30  -2   25.12    4.95
   0  30   2   32.23   10.58
   0  30  -2   30.08    7.80
   0 -30  -2   38.48    8.41
   0  30  -2   23.35    7.56
   0  30  -2   37.15   10.09
   0  31   2   -1.58    3.60
   0 -31   2    0.30    1.93
   0  31  -2    0.92    3.00
   0  31   2   -0.42    3.24
   0 -31  -2    1.10    2.43
   0  31  -2    0.34    2.33
   0 -31  -2   -0.26    2.03
   0  31  -2    1.38    3.06
   0 -32  -2   48.66   10.00
   0 -32   2   50.96    8.52
   0  32  -2   39.36    9.52
   0  32  -2   42.97   11.86
   0  32   2   43.57   11.90
   0  32   2   34.83   13.56
   0  32  -2   35.56   11.25
   0 -32  -2   45.41    8.69
   0 -33  -2    6.76    3.16
   0  33   2    0.24    5.16
   0  33  -2   -0.04    4.47
   0 -33  -2   -0.14    3.78
   0  33   2   -0.07    4.64
   0  33  -2    0.39    3.46
   0  33  -2    7.52    4.63
   0 -33   2   -0.03    3.12
   0  34   2   64.11   13.56
   0 -34  -2   63.03   12.09
   0  34  -2   49.29   11.14
   0  34  -2   46.72   13.71
   0 -34   2   55.71   10.09
   0 -34  -2   54.08   11.72
   0  34  -2   68.95   14.34
   0  34   2   46.09   15.28
   0 -35   2   49.72    9.54
   0 -35  -2   60.35   11.81
   0  35   2   43.00   15.13
   0  35  -2   63.63   22.43
   0  35  -2   41.38   13.15
   0  35  -2   42.82   10.62
   0 -35  -2   34.95   10.47
   0  36  -2    0.43    4.63
   0  36   2   -0.04    4.37
   0 -36  -2    0.46    3.99
   0 -36   2   -0.18    3.17
   0  36  -2    0.13    3.66
   0  36  -2    9.35    4.50
   0  36   2   -0.08    5.41
   0  37  -2    1.16    3.24
   0  37   2   -0.29    4.79
   0 -37  -2    0.26    2.88
   0 -37  -2   -0.12    2.26
   0 -37   2    0.01    2.09
   0  37   2   -0.07    3.29
   0  37  -2   -0.07    3.33
   0  38   2   -1.17   14.09
   0 -38  -2   26.68    7.02
   0 -38   2   16.11    5.26
   0 -38  -2    4.26    5.51
   0  38  -2    5.29    7.93
   0  38   2    0.05    7.92
   0  38  -2    4.70    8.16
   0 -39  -2    3.34    5.56
   0  39   2    0.49   15.35
   0 -39  -2   21.35    8.08
   0 -39   2   24.78    5.42
   0  39   2   33.98    9.27
   0  39  -2    2.87    8.93
   0  39  -2   -5.88    9.34
   0  40  -2   -0.80    3.68
   0 -40  -2   -7.42    6.47
   0  40  -2    0.38    3.49
   0  40   2    0.55    3.64
   0  40   2    7.33    6.18
   0 -41  -2    3.33    5.09
   0 -41   2    6.96    5.81
   0  41   2   -4.26    6.02
   0  41   2    2.32   10.08
   0  41  -2    6.42    7.54
   0  41  -2   -0.22    5.77
   0   0   3    1.04    6.41
   0   0  -3    7.39    1.93
   0   0  -3    0.49    3.58
   0   0  -3    1.17    3.38
   0   0  -3    0.45    5.55
   0   0   3   -0.12    3.68
   0   0   3    0.57    3.78
   0   0  -3    1.63    4.35
   0   0   3    1.30    4.01
   0  -1   3  442.81   51.72
   0   1  -3  433.75   38.42
   0  -1   3  411.85   38.19
   0  -1   3  380.75   37.84
   0  -1  -3  457.95   43.05
   0  -1   3  385.74   35.96
   0  -1  -3  482.93   32.11
   0   1   3  418.72   38.69
   0   1  -3  470.60   49.97
   0  -1  -3  520.90   51.98
   0   1  -3  495.42   34.79
   0   1   3  480.72   56.58
   0  -1  -3  428.28   38.71
   0  -1  -3  442.87   37.74
   0  -1  -3  457.26   34.92
   0   1   3  354.80   31.94
   0   1  -3  455.90   38.78
   0   1   3  418.47   39.24
   0   1  -3  473.05   59.96
   0   2  -3 1603.53  173.82
   0   2   3 1294.74  129.34
   0  -2   3 1357.34  138.09
   0   2  -3 1445.99  146.09
   0   2   3 1773.20  199.64
   0  -2  -3 1380.39  137.35
   0   2   3 1424.23  145.23
   0  -2   3 1172.08  125.48
   0  -2  -3 1445.96  149.48
   0   2   3 1372.64  140.06
   0   2  -3 1452.56  148.28
   0  -2  -3 1492.17  153.12
   0  -2   3 1348.32  137.79
   0  -2  -3 1602.62  150.59
   0  -2  -3 1362.00  136.09
   0  -2  -3 1450.81  129.07
   0   2  -3 1514.68  140.85
   0   3  -3  615.45   65.93
   0  -3  -3  599.83   51.52
   0  -3   3  534.12   47.37
   0  -3   3  549.05   50.72
   0  -3  -3  641.86   58.11
   0   3   3  543.73   48.66
   0   3   3  551.14   46.89
   0  -3  -3  587.53   43.66
   0   3  -3  648.50   49.20
   0   3   3  582.30   37.54
   0  -3  -3  661.10   60.36
   0   3  -3  579.50   48.10
   0   3  -3  602.73   55.18
   0  -3  -3  603.50   51.14
   0   3   3  610.47   55.04
   0  -3   3  413.80   43.22
   0   3  -3  523.04   44.96
   0  -3  -3  626.97   44.21
   0  -3  -3  608.97   40.67
   0   3   3  668.32   56.04
   0   4  -3   12.85    6.21
   0  -4  -3   15.90    6.21
   0   4  -3    7.47    8.34
   0  -4  -3   12.89    3.24
   0  -4  -3   16.26    2.53
   0  -4  -3   14.27    6.14
   0   4  -3   12.54    4.34
   0   4  -3   11.30    5.50
   0   4   3   13.35    5.13
   0  -4  -3   14.57    1.83
   0   4   3   13.73    1.68
   0  -4  -3   13.00    4.51
   0   4   3   10.77    4.79
   0  -4   3   11.88    4.72
   0   4  -3   13.02    3.16
   0   4  -3   13.23    0.72
   0  -4   3    5.10    5.08
   0  -4   3   11.26    5.34
   0   4   3   12.79    4.03
   0   4  -3   12.67    4.39
   0  -4  -3   11.65    4.87
   0  -5  -3  182.62   18.86
   0  -5  -3  147.74   13.92
   0   5  -3  153.12    7.87
   0  -5  -3  162.45    7.42
   0   5   3  172.16   17.48
   0  -5  -3  152.30    7.70
   0  -5  -3  148.44   14.75
   0   5  -3  153.07   16.63
   0   5  -3  151.09   13.94
   0   5  -3  152.61   12.61
   0  -5   3  140.02   15.90
   0  -5  -3  154.36   16.59
   0  -5  -3  177.56   12.72
   0   5   3  141.43   12.85
   0   5  -3  144.93   14.18
   0   5   3  141.79   14.93
   0   5  -3  147.67   11.73
   0   5   3  135.76   10.51
   0  -5   3  143.13   16.51
   0   5  -3  141.97    6.59
   0  -5   3  137.75   14.21
   0  -6   3  375.74   34.15
   0  -6  -3  419.62   36.75
   0  -6  -3  407.96   33.98
   0   6   3  379.74   32.91
   0  -6   3  401.56   36.71
   0  -6   3  391.04   32.79
   0   6   3  390.28   33.74
   0   6   3  398.97   31.35
   0   6   3  306.64   25.90
   0   6   3  376.40   24.65
   0  -6  -3  415.26   24.23
   0  -6   3  412.45   54.87
   0   6  -3  416.95   35.12
   0   6  -3  382.92   33.37
   0   6  -3  429.74   26.45
   0   6  -3  418.08   33.42
   0   6  -3  413.72   31.82
   0   6  -3  397.08   23.34
   0  -6  -3  522.70   36.17
   0   6  -3  408.68   30.64
   0  -6  -3  512.99   42.75
   0   7   3  122.25   10.47
   0   7  -3  129.32   11.56
   0  -7  -3  132.80   14.71
   0   7   3  123.40   13.25
   0   7  -3  133.66   13.27
   0  -7   3  137.02   15.98
   0  -7   3  146.53   14.23
   0   7  -3  124.37    6.42
   0  -7  -3  134.83   12.97
   0  -7   3  128.37   25.10
   0   7  -3  135.77   12.34
   0  -7   3  126.07   12.44
   0   7  -3  121.20   13.01
   0   7   3   99.59   10.31
   0  -7  -3  172.28   12.34
   0   7  -3  115.75    8.81
   0   7   3  120.00   13.65
   0   7   3  119.57    7.91
   0  -7  -3  134.16   12.04
   0   7  -3  128.30   10.60
   0  -7  -3  134.63   12.13
   0  -7   3  159.15   10.05
   0  -7   3  119.61   13.81
   0  -7  -3  164.61   16.28
   0  -8   3   62.82    7.93
   0  -8  -3   66.69    7.54
   0  -8  -3   67.78    8.37
   0   8  -3   67.31   12.43
   0   8  -3   63.65    7.75
   0   8   3   61.61    8.68
   0   8  -3   60.84    3.43
   0  -8  -3   70.89    7.25
   0  -8  -3   83.87   10.37
   0  -8   3   69.81   10.89
   0  -8  -3   67.23    9.75
   0  -8   3   83.99    9.39
   0  -8   3   63.70   16.60
   0  -8   3   76.77    9.88
   0   8   3   59.92    9.39
   0   8   3   48.75    6.60
   0   8   3   64.56    6.48
   0   8  -3   58.25    4.06
   0   8   3   59.17    4.93
   0   8  -3   61.36    8.72
   0   8  -3   64.55   10.09
   0   8  -3   67.47    8.69
   0  -8   3   62.67   15.76
   0  -8  -3   69.68    7.47
   0   9  -3   67.86    3.95
   0   9   3   71.24   15.30
   0   9  -3   65.02    4.77
   0   9  -3   70.29    8.34
   0  -9  -3   74.75    7.77
   0   9   3   67.39   10.12
   0   9  -3   71.10    9.34
   0  -9   3   83.47   10.44
   0  -9  -3   80.54    7.89
   0  -9   3   72.58    5.21
   0   9  -3   64.03    6.05
   0  -9  -3   95.55   10.79
   0   9   3   65.57    5.41
   0  -9  -3   71.28    8.48
   0   9   3   55.76    7.12
   0  -9   3   75.36   16.18
   0   9  -3   62.73    7.94
   0   9   3   66.81    6.72
   0  -9   3   71.72    8.16
   0   9  -3   73.74    7.81
   0  -9   3   77.33   11.64
   0  -9  -3   75.49   10.44
   0 -10  -3   62.49    6.81
   0  10  -3   54.60    7.38
   0  10  -3   54.43    4.45
   0  10   3   44.12    6.29
   0  10  -3   53.56    5.45
   0 -10   3   63.91    9.43
   0 -10   3   65.01   14.11
   0 -10  -3   79.12    9.52
   0 -10  -3   69.69    7.02
   0 -10   3   63.10   10.37
   0  10   3   55.89    9.44
   0  10  -3   51.33    7.08
   0  10   3   51.05    7.68
   0  10  -3   54.94    3.51
   0  10   3   52.72    4.96
   0  10  -3   58.92    8.27
   0 -10   3   60.30    7.14
   0 -10   3   60.52    4.66
   0  10   3   53.52    5.92
   0 -10  -3   60.25    9.25
   0 -10  -3   58.56    7.58
   0  10  -3   59.21    6.97
   0 -11  -3    0.29    2.13
   0 -11  -3    0.29    2.26
   0  11  -3    0.07    1.22
   0  11  -3    0.30    0.66
   0 -11   3    0.93    2.32
   0 -11   3    2.45    2.59
   0  11   3    0.53    1.16
   0  11  -3    0.26    1.66
   0  11   3   -0.45    2.29
   0  11   3    0.46    1.83
   0 -11   3    1.34    3.41
   0  11  -3    0.49    1.00
   0 -11   3   -0.42    2.08
   0 -11   3    0.41    1.59
   0 -11  -3    0.49    1.49
   0 -11   3    0.18    0.96
   0  11  -3    0.13    1.78
   0  11   3    0.16    1.50
   0 -11  -3    0.39    1.78
   0  11   3    0.30    1.18
   0 -11  -3    0.36    1.54
   0  11  -3   -1.13    3.20
   0  11  -3    0.30    1.45
   0 -12   3    6.00    4.45
   0  12   3    3.63    3.21
   0  12   3    3.18    2.12
   0 -12  -3    4.17    2.49
   0 -12   3    5.70    2.64
   0 -12   3    4.85    4.10
   0 -12   3    8.26    1.76
   0  12  -3    2.41    3.10
   0 -12  -3    7.18    6.18
   0 -12   3    3.64    3.60
   0 -12   3    3.26    5.66
   0  12   3    4.17    1.99
   0  12  -3    3.30    2.45
   0  12  -3    3.97    2.13
   0 -12  -3    4.46    3.09
   0  12  -3    7.30    3.14
   0  12  -3    4.72    1.91
   0  12  -3    3.97    2.92
   0  12   3    3.99    2.54
   0 -12  -3    6.09    2.42
   0 -12  -3    5.06    2.49
   0  12   3    3.55    3.97
   0  12  -3    3.91    1.18
   0 -12  -3    5.37    3.89
   0  13  -3  142.71   12.05
   0  13   3  136.33   11.67
   0 -13  -3  179.24   13.01
   0 -13   3  158.37   15.86
   0  13  -3  146.05    9.27
   0 -13   3  137.59   14.38
   0  13  -3  154.60   12.98
   0  13   3  118.27   12.06
   0  13  -3  156.65   15.50
   0  13  -3  146.88   14.73
   0  13   3  159.39   12.88
   0 -13   3  184.62   11.93
   0  13  -3  148.59   14.65
   0 -13   3  190.80   20.49
   0 -13   3  173.57   13.43
   0 -13  -3  177.17   13.42
   0  13  -3  144.52   11.38
   0 -13  -3  174.26   19.70
   0  13   3  151.82   18.48
   0 -13  -3  164.56   14.76
   0 -13   3  178.92   19.34
   0  13   3  149.23   15.57
   0 -13  -3  174.43   17.63
   0 -13  -3  169.49   13.23
   0  14  -3  633.44   49.06
   0 -14   3  835.59   63.63
   0  14  -3  628.15   53.06
   0  14   3  673.42   67.70
   0 -14   3  676.19   60.38
   0  14  -3  655.14   54.83
   0 -14  -3  829.72   64.59
   0  14  -3  665.37   59.27
   0  14   3  653.04   59.82
   0 -14   3  821.09   74.96
   0  14   3  521.01   47.51
   0 -14  -3  773.58   61.51
   0 -14   3  781.47   63.02
   0  14   3  597.83   51.76
   0  14  -3  631.36   57.19
   0 -14   3  874.88   79.88
   0 -14  -3  762.65   69.06
   0 -14  -3  768.33   61.18
   0 -14   3  723.90   64.36
   0  14  -3  615.37   52.79
   0 -14  -3  729.14   59.63
   0  14   3  682.60   56.46
   0 -14  -3  735.09   62.95
   0  14  -3  653.70   58.43
   0 -15   3  113.90   12.42
   0  15   3  102.25   15.55
   0  15  -3  100.63   12.34
   0 -15   3  127.63    9.13
   0 -15  -3  129.50    9.76
   0 -15   3  136.60   16.50
   0 -15  -3  115.50   13.80
   0 -15  -3  119.08    9.56
   0  15  -3   99.76    9.62
   0  15   3  100.96    8.96
   0  15  -3  103.26   11.64
   0 -15   3  118.04   11.90
   0  15  -3   99.94    7.05
   0 -15  -3  114.23   11.55
   0  15   3   79.57    9.19
   0  15   3   99.27   12.25
   0  15  -3   96.64   11.04
   0 -15  -3  131.09    9.81
   0  15  -3  107.06    9.69
   0  15   3   92.50    9.69
   0 -15   3  125.55   15.56
   0 -15   3  121.19    9.94
   0 -15  -3  114.33    9.73
   0  15  -3   93.84    9.00
   0  16  -3   36.04    4.79
   0  16  -3   34.15    6.95
   0 -16   3   42.80    9.50
   0  16  -3   29.89    5.30
   0  16  -3   33.45    6.35
   0  16  -3   29.37    4.56
   0 -16  -3   36.65    6.04
   0  16   3   34.02    8.93
   0 -16   3   40.33    6.12
   0 -16  -3   33.57    4.46
   0  16  -3   30.81    3.22
   0 -16   3   39.94    4.41
   0  16   3   28.68    5.30
   0 -16  -3   37.87    4.75
   0  16   3   31.07    6.73
   0 -16   3   38.88    8.21
   0  16   3   30.95    4.28
   0 -16  -3   39.46    4.39
   0 -16   3   36.78    6.72
   0 -16   3   39.97    4.88
   0  16   3   25.10    4.91
   0 -16  -3   39.15    7.80
   0 -16  -3   40.96    4.72
   0  17   3    7.88    5.63
   0  17   3    7.50    2.39
   0  17  -3    7.96    1.85
   0 -17  -3   11.36    4.88
   0 -17  -3   10.21    3.66
   0  17  -3    8.77    3.83
   0 -17   3   10.05    5.06
   0  17  -3    8.25    2.79
   0  17   3    7.76    3.45
   0 -17   3   11.93    6.01
   0  17  -3   11.21    3.46
   0 -17  -3   11.84    2.72
   0 -17   3   12.09    3.68
   0 -17  -3   11.80    4.08
   0  17  -3    8.04    2.66
   0  17   3    7.64    5.49
   0 -17   3    9.76    2.70
   0 -17  -3    8.26    2.49
   0 -17  -3   10.38    2.78
   0  17  -3    7.72    4.39
   0 -17   3   11.50    4.06
   0  18  -3  101.71    9.12
   0 -18  -3  121.83   11.97
   0 -18  -3  138.71   10.42
   0 -18  -3  124.63   15.26
   0  18  -3  101.11    9.69
   0  18  -3  104.40   12.97
   0 -18   3  126.69   14.93
   0 -18   3  152.01   18.11
   0  18  -3  109.07   12.38
   0 -18   3  130.62   13.29
   0  18   3  103.18    8.94
   0 -18   3  155.86   13.30
   0 -18  -3  125.57    8.60
   0 -18  -3  111.93    9.35
   0  18   3   -0.18   26.58
   0  18  -3  100.39   11.54
   0 -18   3  120.02    9.88
   0 -18  -3  123.16    9.94
   0  18   3  108.30   17.34
   0  18  -3   97.83    7.52
   0  18   3   89.82    9.54
   0 -19  -3  187.63   17.88
   0  19   3  121.48   11.63
   0 -19  -3  149.34   12.01
   0 -19   3  205.10   22.64
   0 -19   3  166.96   17.07
   0  19  -3  133.22   12.35
   0 -19  -3  153.20   12.04
   0 -19   3  174.47   16.89
   0  19  -3  143.01   15.73
   0  19   3  133.53   34.53
   0  19  -3  153.40   14.13
   0  19  -3  127.24    9.52
   0 -19  -3  164.46   15.14
   0  19  -3  148.84   15.71
   0 -19  -3  168.95   11.08
   0 -19   3  158.25   12.43
   0 -19  -3  168.20   18.53
   0  19   3  140.17   21.09
   0  19   3  128.24   10.55
   0 -19   3  172.75   18.18
   0  19  -3  134.35   11.21
   0 -20  -3    1.51    1.22
   0  20  -3    2.43    1.70
   0  20   3    1.88    8.42
   0 -20   3    1.91    1.71
   0 -20  -3    4.01    3.64
   0 -20   3    0.83    4.47
   0  20   3    2.62    4.30
   0  20  -3    1.92    1.32
   0  20  -3    2.80    2.00
   0  20  -3    2.21    2.79
   0  20  -3    1.43    2.20
   0 -20   3    1.72    3.45
   0 -20   3    1.24    2.96
   0 -20  -3    2.39    1.82
   0  20   3    1.99    1.76
   0  20   3    1.10    1.95
   0 -20   3    2.85    1.68
   0  20  -3    2.18    3.10
   0 -20  -3    3.59    2.50
   0 -20  -3    2.33    3.43
   0 -20  -3    0.74    1.54
   0 -20  -3    1.50    3.06
   0 -21  -3   59.67    8.47
   0  21   3   44.83   24.27
   0  21   3   50.14   12.79
   0 -21   3   59.11    7.81
   0  21  -3   58.15    8.41
   0 -21   3   52.96    6.04
   0  21   3   53.10   10.19
   0 -21   3   65.51    9.59
   0 -21  -3   59.60    4.68
   0  21  -3   51.69    8.71
   0  21  -3   49.34    5.67
   0  21  -3   57.56    9.30
   0 -21  -3   71.03    6.84
   0 -21   3   59.61    6.14
   0 -21  -3   56.51   10.22
   0 -21  -3   78.73   12.43
   0 -21  -3   49.29    5.45
   0  21  -3   56.75    9.01
   0  21  -3   50.08    6.96
   0  21   3   47.29    6.30
   0  21   3   61.52    6.71
   0  21  -3   49.02    4.92
   0 -22   3  106.23   11.90
   0 -22  -3  115.32   13.23
   0 -22   3  121.54   10.17
   0  22  -3  108.57   13.17
   0  22  -3  104.71    9.39
   0  22  -3  110.97   14.13
   0  22  -3   99.34   13.42
   0 -22  -3  113.31   15.40
   0  22  -3  111.07   14.13
   0  22   3   88.08   18.49
   0  22   3   96.18   14.65
   0  22   3  111.06   10.51
   0 -22   3  101.27    9.51
   0 -22  -3  144.36   13.75
   0 -22  -3  135.28   11.34
   0  22   3   82.17   32.48
   0 -23   3    2.04    1.54
   0 -23  -3    1.21    2.54
   0  23   3    1.04    1.67
   0  23   3    1.05    4.37
   0 -23  -3    2.04    3.35
   0  23   3    0.95    3.56
   0 -23   3    2.16    2.30
   0  23   3    2.16    8.50
   0  23  -3    0.97    2.83
   0  23  -3    0.99    3.21
   0  23  -3    1.75    3.00
   0  23  -3    1.74    2.57
   0 -23  -3    1.25    2.26
   0 -24   3    1.47    2.29
   0  24  -3    1.71    2.84
   0  24   3    0.91    3.60
   0  24   3    3.13    8.30
   0  24  -3    0.13    3.20
   0  24  -3    1.72    2.76
   0 -24  -3    2.49    2.55
   0  24   3    1.16    4.37
   0  24  -3    1.28    2.54
   0 -24   3    0.88    1.46
   0 -24  -3    0.74    2.14
   0 -24  -3    1.66    3.34
   0  25  -3   63.45    9.97
   0 -25   3   71.08   10.58
   0  25  -3   67.82   11.79
   0  25  -3   54.87    9.73
   0 -25  -3   68.86   10.01
   0  25   3   48.84   15.15
   0  25   3   46.97   28.64
   0  25   3   55.25   12.31
   0 -25  -3   66.97   11.89
   0  25  -3   56.36   10.37
   0 -26  -3    1.07    3.37
   0  26  -3    0.64    2.45
   0  26   3    2.12    4.47
   0  26  -3    1.62    2.68
   0 -26   3    0.79    2.62
   0  26  -3    1.03    3.51
   0  26   3    1.82    8.94
   0  26   3    0.97    3.70
   0 -26  -3    1.43    2.58
   0  27   3    4.58    5.70
   0  27  -3    5.64    5.33
   0 -27  -3    8.01    4.93
   0  27  -3    6.84    3.87
   0  27   3    5.91    6.88
   0 -27  -3    6.63    3.81
   0  27  -3    5.24    4.13
   0 -27   3    7.23    3.72
   0  27   3    6.85   13.02
   0  28   3   20.44   10.12
   0  28  -3   23.81    5.83
   0  28  -3   23.69    7.80
   0  28  -3   21.82    7.35
   0  28   3   14.56   17.48
   0 -28   3   22.23    5.50
   0 -28  -3   21.41    5.74
   0 -28  -3   24.10    7.42
   0  28   3   21.30    8.41
   0  28  -3   16.52    6.12
   0  29  -3    0.25    1.93
   0  29   3   -0.58    2.74
   0 -29  -3    1.08    2.26
   0  29  -3    0.51    1.70
   0 -29  -3    0.37    1.76
   0  29   3    0.36    5.91
   0 -29   3   -0.25    1.71
   0  29  -3   -0.13    2.45
   0  29  -3   -0.45    2.33
   0  29   3    0.38    3.22
   0 -30  -3    2.76    3.88
   0  30  -3    2.10    2.49
   0  30   3    2.22    4.95
   0 -30  -3    3.70    2.88
   0  30  -3    2.17    3.08
   0  30  -3    2.49    3.64
   0  30   3   -0.74    8.58
   0 -30   3    4.96    4.83
   0  30  -3    2.58    3.84
   0  30   3    1.16    4.08
   0  31   3    1.93    7.89
   0 -31  -3    3.06    3.92
   0  31   3    1.29    3.99
   0  31  -3    1.99    3.85
   0  31   3    0.96    4.96
   0 -31   3    2.60    2.67
   0  31  -3    1.43    3.78
   0  31  -3    2.30    2.25
   0  31  -3    3.38    3.60
   0 -31  -3    2.08    2.95
   0  32  -3    4.74    6.22
   0  32  -3   -0.45    6.41
   0  32  -3   15.98    5.88
   0 -32  -3   14.04    5.05
   0 -32   3   17.74    4.64
   0  32   3   19.39    6.37
   0  32  -3   -0.08    6.35
   0 -32  -3   19.55    6.51
   0  32   3    0.00    7.94
   0  33  -3   -0.28    2.30
   0 -33  -3   -0.12    2.67
   0 -33  -3   -1.39    2.00
   0  33   3   -0.08    3.18
   0  33  -3    0.25    1.51
   0 -33   3   -0.07    1.83
   0  33  -3    0.12    2.64
   0  33  -3    0.91    2.38
   0  33   3    0.00    2.51
   0  34  -3    0.47    3.31
   0 -34  -3    7.01    4.66
   0 -34   3   -0.36    2.51
   0  34   3    0.29    4.03
   0  34  -3    0.24    3.03
   0 -34  -3    0.18    3.39
   0  34  -3   -0.16    2.93
   0  34  -3    0.00    1.83
   0 -35  -3   -0.07    3.50
   0  35  -3   -0.09    2.95
   0  35  -3    0.17    3.45
   0  35   3    0.09    3.09
   0  35  -3   -1.70    3.17
   0 -35  -3   -0.96    2.41
   0 -35   3    0.00    2.37
   0  36  -3   19.60    7.55
   0  36  -3   -0.26    7.21
   0  36  -3   -0.72    8.12
   0  36   3   24.12    7.73
   0 -36  -3   21.94    8.31
   0 -36   3   13.86    5.41
   0 -37   3    6.14    3.01
   0  37  -3    2.89    4.56
   0  37   3    0.21    7.62
   0  37  -3   -1.89    4.51
   0  37  -3    0.30    4.87
   0 -37  -3    0.03    5.09
   0  37   3    0.01    4.74
   0 -38  -3    5.45    7.01
   0 -38   3    3.51    3.75
   0  38   3   -0.25    3.26
   0  38  -3   -1.13    2.83
   0  38  -3   -1.45    3.09
   0  38   3    1.26    5.29
   0  39   3   -0.92    6.29
   0  39  -3    0.63    2.97
   0  39   3   -8.42    3.56
   0  39  -3    4.25    3.37
   0 -39  -3    1.91    4.17
   0  40   3   46.43    8.81
   0 -40   3   -2.97   12.76
   0  40   3   18.84   17.94
   0  40  -3    4.47   13.71
   0 -40  -3   27.54   11.79
   0   0   4   24.65    6.43
   0   0  -4   25.69    5.59
   0   0   4   23.39    6.20
   0   0  -4   25.01    5.67
   0   0  -4   27.37    2.95
   0   0   4   19.49    5.22
   0   0  -4   27.45    9.09
   0   0   4   24.77   10.35
   0   0  -4   28.15   12.40
   0  -1   4   60.74   14.01
   0   1   4   49.52    7.89
   0   1   4   59.75    9.35
   0   1  -4   67.80   13.63
   0   1  -4   61.23    8.55
   0   1   4   60.96   15.73
   0   1   4   59.05    9.69
   0  -1  -4   61.67    4.41
   0  -1  -4   81.86    6.52
   0  -1   4   58.53    9.76
   0   1  -4   63.36    5.25
   0  -1  -4   60.56    8.47
   0   1  -4   65.80   10.27
   0  -1   4   56.96    9.16
   0  -1  -4   60.15    8.54
   0  -1   4   60.77    9.68
   0  -1  -4   64.19   10.63
   0  -1  -4   67.74   13.14
   0   2   4  314.63   28.50
   0  -2  -4  316.39   26.81
   0  -2  -4  383.20   37.46
   0  -2   4  267.30   26.82
   0  -2  -4  314.89   20.82
   0  -2  -4  344.11   31.61
   0   2  -4  331.29   30.33
   0  -2  -4  324.52   27.35
   0  -2   4  314.75   29.28
   0  -2  -4  335.19   20.31
   0   2  -4  306.12   25.66
   0   2  -4  286.53   32.19
   0   2  -4  343.83   23.26
   0  -2   4  343.44   36.44
   0  -2   4  287.47   26.47
   0  -2  -4  344.92   23.05
   0   2   4  311.63   28.91
   0   2  -4  349.72   38.00
   0   2   4  275.48   24.36
   0   2   4  326.18   41.57
   0  -3  -4  129.70    8.33
   0   3  -4  128.53    9.87
   0   3  -4  107.90   11.59
   0   3  -4  121.81   12.42
   0  -3  -4  118.56   12.65
   0   3   4  112.18   13.36
   0   3   4  108.91   11.61
   0  -3   4  107.80   12.79
   0  -3  -4  128.49    7.17
   0   3   4  128.83   24.15
   0  -3   4  115.52   13.75
   0   3  -4  129.37   15.42
   0  -3   4  120.21   14.48
   0   3   4  132.83   11.40
   0  -3  -4  152.02   18.95
   0  -3   4   91.79   13.04
   0   3   4  121.56   22.84
   0  -3  -4  124.24   12.90
   0  -3  -4  127.97   16.00
   0  -3  -4  126.79    8.87
   0   3  -4  132.14   20.38
   0  -4  -4  580.42   40.19
   0   4  -4  530.04   56.26
   0   4   4  455.48   40.13
   0  -4  -4  495.75   41.41
   0   4   4  442.75   37.42
   0   4   4  543.42   43.71
   0   4   4  514.87   62.31
   0  -4  -4  530.12   47.68
   0  -4   4  321.73   33.53
   0   4  -4  459.18   39.15
   0  -4  -4  523.57   47.34
   0  -4  -4  506.82   42.18
   0   4  -4  527.70   39.13
   0  -4   4  458.99   41.21
   0   4  -4  538.44   40.44
   0   4  -4  499.98   41.07
   0  -4  -4  524.11   33.06
   0  -4   4  491.50   43.97
   0  -4  -4  519.62   34.69
   0   4  -4  520.79   46.18
   0  -5  -4  190.35    9.46
   0   5  -4  184.22   18.94
   0  -5  -4  184.44   16.73
   0  -5  -4  195.36   20.72
   0   5   4  167.66   17.02
   0   5   4  189.01   31.27
   0  -5  -4  185.97   20.38
   0   5   4  162.52   14.81
   0   5   4  188.69    9.06
   0   5   4  189.85   17.05
   0   5  -4  181.09   14.09
   0  -5   4  162.36   17.28
   0   5  -4  190.19   14.19
   0   5  -4  172.63   16.46
   0  -5  -4  178.30   11.31
   0   5  -4  188.21   16.94
   0  -5   4  178.75   18.14
   0  -5  -4  220.17   14.29
   0  -5  -4  191.38   17.61
   0  -6   4  385.59   54.85
   0  -6  -4  403.54   38.26
   0   6   4  346.79   32.20
   0  -6   4  359.27   43.22
   0  -6  -4  487.47   33.38
   0   6  -4  379.33   33.33
   0   6   4  398.33   34.69
   0   6  -4  390.54   29.46
   0   6   4  349.75   29.37
   0   6   4  403.29   54.06
   0   6  -4  372.66   29.44
   0  -6  -4  425.88   39.11
   0  -6  -4  435.04   25.44
   0   6   4  386.33   23.83
   0  -6  -4  425.60   23.94
   0  -6  -4  386.87   32.50
   0   6  -4  402.02   33.88
   0   6  -4  401.14   48.12
   0  -6  -4  392.32   33.92
   0  -6   4  335.61   31.70
   0  -7  -4  709.59   60.28
   0  -7  -4  824.61   74.56
   0   7  -4  685.10   62.84
   0  -7   4  631.30   59.13
   0  -7  -4  742.09   65.02
   0   7  -4  746.54   66.70
   0   7  -4  733.23   49.83
   0   7  -4  671.46   54.17
   0  -7  -4  768.76   71.86
   0  -7  -4  955.92   72.71
   0   7  -4  761.88   66.23
   0  -7   4  681.26   61.21
   0   7  -4  703.41   48.41
   0   7   4  644.32   64.55
   0  -7  -4  725.99   62.26
   0  -7   4  711.43   88.16
   0   7  -4  706.38   59.23
   0   7   4  668.88   61.76
   0   7   4  749.10   67.72
   0  -7  -4  681.37   44.28
   0   7   4  720.64   53.12
   0  -8  -4   65.65    7.98
   0   8   4   67.98    9.67
   0   8   4   62.74    4.43
   0   8  -4   59.07    4.22
   0   8  -4   65.41    9.01
   0  -8  -4   62.86    8.39
   0   8  -4   64.90    8.59
   0   8   4   58.61    8.96
   0  -8  -4   74.98   10.89
   0  -8   4   83.07    5.55
   0   8   4   57.42    6.71
   0  -8  -4   67.24    7.75
   0   8  -4   62.99    2.99
   0  -8  -4   55.30    6.17
   0  -8   4   58.11   18.24
   0  -8   4   55.60    8.87
   0  -8   4   63.95    8.67
   0  -8  -4   66.40   10.27
   0   8  -4   58.98    5.49
   0   8  -4   63.05    7.75
   0   8  -4   61.61    9.05
   0  -9   4    4.39    1.22
   0  -9  -4    3.55    2.84
   0   9   4    3.83    3.14
   0  -9   4    4.04    3.01
   0  -9  -4    3.53    2.68
   0   9   4    3.96    1.43
   0   9   4    3.49    3.39
   0   9  -4    5.45    5.52
   0   9  -4    3.51    2.79
   0  -9  -4    4.30    3.79
   0   9  -4    3.30    0.64
   0   9   4    3.41    2.12
   0  -9   4    3.99    6.58
   0   9  -4    3.22    0.87
   0   9   4    1.95    2.18
   0  -9   4    3.06    3.18
   0   9  -4    2.72    3.14
   0  -9  -4    4.62    3.79
   0   9  -4    3.56    1.70
   0   9  -4   -0.41    2.71
   0  -9  -4    3.04    2.43
   0  10  -4    1.60    0.53
   0 -10   4    1.89    5.43
   0  10  -4    1.17    0.84
   0  10   4    2.51    4.80
   0  10   4    1.24    1.71
   0  10  -4    1.51    2.24
   0  10  -4    1.59    1.45
   0 -10  -4    2.50    2.18
   0 -10   4    1.99    3.51
   0  10   4    1.47    5.46
   0 -10   4    2.13    1.05
   0  10   4    0.92    1.91
   0  10  -4    8.87    2.50
   0 -10  -4    1.66    3.18
   0  10  -4    1.08    2.28
   0 -10   4    1.17    2.67
   0 -10  -4    1.59    2.38
   0  10   4    1.38    1.29
   0  10  -4    1.29    2.64
   0 -10   4    1.46    2.46
   0 -10  -4    2.17    2.01
   0 -10  -4    0.89    3.20
   0 -11   4   87.09   11.81
   0 -11  -4   78.57    8.10
   0 -11  -4   77.99   11.43
   0 -11   4   84.63   17.28
   0  11  -4   71.68    9.19
   0 -11  -4   98.93   11.79
   0  11   4  170.96   28.27
   0  11   4   68.30    6.95
   0  11   4   67.68    9.33
   0 -11  -4   81.53    9.00
   0 -11   4   86.22    5.51
   0  11  -4   82.53    8.97
   0  11  -4   63.82    3.59
   0  11  -4   71.45    6.38
   0 -11   4   80.16   12.46
   0  11   4   66.85    9.80
   0 -11  -4   88.53    8.08
   0 -11   4   73.00    9.48
   0  11  -4   71.54    4.88
   0  11  -4   69.93    8.88
   0 -11   4   79.78    8.80
   0  11   4   73.33    6.34
   0  11   4   50.70    7.10
   0  11  -4   80.83   10.50
   0 -12   4  217.46   17.86
   0 -12  -4  211.32   16.48
   0  12   4  138.30   13.85
   0  12  -4  216.51   18.09
   0 -12   4  234.00   23.26
   0 -12  -4  255.11   18.06
   0 -12   4  223.47   23.86
   0 -12   4  244.91   30.46
   0  12   4  183.04   14.79
   0 -12   4  240.01   14.61
   0  12  -4  186.71   14.18
   0 -12  -4  215.50   18.35
   0 -12   4  198.82   18.56
   0 -12  -4  209.24   21.44
   0  12  -4  173.71   10.09
   0  12   4  183.42   18.32
   0  12  -4  219.21   20.59
   0 -12  -4  267.24   23.22
   0  12   4  171.25   18.80
   0  12  -4  190.63   17.92
   0  12  -4  193.95   12.79
   0  12   4  205.33   15.10
   0  12  -4  190.21   18.11
   0  12   4  213.97   41.36
   0  13  -4  234.53   16.28
   0 -13  -4  265.31   20.49
   0 -13   4  256.36   22.72
   0 -13  -4  348.34   28.37
   0 -13   4  281.03   21.97
   0  13  -4  241.82   22.49
   0 -13   4  303.99   18.78
   0 -13   4  294.03   29.40
   0  13  -4  263.26   21.31
   0  13  -4  249.36   22.23
   0 -13   4  306.63   28.98
   0 -13   4  339.46   36.67
   0  13   4  260.47   19.23
   0  13  -4  247.07   18.88
   0  13   4  177.96   16.88
   0  13   4  234.65   22.78
   0  13   4  225.14   17.68
   0 -13  -4  274.54   26.28
   0 -13  -4  278.36   22.85
   0  13   4  221.33   23.60
   0  13  -4  218.49   13.30
   0 -13  -4  280.42   19.76
   0  13   4  263.96   46.46
   0 -13  -4  272.73   20.90
   0 -14   4    2.47    1.16
   0 -14  -4    1.09    1.78
   0  14   4    0.58    1.64
   0 -14  -4    1.64    1.60
   0 -14   4    2.60    3.62
   0 -14   4    1.07    3.53
   0 -14   4    1.76    2.49
   0 -14   4    1.10    2.43
   0  14  -4    0.95    0.67
   0 -14   4    1.63    1.99
   0  14   4    1.28    2.38
   0  14   4    1.85    7.81
   0  14  -4    2.08    2.70
   0 -14  -4    1.99    1.83
   0 -14  -4    2.34    2.88
   0  14  -4    1.45    1.58
   0  14   4    1.67    2.59
   0  14  -4    1.53    1.91
   0  14  -4    1.22    2.34
   0  14   4    1.28    2.87
   0  14  -4    1.46    1.25
   0  14   4    0.96    1.97
   0 -14  -4    2.20    3.13
   0 -15   4    0.22    3.22
   0 -15  -4    1.18    2.49
   0 -15  -4    1.20    1.54
   0 -15  -4    1.71    1.42
   0 -15   4    1.04    1.07
   0  15  -4    0.79    1.22
   0 -15   4    1.12    1.75
   0 -15   4    1.60    3.29
   0 -15  -4    0.86    2.83
   0  15  -4    0.34    0.64
   0  15  -4    0.75    1.42
   0  15  -4    1.17    2.50
   0  15   4    0.53    1.37
   0  15  -4    0.74    2.12
   0  15   4    0.66    2.32
   0  15  -4    1.41    1.63
   0 -15  -4    1.07    1.62
   0 -15   4    1.08    2.24
   0  15   4    0.79    1.54
   0 -15  -4   -0.28    2.21
   0  15   4    0.51    2.62
   0  15   4   -0.21    1.79
   0 -15   4    0.54    2.12
   0  15   4   -0.78    7.02
   0  16   4  146.89   16.23
   0  16  -4  149.02   15.52
   0 -16  -4  214.88   18.38
   0  16  -4  143.68   14.27
   0 -16   4  175.57   11.40
   0  16  -4  139.39   16.85
   0  16  -4  142.18   16.15
   0  16  -4  129.22    8.19
   0  16   4  140.96   37.03
   0 -16   4  179.38   20.85
   0  16  -4  144.64   11.46
   0 -16   4  155.57   15.30
   0 -16   4  165.77   23.45
   0  16  -4  145.17   16.07
   0 -16  -4  166.20   21.95
   0 -16  -4  154.31   12.51
   0 -16   4  186.72   21.51
   0 -16  -4  171.87   13.00
   0 -16   4  164.61   13.76
   0 -16  -4  181.98   12.90
   0  16   4  129.41   17.82
   0 -16  -4  162.83   18.09
   0  16   4  145.36   12.93
   0  16   4  142.43   11.98
   0  16   4  103.35   11.79
   0  17   4    6.38    2.25
   0 -17  -4    7.84    4.70
   0  17   4    6.50   12.33
   0  17  -4    4.99    2.38
   0  17  -4    5.14    3.74
   0 -17   4    7.18    5.54
   0 -17   4    6.81    2.78
   0 -17   4    8.00    5.72
   0  17  -4    5.24    3.55
   0 -17   4    7.92    3.58
   0  17  -4    6.29    2.74
   0  17  -4    5.84    1.25
   0 -17  -4    8.47    2.39
   0  17  -4    6.89    4.35
   0  17   4    6.97    2.93
   0 -17  -4    5.71    2.32
   0  17   4    4.29    5.66
   0  17  -4    5.20    3.28
   0 -17  -4    6.33    5.33
   0 -17   4    6.01    6.25
   0 -17  -4    7.70    2.32
   0  17   4    5.35    4.64
   0 -17  -4   10.54    3.97
   0  17   4    5.55    4.14
   0  18   4   78.77    7.70
   0 -18  -4  125.05   12.59
   0 -18   4  109.70   11.48
   0  18  -4   86.53    8.79
   0 -18   4  109.85   15.98
   0 -18   4  113.68   16.67
   0 -18  -4   89.43   10.08
   0  18   4   82.78   12.04
   0 -18   4   89.20    8.96
   0  18  -4   82.09   10.15
   0  18  -4   84.92    8.59
   0  18  -4   84.41   17.06
   0  18   4   79.98   14.25
   0 -18  -4  102.23    8.14
   0  18  -4   69.49    5.16
   0  18  -4   68.55    6.79
   0  18  -4   79.15   11.63
   0 -18  -4   82.23    7.75
   0 -18  -4   94.31   13.64
   0  18   4   71.16    9.37
   0 -18  -4  109.57    8.66
   0  18   4   82.23   31.31
   0  18   4   80.83    9.65
   0 -18   4   95.72   11.38
   0  19   4    8.05    5.92
   0 -19  -4   10.25    3.93
   0  19  -4    9.51    1.66
   0 -19  -4   15.55    4.50
   0 -19   4   13.88    4.06
   0 -19  -4   10.30    3.74
   0  19  -4   10.93    3.30
   0  19  -4    9.59    5.12
   0  19  -4    5.83    3.92
   0  19  -4    8.64    4.47
   0 -19   4   10.22    3.04
   0 -19   4   16.71    4.74
   0  19  -4    7.81    2.51
   0  19   4    8.80    3.89
   0 -19  -4   10.75    5.35
   0  19   4    6.85    2.41
   0 -19  -4   10.00    2.71
   0  19   4    5.22   14.47
   0  19  -4    8.23    2.84
   0 -19  -4   12.69    2.80
   0  19  -4    8.09    2.99
   0 -20   4    6.88    2.99
   0 -20  -4    5.02    2.13
   0  20  -4    1.99    1.30
   0  20  -4    2.18    2.25
   0  20  -4    4.83    2.22
   0  20   4    4.49    4.56
   0  20   4    1.71   11.94
   0 -20  -4    3.53    1.96
   0  20  -4    3.75    2.63
   0  20  -4    4.05    4.04
   0  20  -4    4.01    3.53
   0 -20  -4    6.34    3.35
   0  20  -4    3.89    2.01
   0 -20  -4    5.06    4.33
   0 -20   4    3.99    2.28
   0  20   4    3.74    3.12
   0 -20  -4    3.54    2.89
   0 -20  -4    4.46    1.72
   0  20   4    4.43    1.79
   0 -21  -4    6.58    3.62
   0  21  -4    7.30    4.50
   0  21  -4    6.75    3.46
   0 -21   4    7.50    2.70
   0  21  -4    5.92    3.30
   0  21  -4   11.26    1.88
   0  21  -4    8.60    5.27
   0 -21   4    5.87    2.89
   0 -21  -4   10.60    4.20
   0  21   4    5.64    5.92
   0  21  -4    7.10    2.78
   0  21   4    3.00   14.59
   0  21   4    6.83    4.05
   0 -21  -4    6.91    5.33
   0  22   4    1.10    4.85
   0  22  -4    3.63    3.54
   0  22  -4    2.10    2.60
   0 -22  -4    4.05    4.25
   0 -22   4    2.79    2.70
   0  22  -4    3.84    2.88
   0 -22   4    4.03    2.18
   0  22  -4    2.68    2.09
   0  22  -4    4.56    4.18
   0  22   4    0.50   11.55
   0 -22  -4    2.70    3.10
   0 -22  -4    2.85    2.81
   0  22   4    2.37    3.26
   0  23   4  198.02   30.79
   0 -23  -4  270.50   30.10
   0 -23   4  248.70   24.26
   0 -23   4  221.37   20.82
   0  23  -4  241.87   23.91
   0  23  -4  224.88   22.06
   0  23  -4  232.00   25.51
   0 -23  -4  253.00   24.47
   0  23  -4  254.75   27.15
   0 -23  -4  299.75   26.76
   0  23   4  228.94   23.87
   0  23   4  184.30   58.38
   0  24   4  103.15   20.56
   0 -24  -4  128.33   14.34
   0  24  -4  117.45   16.09
   0 -24  -4  138.93   18.57
   0  24  -4  132.29   17.03
   0  24  -4  119.54   13.88
   0 -24   4  113.93   11.51
   0  24  -4  124.84   15.10
   0 -24   4  144.72   15.32
   0  24   4  119.91   15.46
   0  24   4   93.55   42.88
   0 -25  -4   70.77   12.76
   0  25  -4   66.10   11.14
   0 -25   4   65.22    9.44
   0  25  -4   60.69    9.75
   0  25   4   50.80   14.56
   0  25  -4   48.55    8.21
   0 -25  -4   66.09   14.61
   0  25  -4   56.94   10.85
   0  25   4   58.01   10.27
   0  25   4   53.71   32.17
   0  26   4   -0.28    3.74
   0  26   4    1.66   12.33
   0  26  -4    2.96    3.76
   0 -26   4    5.10    3.01
   0 -26  -4    4.91    5.60
   0 -26  -4    5.43    4.39
   0  26  -4    4.91    4.05
   0  26  -4    2.43    3.26
   0  26  -4    2.62    2.79
   0  27  -4   49.25    8.72
   0 -27  -4   75.95   12.94
   0 -27   4   77.33    9.64
   0 -27  -4   71.25   10.55
   0  27  -4   66.24   11.58
   0  27  -4   75.53   11.48
   0  27   4   63.38   10.79
   0  27   4   49.67   30.29
   0  27  -4   65.59   10.30
   0 -28  -4   61.86    9.88
   0  28   4   63.06   10.13
   0  28  -4   66.47   10.34
   0  28  -4   48.06    8.48
   0  28  -4   57.42    9.54
   0 -28   4   68.22    9.00
   0 -28  -4   68.94   11.96
   0  28  -4   56.01   10.59
   0  28   4   49.49   26.98
   0 -29  -4   65.74    9.68
   0  29  -4   63.56   19.73
   0  29  -4   68.36    9.83
   0  29  -4   60.10   13.92
   0 -29   4   49.08    8.77
   0  29  -4   44.03    8.12
   0  29   4   57.63    9.71
   0 -29  -4   71.66   12.01
   0  29   4   49.41   27.37
   0 -30  -4   14.93    6.58
   0  30  -4   10.96    4.64
   0  30  -4   16.89    4.84
   0  30   4   17.35    5.38
   0  30  -4    0.14    9.68
   0 -30  -4   12.19    4.89
   0 -30   4   16.22    4.30
   0  30  -4   15.89    6.68
   0  30   4    3.14   16.13
   0  31  -4   -0.05    2.50
   0  31   4    0.47    4.09
   0  31  -4   -0.04    2.10
   0  31   4    1.54    6.98
   0  31   4    1.18    4.10
   0  31  -4    0.00    2.85
   0  31  -4    1.46    2.07
   0 -31   4   -0.22    3.81
   0 -31  -4   -0.04    3.05
   0  32   4   -0.17    2.12
   0 -32  -4    0.16    2.99
   0  32  -4   -0.05    1.97
   0 -32   4   -0.47    2.03
   0  32  -4   -0.21    1.93
   0  32  -4   -0.14    2.34
   0  32  -4   -0.33    2.76
   0  32   4   -1.30    5.02
   0  32   4    0.47    3.95
   0  33  -4   -0.63    1.57
   0  33  -4   -0.14    1.89
   0  33  -4    0.18    1.74
   0 -33   4    0.24    1.78
   0  33   4   -0.22    4.10
   0  33  -4   -0.04    2.38
   0 -33  -4   -0.16    2.74
   0  33   4   -0.18    3.45
   0  33   4    0.86    1.82
   0 -34   4   -0.30    1.92
   0  34  -4    0.21    2.22
   0 -34  -4    0.05    5.85
   0  34  -4   -0.20    2.85
   0  34  -4    0.08    1.88
   0  34  -4   -0.17    1.88
   0  34   4   -0.45    4.38
   0  34   4   -0.16    4.14
   0  34   4   -0.34    2.08
   0  35  -4    0.00    2.24
   0  35  -4   -0.84    2.24
   0  35  -4   -4.47    2.63
   0  35  -4   -0.64    3.75
   0  35   4    3.39    2.68
   0  36   4    2.24    4.05
   0  36  -4   -1.42    3.74
   0  36  -4    1.66    3.21
   0  36  -4   -0.12    5.59
   0 -36   4   12.21    3.31
   0  37  -4   -3.39    2.89
   0  37  -4    0.79    1.49
   0  37   4   -0.93    1.96
   0 -37  -4    3.31    3.46
   0 -38  -4    1.26    5.51
   0  38  -4    1.09    4.99
   0  39   4    1.91    6.92
   0 -39  -4    0.63    5.75
   0   0   5    1.41    6.97
   0   0  -5    3.91    7.56
   0   0  -5    2.51    3.87
   0   0   5    3.81    3.67
   0   0   5    5.20    4.75
   0   0  -5    4.46    4.21
   0   0  -5    2.39    2.00
   0   0   5    2.50    4.80
   0   0  -5   27.93    5.79
   0   1   5  464.65   44.70
   0  -1  -5  732.06   77.56
   0  -1  -5  626.84   56.33
   0   1   5  568.04   55.85
   0   1  -5  638.18   62.17
   0  -1  -5  603.70   44.22
   0   1  -5  719.59   77.79
   0  -1   5  573.21   56.50
   0  -1   5  576.52   55.79
   0   1   5  601.98   72.08
   0  -1   5  419.49   42.41
   0  -1  -5  614.72   47.55
   0  -1  -5  612.47   45.17
   0   1   5  593.07   56.43
   0   1  -5  602.06   53.63
   0   1  -5  608.71   46.24
   0  -1  -5  633.11   61.59
   0   1  -5  537.94   47.96
   0  -1   5  676.55   73.79
   0   2  -5  303.05   28.32
   0   2  -5  327.60   35.06
   0  -2  -5  362.81   42.71
   0  -2   5  286.95   30.56
   0  -2  -5  315.75   33.20
   0   2  -5  263.79   25.03
   0  -2  -5  321.19   22.41
   0   2  -5  298.40   21.59
   0  -2  -5  315.25   28.64
   0  -2   5  290.89   29.99
   0  -2  -5  316.72   29.87
   0  -2  -5  294.24   20.16
   0   2   5  279.93   29.04
   0   2   5  286.39   41.80
   0  -2  -5  293.61   18.59
   0  -2   5  188.79   21.22
   0   2   5  293.17   29.62
   0  -2   5  283.39   29.89
   0   2   5  237.78   24.20
   0   2  -5  346.32   43.59
   0   3  -5 1808.94  197.35
   0  -3   5 1696.29  191.15
   0  -3   5 1355.66  179.21
   0  -3  -5 1852.56  201.40
   0   3   5 1631.94  180.93
   0   3   5 1505.82  167.73
   0  -3  -5 1987.69  199.14
   0  -3   5 1742.09  197.52
   0  -3  -5 1875.04  188.79
   0   3   5 1995.15  207.42
   0   3  -5 1753.37  181.51
   0  -3  -5 2242.18  259.19
   0  -3  -5 1773.12  174.88
   0  -3  -5 1884.63  205.33
   0  -3  -5 1967.39  220.91
   0   3   5 1737.52  228.08
   0   3  -5 1682.80  184.59
   0   3  -5 2115.42  253.78
   0  -3   5 1906.73  212.49
   0   3  -5 1925.17  217.82
   0  -4   5  102.53   14.94
   0   4   5  129.32   14.82
   0   4   5  152.86   13.75
   0  -4  -5  196.62   27.95
   0  -4  -5  153.27    9.58
   0  -4  -5  168.55   11.92
   0  -4  -5  149.49   17.13
   0  -4   5  138.38   17.84
   0   4  -5  141.56   16.26
   0   4   5  145.14   30.95
   0   4   5  130.30   16.77
   0  -4  -5  153.23    8.75
   0  -4   5  144.98   18.56
   0  -4  -5  161.69   17.01
   0   4  -5  155.23   16.89
   0   4  -5  151.26   12.98
   0  -4  -5  157.33   21.35
   0   4  -5  167.74   21.45
   0   5   5  471.42   44.59
   0  -5   5  509.20   49.04
   0  -5  -5  526.14   46.28
   0  -5  -5  562.17   48.25
   0  -5  -5  543.27   34.99
   0   5   5  495.04   69.47
   0   5   5  552.74   45.05
   0  -5  -5  657.59   46.39
   0  -5  -5  570.68   55.29
   0  -5   5  464.52   44.22
   0   5  -5  527.46   47.38
   0   5   5  462.40   41.97
   0  -5  -5  522.30   34.99
   0  -5  -5  694.65   69.66
   0   5  -5  422.04   36.45
   0   5  -5  536.92   42.33
   0   5  -5  566.11   50.08
   0   5  -5  553.99   53.67
   0   6  -5    0.36    1.42
   0   6  -5   -0.66    1.87
   0   6  -5   -0.03    0.84
   0  -6  -5   -0.04    1.78
   0  -6  -5    1.22    3.47
   0   6   5    0.26    1.59
   0   6   5   -2.62    4.81
   0  -6  -5   -1.32    2.58
   0  -6  -5    0.84    1.87
   0   6   5   -1.53    2.01
   0   6   5    0.17    1.39
   0  -6  -5   -0.82    0.92
   0   6  -5    0.47    1.99
   0   6  -5   -1.79    3.64
   0  -6   5   -0.62    2.24
   0  -6   5    0.13    1.96
   0  -6   5    1.53    5.26
   0  -7   5   30.35   15.38
   0   7   5   26.15    8.02
   0  -7  -5   29.39    5.09
   0   7   5   28.94   15.30
   0  -7  -5   32.12    5.41
   0  -7  -5   42.07   10.40
   0   7   5   30.15    5.13
   0  -7  -5   31.65    7.88
   0  -7  -5   32.29    5.80
   0   7   5   27.73    6.35
   0   7  -5   32.24    6.21
   0  -7  -5   19.32    3.06
   0   7  -5   33.33    6.25
   0   7  -5   27.95    3.16
   0  -7   5   26.69   10.58
   0   7  -5   29.89    6.37
   0   7  -5   29.20    4.96
   0  -7   5   29.85    6.81
   0   8  -5   15.27    4.52
   0   8  -5   14.07    3.83
   0  -8   5   12.79    4.80
   0  -8  -5   20.06   11.14
   0  -8  -5   36.44    7.55
   0   8   5   13.08   12.71
   0  -8  -5   14.97    3.74
   0   8   5   14.00    4.74
   0   8   5   12.40    4.01
   0   8   5   13.00    3.41
   0   8  -5   14.55    5.09
   0  -8  -5   17.93    6.21
   0  -8  -5   12.84    4.31
   0   8  -5   13.57    4.64
   0  -8   5   17.21   11.72
   0  -8   5   13.15    4.79
   0   8  -5   13.17    2.37
   0   9  -5   10.12    3.71
   0  -9   5   11.21    4.30
   0   9  -5   11.26    7.33
   0  -9  -5   11.64    3.33
   0   9   5   10.73    3.89
   0   9   5   11.47    4.26
   0  -9   5   13.90    9.94
   0  -9  -5   13.18    3.76
   0   9  -5   10.25    4.62
   0  -9  -5   14.68    5.59
   0  -9   5    9.48    4.10
   0   9  -5   -0.62    3.88
   0   9   5   10.44    2.91
   0  -9  -5   15.61    5.72
   0   9  -5    9.76    2.14
   0  10   5    3.95    2.95
   0 -10   5    2.81    3.06
   0 -10  -5    3.72    2.37
   0 -10   5    2.29    2.97
   0  10  -5    2.47    3.31
   0  10  -5    2.74    1.59
   0 -10   5    2.72    1.03
   0 -10   5    4.13    7.02
   0 -10  -5    4.05    2.70
   0 -10  -5    3.47    2.80
   0 -10  -5    5.12    4.24
   0  10   5    3.20    3.13
   0  10  -5    4.31    2.91
   0  10   5    2.80    2.08
   0 -10  -5    3.74    4.00
   0  10  -5    3.45    2.89
   0  10  -5    3.51    2.75
   0  11  -5  387.91   30.50
   0  11  -5  452.69   38.50
   0 -11   5  376.94   34.33
   0 -11  -5  444.18   37.44
   0 -11   5  451.26   55.33
   0  11   5  366.51   34.45
   0 -11  -5  500.30   45.00
   0  11   5  412.69   38.54
   0 -11  -5  508.79   38.88
   0 -11  -5  432.04   35.38
   0  11  -5  397.30   35.45
   0  11   5  362.50   30.20
   0 -11  -5  472.95   45.82
   0  11  -5  404.18   35.83
   0 -11   5  436.71   37.83
   0  11  -5  450.64   40.62
   0 -11   5  444.87   28.95
   0 -12   5    0.80    1.89
   0 -12   5    0.38    1.87
   0  12  -5    0.25    1.87
   0 -12   5    0.18    0.66
   0  12   5   -0.25    6.70
   0  12   5   -0.38    2.08
   0 -12  -5    1.05    1.46
   0 -12  -5    0.53    1.88
   0  12   5    0.08    1.26
   0  12  -5   -0.37    1.82
   0 -12  -5    0.34    2.88
   0 -12  -5    1.38    2.49
   0  12  -5    1.09    2.13
   0  12  -5    0.33    0.95
   0  12   5    0.32    2.03
   0  12   5   -0.04    1.53
   0 -12  -5    0.42    1.63
   0  12  -5   -0.16    2.16
   0 -12   5   -1.30    4.20
   0 -13  -5    5.80    4.04
   0 -13  -5    5.43    4.67
   0  13   5    4.51    3.58
   0  13   5    1.92    2.42
   0  13   5    2.87    3.37
   0  13  -5    3.17    2.84
   0  13   5    2.75    1.97
   0 -13  -5    4.60    2.81
   0  13  -5    3.84    3.09
   0 -13  -5    4.92    2.54
   0 -13  -5    5.87    2.43
   0 -13   5    6.17    6.70
   0  13   5    7.76   10.59
   0  13  -5    3.14    1.59
   0 -13   5    3.85    1.09
   0  13  -5    5.13    3.59
   0  13  -5    4.68    6.01
   0 -13   5    4.04    3.01
   0 -13   5    3.56    3.09
   0  14   5    0.63    1.78
   0 -14   5    0.16    3.47
   0 -14   5    0.66    2.17
   0  14  -5    1.28    2.16
   0 -14   5    0.03    4.41
   0  14   5   -0.95    7.77
   0 -14  -5    1.80    2.76
   0 -14  -5    1.49    5.42
   0 -14  -5    0.76    1.42
   0  14   5    0.49    1.34
   0  14   5    0.43    2.66
   0 -14  -5    1.46    1.85
   0 -14  -5    0.08    1.92
   0 -14  -5    0.80    1.66
   0  14   5    0.39    2.46
   0  14  -5    0.50    2.64
   0 -14   5    1.71    3.56
   0  14  -5    0.46    1.92
   0  14  -5    0.18    2.10
   0  15   5    3.13   10.59
   0  15  -5    2.18    2.54
   0 -15  -5    3.34    4.05
   0 -15  -5    3.75    2.32
   0 -15  -5    4.14    1.93
   0  15  -5    2.00    2.89
   0 -15  -5    4.18    2.41
   0 -15  -5    2.87    3.68
   0 -15   5    2.54    3.24
   0  15   5    4.31    3.81
   0 -15   5    2.14    3.05
   0 -15  -5    2.75    2.74
   0  15   5    1.91    3.62
   0  15  -5    3.10    3.59
   0 -15   5    2.60    4.80
   0  15  -5    3.08    2.99
   0  16  -5    7.12    4.89
   0  16  -5    4.43    3.84
   0  16   5    7.59    2.60
   0 -16  -5   10.02    3.05
   0 -16  -5    8.48    2.93
   0 -16  -5    8.25    5.30
   0  16   5    7.31    5.21
   0 -16  -5    9.25    2.51
   0 -16   5    9.84    4.14
   0 -16  -5   11.31    4.71
   0 -16  -5    7.93    3.50
   0  16  -5    8.16    3.28
   0  16   5    4.10   14.64
   0  16  -5    5.29    4.01
   0 -16   5    5.42    4.04
   0 -16   5    8.37    6.18
   0 -17   5   42.68    8.34
   0  17  -5   40.04   10.18
   0 -17  -5   51.04    5.54
   0 -17  -5   43.62   10.13
   0 -17  -5   41.13    5.87
   0  17   5   24.43   26.76
   0 -17  -5   44.55    7.01
   0 -17  -5   58.07    9.33
   0  17   5   39.83   10.56
   0 -17  -5   50.50    6.02
   0  17  -5   42.18    9.44
   0  17  -5   42.96    8.29
   0  18   5    4.43   16.19
   0 -18  -5    8.73    5.72
   0 -18  -5    7.75    3.60
   0  18  -5    7.01    4.37
   0  18  -5    6.72    3.67
   0  18  -5    8.22    3.37
   0 -18  -5   10.67    4.64
   0 -18  -5    8.71    3.10
   0  18  -5    7.71    5.33
   0  18   5   10.21    5.72
   0 -18   5   10.75    4.29
   0  19  -5   34.41    5.67
   0  19  -5   33.35   14.81
   0  19   5   30.91   10.14
   0 -19  -5   37.34    9.51
   0 -19   5   40.65    7.18
   0  19   5   20.22   25.87
   0  19  -5   54.22   14.00
   0 -19  -5   33.21    6.29
   0 -19  -5   43.67    7.94
   0 -19  -5   35.36    5.38
   0  19  -5   30.64    6.47
   0  20  -5    0.86    1.46
   0 -20  -5    0.71    2.05
   0  20   5   -1.12    8.13
   0 -20  -5    0.25    1.32
   0 -20  -5   -0.03    1.84
   0 -20  -5    1.05    2.81
   0  20   5   -1.89    3.03
   0 -20   5   -0.28    1.91
   0  20  -5    0.45    1.87
   0  20  -5    0.70    2.74
   0  20  -5   -1.01    2.29
   0  21  -5  101.90   15.25
   0 -21  -5  109.62   17.22
   0 -21  -5  130.71   15.38
   0  21   5   95.89   19.13
   0 -21   5  137.79   14.48
   0  21   5   68.65   41.79
   0  21  -5  103.39   11.30
   0 -21  -5  104.76   13.11
   0  21  -5  110.30   16.61
   0 -22  -5   39.58    7.55
   0  22   5   32.73   11.76
   0  22  -5   35.61    9.06
   0 -22  -5   44.01    8.27
   0 -22  -5   39.91   10.43
   0  22   5   17.77   28.66
   0  22  -5   45.20   10.56
   0 -22   5   40.33    9.34
   0  22  -5   36.79    5.97
   0 -23  -5   51.12    9.06
   0 -23  -5   57.39   12.23
   0  23  -5   51.75    6.80
   0 -23   5   54.90    8.55
   0  23   5   29.29   32.90
   0  23  -5   61.19   12.39
   0  23  -5   51.18   10.93
   0 -23  -5   57.88    9.13
   0 -23   5   50.00    6.79
   0 -24   5    4.46    2.38
   0 -24  -5    5.16    3.45
   0  24   5   -0.53   14.50
   0  24  -5    7.48    4.97
   0 -24  -5    5.68    4.96
   0  24   5   -9.27    6.29
   0  24  -5    5.08    4.34
   0 -24   5    5.49    3.13
   0 -25  -5    4.06    4.52
   0  25  -5    4.31    4.30
   0  25  -5    4.31    3.67
   0  25   5    3.30    5.14
   0  25   5    3.45   12.21
   0 -25  -5    4.37    2.93
   0 -25   5    0.01    2.93
   0  26   5   35.24   11.56
   0  26   5   18.40   27.68
   0  26  -5   43.66    9.58
   0 -26  -5   43.29   10.17
   0 -26   5   48.04    7.35
   0  26  -5   37.21    8.72
   0  27  -5    0.34    2.70
   0  27   5   -1.99    3.75
   0 -27  -5    0.93    3.38
   0  27  -5   -0.45    3.00
   0  27   5    1.95    9.41
   0 -27   5    3.28    2.30
   0  28  -5    0.97    2.93
   0  28   5    5.99    9.29
   0 -28   5   -0.05    2.07
   0 -28  -5    2.58    6.18
   0  28  -5    1.88    2.75
   0 -29  -5    0.20    3.85
   0  29  -5    3.83    2.70
   0 -29   5   -0.32    2.10
   0  29  -5   -0.13    2.91
   0  29   5    1.26    8.97
   0  30  -5    0.28    3.33
   0  30  -5    2.54    2.85
   0 -30  -5    0.03    3.96
   0  30   5    1.96   14.90
   0 -30   5   -0.11    2.17
   0  31   5   -0.70    6.77
   0 -31   5   -0.09    2.32
   0 -31  -5   -0.05    4.24
   0  31  -5   -0.16    3.47
   0  31  -5    3.62    2.97
   0  32  -5   -0.39    2.71
   0 -32  -5   -0.13    3.88
   0  32   5   -1.83    3.92
   0  32   5   -1.17    6.87
   0  32  -5    0.00    3.28
   0 -32   5   -0.04    2.04
   0  33  -5   -0.08    2.89
   0 -33   5   -0.29    2.03
   0  33   5   -0.93    6.56
   0 -33  -5   -0.18    4.77
   0  33   5    3.75    4.03
   0  33  -5    0.50    3.50
   0  34   5    0.66    7.80
   0 -34   5   13.81    3.58
   0 -34  -5   -0.21    9.35
   0  34  -5   -0.16    5.46
   0  34   5    9.56   11.81
   0  34  -5   -0.03    6.97
   0 -35  -5   -3.80    5.85
   0  35  -5   -0.01    4.58
   0  35   5    0.53    5.49
   0  35   5   -8.55    6.76
   0  35  -5    0.43    3.54
   0  36   5    2.72    7.52
   0 -36  -5   14.09    8.13
   0  36  -5    2.32    4.42
   0 -37  -5   -6.26    7.01
   0  37   5    3.67    5.92
   0  37  -5    6.29    5.79
   0  38  -5   11.19    8.43
   0 -38  -5    5.70    9.97
   0   0  -6  340.99   24.69
   0   0   6  333.99   36.13
   0   0  -6  366.07   24.33
   0   0   6  330.20   29.95
   0   0  -6  447.31   51.20
   0   0  -6  375.56   32.79
   0   0  -6  316.38   26.61
   0   0   6  245.97   24.16
   0   0  -6  369.89   35.25
   0   0   6  334.85   33.12
   0  -1   6   22.52    5.70
   0   1  -6   35.40    7.00
   0  -1  -6   31.14    2.91
   0   1  -6   33.94    5.60
   0   1   6   31.94   13.57
   0   1   6   24.70    5.66
   0  -1  -6   36.80    8.69
   0  -1   6   30.18    7.59
   0  -1  -6   28.83    5.31
   0  -1  -6   33.07    6.75
   0   1   6   40.82   20.14
   0   1  -6   38.21   13.98
   0  -1  -6   43.68   13.69
   0   1  -6   38.53    8.56
   0   1  -6   28.49    3.88
   0   1   6   26.94    5.99
   0  -1   6   33.16    8.08
   0  -1   6   33.25    6.68
   0  -1  -6   30.25    3.26
   0   1  -6   25.73    3.31
   0   2  -6   19.03    2.84
   0  -2   6   17.15    5.27
   0  -2  -6   20.97    4.64
   0   2   6   25.31   11.30
   0   2  -6   17.90   11.48
   0   2  -6   17.52    4.46
   0   2   6   13.55    4.70
   0   2   6   16.96    5.04
   0  -2  -6   22.51    7.04
   0  -2   6   18.57    6.66
   0   2  -6   21.52    5.68
   0  -2  -6   24.26   11.08
   0  -2   6   10.89    4.56
   0   2   6   19.65    6.79
   0   2  -6   21.85    6.72
   0   2  -6   17.97    3.31
   0  -2  -6   18.88    5.45
   0  -2   6   18.82    5.55
   0  -3   6   36.34    7.29
   0   3  -6   56.18    7.71
   0  -3   6   62.76    8.21
   0  -3  -6   60.36    8.63
   0  -3  -6   77.54   16.86
   0  -3   6   58.34   10.54
   0   3  -6   63.65    9.19
   0   3   6   64.84   18.72
   0   3  -6   65.22   10.65
   0  -3   6   56.81    8.38
   0   3   6   50.04    8.17
   0  -3  -6   65.26    7.71
   0  -3  -6   60.99   11.05
   0   3  -6   58.98    5.39
   0   3   6   49.26    7.58
   0   4  -6   31.52    6.67
   0  -4  -6   31.67   14.39
   0  -4  -6   31.24    5.47
   0   4  -6   29.85    7.73
   0  -4   6   24.94    6.00
   0   4   6   24.11    5.25
   0  -4  -6   29.69    6.18
   0   4   6   34.08   14.56
   0  -4  -6   38.29   12.81
   0  -4   6   15.18    5.16
   0   4  -6   28.82    5.60
   0   4   6   25.69    6.08
   0   4  -6   30.83    4.01
   0  -4   6   27.95    7.67
   0   5  -6    0.62    1.38
   0  -5  -6    0.36    4.33
   0  -5   6   -2.00    6.56
   0   5   6    1.71    5.37
   0  -5   6    0.46    1.99
   0   5  -6    0.17    2.55
   0  -5  -6   -0.20    2.88
   0  -5  -6    0.46    1.75
   0   5   6   -0.50    2.09
   0   5  -6    0.66    1.92
   0  -5   6   -0.01    2.64
   0   5  -6    0.82    2.20
   0  -6   6   81.32   26.94
   0   6  -6   80.62   11.48
   0   6  -6   76.82    7.71
   0   6  -6   83.97   10.46
   0  -6   6   75.90   11.81
   0  -6  -6   84.82   13.60
   0  -6  -6  109.84   19.56
   0   6   6   77.62   24.66
   0  -6  -6   79.69    8.93
   0  -6  -6   87.03   10.56
   0   6   6   68.81    9.96
   0  -6   6   68.23    9.50
   0  -7   6    1.45    5.20
   0   7   6    0.21    5.14
   0   7  -6    0.62    1.75
   0  -7  -6    0.28    1.79
   0  -7  -6   -0.91    1.51
   0  -7  -6    0.93    3.60
   0   7  -6   -0.14    1.95
   0  -7  -6   -0.32    1.43
   0   7   6    0.11    1.84
   0   7  -6    0.38    2.03
   0   7   6   -0.01    1.37
   0  -7   6   -0.34    1.67
   0  -7  -6   -1.09    2.54
   0  -7   6   -0.41    2.12
   0   7  -6    0.11    1.37
   0   8   6    6.92   13.23
   0  -8   6   11.47    5.22
   0   8  -6   11.00    4.54
   0  -8   6   11.40   12.35
   0  -8  -6   13.34    6.41
   0   8   6    9.76    4.67
   0   8  -6   11.68    3.87
   0  -8  -6    9.80    3.78
   0  -8  -6   11.83    3.62
   0  -8   6    8.63    4.17
   0  -8  -6   14.71    8.75
   0   8   6    6.62    3.31
   0   8  -6    9.58    5.01
   0  -8  -6   13.57    4.35
   0  -9   6  194.84   19.27
   0   9  -6  208.08   19.34
   0  -9  -6  236.86   21.31
   0   9   6  182.84   46.20
   0   9  -6  235.05   24.30
   0  -9  -6  221.00   19.52
   0  -9   6  226.87   23.37
   0   9   6  192.47   17.78
   0  -9  -6  237.17   19.32
   0   9  -6  203.64   19.86
   0  -9  -6  219.67   25.08
   0  -9  -6  301.20   35.54
   0  -9   6  220.09   41.51
   0 -10   6   17.36    5.22
   0 -10  -6   18.43    7.72
   0 -10  -6   22.84    5.41
   0  10   6   14.67    3.87
   0  10  -6   20.66    6.58
   0 -10  -6   20.59    4.51
   0  10  -6   17.07    5.52
   0  10  -6   17.46    5.08
   0 -10  -6   20.19    4.81
   0  10  -6   20.20    5.52
   0  10   6   14.07   16.82
   0 -10  -6   28.39   10.17
   0 -10   6   23.53   12.98
   0 -11  -6  302.71   35.29
   0  11  -6  220.24   21.44
   0 -11  -6  218.46   19.55
   0  11   6  203.40   25.97
   0  11  -6  227.89   23.53
   0 -11  -6  226.48   20.26
   0 -11  -6  249.61   19.80
   0  11   6  179.39   47.50
   0  11  -6  195.89   19.97
   0  11  -6  197.78   20.11
   0 -11  -6  223.41   26.48
   0 -11   6  223.38   37.61
   0  12   6    7.42   16.68
   0  12  -6   10.85    4.60
   0  12  -6   13.00    5.10
   0 -12  -6   17.22    3.84
   0  12   6   10.59    4.49
   0 -12   6   16.99   11.46
   0  12  -6   12.75    5.42
   0 -12  -6   14.61    4.30
   0 -12  -6   17.71    7.22
   0 -12  -6   18.60    8.98
   0 -12  -6   14.17    4.00
   0  12  -6   13.11    4.88
   0 -13  -6   -0.12    1.60
   0 -13   6   -1.32    4.45
   0  13  -6    1.18    2.14
   0  13  -6    0.66    1.83
   0  13   6   -0.04    1.82
   0 -13  -6   -0.43    3.45
   0  13  -6   -0.04    2.08
   0  13   6    2.04    7.13
   0 -13  -6    1.04    2.93
   0 -13  -6   -0.01    1.54
   0  13  -6   -0.14    1.83
   0 -14  -6    7.16    3.05
   0 -14  -6    5.55    6.17
   0  14   6    4.05    3.50
   0  14  -6    4.03    4.05
   0  14  -6    4.00    3.43
   0  14  -6    4.04    3.31
   0 -14  -6    4.00    2.78
   0 -14  -6    7.80    5.46
   0  14  -6    3.10    3.37
   0 -14   6    5.26   12.83
   0  14   6    6.59   13.52
   0  15  -6    4.08    3.28
   0  15  -6    5.76    3.49
   0 -15   6    2.59    3.83
   0 -15  -6    5.68    2.89
   0  15  -6    3.54    3.09
   0 -15  -6    5.13    5.35
   0  15   6   -1.10   13.85
   0 -15  -6    3.43    4.66
   0  15  -6    5.38    4.18
   0  15   6    3.49    3.56
   0 -15  -6    5.55    5.96
   0  16  -6    1.43    2.68
   0  16   6    0.89    3.13
   0  16   6   -1.82   11.75
   0 -16  -6    1.87    4.63
   0  16  -6    1.53    3.67
   0 -16   6    2.41    3.16
   0 -16  -6    1.93    4.38
   0  16  -6    1.66    2.99
   0 -16  -6    2.38    2.28
   0 -16  -6    3.62    4.87
   0  16  -6    2.66    2.53
   0  17   6   34.69   29.50
   0  17  -6   40.62    8.55
   0 -17  -6   45.75    6.56
   0  17  -6   42.16    8.04
   0 -17  -6   51.80   12.29
   0 -17  -6   42.88    7.73
   0  17   6   36.87    8.87
   0 -17   6   41.30    8.59
   0 -17  -6   67.41   13.56
   0  17  -6   44.29   18.30
   0  17  -6   43.08    7.50
   0 -18  -6  264.49   32.48
   0 -18   6  247.16   26.66
   0  18  -6  223.95   25.08
   0 -18  -6  249.27   24.87
   0  18  -6  239.22   22.81
   0 -18  -6  350.95   37.30
   0  18  -6  243.23   27.66
   0  18   6  180.33   63.73
   0 -18  -6  244.53   22.34
   0  18  -6  212.95   22.30
   0  18   6  202.69   25.44
   0  19  -6    2.00    2.83
   0 -19  -6    0.67    4.95
   0  19  -6    3.12    2.53
   0 -19  -6    1.57    2.30
   0 -19  -6    4.93    4.67
   0  19   6    2.58    3.56
   0 -19   6    0.59    3.16
   0 -19  -6    1.09    2.68
   0  19  -6    2.09    4.33
   0  19   6   -0.12   13.09
   0  20   6  103.99   17.02
   0 -20  -6  129.03   12.90
   0  20  -6  111.26   14.73
   0  20  -6  132.34   19.76
   0 -20  -6  115.69   14.56
   0 -20   6  146.48   17.13
   0  20  -6  118.79   13.60
   0 -20  -6  175.54   23.12
   0  20   6   94.73   50.46
   0 -20  -6  141.23   22.56
   0  21  -6  459.22   43.22
   0 -21   6  578.15   54.10
   0  21  -6  416.66   42.08
   0 -21  -6  518.03   58.88
   0 -21  -6  385.96   42.51
   0  21   6  377.74   46.31
   0  21   6  356.92   96.62
   0  21  -6  477.34   52.47
   0  21  -6  436.38   48.31
   0 -21  -6  702.43   69.98
   0  22  -6  161.67   23.24
   0  22   6  126.41   20.88
   0 -22  -6  163.31   25.33
   0 -22   6  210.74   21.20
   0 -22  -6  206.67   25.58
   0  22  -6  142.73   20.61
   0  22  -6  140.59   15.13
   0  22   6  116.79   53.40
   0  23  -6  115.58   16.28
   0 -23  -6  137.92   20.30
   0  23   6   97.21   45.25
   0 -23   6  115.41   12.63
   0  23   6  118.04   18.22
   0 -23  -6  168.55   20.23
   0  23  -6  129.00   17.86
   0  23  -6  115.61   12.11
   0  24   6   70.72   36.40
   0 -24   6   76.71   10.72
   0  24  -6   94.67   14.11
   0 -24   6   73.87    9.02
   0 -24  -6  105.35   16.39
   0  24   6   79.42   15.64
   0  24  -6   88.14   13.05
   0  25   6   12.26   22.24
   0  25  -6   26.37    7.06
   0 -25  -6   28.54    9.30
   0  25  -6   25.10    7.75
   0 -25   6   17.93    4.89
   0  26  -6    3.62    3.87
   0 -26   6    0.32    2.45
   0  26   6    3.17   11.30
   0 -26  -6    0.05    4.49
   0  26  -6    3.45    3.28
   0  27  -6    6.48    4.12
   0  27   6    3.08   12.38
   0 -27  -6    0.14    5.02
   0  27  -6    4.42    3.60
   0 -27   6   -0.30    2.68
   0  28   6    3.25    3.63
   0  28   6   -3.39   16.01
   0 -28  -6   -0.09    4.79
   0  28  -6    3.83    3.95
   0 -28   6   -0.32    2.45
   0  28  -6    1.71    3.39
   0  29  -6   16.27    6.39
   0  29  -6   18.23    6.72
   0  29   6   16.26    6.59
   0  29   6    8.08   15.94
   0 -29  -6   -0.05    9.08
   0 -29   6   11.00    4.20
   0  30  -6    7.75    4.43
   0 -30  -6    0.24    6.30
   0  30   6    6.93   11.55
   0  30  -6    0.39    5.06
   0 -30   6   -0.11    2.79
   0  30   6    9.08    4.54
   0 -31   6    5.60    4.20
   0 -31  -6    0.25    7.01
   0  31   6    1.24    4.16
   0  31  -6    0.91    3.97
   0  31   6   -1.43   10.15
   0  31  -6    0.00    5.55
   0  32   6    0.22    3.20
   0  32   6    1.07    7.23
   0  32  -6    0.30    3.30
   0 -32  -6   -0.11    5.05
   0  32  -6    0.14    4.18
   0  33  -6   -8.67    4.31
   0  33   6    0.74    3.93
   0  33  -6    0.41    5.08
   0  33   6    3.09    8.87
   0 -33  -6    7.93    6.31
   0 -34  -6   -9.76    8.93
   0  34  -6   -1.99    7.30
   0  34   6  -10.25   11.94
   0  34  -6   -2.72    6.08
   0 -35  -6   -6.08    8.91
   0  35  -6   -4.88    7.33
   0  35   6    1.05   11.63
   0 -36  -6   -9.02   10.58
   0  36  -6   -8.25   10.60
   0   0  -7    1.83    2.16
   0   0   7    0.42    3.50
   0   0  -7    1.50    3.58
   0   0  -7    1.16    3.12
   0   1  -7   82.78   13.15
   0   1  -7   77.27    9.34
   0  -1  -7   80.62   13.22
   0   1  -7   81.73   11.55
   0  -1  -7   80.04   11.47
   0  -1  -7   95.02   23.23
   0   1   7   74.54   14.44
   0  -1  -7   71.54    8.51
   0   2   7    7.02    6.80
   0  -2  -7    8.66    5.72
   0  -2  -7    9.87    3.49
   0   2  -7    7.23    3.64
   0  -2  -7    9.41    4.64
   0   2  -7    8.29    5.43
   0  -2  -7    8.58   10.13
   0   2  -7    9.48    4.89
   0   3  -7   13.22    6.33
   0  -3  -7   12.43    3.80
   0   3  -7   12.56    2.95
   0   3  -7   12.00    4.33
   0  -3  -7   13.04    5.18
   0  -3  -7   12.90   11.38
   0  -3   7   14.06   16.39
   0  -3  -7   13.52    6.56
   0   3   7   11.30    8.09
   0   3  -7   14.23    5.51
   0   3  -7   12.34    4.22
   0  -4  -7   48.62   16.60
   0  -4  -7   39.88    7.83
   0  -4  -7   37.96    9.64
   0   4  -7   38.37    7.34
   0  -4   7   41.37   23.49
   0   4  -7   41.45    8.38
   0   4  -7   39.87    6.98
   0   4  -7   37.40   14.50
   0  -4  -7   36.37    5.74
   0   4  -7   38.19    5.25
   0   4   7   34.99   12.77
   0  -5  -7   10.77    6.60
   0   5   7   10.38   19.40
   0  -5   7    9.88   14.35
   0   5  -7   10.60    3.10
   0   5  -7    8.88    5.20
   0  -5  -7   12.30   10.27
   0   5  -7    7.79    4.10
   0  -5  -7   10.67    6.02
   0   6  -7    2.12    2.83
   0   6   7    2.57    8.87
   0  -6  -7    2.28    2.53
   0  -6  -7    4.38    6.79
   0  -6  -7    3.34    4.10
   0  -6   7    0.70    9.58
   0   6  -7    2.29    3.55
   0   6  -7    2.07    2.09
   0  -7  -7    2.01    3.45
   0   7  -7    1.00    2.89
   0   7  -7    0.82    2.75
   0   7  -7    0.75    1.88
   0  -7  -7    1.41    2.04
   0   7  -7   -0.04    4.35
   0   7   7    2.29    7.35
   0  -7   7   -0.51    7.51
   0  -7  -7    0.97    5.55
   0  -7  -7   -0.01    2.41
   0   8  -7    5.42    3.96
   0  -8  -7   -0.05    3.39
   0  -8   7    4.96   10.38
   0  -8  -7    5.31    2.96
   0   8  -7    5.31    3.31
   0   8  -7    6.04    3.00
   0  -8  -7    5.46    5.20
   0   8   7    3.60   11.25
   0  -8  -7    8.81    7.93
   0   8  -7    5.25    4.21
   0   9  -7   15.86    6.12
   0   9  -7   16.42    5.00
   0  -9   7   26.61   14.64
   0   9  -7   14.06    4.96
   0  -9  -7   27.86   11.39
   0   9   7   19.48   17.39
   0  -9  -7   17.57    4.41
   0   9  -7   17.38    6.02
   0  -9  -7   17.53    5.06
   0  -9  -7   23.52    7.91
   0  10  -7   -0.09    2.24
   0 -10  -7   -1.03    4.25
   0 -10  -7   -0.74    2.97
   0 -10  -7   -0.03    1.80
   0  10  -7    0.29    3.01
   0 -10   7   -0.29    5.24
   0  10  -7    0.30    1.78
   0 -10  -7    0.89    1.57
   0  10   7   -2.99    6.84
   0 -11  -7   35.09    6.10
   0  11  -7   28.86    6.87
   0 -11   7   31.06   16.93
   0  11  -7   31.79    7.84
   0  11  -7   31.50    7.75
   0 -11  -7   30.33    6.21
   0 -11  -7   43.87   14.40
   0  11   7   28.43   24.10
   0 -11  -7   34.41   10.42
   0  11  -7   32.41   11.00
   0  12  -7   73.73   11.80
   0  12  -7   70.73   18.23
   0  12  -7   61.96   10.17
   0  12  -7   69.12   11.48
   0 -12  -7   94.48   19.69
   0 -12  -7   69.74   14.46
   0  12   7   59.65   33.67
   0 -12  -7   71.73    9.38
   0 -12   7   77.42   23.10
   0 -12  -7   68.02    8.96
   0  13  -7  117.52   15.28
   0  13  -7  120.27   15.06
   0 -13  -7  116.89   19.31
   0 -13   7  138.88   29.12
   0 -13  -7  111.27   11.93
   0  13  -7  103.25   13.97
   0  13  -7  108.90   21.65
   0 -13  -7  156.72   25.14
   0 -13  -7  125.20   13.11
   0  13   7  103.35   42.58
   0 -14  -7    5.43    5.49
   0 -14  -7    4.31    3.06
   0  14  -7    2.46    4.08
   0  14  -7    3.09    3.51
   0  14   7    3.79   13.67
   0 -14  -7    5.08    6.60
   0 -14   7    2.34    4.14
   0  14  -7    3.50    3.43
   0 -14  -7    4.45    2.83
   0  14  -7    2.35    3.46
   0 -15  -7    0.42    1.55
   0  15  -7    0.97    1.82
   0  15   7    3.33    7.91
   0 -15   7   -1.14    2.29
   0  15  -7    0.57    1.93
   0  15  -7   -1.04    1.92
   0 -15  -7   -0.66    1.53
   0  15  -7   -1.13    2.37
   0 -15  -7   -0.12    3.51
   0 -15  -7    1.20    3.08
   0 -16  -7  200.27   25.86
   0 -16  -7  136.43   13.39
   0  16  -7  128.82   14.72
   0  16  -7  125.32   15.93
   0 -16   7  113.51   16.40
   0 -16  -7  123.61   13.86
   0  16  -7  125.36   15.60
   0  16   7  120.19   49.06
   0 -16  -7  140.30   21.74
   0  16  -7  134.76   17.09
   0  17  -7    7.08    4.14
   0  17  -7    7.18    6.43
   0  17  -7    8.27    5.04
   0  17  -7    5.60    4.31
   0 -17  -7    9.69    7.14
   0 -17  -7    8.02    6.71
   0 -17   7    8.31    4.76
   0  17   7    7.54   17.44
   0 -17  -7    6.47    2.97
   0 -18  -7    5.54    5.75
   0 -18   7    6.21    4.05
   0 -18  -7    4.43    2.58
   0  18  -7    4.26    4.37
   0  18  -7    4.51    3.85
   0  18  -7    2.58    3.29
   0  18   7    6.83   15.10
   0  18  -7    4.25    3.31
   0 -18  -7    6.55    5.84
   0 -19   7    1.53    2.25
   0 -19  -7    0.16    3.21
   0  19  -7   -3.37    2.59
   0  19  -7    1.09    1.83
   0 -19  -7    1.26    3.16
   0  19  -7   -0.26    2.66
   0  19   7   -2.50    8.18
   0  19  -7    0.79    1.85
   0 -19  -7    0.17    1.43
   0 -20  -7  101.05   16.03
   0 -20   7   87.49   12.34
   0  20  -7   75.45    9.71
   0  20  -7   69.87   10.15
   0  20  -7   76.74   13.23
   0  20  -7   84.03   13.10
   0 -20  -7   79.44   15.59
   0 -21  -7  131.68   19.11
   0  21  -7   98.90   11.67
   0  21  -7   95.75   15.19
   0 -21   7  122.34   14.26
   0  21  -7   86.04   14.36
   0  21  -7   82.57   10.94
   0 -21  -7  102.39   17.47
   0  22  -7    5.79    3.06
   0 -22  -7    7.88    5.39
   0  22  -7    3.60    4.83
   0 -22  -7    7.17    6.10
   0 -22   7    8.68    4.09
   0  22  -7    5.83    5.30
   0 -23   7   -0.38    1.62
   0  23  -7   -0.64    2.68
   0  23  -7   -0.30    2.97
   0  23  -7   -0.21    1.57
   0 -23  -7    0.12    3.50
   0 -23  -7   -2.07    2.79
   0 -23   7   -0.09    1.82
   0  24  -7   -0.05    3.60
   0  24  -7    1.55    3.33
   0 -24   7    0.12    2.30
   0 -24   7    1.78    1.75
   0 -24  -7   -0.12    4.24
   0  24   7    1.04   15.39
   0  25  -7    8.58    4.13
   0 -25  -7    0.24    5.42
   0  25   7    9.56   10.35
   0  25  -7    0.47    4.45
   0 -25   7    0.16    2.87
   0  26  -7    0.51    2.29
   0  26  -7    0.09    2.97
   0 -26  -7   -0.30    3.28
   0  26   7    1.21    6.23
   0 -26   7   -0.20    1.55
   0 -27   7    0.11    1.58
   0  27   7    3.45    6.92
   0  27  -7    0.43    2.70
   0  27  -7   -0.70    2.49
   0 -27  -7    0.08    3.56
   0  28   7   -0.11   11.68
   0  28  -7    3.16    4.51
   0  28  -7    3.55    4.12
   0 -28   7   -0.24    2.08
   0 -28  -7    0.13    6.22
   0  29  -7    1.71    5.13
   0  29   7    3.46   13.43
   0 -29  -7    0.46    7.26
   0  29  -7    2.04    8.44
   0  30   7    2.99   13.14
   0  30  -7    2.18    8.09
   0  30  -7    1.84    5.72
   0 -30  -7   -0.28    7.20
   0  31  -7    7.09    9.60
   0  31   7   13.35   21.26
   0 -31  -7   12.21   12.11
   0  31  -7   19.99    9.94
   0 -32  -7   -3.95    8.17
   0  32  -7    1.33    6.37
   0  32  -7   -1.67    6.75
   0  32   7  -21.68   13.25
   0  33  -7    2.55    9.29
   0 -33  -7   34.92   11.38
   0  33   7   17.90   18.11
   0  33  -7   -2.93    8.62
   0 -34  -7   10.65   16.56
   0  34  -7    7.25    9.34
   0  34   7   11.21   14.65
   0  34  -7    2.14    7.51
   0   0  -8    0.92    2.13
   0   0  -8   -0.03    2.81
   0   0   8    3.01    9.58
   0   0  -8    1.20    3.46
   0   1  -8   -0.01    4.84
   0  -1  -8    7.06    5.63
   0   1  -8   10.25    5.71
   0   1  -8   10.18    3.71
   0  -1  -8   -0.12    4.70
   0  -1  -8   10.25    3.46
   0  -1   8    6.73   15.22
   0   2  -8   41.07    9.33
   0  -2  -8   39.95   10.63
   0  -2  -8   40.13    6.62
   0   2  -8   46.37    7.87
   0   2  -8   44.95   16.32
   0  -2   8   46.51   26.26
   0  -2  -8   40.09    8.79
   0  -3  -8   75.67   11.68
   0  -3  -8   74.86   14.13
   0   3  -8   77.41   12.84
   0   3  -8   77.90   13.21
   0   3  -8   85.42   11.44
   0  -3   8   80.33   33.28
   0  -3  -8   75.52    8.97
   0   4   8   20.11   10.02
   0  -4  -8   25.32    8.81
   0  -4   8   30.45   20.56
   0   4  -8   26.06    7.87
   0  -4  -8   24.28    4.87
   0   4  -8   27.94   13.39
   0  -4  -8   23.47    6.79
   0   4  -8   23.52    6.01
   0   5   8    1.99    3.51
   0  -5  -8   -0.03    2.16
   0   5  -8    0.59    2.46
   0  -5  -8   -0.28    5.08
   0  -5   8    5.33    6.73
   0  -5  -8   -0.01    2.87
   0   5  -8   -3.22    2.96
   0  -5  -8    0.78    1.43
   0   5  -8   -0.87    2.39
   0   6  -8    3.62    4.24
   0  -6  -8    3.81    8.72
   0   6   8    3.08    6.81
   0  -6  -8    3.47    4.89
   0   6  -8    3.37    2.18
   0   6  -8    3.29    4.21
   0  -6  -8   -0.11    3.64
   0  -6   8    4.52   11.05
   0   6  -8    4.88    3.12
   0  -6  -8    5.06    2.58
   0   7  -8   47.66    6.48
   0   7  -8   47.96   10.00
   0  -7  -8   45.33    8.37
   0  -7  -8   45.66    6.23
   0  -7  -8   61.65   19.61
   0   7  -8   46.59    9.72
   0  -7  -8   49.10   11.47
   0  -7   8   46.42   23.18
   0   7  -8   43.01    7.94
   0  -8  -8   17.55    7.63
   0   8  -8   12.44    5.05
   0   8  -8   17.39    4.17
   0  -8  -8   13.89    3.76
   0  -8  -8   24.03   12.75
   0  -8   8   19.65   15.00
   0  -8  -8   16.05    5.52
   0   8  -8   14.21    6.22
   0   8  -8   15.39    6.43
   0  -9  -8   37.73    7.47
   0  -9  -8   38.12   10.47
   0   9  -8   37.04    8.52
   0  -9  -8   34.08    5.33
   0  -9   8   37.29   18.88
   0  -9  -8   44.64   16.93
   0   9  -8   36.94    6.02
   0   9  -8   29.44    7.06
   0   9  -8   35.69    8.52
   0  10  -8   59.88   10.75
   0 -10  -8   55.51   12.83
   0  10  -8   58.48   10.65
   0 -10  -8   58.68    8.89
   0  10  -8   50.16    8.80
   0 -10   8   61.11   21.95
   0 -10  -8   54.72    6.79
   0  10  -8   61.48    8.41
   0  11  -8   24.53    6.59
   0  11  -8   29.21    7.41
   0 -11  -8   54.77   16.76
   0 -11  -8   31.44    9.71
   0  11  -8   31.21    7.66
   0  11  -8   32.16    6.48
   0 -11   8   35.11   16.46
   0 -11  -8   31.99    6.35
   0 -11  -8   27.19    7.41
   0  12   8   40.08   20.49
   0 -12   8   63.15   19.76
   0 -12  -8   51.94   12.21
   0  12  -8   53.58   10.15
   0 -12  -8   54.63    8.01
   0  12  -8   54.97    8.89
   0  12  -8   48.43    9.00
   0  12  -8   49.42   14.81
   0 -12  -8   74.94   17.96
   0  13  -8   67.66   10.55
   0  13   8   57.96   23.16
   0 -13  -8   70.16    8.91
   0  13  -8   71.64   11.29
   0 -13   8   51.09   11.77
   0 -13  -8   71.19   13.79
   0 -13  -8   98.72   19.17
   0  13  -8   66.02   10.55
   0  13  -8   75.60   10.97
   0 -14  -8   93.88   10.92
   0  14  -8   85.86   11.76
   0  14   8   72.14   26.01
   0  14  -8   85.58   11.72
   0  14  -8   84.40   12.08
   0 -14  -8   78.04   23.98
   0 -14   8   68.56   12.83
   0 -14  -8  125.91   20.60
   0  14  -8   85.97   12.13
   0  15  -8    4.00    3.24
   0 -15   8    2.87    3.96
   0  15   8    5.16    9.08
   0  15  -8    3.59    3.70
   0  15  -8    2.47    3.50
   0 -15  -8    4.03    2.81
   0 -15  -8    5.59    6.04
   0 -15  -8    5.70    8.43
   0  15  -8    3.30    3.06
   0  16  -8   17.67    8.25
   0 -16  -8   18.43    4.41
   0 -16  -8   28.15    9.22
   0  16  -8   13.76    5.56
   0 -16   8   15.06    6.10
   0  16  -8   15.59    4.72
   0  16  -8   17.96    6.14
   0 -16  -8   18.59    7.77
   0  16   8   13.75   13.90
   0  17  -8   61.44    9.01
   0 -17  -8   72.14   14.47
   0 -17  -8   68.60    8.47
   0 -17   8   68.39   11.21
   0 -17  -8  100.80   17.48
   0  17  -8   76.91   12.42
   0  17  -8   69.53    9.98
   0  18  -8    4.95    2.95
   0 -18   8    2.83    3.47
   0 -18  -8    4.52    4.85
   0  18  -8    2.03    2.49
   0  18  -8    3.55    3.47
   0 -18  -8    6.68    5.05
   0 -18  -8   -0.29    2.47
   0  18  -8    0.04    3.96
   0 -19  -8   -0.92    3.54
   0  19  -8   -0.13    2.01
   0  19  -8    1.64    2.59
   0 -19  -8    0.05    1.66
   0  19   8   -0.08    6.27
   0 -19  -8    2.03    3.55
   0  19  -8   -0.16    2.79
   0  19  -8    0.76    1.79
   0 -19   8    0.32    2.50
   0 -20   8    6.63    4.22
   0 -20  -8    6.55    6.31
   0  20  -8   -0.29    5.05
   0  20  -8    5.88    3.30
   0  20   8    0.00   11.35
   0  20  -8    6.58    4.70
   0  20  -8    5.58    3.18
   0 -20  -8    7.29    5.80
   0  21  -8   34.54    9.21
   0 -21  -8   31.29   10.96
   0  21   8    0.00   20.70
   0 -21   8   26.83    7.06
   0 -21  -8   33.35   10.79
   0  21  -8   24.31    5.56
   0  21  -8   25.65    8.50
   0 -22   8    4.59    2.84
   0 -22   8   -0.11    2.89
   0 -22  -8    5.46    4.54
   0  22  -8   -0.08    4.77
   0 -22  -8   -0.26    5.80
   0  22   8    0.00   10.58
   0  22  -8    4.54    4.26
   0  22  -8    4.83    2.79
   0 -23   8    0.24    2.01
   0  23   8   -0.05    7.72
   0  23  -8    0.91    1.66
   0 -23  -8   -1.46    2.89
   0  23  -8    0.04    3.43
   0  23  -8    1.10    3.00
   0 -23   8    0.72    1.72
   0 -23  -8   -0.13    4.14
   0  24   8    0.03   12.11
   0  24  -8    4.79    4.80
   0 -24  -8   -0.22    6.58
   0 -24   8    2.47    2.04
   0 -24   8   -0.13    2.60
   0  25  -8    8.38    8.10
   0 -25  -8    0.00   11.00
   0 -25   8   15.63    3.96
   0  25   8   -0.16   20.60
   0  25  -8    0.62    9.21
   0  26   8    2.25   18.34
   0 -26   8    8.91    3.25
   0  26  -8   -0.20    7.70
   0  26  -8    7.29    7.22
   0 -26  -8    0.12    9.67
   0  27  -8    0.42    4.64
   0  27   8   -0.84   10.92
   0 -27  -8    0.21    9.92
   0  27  -8   -1.63    4.34
   0  28   8   16.00   19.51
   0 -28  -8    9.73   10.13
   0  28  -8    2.76   17.43
   0  28  -8    6.54   13.31
   0  29  -8    6.22   10.71
   0  29   8   35.40   21.90
   0 -30  -8    3.26    6.12
   0  30   8   14.06   11.39
   0  30  -8   -7.79    5.66
   0  31  -8    3.31    5.50
   0  31  -8   -3.16    5.96
   0 -31  -8    0.57    5.46
   0   0  -9    0.33    1.58
   0   0   9   -0.71    6.37
   0   0  -9    0.00    4.03
   0   0  -9    0.11    2.45
   0   1   9    4.80    9.81
   0   1  -9    0.03    3.45
   0   1  -9    3.58    3.68
   0  -1  -9    4.09    6.43
   0  -1  -9   -0.01    3.43
   0  -1   9    3.72    9.51
   0   1  -9    4.04    4.52
   0  -1  -9    3.76    2.59
   0  -2   9    2.46    9.98
   0  -2  -9    4.89    4.52
   0  -2  -9   -0.03    3.78
   0   2  -9    4.99    2.59
   0   2  -9    3.35    3.99
   0   2   9    4.52   10.69
   0   2  -9   -0.03    3.72
   0  -2  -9    5.21    2.68
   0   3  -9   60.17    8.33
   0  -3   9   57.06   24.32
   0  -3  -9   69.45    8.42
   0  -3  -9   65.49   12.11
   0   3  -9   62.72   10.69
   0   3   9   56.42   26.90
   0  -3  -9   65.20   10.48
   0   3  -9   64.84   10.94
   0   4   9    0.96   10.80
   0   4  -9    4.45    3.71
   0  -4  -9    3.79    2.50
   0  -4  -9    0.01    3.55
   0   4  -9    2.83    3.76
   0  -4  -9    3.67    4.37
   0  -4   9    5.09    9.05
   0   4  -9    3.53    2.75
   0  -5  -9    0.00    2.29
   0   5  -9    0.63    1.83
   0   5  -9   -0.55    2.45
   0  -5  -9    0.49    1.57
   0  -5  -9    0.79    2.89
   0   5  -9    0.36    2.39
   0  -6  -9   -0.32    1.21
   0  -6  -9    0.03    1.79
   0   6  -9   -0.46    1.91
   0   6  -9    0.34    2.03
   0  -6  -9   -0.16    2.32
   0   6  -9    0.51    1.55
   0  -7  -9   40.26   10.22
   0  -7   9   36.92   19.11
   0   7   9   33.61   10.89
   0   7  -9   41.36    8.48
   0   7  -9   38.08    9.05
   0   7  -9   42.57    7.70
   0  -7  -9   41.80    7.87
   0  -8  -9    3.85    4.70
   0   8  -9    6.01    3.88
   0  -8  -9   -0.04    3.75
   0  -8   9    5.30    8.37
   0   8  -9    2.84    2.92
   0   8  -9    3.72    3.60
   0   9  -9   18.86    6.35
   0  -9  -9   17.82    7.87
   0  -9  -9   19.19    6.14
   0   9  -9   17.92    5.22
   0  -9   9   19.59   14.01
   0   9  -9   17.18    6.33
   0 -10   9    5.16    6.12
   0 -10  -9   -0.01    2.64
   0  10  -9   -0.09    2.84
   0  10  -9    0.99    4.75
   0  10  -9    2.63    2.32
   0  10  -9   -0.24    1.96
   0 -10  -9    2.64    3.70
   0  11  -9    2.72    2.60
   0 -11  -9    0.01    2.74
   0  11  -9    0.21    2.26
   0  11  -9   -0.08    2.95
   0 -11  -9    3.95    4.00
   0 -11   9   -0.74    6.22
   0  11  -9    2.29    2.58
   0  12  -9    0.11    3.13
   0 -12  -9   12.14    5.08
   0  12  -9   -0.22    3.58
   0  12  -9    8.26    3.45
   0  12   9   -2.22    7.43
   0  12  -9    8.50    3.43
   0 -12  -9   -0.41    3.42
   0  13  -9   21.26    6.33
   0  13  -9   16.40    6.08
   0  13  -9   20.72    5.59
   0 -13   9   18.61    7.68
   0 -13  -9   21.31    8.71
   0 -13  -9   27.24    6.50
   0  13  -9   18.61    5.39
   0  13   9   -0.53   12.64
   0 -14   9    1.72    3.21
   0  14  -9    1.22    2.16
   0 -14  -9   -0.76    2.54
   0  14   9    0.03    5.30
   0  14  -9    0.20    2.43
   0 -14  -9    0.54    3.70
   0  14  -9    1.35    2.59
   0  14  -9    0.11    2.54
   0  15   9    0.03    8.34
   0  15  -9    6.66    6.98
   0 -15   9    5.89    4.58
   0 -15  -9   -0.39    3.55
   0 -15  -9    8.22    5.58
   0  15  -9   -0.13    3.88
   0  15  -9    5.10    2.93
   0 -16  -9    3.04    4.34
   0  16  -9    1.66    2.30
   0 -16   9    0.89    3.51
   0  16  -9    1.63    3.20
   0  16  -9    0.32    3.17
   0 -16  -9    0.13    2.59
   0  16   9   -0.01    6.84
   0  17  -9    0.28    1.57
   0 -17   9   -0.86    2.45
   0 -17  -9    0.50    3.12
   0 -17  -9    0.37    1.75
   0  17  -9   -0.11    2.18
   0  17   9    0.01    5.25
   0  17  -9    0.11    2.12
   0  17  -9   -0.07    2.29
   0  18  -9   14.57    6.04
   0  18  -9    9.65    4.22
   0  18  -9   12.88    5.04
   0  18  -9   -0.29    5.95
   0  18   9    0.08   14.00
   0 -18   9   13.65    6.25
   0 -18  -9   14.30    7.91
   0 -18  -9   13.11    4.34
   0 -19   9    0.25    2.49
   0 -19  -9   -0.05    1.71
   0  19  -9   -0.58    2.01
   0 -19  -9   -0.32    4.14
   0  19  -9    0.04    2.66
   0  19  -9   -0.18    2.64
   0  19   9   -0.05    6.04
   0  20  -9    0.25    5.30
   0  20   9   -0.09   11.65
   0  20  -9    6.23    3.62
   0 -20   9    5.13    4.55
   0 -20  -9    7.62    7.94
   0  20  -9    5.08    5.14
   0 -21   9   14.31    3.75
   0  21   9   -0.09   14.05
   0  21  -9    6.02    3.91
   0 -21  -9    8.14    9.48
   0  21  -9    7.02    6.80
   0 -21   9    4.47    3.79
   0  21   9   -6.22   11.77
   0  22  -9    0.12    5.05
   0 -22   9   -2.62    2.46
   0  22   9    0.00   10.47
   0 -22   9   -2.51    2.63
   0 -22  -9    0.43    7.12
   0  22   9   -3.34    7.73
   0  23   9   -2.46    5.88
   0 -23   9    0.80    2.03
   0  23   9    0.16    9.22
   0  23  -9    0.03    4.16
   0 -23  -9    7.50    5.95
   0  24  -9   -3.25   13.55
   0  24   9    0.54   13.80
   0  24  -9    9.76    5.72
   0 -24  -9   -4.63    8.09
   0 -25  -9    5.43    8.23
   0  25  -9    3.18    5.79
   0  25  -9    3.89    7.67
   0  25   9   -0.97   14.31
   0  26  -9    7.89    7.89
   0  26  -9  -11.59   10.46
   0 -26  -9    8.16    8.12
   0  26   9   -1.01   14.60
   0  27  -9   -0.09    4.33
   0  27   9    1.03   10.64
   0  27  -9   -3.01    4.85
   0 -27  -9    4.75    5.43
   0   0 -10   68.76   13.26
   0   0  10   58.34   29.03
   0   0 -10   74.57   13.75
   0   0 -10   67.05    9.75
   0   1  10    0.03   10.64
   0  -1  10   -0.09   10.17
   0   1 -10    3.29    4.45
   0  -1 -10    4.47    4.54
   0   1 -10   -0.03    4.26
   0   1 -10    4.10    2.89
   0  -1 -10   -0.05    4.43
   0  -1 -10    2.21    2.71
   0   2 -10    0.03    4.96
   0  -2  10   10.25   11.34
   0   2 -10    7.10    3.49
   0   2 -10    7.62    4.96
   0  -2 -10    2.99    2.97
   0   2  10    0.01   12.23
   0  -2 -10    0.01    5.08
   0  -2 -10    7.75    5.29
   0   3 -10   -0.09    4.37
   0   3  10   -0.14   11.13
   0  -3  10    6.20    9.71
   0  -3 -10   -0.01    4.41
   0   3 -10    3.24    3.09
   0   3 -10    3.49    4.39
   0  -3 -10    5.80    4.77
   0   4 -10   22.59    7.52
   0  -4  10   25.79   16.67
   0   4 -10   18.51    7.64
   0   4  10   -0.13   20.57
   0   4 -10   15.55    5.47
   0  -4 -10   23.97    8.55
   0  -4 -10   24.11    7.85
   0   5 -10   10.72    4.89
   0  -5 -10   14.19    7.55
   0   5 -10   14.05    6.31
   0   6 -10   37.45    8.17
   0  -6 -10   37.61   17.38
   0   6 -10   42.74    9.72
   0  -7  10   13.26   11.36
   0   7  10   -0.01   14.89
   0   7 -10    0.18    5.52
   0  -7 -10   12.18    6.00
   0   7 -10    7.56    4.05
   0   7 -10    9.59    5.22
   0  -7 -10   -0.04    5.17
   0  -8 -10    0.01    3.58
   0   8 -10    2.26    2.81
   0   8 -10    0.07    3.63
   0   8 -10    1.97    3.09
   0  -8 -10    0.96    4.22
   0   8  10    0.00   10.12
   0  -8  10    1.71    7.76
   0  -9  10   -0.30    3.88
   0   9 -10    0.41    2.63
   0   9 -10    0.09    3.62
   0   9 -10    1.22    2.54
   0   9  10   -0.04    8.91
   0  -9 -10    0.03    3.09
   0  -9 -10    2.16    3.80
   0  10 -10    3.13    2.92
   0  10 -10    0.07    3.58
   0 -10 -10    0.00    3.54
   0  10 -10    2.38    3.29
   0 -10  10    2.75    4.70
   0 -10 -10    2.51    4.63
   0  10  10   -0.37    4.00
   0  10  10   -0.09   10.50
   0  11 -10    2.05    2.72
   0 -11  10    2.28    4.45
   0  11  10    0.04   10.71
   0  11 -10    2.07    3.28
   0 -11 -10    1.34    4.80
   0 -11 -10    0.00    3.30
   0  11  10   -0.41    4.21
   0 -12  10    0.49    4.35
   0  12 -10    1.09    5.33
   0  12 -10    0.68    2.35
   0  12  10    0.17    4.05
   0 -12 -10   -0.13    2.78
   0  12  10   -0.03    9.16
   0  12 -10    0.00    5.33
   0 -12 -10    2.93    4.26
   0 -13 -10   -0.12    2.91
   0  13 -10    1.32    2.55
   0 -13 -10    1.33    4.09
   0  13 -10    0.58    2.08
   0  13 -10    0.09    3.37
   0 -13  10   -1.24    4.00
   0  13  10   -0.41    4.05
   0  13  10    0.00    8.38
   0  14  10   -0.20    5.10
   0 -14 -10   -0.71    3.13
   0 -14  10    2.99    4.49
   0  14 -10    2.09    2.33
   0  14 -10   -1.76    2.58
   0  14  10    0.01    9.33
   0  14 -10   -0.03    3.64
   0 -14 -10    3.28    4.83
   0  14 -10    3.21    3.00
   0 -15  10    1.07    3.88
   0 -15 -10    0.45    2.47
   0  15  10   -0.25    4.93
   0  15 -10    1.33    2.80
   0  15 -10    1.85    2.01
   0  15 -10    0.07    3.13
   0  15  10   -2.88    8.23
   0  15 -10   -2.28    2.50
   0 -15 -10    1.16    4.38
   0  16 -10    4.06    3.68
   0  16 -10   -1.00    4.04
   0  16 -10    5.42    4.05
   0 -16  10    2.04    5.10
   0  16  10    1.12    7.62
   0 -16 -10    1.87    3.08
   0 -16 -10    2.91    6.06
   0  16  10  -13.05   10.92
   0  17  10   -1.35    7.02
   0  17 -10   -0.14    3.51
   0 -17 -10    1.89    5.43
   0  17 -10    5.38    3.67
   0 -17  10   -0.62    4.31
   0  17  10    6.81    9.90
   0 -17 -10    0.71    2.47
   0  18 -10    7.71    4.13
   0  18  10    0.62    8.27
   0  18  10    3.12    9.65
   0  18 -10   -0.13    3.64
   0  18 -10    4.58    4.08
   0 -18 -10    4.22    5.91
   0 -18  10    0.82    4.66
   0 -18 -10    0.26    2.49
   0  19  10   -4.60    9.59
   0  19  10    0.20    9.06
   0 -19  10   -0.41    3.34
   0  19 -10    2.75    4.51
   0 -19 -10    0.58    2.01
   0  19 -10   10.42    4.34
   0 -19  10    0.26    2.58
   0  19 -10    1.93    3.41
   0 -19 -10   31.48    6.95
   0  20  10    1.34   11.38
   0  20 -10   -2.93    5.31
   0  20 -10   10.94    6.27
   0 -20 -10   22.02    8.60
   0  20  10   -4.79   10.35
   0 -21 -10    7.59    6.37
   0  21 -10   -0.17    4.63
   0  21 -10   -5.50    4.17
   0  21  10   -0.70    9.01
   0  22  10    0.99   10.18
   0  22 -10    7.72    4.87
   0  22 -10   -4.81    5.75
   0   0 -11    6.54    5.37
   0   0 -11   -0.03    6.23
   0   0  11    0.01   14.55
   0  -1 -11    0.01    6.06
   0  -1 -11   -7.67    5.04
   0   1  11   -0.05   13.47
   0   1 -11    0.08    5.80
   0  -1  11  -15.76   14.01
   0   1 -11    0.29    4.81
   0  -2 -11   -0.11    5.41
   0  -2  11   -2.39   11.84
   0   2 -11    1.66    4.20
   0   2 -11    0.00    5.18
   0  -2 -11   -7.62    4.72
   0   2  11    0.16   12.17
   0   3 -11    0.16    6.45
   0  -3  11   -0.93   26.57
   0   3 -11    4.25    2.75
   0  -3 -11   -0.05    6.70
   0   3 -11    7.59    5.16
   0   3  11    0.00   15.43
   0  -4  11    0.11    6.00
   0   4 -11   -0.07    4.60
   0   4 -11   -0.18    2.00
   0  -4 -11   -4.22    4.18
   0   4 -11   -0.42    5.87
   0   4  11   -0.08   11.63
   0   5 -11    1.59    4.74
   0  -5 -11    6.39    5.62
   0   5 -11   -1.34    4.17
   0   5  11    9.92   15.10
   0  -5  11    9.68    6.87
   0   6  11  -12.15   14.38
   0  -6 -11    7.33    5.42
   0  -6  11   16.35    6.46
   0   6 -11   -3.64    4.60
   0   6 -11   -0.20    3.76
   0  -7 -11    7.37    4.49
   0  -7  11   -1.32    5.70
   0   7 -11    0.97    4.41
   0  -7 -11   -5.43    4.76
   0   7 -11    1.25    3.03
   0   7  11    4.56   11.81
   0   8 -11    0.67    1.47
   0   8 -11   -5.85    4.88
   0  -8 -11    4.91    2.62
   0   8  11   -4.03    7.47
   0  -8 -11   -3.41    2.87
   0   8 -11    1.60    1.80
   0  -8  11   -9.94    3.56
   0  -9 -11    4.09    4.72
   0   9 -11    1.38    3.10
   0   9  11   -0.16   13.76
   0  -9  11    2.91    6.63
   0  -9 -11   10.40    5.58
   0   9 -11   -4.68    5.45
   0  10 -11    1.30    4.83
   0  10  11    5.60   20.47
   0 -10 -11   16.07    6.77
   0  10 -11    8.56    7.91
   0 -10 -11   46.21    8.42
   0 -10  11   -1.49    9.63
   0  11 -11    2.49    3.17
   0  11 -11   -1.64    4.91
   0 -11 -11   -1.74    4.09
   0 -11 -11   11.63    5.49
   0 -11  11    0.80    6.02
   0  11  11    3.71   12.21
   0  12  11   -6.66   17.18
   0  12 -11    2.93    4.72
   0 -12  11   31.48    9.22
   0 -12 -11   35.17    8.14
   0  12 -11    0.87    6.87
   0 -12 -11    0.87    6.05
   0  13  11   28.28   19.74
   0 -13 -11   48.00    9.43
   0 -13  11   12.40    9.97
   0  13 -11   -0.76    5.42
   0  13 -11   23.91    8.16
   0 -13 -11    3.71    6.47
   0 -14  11    3.99    3.95
   0 -14 -11  -11.34    4.46
   0  14 -11    0.67    3.13
   0  14  11    0.70    8.71
   0 -14 -11    0.70    2.59
   0  14 -11   -0.54    2.55
   0 -15 -11   -0.79    6.97
   0  15 -11    6.47    4.63
   0  15  11   -4.89   12.54
   0 -16 -11    1.37    5.76
  -1   0   0    0.46    1.76
   1   0   0    0.74    2.57
  -1   0   0    3.31    0.89
  -1   0   0    1.38    3.17
  -1   0   0    0.63    1.34
  -1   0   0    1.64    2.74
   1   0   0    3.14    3.00
  -1   1   0  867.24   69.12
  -1   1   0 1096.50   98.12
  -1  -1   0  994.37   88.43
   1  -1   0 1036.98   91.63
   1   1   0 1128.16  102.30
  -1  -1   0 1010.56   81.33
  -1  -1   0 1011.60   88.70
  -1   1   0 1048.78   88.92
  -1  -1   0  894.94   67.19
   1  -1   0  947.37   86.11
  -1   1   0 1066.57   95.10
  -1  -1   0 1015.98   80.16
  -1   1   0 1027.12   79.50
   1   1   0 1088.34   95.27
  -1  -1   0 1015.34   83.11
  -1  -1   0  993.32   88.33
  -1   2   0 4076.85  560.04
  -1  -2   0 4625.72  652.29
  -1  -2   0 4558.01  639.16
  -1  -2   0 4556.39  630.44
  -1  -2   0 4856.46  682.47
   1  -2   0 4460.43  617.02
   1   2   0 5169.42  722.73
   1   2   0 5225.57  736.42
  -1   2   0 4705.42  664.04
   1  -2   0 5343.96  764.12
  -1   2   0 4451.66  625.68
  -1   2   0 5415.46  727.90
  -1   2   0 4694.70  666.31
  -1  -2   0 4780.40  646.12
  -1  -2   0 4694.65  654.89
   1  -2   0 5068.95  709.65
  -1   2   0 4619.27  646.41
  -1  -2   0 4585.18  621.73
   1   2   0 5427.43  768.45
   1   2   0 4946.27  692.12
  -1   2   0 4313.27  598.83
   1   2   0 4820.55  675.26
  -1   3   0 3665.82  484.03
   1  -3   0 4613.37  614.17
   1   3   0 3987.89  539.93
  -1  -3   0 3995.53  530.14
  -1  -3   0 4292.50  570.41
   1   3   0 4595.33  612.21
   1  -3   0 3989.51  528.62
  -1   3   0 4121.27  549.18
  -1   3   0 4237.24  578.01
  -1  -3   0 3992.65  516.90
   1   3   0 4168.22  561.76
  -1   3   0 3747.84  507.73
  -1  -3   0 4205.79  565.68
  -1   3   0 4175.39  559.12
  -1   3   0 3973.11  534.39
  -1  -3   0 4146.01  524.12
  -1  -3   0 4317.62  576.25
   1   3   0 4478.26  602.96
   1  -3   0 4400.16  617.67
  -1   3   0 4012.05  541.57
  -1  -3   0 4385.34  586.84
   1  -4   0 8962.46 1587.68
  -1  -4   0 8253.64 1448.98
  -1   4   0 8550.96 1511.74
   1   4   0 8740.14 1554.68
  -1   4   0 7639.67 1358.91
   1  -4   0 8665.77 1520.19
  -1  -4   0 7984.03 1405.42
  -1   4   0 9089.23 1601.86
   1   4   0 8695.30 1540.13
   1   4   0 9273.48 1639.24
  -1   4   0 8615.21 1523.50
  -1   4   0 7624.35 1339.12
  -1  -4   0 9124.79 1556.19
  -1   4   0 9734.67 1726.69
  -1   4   0 8459.27 1500.14
  -1  -4   0 9999.00 1757.08
  -1  -4   0 8699.26 1501.81
   1   4   0 9153.28 1606.67
  -1  -4   0 8390.67 1469.35
   1  -4   0 8193.53 1438.87
  -1  -4   0 9080.15 1603.15
  -1  -5   0 3664.71  460.23
  -1  -5   0 3863.20  509.27
   1  -5   0 3979.31  524.37
   1   5   0 3958.62  529.01
  -1   5   0 3795.83  511.10
  -1  -5   0 3912.07  514.90
  -1   5   0 3972.91  537.64
  -1  -5   0 3708.70  490.01
  -1   5   0 3859.89  518.00
   1  -5   0 4054.62  544.24
   1   5   0 4181.19  558.09
  -1  -5   0 3900.88  510.54
  -1  -5   0 4072.06  521.16
  -1   5   0 3669.16  496.68
   1   5   0 4118.81  553.71
   1   5   0 4057.04  534.43
  -1   5   0 3470.30  459.55
  -1   5   0 4111.73  545.11
  -1   5   0 3846.56  514.23
   1  -5   0 3801.06  501.41
  -1  -6   0 1761.73  178.62
   1   6   0 1730.85  175.50
   1  -6   0 1794.54  177.95
   1   6   0 1615.58  168.70
  -1   6   0 1785.11  186.14
  -1   6   0 1732.87  208.99
  -1  -6   0 1585.80  149.06
   1  -6   0 1715.64  174.64
   1   6   0 1751.20  186.05
  -1   6   0 1641.64  177.92
   1  -6   0 1529.67  162.87
  -1   6   0 1657.08  173.84
  -1   6   0 1629.19  173.75
  -1  -6   0 1732.74  173.13
   1   6   0 1755.85  184.14
  -1  -6   0 1682.78  170.72
  -1  -6   0 1637.22  167.67
   1  -6   0 1397.76  142.76
   1  -6   0 1649.25  169.26
   1   6   0 1568.28  157.19
  -1  -6   0 1505.30  145.29
  -1   6   0 1663.79  180.43
  -1   7   0 5020.76  750.44
   1  -7   0 5651.84  810.56
  -1  -7   0 5494.34  789.29
   1   7   0 4977.58  741.16
   1  -7   0 4904.22  724.36
   1   7   0 4780.91  703.20
  -1  -7   0 5697.38  798.29
   1   7   0 5271.33  766.51
   1   7   0 4626.71  670.10
  -1  -7   0 5668.38  818.58
  -1   7   0 4805.96  719.70
  -1   7   0 4551.02  686.81
  -1  -7   0 5181.12  729.08
  -1  -7   0 4860.68  691.37
  -1  -7   0 4806.47  701.34
   1   7   0 5368.96  789.22
   1  -7   0 5329.14  770.10
   1  -7   0 4980.04  725.32
  -1   7   0 4960.06  728.12
  -1   7   0 4728.01  701.56
  -1   7   0 5217.26  767.81
  -1  -7   0 5376.38  776.49
   1  -7   0 4785.29  698.01
   1   8   0  474.55   38.55
  -1   8   0  439.49   43.20
  -1  -8   0  459.72   35.33
   1  -8   0  496.75   44.24
   1   8   0  426.36   33.48
  -1   8   0  479.17   43.16
  -1  -8   0  426.17   43.91
  -1   8   0  386.36   40.17
   1   8   0  411.02   48.80
  -1   8   0  449.27   39.86
   1  -8   0  483.43   40.37
   1  -8   0  520.15   40.95
  -1  -8   0  465.37   38.40
   1   8   0  445.43   42.78
  -1   8   0  474.12   46.67
   1  -8   0  477.90   39.78
  -1   8   0  354.79   28.60
  -1   8   0  434.42   40.70
   1  -8   0  451.77   46.74
  -1  -8   0  469.86   34.11
  -1  -8   0  468.25   32.50
  -1  -8   0  496.56   34.33
   1   8   0  442.33   38.01
  -1  -8   0  517.92   40.04
   1   9   0  232.15   18.80
  -1  -9   0  269.06   18.76
  -1  -9   0  298.82   22.18
   1  -9   0  361.43   27.20
  -1   9   0  240.89   21.64
  -1  -9   0  293.78   18.94
  -1   9   0  234.73   23.66
  -1   9   0  259.46   27.16
   1   9   0  188.84   14.29
   1   9   0  243.86   25.68
  -1  -9   0  249.82   19.88
  -1  -9   0  268.60   17.74
   1  -9   0  250.53   19.99
  -1   9   0  236.01   25.06
   1   9   0  239.66   25.08
  -1   9   0  216.92   16.56
   1  -9   0  282.66   22.66
  -1  -9   0  262.66   19.85
   1   9   0  238.17   21.05
   1  -9   0  308.14   23.83
  -1  -9   0  259.05   21.59
   1  -9   0  286.05   26.24
  -1   9   0  207.50   23.44
   1   9   0  223.08   20.95
   1  -9   0  267.99   22.20
  -1   9   0  275.90   25.19
  -1  10   0  441.30   46.31
  -1  10   0  487.83   44.18
  -1 -10   0  585.74   42.47
  -1 -10   0  542.88   42.30
   1  10   0  491.77   46.53
   1  10   0  473.08   38.42
   1 -10   0  570.78   45.62
  -1  10   0  571.88   49.58
   1  10   0  399.25   30.70
  -1 -10   0  572.41   40.80
   1 -10   0  549.78   42.21
   1  10   0  509.28   42.36
  -1  10   0  549.90   50.85
   1 -10   0  546.66   44.47
  -1  10   0  496.46   46.34
  -1  10   0  485.46   34.04
   1 -10   0  643.91   53.31
  -1 -10   0  578.35   43.29
  -1 -10   0  555.42   44.66
  -1 -10   0  564.82   40.11
   1 -10   0  614.78   47.74
  -1 -10   0  568.38   50.48
   1  10   0  462.27   40.78
   1  10   0  439.09   33.63
  -1  10   0  424.31   58.22
  -1  10   0  495.30   36.73
   1 -10   0  587.67   48.38
   1 -11   0 1289.80  114.26
  -1  11   0 1223.18  118.06
   1  11   0  995.63  100.02
  -1 -11   0 1180.16  100.71
   1 -11   0 1209.11  109.09
   1 -11   0 1047.53   95.60
   1  11   0  938.22   82.45
  -1 -11   0 1164.33  103.32
  -1  11   0  982.13   96.05
   1 -11   0 1122.58  103.26
  -1  11   0 1176.00  111.61
  -1 -11   0 1162.14   99.30
  -1  11   0 1054.60   93.59
   1  11   0 1084.36  100.29
   1  11   0 1050.05   95.71
   1  11   0  832.32   74.08
   1 -11   0 1203.93  111.69
  -1 -11   0 1230.87  105.88
  -1 -11   0 1178.55  107.23
   1 -11   0 1131.45   99.93
  -1  11   0 1044.25   90.06
  -1  11   0  948.65   98.46
  -1  11   0 1133.45  138.68
  -1 -11   0 1198.64  104.24
  -1  11   0 1043.94   89.47
  -1 -11   0 1183.75  103.73
   1  11   0 1017.80   96.69
  -1  11   0 1078.94  105.90
   1  12   0    2.09    1.59
  -1  12   0    2.96    3.51
  -1  12   0    3.05    1.51
  -1 -12   0    2.13    0.25
  -1  12   0    2.32    3.78
   1 -12   0    3.66    2.57
  -1  12   0    1.21    2.18
   1 -12   0    3.35    3.17
   1  12   0    2.49    2.28
   1  12   0    3.03    2.25
  -1 -12   0    3.95    2.64
  -1  12   0    3.01    3.08
  -1 -12   0    3.63    1.75
   1 -12   0    2.46    4.70
   1 -12   0    2.55    2.16
   1 -12   0    3.76    2.68
   1  12   0    7.16    2.84
   1  12   0    8.77    1.51
  -1 -12   0    3.06    2.07
   1  12   0    3.06    3.25
  -1 -12   0    3.42    2.17
  -1  12   0    1.28    1.99
  -1  12   0    1.82    2.14
  -1 -12   0    3.54    2.41
  -1 -12   0    3.12    1.82
  -1  12   0    0.93    4.34
  -1  12   0    2.81    2.76
  -1 -12   0    2.67    1.93
   1 -12   0    2.71    2.76
   1  13   0    2.85    1.54
  -1 -13   0    3.49    1.84
   1  13   0    2.10    1.49
   1 -13   0    9.44    2.74
   1  13   0    3.14    2.85
  -1 -13   0    2.47    0.32
  -1 -13   0    2.42    2.00
   1 -13   0    2.80    2.12
  -1 -13   0    3.62    1.85
  -1  13   0    2.43    3.03
   1  13   0    6.67    2.28
  -1 -13   0    3.26    2.67
  -1  13   0    2.51    3.85
  -1  13   0    6.05    3.51
  -1  13   0    1.79    2.10
   1  13   0    3.12    2.21
  -1 -13   0    2.83    2.05
  -1  13   0    2.12    1.55
   1 -13   0    2.60    2.30
   1 -13   0    3.59    2.89
   1  13   0    0.80    3.22
  -1 -13   0    3.46    2.51
   1 -13   0    4.08    3.33
   1  13   0    7.41    2.10
  -1  13   0    1.33    4.30
  -1  13   0    2.99    1.12
   1 -13   0    4.08    2.84
  -1  13   0    1.38    2.01
  -1  13   0    4.30    2.72
   1  14   0    3.00    2.92
   1  14   0    2.20    1.59
  -1 -14   0    4.56    2.64
  -1  14   0    3.51    1.63
  -1  14   0    3.97    1.09
   1 -14   0    3.83    2.84
   1 -14   0    5.27    3.01
  -1  14   0    3.53    2.74
  -1  14   0    2.67    4.30
   1  14   0    3.46    2.34
   1  14   0    2.62    2.22
  -1  14   0    2.71    3.16
  -1  14   0    2.93    3.66
   1 -14   0    4.71    2.87
   1 -14   0    3.30    2.38
  -1  14   0    2.64    2.12
  -1 -14   0    3.66    2.13
   1  14   0    3.28    1.55
   1  14   0    4.93    2.25
   1 -14   0    3.92    3.46
  -1 -14   0    3.91    2.76
  -1 -14   0    4.75    2.00
   1 -14   0    2.92    2.16
  -1  14   0    3.31    6.93
  -1 -14   0    3.04    0.38
  -1 -14   0    5.01    1.99
  -1 -14   0    4.18    2.12
  -1  14   0    2.29    3.71
   1  14   0    3.30    3.31
  -1 -15   0  243.10   18.97
   1  15   0  206.78   16.36
   1  15   0  196.51   15.81
   1 -15   0  218.39   19.76
  -1  15   0  187.02   15.57
  -1  15   0  191.93   11.67
  -1  15   0  174.59   20.10
  -1 -15   0  264.91   17.93
  -1  15   0  198.68   21.28
   1  15   0  163.36   18.63
   1 -15   0  261.57   20.89
   1 -15   0  224.02   16.86
  -1  15   0  198.87   14.94
   1 -15   0  266.42   20.47
  -1  15   0  168.58   17.18
  -1  15   0  196.34   23.68
   1 -15   0  257.54   17.97
  -1  15   0  190.71   19.77
   1 -15   0  251.37   32.32
  -1 -15   0  249.06   19.60
  -1 -15   0  230.06   16.44
  -1 -15   0  182.96    8.73
   1  15   0  186.09   15.69
   1  15   0  180.42   12.47
  -1 -15   0  255.16   17.57
   1  15   0  184.27   18.40
  -1  15   0  221.18   34.59
  -1 -15   0  254.15   17.93
  -1 -16   0    3.71    2.46
  -1 -16   0    0.57    3.76
  -1 -16   0    1.26    1.76
   1 -16   0    2.16    2.72
  -1  16   0    2.00    3.47
   1 -16   0    2.70    2.67
   1 -16   0    2.07    1.97
   1  16   0    0.84    1.41
  -1  16   0    1.09    3.68
  -1 -16   0    4.31    1.82
   1  16   0    1.32    1.71
  -1  16   0    1.60    3.56
   1  16   0    1.38    1.28
  -1  16   0    1.58    2.84
  -1  16   0    1.84    1.58
  -1  16   0    1.12    2.32
   1 -16   0    2.33    2.67
   1  16   0    1.97    2.17
  -1 -16   0    1.71    1.95
  -1 -16   0    1.64    1.78
   1  16   0    1.34    2.04
   1 -16   0    2.51    3.28
  -1 -16   0    1.35    0.30
   1  16   0    0.58    2.70
   1  16   0    1.25    2.63
  -1  16   0    1.29    1.88
   1 -16   0    1.67    1.92
  -1  16   0    1.05    3.39
  -1  16   0    1.79    0.87
  -1  17   0 1512.02  148.46
  -1 -17   0 1793.64  171.65
   1  17   0  978.19   98.33
   1 -17   0 1839.58  181.39
   1 -17   0 1804.27  177.14
  -1  17   0 1405.55  158.07
   1 -17   0 1660.45  158.65
   1  17   0 1308.26  123.82
   1 -17   0 1736.32  165.20
  -1  17   0 1458.39  157.81
  -1  17   0 1346.95  142.84
  -1  17   0 1194.35  124.38
   1  17   0 1307.96  138.50
   1 -17   0 1590.49  161.00
  -1  17   0 1155.56  116.75
  -1 -17   0 1719.19  163.21
   1  17   0 1227.45  124.99
  -1 -17   0 1617.00  157.53
  -1 -17   0 1670.31  159.91
  -1 -17   0 1869.54  175.09
   1  17   0 1388.82  139.02
   1  17   0 1106.60  120.17
   1  17   0 1353.88  133.93
  -1  17   0 1287.09  128.29
  -1  17   0 1636.86  175.26
   1 -17   0 1971.18  198.64
  -1  17   0 1382.78  126.26
  -1  18   0   12.67    1.59
   1  18   0   10.83    2.25
   1  18   0   11.56    4.87
   1 -18   0   16.13    3.29
  -1  18   0   15.97    6.29
   1  18   0   11.06    3.97
   1  18   0    8.14    2.57
  -1  18   0    7.35   10.19
  -1  18   0   10.64    3.41
  -1  18   0   12.17    5.00
  -1  18   0   13.27    3.45
  -1 -18   0   15.98    3.16
   1 -18   0   18.23    6.05
   1 -18   0   17.52    5.08
  -1  18   0    9.30    3.71
  -1 -18   0   15.64    3.18
  -1 -18   0   15.89    3.45
   1  18   0    6.35    7.60
  -1 -18   0   19.48    6.75
  -1 -18   0   22.94    4.09
   1  18   0   11.59    3.56
   1 -18   0   16.00    3.56
   1  18   0   12.01    2.87
   1 -18   0   14.19    4.83
   1 -19   0  327.45   27.20
  -1  19   0  249.31   20.11
  -1  19   0  193.63   30.70
   1 -19   0  284.15   20.82
  -1  19   0  243.26   14.86
   1 -19   0  343.71   30.79
   1 -19   0  305.32   22.02
  -1 -19   0  279.53   21.07
  -1 -19   0  372.48   26.70
   1 -19   0  267.93   24.55
  -1  19   0  245.26   27.11
   1  19   0  208.29   22.44
   1  19   0  227.12   17.51
  -1 -19   0  343.50   24.40
   1  19   0  182.94   17.24
   1  19   0  191.14   22.39
  -1  19   0  216.04   23.49
  -1 -19   0  289.91   22.72
   1  19   0  208.90   19.11
   1  19   0  276.23   32.37
  -1 -19   0  305.03   22.72
  -1  19   0  183.14   17.89
   1  19   0  204.91   14.39
  -1 -20   0   16.69    3.62
   1 -20   0   16.32    5.16
   1 -20   0   19.22    6.38
   1 -20   0   19.52    5.39
  -1  20   0   13.25    1.51
   1  20   0   15.80    5.46
  -1  20   0   12.92    3.42
   1 -20   0   15.52    3.13
   1 -20   0   17.01    3.29
  -1  20   0   13.40    5.18
  -1  20   0    4.14    4.13
   1  20   0   11.34    2.13
   1  20   0   12.60    4.24
   1  20   0   13.13    2.68
  -1 -20   0   21.23    4.10
  -1 -20   0   20.80    3.71
  -1 -20   0   15.27    3.37
   1  20   0   20.18    7.55
   1  20   0   11.90    5.20
  -1 -20   0   18.57    3.83
   1  20   0   10.65    3.25
  -1  20   0   15.18    3.37
  -1  20   0   20.07    6.84
  -1 -21   0  178.05   13.96
   1  21   0  160.40   22.41
  -1 -21   0  138.81   11.97
   1  21   0  107.23    7.98
   1  21   0  134.04   20.35
   1  21   0  100.54   10.63
  -1 -21   0  173.00   13.59
   1 -21   0  183.50   20.32
   1 -21   0  144.19   11.59
   1 -21   0  171.79   17.09
  -1  21   0  112.94   15.61
   1 -21   0  150.27   11.69
   1 -21   0  141.15   15.42
  -1  21   0  126.51   18.99
  -1  21   0  133.47   20.30
   1  21   0  111.58    9.17
  -1 -21   0  156.11   13.42
  -1 -21   0  160.46   13.59
   1  21   0  106.01   14.96
   1  21   0  118.77   15.97
   1  21   0  144.42   13.01
  -1  21   0  124.75   11.22
  -1  21   0  108.65   10.65
  -1  21   0  123.70   13.13
   1  22   0   10.43    3.37
   1  22   0   19.07    8.04
  -1  22   0   13.06    7.23
  -1  22   0   16.05    7.62
  -1  22   0   14.11    4.12
  -1  22   0   11.17    3.62
  -1 -22   0   14.34    3.50
  -1  22   0   11.69    3.18
  -1  22   0   12.48    5.54
   1 -22   0   13.35    5.26
   1 -22   0   13.98    3.04
   1 -22   0   19.43    5.95
   1 -22   0   15.11    3.22
  -1 -22   0   27.93    4.03
   1  22   0   12.65    2.59
   1  22   0   10.56   10.87
   1  22   0   16.00    6.93
   1 -22   0   -0.71    3.67
  -1 -22   0   18.39    3.83
  -1 -22   0   17.94    4.01
  -1 -22   0   14.80    3.84
   1  22   0   14.85    5.79
   1  22   0   11.22    3.95
   1 -22   0   22.36    7.31
   1  23   0   66.06    6.26
  -1 -23   0   90.75    9.31
  -1  23   0   76.19   15.40
   1  23   0   75.64   14.43
  -1 -23   0   80.84    8.66
   1 -23   0   85.91    7.92
   1 -23   0   82.57   11.39
   1 -23   0   68.93    8.89
   1 -23   0   83.92   11.06
   1  23   0   69.06   16.39
   1  23   0   67.89   12.18
  -1 -23   0  101.00    9.37
  -1 -23   0   93.89    9.76
   1  23   0   56.40    7.71
  -1  23   0   76.49    8.00
  -1  23   0   69.07   15.17
  -1  23   0   63.80   11.60
  -1 -23   0   99.51    9.75
   1  24   0    0.00    0.91
  -1  24   0   -1.08    2.25
   1 -24   0   -0.14    1.17
   1  24   0    0.88    1.30
  -1 -24   0   -0.66    1.35
  -1  24   0   -2.88    3.00
   1 -24   0   -0.33    3.96
  -1  24   0   -0.12    1.18
   1 -24   0   -0.46    1.35
  -1 -24   0   -1.63    1.37
  -1 -24   0    0.22    1.49
  -1 -24   0    0.89    1.34
   1  24   0   -1.28    2.88
   1  24   0   -0.36    2.41
   1 -24   0    0.20    1.09
  -1  24   0    0.24    3.26
  -1 -24   0    0.03    1.50
  -1  25   0   73.18   16.23
  -1 -25   0   76.60    8.73
   1  25   0   65.03   12.52
   1 -25   0   68.93    9.08
  -1  25   0   65.23    7.10
   1  25   0   52.77    7.39
   1 -25   0   85.84   12.39
   1 -25   0   87.80    7.73
   1  25   0   69.32   14.44
  -1 -25   0   77.42    8.55
  -1  25   0   58.43   11.75
   1  26   0   36.11   10.80
   1 -26   0   31.66    5.74
   1  26   0   33.78    9.19
  -1  26   0   36.90   12.01
   1 -26   0   40.42    8.66
  -1 -26   0   39.00    5.26
  -1 -26   0   37.59    5.63
   1  26   0   24.72    5.21
  -1  26   0   29.04    8.46
  -1  27   0    0.92    1.96
  -1  27   0    1.41    2.87
   1  27   0    1.24    2.21
  -1 -27   0    0.70    1.24
  -1 -27   0   -2.46    1.07
   1  27   0    0.88    1.05
   1  27   0    0.09    2.58
   1 -27   0    0.76    1.91
  -1 -28   0   24.26    4.93
   1  28   0   14.75    4.37
  -1  28   0   20.15    7.37
   1  28   0   22.30    8.42
  -1  28   0   26.73   10.80
   1  28   0   25.56    9.90
   1 -28   0   30.07    7.56
  -1 -28   0   24.49    4.28
  -1  28   0   21.82    9.97
   1  29   0    5.72    5.34
   1  29   0    2.28    4.62
  -1  29   0    4.25    4.00
  -1  29   0    3.01    5.34
  -1  29   0    6.80    5.92
   1 -29   0    6.77    4.03
  -1 -29   0    3.67    2.46
   1  29   0    1.89    2.55
  -1 -29   0   -5.29    4.08
   1 -30   0   76.81   11.40
  -1  30   0   58.88   13.73
  -1  30   0   67.58   14.64
  -1 -30   0   29.10    7.34
  -1 -30   0   59.77   10.90
   1  30   0   50.34   11.88
   1  30   0   44.30    7.13
   1  30   0   57.44   13.34
   1 -31   0   11.10    5.09
  -1  31   0    8.42    6.16
  -1  31   0   11.47   11.12
   1  31   0    7.73    5.42
   1  31   0    3.67   10.15
   1  31   0    5.54    3.08
  -1 -31   0    8.83    3.35
   1 -32   0    5.33    4.03
   1  32   0    3.67    4.99
  -1  32   0    2.63    4.64
   1  32   0    3.01    4.39
  -1 -32   0    3.10    2.59
  -1  32   0    2.62    5.06
   1 -33   0   -0.13    2.71
  -1  33   0   -0.11    3.78
  -1  33   0    1.28    3.10
   1  33   0   -0.33    3.42
   1 -33   0    1.07    2.92
   1  33   0    0.11    3.74
   1 -34   0    4.37    4.60
   1 -34   0    0.03    4.18
  -1 -34   0    3.29    3.13
  -1  34   0   -0.03    5.71
  -1  34   0    5.37    4.87
   1  34   0    0.12    5.74
   1  34   0    4.67    5.26
  -1 -35   0    0.64    2.07
  -1  35   0    0.57    3.79
   1 -35   0    0.00    3.29
  -1  35   0    0.07    4.41
   1  35   0    0.08    4.41
   1  35   0    1.64    3.99
   1 -35   0    0.37    3.64
   1  36   0    7.60    6.35
  -1  36   0    7.29    5.92
   1 -36   0    0.25    5.09
   1 -36   0    7.45    5.68
  -1  36   0    0.00    6.77
   1  36   0   -0.04    6.91
   1  37   0    1.07    5.39
  -1  37   0    1.49    5.01
   1 -37   0    1.25    4.33
  -1  37   0    0.00    5.70
   1  37   0    0.09    5.97
   1 -37   0   -0.18    4.24
  -1  38   0    1.03    4.76
  -1  38   0   -0.24    5.45
   1  38   0    0.03    5.58
   1 -38   0   -0.47    4.03
   1  38   0    1.76    4.99
   1 -38   0    0.21    3.92
   1 -39   0    3.92    6.39
   1  39   0    1.91    7.66
   1 -39   0    1.34    6.52
  -1  39   0    2.66    9.02
   1  39   0    5.20    8.67
  -1  39   0    5.63    7.31
  -1  40   0    5.87   10.98
   1  40   0   -4.67    9.94
   1 -40   0    0.96    7.43
   1 -40   0   16.88    7.80
   1 -41   0   -2.87    6.31
   1  41   0    0.45    8.21
  -1  41   0   -4.68    9.00
  -1   0  -1 1696.07  169.17
  -1   0   1 1679.35  183.42
  -1   0  -1 1899.98  193.35
  -1   0  -1 1849.34  175.96
   1   0  -1 1832.45  186.34
  -1   0  -1 1961.38  180.91
  -1   0  -1 1826.40  186.83
  -1   0  -1 1838.68  184.16
  -1   0   1 1848.82  174.16
   1   0  -1 1917.76  201.44
   1   0  -1 1953.50  224.56
  -1   0   1 1790.22  188.06
  -1   0   1 1831.55  195.82
   1   0  -1 1719.92  183.14
  -1   0  -1 2007.88  197.74
  -1   0   1 2012.28  215.34
   1   1  -1 1089.47  110.09
  -1   1   1 1129.25  111.60
  -1   1   1  948.85   86.82
  -1   1   1  988.89   89.84
  -1  -1  -1 1025.38   95.47
  -1  -1  -1  863.58   70.74
  -1  -1  -1  920.37   80.03
  -1  -1  -1  974.10   83.04
  -1   1   1  939.91   73.61
   1  -1   1  968.34   82.65
  -1   1   1  830.76   75.75
   1   1  -1  955.99  104.42
   1   1  -1  934.23   84.83
  -1  -1  -1  938.27   80.28
  -1  -1  -1  861.79   67.18
  -1   1   1  935.95   87.84
  -1   1   1 1167.21   97.88
  -1  -1   1 1174.12  110.30
  -1   1  -1  973.76   86.13
   1  -1  -1  985.24  106.64
  -1  -1   1  962.59   81.76
   1  -1  -1  941.49   82.71
  -1   1  -1  896.97   74.77
  -1   1  -1  981.80   79.61
  -1   1  -1 1015.04   88.22
  -1   1  -1  984.20   74.78
  -1   1  -1  860.65   73.79
  -1  -1   1  974.61   88.35
  -1  -1   1  975.19   92.70
   1  -1  -1  940.09   87.13
   1  -1  -1  965.08   83.88
  -1  -1   1  963.00   90.83
   1  -1  -1 1185.27   99.88
  -1   1  -1  947.70   73.75
   1  -1  -1 1022.81   92.06
  -1  -1   1  960.26   71.47
  -1   2   1  490.15   43.41
  -1   2   1  535.30   56.82
   1   2  -1  537.60   47.03
  -1   2   1  571.79   48.56
   1  -2   1  520.79   41.86
  -1  -2  -1  544.66   41.24
  -1  -2  -1  450.85   31.79
  -1  -2  -1  520.49   41.83
   1  -2   1  401.91   33.42
   1   2  -1  596.94   57.34
  -1  -2  -1  532.44   42.07
  -1  -2  -1  561.84   42.26
  -1   2   1  794.47   56.85
  -1   2   1  483.88   38.48
   1   2  -1  575.67   43.55
  -1  -2  -1  491.93   33.71
  -1   2   1  649.05   60.27
  -1   2   1  489.30   42.95
  -1  -2  -1  534.38   40.82
  -1   2   1  497.39   35.31
   1   2  -1  482.71   41.59
   1   2  -1  500.81   55.35
  -1  -2   1  573.00   50.83
   1  -2  -1  490.59   43.79
   1  -2  -1  543.98   72.79
  -1   2  -1  483.09   41.22
  -1   2  -1  506.58   35.62
  -1   2  -1  485.59   40.79
  -1   2  -1  445.79   36.32
  -1   2  -1  533.58   39.01
   1   2   1  586.55   46.60
   1   2   1  476.63   36.05
   1  -2  -1  512.25   42.41
  -1  -2   1  499.53   37.55
  -1  -2   1  437.84   26.73
  -1  -2   1  607.49   51.37
   1  -2  -1  866.23   61.02
  -1   2  -1  545.80   36.62
   1  -2  -1  503.47   42.40
   1  -2  -1  561.03   46.09
  -1  -2   1  539.85   48.93
  -1  -2   1  515.63   44.84
  -1   2  -1  559.11   45.54
  -1  -2   1  407.64   37.40
   1  -3   1 4872.40  668.72
   1   3  -1 4659.04  637.57
  -1  -3  -1 4584.17  629.03
  -1   3   1 4605.01  665.23
  -1   3   1 4299.57  601.35
  -1  -3  -1 5016.37  686.87
   1  -3   1 4730.55  656.05
   1  -3   1 3587.22  497.01
  -1   3   1 4362.09  645.19
   1   3  -1 4818.57  686.64
  -1  -3  -1 5211.86  694.23
  -1   3   1 4582.76  635.56
   1   3  -1 3965.00  594.62
  -1  -3  -1 4901.02  666.40
  -1   3   1 4366.67  607.54
   1   3  -1 4223.31  626.59
  -1  -3  -1 4335.36  575.25
   1   3  -1 4296.01  597.66
  -1  -3  -1 4495.49  611.01
  -1  -3  -1 4798.84  653.26
  -1   3   1 4595.60  621.15
  -1   3   1 3945.47  534.93
   1   3  -1 4584.01  644.78
  -1  -3   1 4394.08  613.41
  -1   3  -1 4627.43  624.33
  -1  -3   1 4522.49  610.59
   1   3   1 4789.61  656.99
  -1   3  -1 4338.51  626.35
  -1   3  -1 4760.34  637.11
  -1   3  -1 4707.19  631.98
   1   3   1 5139.12  710.80
  -1   3  -1 4257.28  592.99
  -1   3  -1 4122.36  571.81
   1  -3  -1 4623.76  640.18
   1  -3  -1 4403.27  633.93
   1  -3  -1 4582.67  708.72
   1  -3  -1 4371.99  607.16
   1  -3  -1 4500.56  625.69
  -1  -3   1 4232.26  551.95
  -1   3  -1 4303.76  616.84
   1  -3  -1 4398.88  616.92
   1  -3  -1 4357.19  609.90
   1  -3  -1 4491.28  621.98
  -1  -3   1 5257.22  734.06
  -1  -3   1 3767.15  533.69
  -1  -3   1 4314.63  609.70
  -1   3  -1 4904.89  659.85
   1  -4   1 6157.26  942.83
  -1  -4  -1 5672.19  841.08
   1  -4   1 4962.96  756.65
  -1  -4  -1 6809.49 1028.51
   1  -4   1 6164.06  935.42
  -1   4   1 5918.14  906.88
  -1  -4  -1 5750.33  853.77
  -1  -4  -1 6219.65  965.67
  -1  -4  -1 5841.73  878.96
  -1   4   1 5975.19  896.98
  -1  -4  -1 5728.43  823.94
   1   4  -1 4987.06  786.49
   1   4  -1 5773.79  888.43
  -1   4   1 6100.06  964.25
  -1   4   1 6565.90  969.80
  -1   4   1 5876.95  901.85
  -1   4   1 5394.09  877.84
  -1  -4  -1 6252.76  942.15
   1  -4   1 4472.35  699.89
  -1  -4  -1 5952.65  890.36
   1   4  -1 5456.62  886.17
   1   4  -1 6333.43  986.76
   1   4  -1 5900.72  912.59
   1   4  -1 6424.34  994.46
   1   4  -1 5397.15  837.22
   1  -4  -1 6048.66  918.18
   1  -4  -1 6236.75  979.42
  -1  -4   1 5549.31  849.43
   1  -4  -1 5928.56  990.91
   1  -4  -1 6008.82  921.34
  -1   4  -1 5807.85  860.89
   1   4   1 5758.03  906.85
  -1   4  -1 5423.80  830.43
  -1   4  -1 6542.61  976.14
   1  -4  -1 6001.01  923.79
  -1   4  -1 5414.46  830.04
  -1   4  -1 5440.68  818.28
   1   4   1 6036.94  918.41
  -1   4  -1 5738.94  878.25
  -1  -4   1 6141.62  911.11
   1  -4  -1 6188.73  944.74
   1  -4  -1 5763.07  881.79
  -1  -4   1 5985.59  922.83
   1  -4  -1 6093.76  935.27
  -1   4  -1 5499.79  846.93
   1  -4  -1 6116.91  916.70
  -1  -4   1 5779.97  843.69
  -1  -4   1 5920.76  905.08
  -1   4  -1 6125.00  913.03
  -1  -4   1 5312.45  824.63
   1  -5   1 1965.09  251.29
  -1  -5  -1 2959.29  346.04
   1  -5   1 2986.17  360.06
  -1  -5  -1 3094.95  341.90
  -1  -5  -1 2965.76  352.88
  -1  -5  -1 3023.44  350.55
  -1   5   1 2702.04  369.94
   1  -5   1 3218.07  393.36
  -1  -5  -1 3143.38  374.22
  -1  -5  -1 3016.33  338.02
   1   5  -1 2909.52  361.52
   1   5  -1 3041.61  361.59
  -1   5   1 3012.78  340.12
  -1   5   1 2983.61  366.24
   1   5  -1 2839.35  355.01
   1   5  -1 2820.41  348.91
  -1  -5  -1 3557.23  423.03
  -1   5   1 3234.79  467.74
  -1   5   1 2975.31  363.32
   1  -5   1 2682.24  324.01
  -1  -5  -1 3072.76  362.94
   1   5  -1 2918.92  392.74
   1   5  -1 2892.63  355.63
   1   5  -1 2620.28  317.38
  -1   5  -1 2753.95  338.85
   1  -5  -1 3112.26  372.86
   1  -5  -1 3200.56  390.28
  -1  -5   1 2888.81  353.06
  -1  -5   1 2776.64  316.38
  -1  -5   1 3063.95  351.62
   1  -5  -1 3253.97  396.96
   1   5   1 3007.99  365.26
  -1   5  -1 3060.00  360.63
  -1   5  -1 2821.26  323.80
  -1  -5   1 2986.19  370.81
  -1   5  -1 2750.49  341.49
   1   5   1 2808.81  341.98
  -1   5  -1 3026.50  360.80
  -1   5  -1 3022.02  357.13
  -1   5  -1 2723.51  334.50
   1  -5  -1 3551.14  447.46
  -1  -5   1 3021.59  365.09
   1  -5  -1 3450.00  476.71
   1  -5  -1 2901.70  342.87
   1  -5  -1 3116.22  380.53
  -1   5  -1 2877.83  352.20
  -1  -5   1 3077.20  363.02
   1  -5  -1 3145.85  388.62
  -1  -5   1 3164.67  388.19
  -1   6   1 1761.36  168.11
  -1  -6  -1 1840.37  187.14
   1  -6   1 1796.31  186.25
  -1  -6  -1 1841.62  169.65
   1  -6   1 1708.88  180.63
   1  -6   1 1237.94  139.31
  -1  -6  -1 1915.45  190.60
   1  -6   1 1687.04  174.03
  -1  -6  -1 1854.68  181.52
  -1   6   1 1813.66  188.52
  -1   6   1 1976.27  255.33
   1   6  -1 1656.13  171.13
  -1   6   1 1672.34  191.49
  -1   6   1 1830.83  220.17
  -1  -6  -1 1781.42  179.74
  -1  -6  -1 1731.22  159.24
   1   6  -1 1761.71  188.85
   1   6  -1 1724.44  182.08
   1   6  -1 1803.27  182.23
   1   6  -1 1741.95  185.04
   1   6  -1 1778.61  192.82
   1   6  -1 1761.94  214.16
  -1  -6  -1 1778.62  181.23
   1  -6  -1 1745.63  189.14
  -1  -6   1 1728.73  166.54
  -1   6  -1 1973.71  188.32
   1   6   1 1754.71  183.46
  -1  -6   1 1920.49  205.24
  -1   6  -1 1502.03  161.66
  -1   6  -1 1796.80  181.22
  -1   6  -1 1615.67  172.72
  -1   6  -1 1781.75  188.04
  -1   6  -1 1589.53  169.74
  -1  -6   1 1851.82  189.72
  -1  -6   1 1804.80  189.01
  -1  -6   1 1670.81  176.20
   1  -6  -1 2013.63  210.78
  -1  -6   1 1732.93  165.13
   1  -6  -1 1722.68  174.91
   1  -6  -1 1631.61  180.12
   1  -6  -1 1940.02  203.29
   1   6   1 1654.78  173.15
  -1  -6   1 1928.54  191.84
   1  -6  -1 1659.28  176.20
  -1   6  -1 1933.40  197.39
   1   7  -1  283.09   25.77
   1   7  -1  297.54   26.54
  -1  -7  -1  277.90   14.94
  -1  -7  -1  306.58   17.77
  -1  -7  -1  289.22   21.69
  -1  -7  -1  318.11   25.51
   1  -7   1  303.63   25.28
   1  -7   1  303.34   27.60
  -1  -7  -1  307.97   24.16
   1  -7   1  208.12   24.30
  -1  -7  -1  320.06   25.58
  -1   7   1  273.67   33.35
  -1   7   1  288.68   16.11
  -1   7   1  295.13   29.60
  -1   7   1  287.16   51.64
  -1  -7  -1  336.28   23.61
   1  -7   1  307.16   26.86
   1   7  -1  278.90   23.34
   1   7  -1  295.74   29.41
   1   7  -1  298.95   23.60
   1   7  -1  291.93   40.71
  -1   7   1  305.42   36.36
   1  -7  -1  372.39   31.65
   1  -7  -1  308.88   28.39
  -1   7  -1  284.62   27.08
   1   7   1  285.82   25.60
  -1   7  -1  271.38   25.99
  -1   7  -1  337.02   27.68
  -1   7  -1  243.83   24.39
  -1  -7   1  282.19   18.85
  -1   7  -1  296.48   19.61
   1   7   1  273.26   24.37
  -1   7  -1  294.08   23.97
  -1   7  -1  264.87   25.52
   1  -7  -1  336.33   29.77
  -1  -7   1  352.80   32.60
  -1  -7   1  302.01   18.27
   1  -7  -1  289.47   22.52
  -1  -7   1  312.14   27.43
   1  -7  -1  325.48   31.57
   1  -7  -1  308.25   24.77
  -1   7  -1  319.73   19.82
  -1  -7   1  299.83   27.06
  -1  -7   1  338.45   26.16
  -1  -7   1  297.48   28.66
  -1  -8  -1  594.95   44.66
  -1   8   1  604.75   38.75
  -1   8   1  555.82   75.98
  -1  -8  -1  573.58   38.36
  -1  -8  -1  628.24   48.31
   1  -8   1  455.73   43.93
  -1   8   1  548.89   56.18
   1  -8   1  615.17   50.70
  -1  -8  -1  525.21   32.56
  -1  -8  -1  609.40   48.18
   1  -8   1  635.68   53.08
  -1   8   1  433.90   39.44
   1   8  -1  571.42   47.68
   1   8  -1  592.11   68.11
  -1   8   1  542.92   44.30
  -1   8   1  580.17   53.26
   1  -8   1  613.46   49.02
  -1  -8  -1  639.41   50.14
  -1  -8  -1  644.94   47.68
   1   8  -1  600.10   54.37
   1   8  -1  602.40   50.06
  -1  -8  -1  563.63   35.38
   1   8  -1  481.55   38.50
  -1   8   1  506.85   47.88
   1   8  -1  603.12   47.17
   1   8   1  566.47   48.52
  -1  -8   1  636.19   47.51
  -1  -8   1  639.31   52.63
  -1  -8   1  565.36   38.87
   1  -8  -1  660.96   55.60
   1  -8  -1  591.69   47.50
  -1  -8   1  547.05   36.52
  -1   8  -1  482.29   44.00
   1  -8  -1  582.32   47.81
  -1   8  -1  550.28   48.97
  -1   8  -1  566.40   40.55
  -1   8  -1  509.94   45.33
  -1   8  -1  540.73   47.46
  -1   8  -1  511.03   40.66
  -1   8  -1  500.43   33.66
   1   8   1  562.36   47.28
   1  -8  -1  360.55   38.44
  -1   8  -1  557.38   45.21
  -1  -8   1  639.43   52.60
   1  -8  -1  693.71   59.73
   1  -8  -1  576.59   43.59
  -1   8  -1  556.86   38.07
  -1  -8   1  728.37   61.56
  -1  -8   1  589.74   44.95
  -1  -8   1  546.78   39.66
  -1   9   1  137.55   16.73
  -1  -9  -1  138.80   16.81
  -1  -9  -1  157.52   13.84
   1  -9   1  156.03   15.11
   1  -9   1  149.77   14.39
   1  -9   1  148.47   13.21
   1  -9   1  112.30   14.79
   1   9  -1  140.21   13.40
  -1  -9  -1  158.48   12.13
  -1  -9  -1  147.96   11.68
  -1  -9  -1  148.18   13.14
  -1   9   1  139.44    7.38
  -1   9   1  116.23   15.03
   1   9  -1  113.03   10.44
   1   9  -1  113.45   11.80
  -1   9   1  133.33   19.42
  -1   9   1  110.55   12.22
  -1   9   1  122.49   28.16
  -1  -9  -1  154.31    6.88
  -1  -9  -1  145.14    8.60
  -1  -9  -1  146.82    6.70
   1   9  -1  142.61   16.76
   1   9  -1  147.05   25.15
   1   9  -1  143.96   12.54
  -1   9   1  131.12   12.05
  -1  -9   1  144.30   10.02
  -1  -9   1  180.84   18.19
  -1  -9   1  156.19   14.93
   1  -9  -1  145.68   11.15
   1   9   1  130.54   13.84
   1   9   1  130.99   13.14
  -1   9  -1  134.56   14.97
  -1   9  -1  141.92    7.63
  -1   9  -1  127.62    7.75
  -1   9  -1  129.34   12.42
  -1   9  -1  122.70   11.36
   1  -9  -1  168.95   15.02
  -1  -9   1  146.73    9.31
   1  -9  -1  169.11   16.59
   1  -9  -1  145.17   14.02
   1  -9  -1  141.84   13.40
   1  -9  -1  179.83   18.06
   1  -9  -1  147.88   13.68
  -1   9  -1  120.54   13.76
  -1   9  -1  128.91   13.97
  -1   9  -1  109.90   13.64
  -1  -9   1  157.90   12.15
  -1  -9   1  138.12    7.48
  -1  -9   1  162.14   15.50
  -1  -9   1  146.90   11.36
  -1   9  -1  132.35    9.59
   1  10  -1 1346.04  151.26
  -1  10   1 1071.24  101.84
  -1  10   1 1256.24  129.15
  -1 -10  -1 1313.33  117.16
   1 -10   1 1128.71  111.90
   1 -10   1 1129.32  114.62
  -1 -10  -1 1217.57   96.97
   1  10  -1 1141.97  114.70
   1  10  -1 1051.58   99.34
   1 -10   1 1350.67  123.48
  -1 -10  -1 1324.40  118.36
   1  10  -1 1043.79   96.51
  -1 -10  -1 1196.74  108.01
  -1 -10  -1 1205.98  102.47
  -1  10   1 1083.88  109.35
  -1  10   1 1124.31   93.17
  -1  10   1 1143.42  139.25
  -1  10   1 1269.14  124.99
  -1  10   1 1161.77  107.64
  -1 -10  -1 1390.77  126.61
  -1 -10  -1 1253.71  115.06
  -1 -10  -1 1247.27   98.81
   1 -10   1 1269.55  117.74
   1 -10   1 1246.62  114.85
   1  10  -1 1283.23  120.11
   1  10  -1 1326.52  131.20
   1 -10  -1 1074.54  100.35
  -1 -10   1 1266.62  110.82
   1 -10  -1 1581.00  147.96
   1 -10  -1 1334.19  125.98
   1  10   1 1137.72  108.51
  -1  10  -1 1114.44  102.73
  -1  10  -1 1044.09   88.59
  -1  10  -1 1213.54  118.29
  -1  10  -1 1123.60   99.25
  -1  10  -1 1128.75  106.64
  -1  10  -1  987.24   99.09
  -1  10  -1 1067.09  104.90
  -1  10  -1 1001.51   90.14
   1  10   1 1154.52  111.45
   1  10   1 1149.04  104.57
  -1 -10   1 1157.59   95.55
  -1 -10   1 1444.81  133.46
  -1 -10   1 1247.83  107.38
   1 -10  -1 1422.11  131.80
   1 -10  -1 1313.60  120.98
   1 -10  -1 1215.20  114.16
  -1  10  -1 1182.30  113.83
  -1 -10   1 1686.08  176.97
  -1 -10   1 1357.24  120.77
  -1 -10   1 1357.24  120.35
  -1 -10   1 1251.48  127.40
   1 -10  -1 1269.22  118.20
  -1 -11  -1  973.84   81.30
  -1 -11  -1  855.72   70.79
  -1 -11  -1  872.32   74.15
  -1 -11  -1  867.91   60.84
  -1 -11  -1  836.75   64.65
   1 -11   1  898.89   76.86
  -1 -11  -1  817.00   57.81
  -1  11   1  766.86   66.98
  -1  11   1  815.73   82.09
   1  11  -1  735.63   64.34
   1  11  -1  882.67   98.97
  -1  11   1  774.64   66.32
  -1  11   1 1078.77   83.82
  -1  11   1  824.80   78.61
  -1  11   1  733.13   71.36
  -1  11   1  737.45   91.22
  -1 -11  -1  938.22   76.54
   1 -11   1  853.94   79.15
   1 -11   1  893.48   76.33
   1 -11   1  867.83   74.06
   1 -11   1  787.33   66.81
  -1 -11  -1  913.74   75.39
   1  11  -1  704.47   60.82
   1  11  -1  759.19   65.01
   1  11  -1  882.59   75.94
   1  11  -1  884.68   83.47
   1 -11  -1  825.05   70.60
  -1 -11   1  831.62   63.77
  -1 -11   1  971.19   77.77
  -1 -11   1  871.15   68.72
  -1  11  -1  804.24   74.48
   1  11   1  767.58   68.81
   1 -11  -1  941.57   80.12
  -1  11  -1  760.17   65.62
  -1  11  -1  781.70   56.67
  -1  11  -1  751.41   61.39
  -1  11  -1  743.00   66.60
  -1  11  -1  912.46   70.60
  -1  11  -1  810.32   72.74
   1  11   1  751.44   63.99
   1  11   1  769.52   69.97
  -1 -11   1  967.25   78.38
  -1 -11   1  873.93   76.53
   1 -11  -1 1127.42   97.55
   1 -11  -1  826.67   72.68
  -1 -11   1  806.47   69.41
   1 -11  -1  828.45   65.89
   1 -11  -1 1036.83   89.71
  -1  11  -1  730.82   67.60
   1  11   1  851.82   68.37
  -1 -11   1  869.70   74.27
   1 -11  -1  894.27   77.08
  -1 -11   1  904.81   72.27
   1  12  -1  502.14   39.78
  -1  12   1  466.48   47.66
  -1 -12  -1  476.21   28.52
   1  12  -1  417.98   34.25
  -1 -12  -1  497.94   37.82
   1 -12   1  525.89   46.24
   1 -12   1  512.44   39.99
   1 -12   1  514.02   39.41
  -1 -12  -1  510.45   31.17
  -1 -12  -1  535.59   41.41
  -1 -12  -1  576.43   42.86
  -1 -12  -1  579.86   43.89
  -1  12   1  432.84   56.36
   1  12  -1  504.74   58.50
   1  12  -1  498.14   46.55
  -1  12   1  585.15   37.91
  -1  12   1  440.28   34.69
  -1 -12  -1  516.06   35.04
  -1  12   1  447.58   36.21
  -1  12   1  416.10   39.92
  -1  12   1  460.74   43.21
   1 -12   1  532.25   41.84
   1 -12   1  561.19   44.41
   1  12  -1  420.19   33.75
   1  12  -1  400.46   32.40
  -1 -12   1  607.07   42.42
  -1 -12   1  510.10   41.66
   1 -12  -1  541.18   41.95
  -1 -12   1  507.07   40.13
  -1 -12   1  505.73   39.99
  -1  12  -1  460.30   39.49
  -1  12  -1  458.98   41.45
  -1  12  -1  414.80   31.42
   1 -12  -1  538.27   42.04
  -1 -12   1  520.63   36.61
  -1  12  -1  477.37   29.35
  -1  12  -1  474.74   43.50
  -1  12  -1  417.23   36.41
  -1  12  -1  412.43   36.83
   1  12   1  450.39   33.38
   1  12   1  412.68   33.32
   1  12   1  415.65   35.88
   1 -12  -1  488.04   40.12
   1 -12  -1  619.98   49.98
  -1  12  -1  496.56   34.23
  -1  12  -1  441.41   35.88
  -1 -12   1  485.79   30.46
   1  12   1  571.41   49.46
   1 -12  -1  511.50   35.88
  -1 -12   1  567.09   40.15
   1 -12  -1  596.18   46.28
   1  13  -1   82.65   11.98
   1  13  -1   71.11    7.48
   1  13  -1   82.83   17.92
   1  13  -1   80.30    7.47
  -1 -13  -1   90.99    3.68
  -1  13   1   66.85   10.14
   1  13  -1   86.22   12.08
   1  13  -1   72.57    7.85
  -1 -13  -1   84.83    6.01
   1 -13   1   86.05    8.71
  -1 -13  -1   98.79    9.19
   1  13  -1   64.55    7.26
  -1 -13  -1   78.16    3.47
  -1 -13  -1   83.40    7.75
   1 -13   1   95.06   10.12
   1 -13   1   97.55    9.94
  -1  13   1   79.33   11.75
  -1  13   1   69.43   10.37
  -1  13   1   84.67    5.13
  -1  13   1   73.83   18.44
   1 -13   1   93.72   11.94
  -1 -13  -1   90.10    8.92
  -1  13   1   71.83    6.96
   1 -13   1   92.05    8.79
  -1  13   1   78.04   13.48
  -1 -13   1   86.09    9.01
  -1 -13   1   87.42    9.71
  -1 -13   1   85.71    8.91
  -1  13  -1   74.41    9.35
   1  13   1   69.61    8.31
  -1  13  -1   67.43    9.37
  -1  13  -1   77.03   10.87
  -1  13  -1   74.73    8.56
   1  13   1   79.55    7.66
   1  13   1   70.24    7.54
   1  13   1   69.44    6.31
   1  13   1   92.56   11.76
   1 -13  -1  100.31   11.40
   1 -13  -1   81.61    9.38
  -1 -13   1   86.63    6.70
  -1 -13   1   89.68    6.51
   1 -13  -1   90.97    8.97
   1 -13  -1   98.18   10.30
   1 -13  -1   94.80    9.47
   1 -13  -1   88.01    6.62
  -1  13  -1   76.58    3.67
  -1  13  -1   67.05    6.51
  -1  13  -1   81.59    5.59
  -1  13  -1   66.73    8.58
  -1 -13   1   83.11    4.18
  -1 -13   1   95.85    7.38
   1  14  -1  312.21   30.56
  -1  14   1  260.34   26.10
  -1  14   1  262.47   19.05
  -1  14   1  276.01   39.07
  -1 -14  -1  364.07   18.76
  -1 -14  -1  329.22   21.81
  -1 -14  -1  315.02   23.93
  -1  14   1  281.03   21.41
   1 -14   1  359.30   28.14
   1  14  -1  325.20   29.86
   1 -14   1  353.42   28.45
   1 -14   1  374.11   27.60
  -1 -14  -1  363.92   26.90
  -1 -14  -1  309.33   16.57
  -1 -14  -1  333.49   25.53
   1  14  -1  306.20   39.75
   1  14  -1  282.56   22.24
   1  14  -1  248.35   19.93
   1  14  -1  270.85   21.53
   1 -14   1  339.75   25.77
  -1  14   1  294.31   32.08
  -1  14   1  293.06   28.98
   1 -14   1  365.89   32.20
   1  14  -1  312.56   23.37
  -1  14   1  287.77   18.05
  -1  14   1  290.68   23.95
   1 -14  -1  380.41   28.69
  -1 -14   1  325.20   26.35
  -1 -14   1  368.64   25.32
   1 -14  -1  356.38   23.16
   1  14   1  258.34   22.51
  -1  14  -1  278.25   24.27
  -1  14  -1  304.74   19.95
  -1  14  -1  254.48   19.45
  -1  14  -1  253.04   23.14
  -1  14  -1  303.54   16.74
  -1  14  -1  289.14   27.20
  -1  14  -1  276.35   23.27
   1  14   1  344.50   30.46
   1  14   1  301.37   23.05
   1 -14  -1  384.38   31.94
  -1 -14   1  365.05   23.94
   1 -14  -1  303.15   25.76
   1 -14  -1  349.38   26.64
  -1 -14   1  307.01   17.35
   1 -14  -1  395.53   30.74
   1  14   1  273.77   21.98
   1  14   1  254.80   19.24
  -1 -14   1  341.02   26.41
  -1 -14   1  341.38   26.60
  -1 -14   1  334.04   22.98
   1  15  -1  287.16   22.56
   1  15  -1  260.97   21.20
   1  15  -1  315.48   24.40
  -1  15   1  305.88   23.26
  -1  15   1  265.09   26.64
  -1 -15  -1  319.96   24.64
  -1 -15  -1  375.60   27.82
   1 -15   1  365.57   28.89
   1 -15   1  385.90   28.81
   1 -15   1  377.08   33.82
   1 -15   1  353.89   26.73
  -1 -15  -1  341.80   26.24
  -1 -15  -1  339.88   22.82
  -1 -15  -1  275.94   15.05
  -1  15   1  287.94   24.55
  -1 -15  -1  359.65   18.64
  -1  15   1  278.23   19.78
  -1  15   1  279.36   39.95
  -1  15   1  307.39   30.54
   1  15  -1  305.28   38.59
   1  15  -1  298.98   23.03
  -1  15   1  263.60   16.99
  -1 -15  -1  407.64   28.95
  -1  15   1  301.91   33.21
   1 -15   1  366.89   30.23
   1  15  -1  321.71   31.66
   1  15  -1  327.13   29.28
  -1 -15   1  331.51   23.39
  -1 -15   1  328.86   26.74
   1  15   1  306.37   23.90
  -1  15  -1  268.80   23.37
   1  15   1  331.19   30.83
   1  15   1  256.50   22.23
   1  15   1  242.47   19.05
  -1  15  -1  296.69   28.64
  -1  15  -1  308.43   20.45
  -1 -15   1  314.77   18.01
  -1  15  -1  282.28   25.01
  -1  15  -1  305.09   17.07
  -1  15  -1  242.43   19.35
  -1  15  -1  287.24   25.79
   1  15   1  274.72   22.32
   1 -15  -1  364.61   23.81
   1 -15  -1  316.88   27.40
   1 -15  -1  400.92   30.45
   1 -15  -1  392.41   33.41
   1 -15  -1  349.13   26.79
   1 -15  -1  401.76   31.87
   1 -15  -1  275.30   24.89
  -1  15  -1  253.90   23.73
  -1 -15   1  371.51   26.03
  -1 -15   1  342.34   26.97
  -1 -15   1  361.96   28.23
  -1 -15   1  403.96   26.48
   1  16  -1  188.61   16.03
   1  16  -1  242.23   22.05
  -1  16   1  211.45   33.35
  -1 -16  -1  350.26   35.28
  -1 -16  -1  240.66   18.65
  -1  16   1  185.55   11.80
   1 -16   1  287.70   27.70
   1 -16   1  265.74   21.13
  -1 -16  -1  192.35    9.84
   1 -16   1  288.85   21.89
   1 -16   1  261.45   20.18
   1 -16   1  275.01   23.64
  -1 -16  -1  259.32   20.20
  -1 -16  -1  292.18   21.02
  -1  16   1  212.30   14.79
   1  16  -1  223.34   18.34
   1  16  -1  204.81   16.11
   1  16  -1  248.61   25.15
  -1  16   1  229.97   24.57
  -1  16   1  218.51   19.11
   1  16  -1  228.14   31.25
  -1  16   1  235.13   28.07
  -1  16   1  226.68   16.99
   1 -16   1  245.87   22.80
   1  16  -1  208.98   16.97
  -1 -16  -1  253.57   20.59
  -1  16   1  194.88   21.26
  -1 -16   1  267.92   19.14
  -1 -16   1  262.72   20.70
   1 -16  -1  238.59   30.77
   1  16   1  238.90   23.22
  -1  16  -1  185.05   18.34
  -1  16  -1  172.30   18.40
  -1  16  -1  221.78   11.69
  -1  16  -1  211.49   19.43
  -1  16  -1  234.78   15.15
  -1  16  -1  218.05   22.73
   1  16   1  206.15   21.06
   1  16   1  192.92   21.69
   1  16   1  216.86   18.09
   1  16   1  183.72   15.05
   1 -16  -1  268.22   20.30
  -1 -16   1  247.35   17.69
  -1 -16   1  274.85   21.80
  -1 -16   1  311.20   19.59
   1 -16  -1  236.85   20.38
   1 -16  -1  301.75   26.69
   1 -16  -1  292.46   18.51
   1 -16  -1  297.46   32.98
   1 -16  -1  294.70   23.15
  -1  16  -1  211.88   19.98
  -1  16  -1  198.05   18.19
   1  16   1  189.46   16.25
  -1 -16   1  215.03   11.90
  -1 -16   1  252.62   20.86
   1  17  -1   20.45    3.79
  -1  17   1   10.69   11.21
  -1  17   1   22.51    4.87
  -1 -17  -1   27.01    4.46
  -1 -17  -1   34.27    6.27
  -1 -17  -1   25.39    4.51
   1 -17   1   28.11    7.71
   1 -17   1   28.18    5.31
   1 -17   1   27.53    6.41
   1 -17   1   20.88    4.71
   1 -17   1   28.47    5.26
  -1  17   1   20.45    7.64
  -1 -17  -1   28.24    5.06
   1 -17   1   44.63    6.59
  -1  17   1   23.86    2.88
  -1  17   1   16.97    6.06
  -1  17   1   23.61    8.29
   1  17  -1   15.82    3.87
  -1  17   1   28.43    3.59
  -1  17   1   20.82    3.37
  -1 -17  -1   28.68    3.84
   1  17  -1   25.79    6.83
   1  17  -1   20.19    4.62
   1  17  -1   20.31    4.05
   1  17  -1   23.11    3.37
   1  17  -1   22.65   10.34
  -1 -17   1   30.70    3.38
  -1 -17   1   24.72    5.04
  -1 -17   1   22.65    3.50
   1  17   1   19.26    5.76
   1  17   1   15.10    3.22
   1 -17  -1   23.55    5.96
  -1  17  -1   18.23    8.50
   1 -17  -1   28.93    5.92
  -1  17  -1   21.34    3.89
  -1  17  -1   17.76    4.99
  -1  17  -1   20.35    1.32
  -1  17  -1   23.43    6.96
  -1  17  -1   21.89    2.49
  -1  17  -1   16.47    5.20
   1  17   1   19.70    4.34
   1  17   1   41.16    6.68
   1  17   1   19.99    4.63
  -1  17  -1   19.06    4.84
   1 -17  -1   27.45    7.01
  -1 -17   1   24.64    4.96
  -1 -17   1   28.47    5.39
   1 -17  -1   25.49    3.14
   1 -17  -1   22.73    4.91
   1 -17  -1   29.62    5.84
   1 -17  -1   25.93    4.31
   1  17   1   17.42    4.04
  -1 -17   1   26.56    4.14
   1  18  -1  196.76   14.06
   1  18  -1  167.94   13.52
   1  18  -1  162.10   14.07
  -1  18   1  177.17   16.43
  -1 -18  -1  282.14   22.56
  -1  18   1  178.18   30.57
  -1 -18  -1  243.76   17.74
   1 -18   1  244.45   24.16
   1 -18   1  222.97   18.19
   1 -18   1  224.43   16.65
   1 -18   1  206.50   19.95
   1 -18   1  238.48   21.18
  -1 -18  -1  262.12   17.64
  -1 -18  -1  229.43   17.68
  -1 -18  -1  200.93   16.65
  -1  18   1  161.90   19.34
  -1  18   1  180.67   12.42
   1  18  -1  180.17   26.47
   1  18  -1  152.24   13.86
  -1  18   1  191.34   24.97
  -1  18   1  179.56   13.44
  -1  18   1  193.89   22.53
   1  18  -1  202.83   21.52
   1  18  -1  171.16   15.51
  -1 -18   1  232.34   18.53
  -1 -18   1  233.15   18.93
  -1 -18   1  237.97   17.46
  -1 -18   1  217.58   18.15
  -1 -18   1  208.52   15.17
   1  18   1  131.04   12.96
   1  18   1  166.83   15.36
   1 -18  -1  200.31   17.13
   1 -18  -1  243.05   19.95
  -1  18  -1  183.92   15.31
  -1  18  -1  181.30   19.14
  -1  18  -1  172.92   16.44
  -1  18  -1  172.04   16.14
  -1  18  -1  187.46   21.11
   1  18   1  180.95   15.69
  -1  18  -1  165.28   17.21
   1  18   1  169.49   18.78
   1  18   1  139.63   12.23
  -1 -18   1  253.52   15.72
   1 -18  -1  147.93   13.65
   1 -18  -1  226.52   14.75
   1 -18  -1  215.63   20.31
   1 -18  -1  262.78   23.57
   1  18   1  177.88   17.85
   1  19  -1  115.86   11.92
   1  19  -1  121.44   22.59
   1  19  -1  134.17   16.53
   1  19  -1  120.15   10.21
  -1  19   1  114.53   11.90
  -1  19   1  114.93   15.21
  -1  19   1  124.94    8.79
  -1 -19  -1  179.22   12.69
  -1 -19  -1  160.83   13.27
  -1  19   1  122.13    9.52
  -1  19   1  137.77   20.35
   1 -19   1  174.78   19.06
   1 -19   1  146.00   15.47
   1 -19   1  154.48   13.55
   1 -19   1  205.21   29.35
  -1 -19  -1  173.93   13.32
  -1 -19  -1  139.87   12.26
  -1 -19  -1  199.93   16.82
   1  19  -1  129.80    9.90
  -1  19   1  107.61   10.09
  -1  19   1  122.45   24.48
  -1  19   1  135.68   17.85
   1  19  -1  103.21   10.46
  -1 -19   1  141.43   10.93
  -1 -19   1  148.55   13.61
   1 -19  -1  153.26   12.02
   1  19   1  108.73   11.65
   1  19   1  115.28   14.69
  -1  19  -1  108.40   13.14
  -1 -19   1  189.26   16.28
   1 -19  -1  148.43   10.19
  -1  19  -1  129.61   15.53
  -1  19  -1  131.30   16.97
  -1  19  -1  117.99   12.18
  -1  19  -1  128.20   11.50
  -1  19  -1  117.04   10.04
  -1  19  -1  121.95   12.48
   1  19   1  114.10   12.94
   1 -19  -1  140.90   13.09
   1 -19  -1  153.48   15.94
  -1 -19   1  165.86   12.75
   1 -19  -1  179.91   18.40
   1  19   1   93.27    8.93
   1 -19  -1  169.26   15.26
   1  19   1  124.09   11.29
  -1 -19   1  164.08   14.31
  -1 -19   1  166.90   13.76
   1  20  -1    6.98    2.78
   1  20  -1    9.59    5.01
  -1  20   1   10.10    6.51
  -1  20   1    6.09    3.31
  -1 -20  -1   11.33    3.17
  -1  20   1    8.54    2.85
   1 -20   1   12.30    4.54
   1 -20   1   13.02    4.88
   1 -20   1   15.73    5.52
   1  20  -1    9.84    3.66
   1 -20   1   12.42    3.58
   1 -20   1   13.32    5.62
  -1 -20  -1   11.63    2.74
  -1  20   1    5.25    8.34
  -1 -20  -1   10.56    3.20
  -1 -20  -1    8.25    3.08
  -1  20   1    8.42    4.64
  -1  20   1    8.23    2.72
   1  20  -1    9.43    7.39
  -1  20   1   10.51    6.16
   1  20  -1    8.62    2.63
  -1  20   1    8.06    2.08
   1  20  -1   10.30    2.17
  -1 -20  -1   12.39    4.29
  -1 -20   1    9.22    2.97
  -1 -20   1   12.09    3.43
  -1 -20   1   10.08    3.53
   1 -20  -1   10.75    3.34
   1 -20  -1    9.75    2.76
  -1 -20   1   12.80    2.62
   1  20   1    8.75    2.81
   1  20   1    6.76    2.38
   1 -20  -1    9.05    2.05
   1 -20  -1   14.55    5.42
  -1  20  -1    8.06    2.70
  -1  20  -1    8.80    2.89
  -1  20  -1   10.64    5.63
  -1  20  -1    9.35    4.70
  -1  20  -1    6.04    3.76
  -1  20  -1   11.21    3.28
  -1  20  -1    9.16    3.42
   1  20   1    7.80    3.66
   1  20   1    7.89    4.55
   1  20   1    9.01    3.45
   1 -20  -1   11.39    4.63
   1 -20  -1   11.29    4.18
  -1 -20   1   11.60    4.33
   1  21  -1   79.57   12.65
  -1 -21  -1  116.56   11.76
  -1 -21  -1   98.42    9.42
  -1  21   1   66.64   19.76
   1 -21   1  104.07   14.39
  -1  21   1   66.19    9.35
   1 -21   1   99.33    8.67
  -1  21   1   84.32   15.10
  -1  21   1   78.59    5.80
   1 -21   1  128.11   10.77
   1 -21   1  124.94   14.96
   1 -21   1   88.58   11.94
  -1 -21  -1  110.74    9.77
  -1 -21  -1  100.40    8.43
  -1  21   1   63.30    7.34
  -1  21   1   64.03   11.55
   1  21  -1   84.44   13.56
   1  21  -1   61.19    7.75
   1  21  -1   73.78    7.25
   1  21  -1   84.05    6.73
  -1  21   1   75.16   15.98
  -1  21   1   71.25    6.18
  -1 -21  -1   85.07    8.98
   1  21  -1   78.17   18.18
   1  21  -1   60.49    7.64
  -1  21  -1   69.19    8.43
   1  21   1   80.94   13.18
   1  21   1   52.87    6.35
   1 -21  -1   96.52   12.51
   1 -21  -1  114.28   14.34
  -1  21  -1   78.79    8.59
  -1  21  -1   81.69   13.93
  -1  21  -1   75.74   11.88
  -1  21  -1   72.15    8.91
  -1  21  -1   67.83    7.16
  -1 -21   1  102.93    7.94
   1  21   1   69.78   11.79
   1  21   1   59.39    8.26
   1 -21  -1   83.38    9.50
   1 -21  -1   91.89    8.16
  -1 -21   1   92.80    8.29
  -1 -21   1   92.43    8.67
  -1 -21   1   90.49   10.02
   1 -21  -1   84.01    6.46
   1 -21  -1  105.70   11.42
   1  21   1   75.06    7.72
  -1 -21   1  106.73    9.87
   1  22  -1   74.06    7.27
  -1  22   1   78.32   16.64
   1  22  -1   73.24   17.73
  -1  22   1   79.29    5.80
   1 -22   1   93.72   12.13
   1 -22   1  115.36   15.72
   1 -22   1   94.48    8.44
  -1 -22  -1   85.24    9.17
  -1 -22  -1  110.30   10.02
  -1 -22  -1   99.84    8.66
  -1 -22  -1  118.45   11.75
  -1  22   1   63.18   11.58
   1  22  -1   78.61   11.92
  -1  22   1   78.38   14.39
   1  22  -1   90.55   14.32
  -1  22   1   68.47   19.73
   1  22  -1   67.43    8.16
   1  22  -1   61.22    7.85
   1  22   1   79.45   13.19
   1  22   1   73.62    7.52
   1 -22  -1   89.87   12.18
  -1  22  -1   84.95   14.77
  -1  22  -1   71.02    7.67
  -1  22  -1   68.40    8.26
  -1  22  -1   74.07   11.83
  -1  22  -1   77.20    8.89
  -1  22  -1   76.78    9.18
   1 -22  -1   85.67    9.47
   1 -22  -1  118.90   12.64
   1  22   1   69.54   11.98
   1  22   1   51.25    6.56
  -1 -22   1   92.05   10.23
   1 -22  -1   90.62    7.79
   1  22   1   57.60    8.10
  -1 -22   1   93.16    8.38
  -1 -22   1   97.15    9.06
  -1 -23  -1   46.56    6.70
  -1  23   1   44.74    3.91
  -1  23   1   34.21    8.51
  -1 -23  -1   55.39    6.17
  -1  23   1   41.22   12.42
   1 -23   1   50.16    5.76
   1 -23   1   49.01    8.72
  -1 -23  -1   62.52    8.29
  -1 -23  -1   60.82    7.14
   1  23  -1   43.30    5.47
   1  23  -1   46.70   11.06
  -1  23   1   45.66   11.72
   1  23  -1   33.13    5.80
   1  23  -1   44.13    9.60
   1  23   1   37.05    8.87
   1  23   1   43.03   10.54
  -1  23  -1   40.11    9.10
  -1  23  -1   39.28    5.91
  -1  23  -1   46.38   11.46
   1  23   1   41.86    5.22
   1 -23  -1   37.02    6.67
  -1 -23   1   52.06    7.59
   1 -23  -1   51.48    9.34
   1 -23  -1   50.35    5.54
  -1 -23   1   55.21    6.59
   1  23   1   29.83    4.88
  -1 -23   1   49.97    5.93
   1  24  -1    8.31    5.05
   1 -24   1    8.47    2.59
   1 -24   1    8.17    4.47
  -1 -24  -1    7.46    3.30
  -1  24   1    7.33    7.01
   1  24  -1    9.65    5.93
  -1  24   1    8.51    6.93
  -1 -24  -1    8.71    2.88
   1  24  -1    4.89    4.26
   1  24  -1    6.84    5.81
  -1 -24  -1    9.73    3.79
   1  24   1    8.58    2.49
   1  24   1    5.47    2.51
   1 -24  -1    7.23    3.39
  -1  24  -1    8.09    5.00
  -1  24  -1    7.02    2.91
  -1  24  -1    7.92    6.54
  -1  24  -1    8.27    3.37
  -1  24  -1    5.10    5.56
   1  24   1    9.73    5.96
   1  24   1    5.66    5.05
   1 -24  -1    8.05    2.54
  -1 -24   1    8.33    3.29
   1 -24  -1    9.50    4.88
  -1 -24   1    9.52    2.99
   1  25  -1  100.13   15.76
  -1  25   1   95.50   20.05
  -1 -25  -1  140.69   13.61
   1 -25   1  112.64   14.30
  -1 -25  -1  121.35   11.51
  -1 -25  -1  110.10   11.44
   1  25  -1   92.35   11.52
   1  25  -1   97.79   16.60
  -1  25   1  107.95   19.19
   1  25  -1  104.82    9.09
  -1 -25   1  100.36   10.72
   1  25   1   96.66   16.57
  -1  25  -1  106.11   18.51
  -1 -25   1  118.39   11.21
  -1  25  -1  101.73   11.34
  -1  25  -1   91.46   17.09
  -1  25  -1   93.60   14.71
   1  25   1   65.11    8.43
   1  25   1   85.74   15.43
   1 -25  -1   99.06   11.61
   1 -25  -1  117.50   15.52
   1  26  -1    0.28    3.05
  -1 -26  -1    0.01    3.43
   1 -26   1    0.67    2.62
   1  26  -1    0.58    1.92
   1 -26   1    1.00    1.71
  -1 -26  -1    1.85    1.64
  -1  26   1    0.43    3.97
  -1  26   1    1.24    4.12
   1  26  -1    0.00    3.54
   1  26   1    1.80    3.08
   1  26   1    1.03    3.49
  -1  26  -1    1.47    3.91
  -1  26  -1    0.12    3.38
  -1  26  -1    1.12    2.87
  -1  26  -1    0.01    1.92
   1  26   1    0.61    1.53
  -1 -26   1   -1.28    1.58
   1 -26  -1   -0.08    1.78
   1 -26  -1    0.76    2.89
  -1 -26   1    0.89    1.67
  -1  27   1   24.90   11.84
  -1  27   1   32.33   11.72
   1  27  -1   24.01    5.85
   1  27  -1   28.85    8.88
   1 -27   1   25.37    5.14
   1 -27   1   32.69    7.80
  -1 -27  -1   33.60    5.43
  -1 -27  -1   32.03    6.29
   1 -27  -1   35.06    8.64
  -1  27  -1   26.14    8.54
  -1  27  -1   30.45    5.76
  -1  27  -1   30.00   11.02
  -1  27  -1   29.79   10.09
   1  27   1   46.53   10.92
  -1 -27   1   33.35    5.52
   1  27   1   25.36    9.04
  -1 -27   1   32.38    4.96
  -1 -28  -1    6.04    3.28
  -1 -28  -1    5.71    2.74
   1  28  -1   27.32    6.56
  -1  28   1    4.33    6.91
  -1  28   1    2.87    6.81
   1 -28   1    5.91    4.52
   1  28  -1    4.33    5.16
   1  28  -1    4.63    3.17
   1 -28  -1    1.17    4.81
   1 -28  -1    6.12    4.87
  -1 -28   1    4.10    2.78
   1  28   1    4.75    5.43
   1  28   1   26.98    6.70
  -1  28  -1    4.85    5.77
  -1  28  -1    5.66    2.85
  -1  28  -1    5.76    6.56
  -1  28  -1    4.67    5.02
  -1 -28   1    2.63    2.58
  -1  29   1   35.87   13.97
  -1 -29  -1   40.46    6.20
   1  29  -1   35.77    6.96
   1 -29   1   49.95    9.54
  -1 -29  -1   47.95    7.50
  -1  29   1   51.20   13.85
   1  29  -1   37.91   10.63
   1  29  -1   39.95   12.34
  -1  29  -1   50.63   13.05
  -1  29  -1   42.50   11.83
  -1  29  -1   41.51   10.48
   1 -29  -1   48.97   10.27
   1 -29  -1   57.09   10.39
   1  29   1   33.49   10.75
   1  29   1   42.51   12.51
  -1 -29   1   41.86    6.21
  -1 -29   1   45.13    5.71
   1  30  -1   44.62   10.81
  -1  30   1   46.80   13.76
  -1 -30  -1   50.41    7.94
   1 -30   1   65.99   10.47
   1  30  -1   48.92   12.09
  -1 -30  -1   26.70    6.62
  -1 -30  -1   53.23    7.26
  -1  30   1   36.44   12.67
   1  30  -1   41.22    7.22
   1 -30  -1   66.57   11.00
  -1  30  -1   45.45   10.54
  -1  30  -1   57.76   20.49
  -1  30  -1   50.26   12.10
  -1 -30   1   54.54    6.02
   1  30   1   46.41   11.90
   1 -30  -1   71.39   11.08
   1  30   1   35.16   17.15
   1 -31   1   31.06    7.23
  -1 -31  -1   26.10    5.74
  -1  31   1   21.95   10.31
  -1  31   1   28.96    8.59
   1  31  -1   26.56    9.17
   1  31  -1   18.68    5.13
   1  31  -1   23.23    7.97
   1  31   1   24.52   10.17
   1  31   1   21.19   16.63
  -1  31  -1   22.93    8.85
  -1  31  -1   27.22    8.54
   1 -31  -1   31.74    7.81
  -1  31  -1   22.45    7.71
   1 -31  -1   27.20    7.56
  -1 -32  -1   10.43    3.93
   1 -32   1   11.09    5.21
   1  32  -1   11.42    6.71
   1  32  -1    5.88    6.02
   1  32  -1    7.48    3.42
  -1  32   1    9.29    7.45
  -1  32   1    7.58    6.27
   1 -32  -1   11.72    5.50
   1 -32  -1   11.31    5.62
   1  32   1    8.92    7.42
   1  32   1    7.45    6.72
  -1  32  -1    9.71    6.21
  -1  32  -1    6.41    6.25
  -1  32  -1   10.60    5.56
   1  33  -1    5.81    3.89
  -1 -33  -1   -0.41    2.22
   1 -33   1   -0.25    3.05
  -1  33   1   -0.04    4.28
  -1  33   1   -0.05    3.55
   1  33  -1    0.05    1.84
   1  33  -1    0.14    3.42
   1 -33  -1    5.00    3.56
  -1  33  -1   -0.07    3.63
  -1  33  -1    3.96    3.51
   1  33   1   -0.01    3.89
   1  33   1    0.59    4.24
   1 -33  -1   -0.14    3.18
  -1  34   1   -0.11    2.92
  -1 -34  -1   -0.18    1.88
   1 -34   1   -0.17    2.60
  -1  34   1   -0.04    3.71
   1  34  -1    0.54    3.35
   1  34  -1    0.01    1.68
   1  34  -1   -0.11    6.77
   1 -34  -1   -0.09    4.76
  -1  34  -1    1.96    3.14
  -1  34  -1   -0.41    3.08
   1  34   1    0.16    3.24
   1 -34  -1    1.62    3.01
   1  34   1   -0.37    3.64
   1  35  -1   -0.05    6.04
  -1 -35  -1   -0.13    3.03
   1 -35   1   -0.30    4.47
  -1  35   1   -0.12    4.75
   1  35  -1    8.83    5.29
   1  35   1    0.37    5.83
   1 -35  -1    7.77    4.92
   1 -35  -1   -0.07    4.79
  -1  35  -1    9.94    4.95
  -1  35  -1    1.03    4.97
   1  35   1    0.00    5.20
  -1  36   1    0.01    5.38
   1 -36   1   -0.07    5.09
   1 -36   1   10.15    5.60
   1  36  -1    7.94    6.08
   1  36  -1   -0.09    6.68
   1  36   1    0.09    5.87
   1  36   1    0.38    6.50
  -1  36  -1    0.58    5.60
  -1  36  -1    7.75    5.60
   1 -36  -1    0.12    5.46
   1 -36  -1    6.68    5.58
   1  37  -1   -0.58    5.45
   1 -37   1   -0.13    3.72
   1 -37   1    2.63    5.12
   1  37  -1   -0.21    6.08
  -1  37   1   -0.05    7.25
  -1  37   1    0.18    4.91
   1 -37  -1   -0.18    4.89
   1  37   1   -0.49    5.88
   1  37   1    0.05    5.18
  -1  37  -1    0.49    7.20
  -1  37  -1    2.72    5.16
  -1 -37   1    1.63    2.66
   1 -37  -1   -0.61    4.13
   1 -38   1   -0.16    4.63
   1 -38   1    2.60    6.27
  -1  38   1   -0.14    6.12
  -1  38   1    0.00    8.98
   1  38  -1    0.16    7.56
   1  38  -1    2.97    6.66
  -1  38  -1    3.56    6.29
  -1  38  -1    2.34    6.08
   1  38   1    0.07    6.48
   1 -38  -1   -0.28    6.04
   1 -38  -1    2.79    5.12
   1  38   1   -0.74    7.33
  -1 -38   1    3.09    3.10
   1  39  -1   10.87   16.38
  -1  39   1   17.64   12.68
   1 -39   1   -7.39    9.19
   1 -39   1    6.70    7.63
   1  39  -1   18.24   10.55
  -1  39  -1   11.97    9.01
  -1  39  -1    3.06    9.38
   1  39   1    3.20   10.51
   1  39   1   25.82    9.05
  -1 -39   1    2.54    4.13
   1 -39  -1   12.35    8.37
  -1  40   1    2.09    9.55
   1 -40   1   -6.60    6.68
   1 -40   1    2.80    5.56
   1  40  -1    2.63    7.81
   1  40   1    0.71    7.73
  -1  40  -1   -7.55    6.89
   1 -40  -1   -5.93    6.18
   1 -41   1   -1.10    4.00
   1 -41   1    7.63    3.58
  -1  41   1    2.47    5.76
   1  41  -1   -7.26    4.71
   1  41  -1   -2.45    4.03
  -1  41  -1   -3.12    4.67
  -1  41  -1    0.88    3.91
   1  41   1    2.87    4.96
   1 -41  -1    6.92    4.00
   1 -41  -1   -8.87    4.01
  -1   0   2  854.43   87.87
   1   0  -2  820.49  114.73
  -1   0   2  844.78   79.09
  -1   0   2  947.24  105.67
   1   0  -2  822.92   76.25
  -1   0  -2  812.22   68.49
  -1   0  -2  878.99   85.79
  -1   0   2  875.58  104.59
  -1   0   2  759.35   80.73
  -1   0  -2  877.17   70.44
  -1   0  -2 1088.20   98.48
  -1   0  -2  833.28   72.24
  -1   0  -2  870.76   67.49
  -1   0   2  791.56   65.19
   1   0  -2  864.82   88.58
   1   0  -2  878.26   79.82
   1   1  -2 1753.02  183.84
  -1  -1  -2 1690.57  160.45
  -1  -1  -2 1781.75  182.60
  -1  -1  -2 1836.89  180.91
  -1  -1  -2 1722.97  173.82
   1  -1   2 1589.10  175.84
  -1  -1  -2 1880.38  181.34
  -1  -1  -2 1884.18  185.89
  -1  -1  -2 1757.02  214.53
  -1   1   2 1741.71  197.11
  -1   1   2 1702.47  183.76
   1   1  -2 1854.14  242.93
  -1   1   2 1714.19  171.08
   1   1  -2 1662.41  184.98
   1   1  -2 1750.76  185.75
  -1   1   2 1675.42  213.78
  -1   1   2 1849.65  224.37
   1   1  -2 1683.01  175.96
   1  -1  -2 1696.59  191.88
  -1  -1   2 1820.99  203.10
  -1   1  -2 1699.07  174.01
  -1   1  -2 1572.63  151.26
  -1   1  -2 2092.36  218.13
  -1   1  -2 1774.32  193.32
  -1   1  -2 1813.90  175.05
  -1   1  -2 1712.67  173.46
   1  -1  -2 1841.04  244.70
   1  -1  -2 1692.32  177.51
  -1  -1   2 1776.91  187.51
  -1  -1   2 1682.18  166.42
   1  -1  -2 1694.90  179.72
  -1  -1   2 1731.06  216.34
  -1  -1   2 1425.35  169.15
  -1  -1   2 2040.95  233.82
   1  -1  -2 1631.71  165.07
  -1   2   2 1860.22  198.37
  -1   2   2 1568.75  169.46
  -1   2   2 1795.93  194.63
  -1  -2  -2 1872.44  184.76
  -1  -2  -2 1899.60  205.08
  -1  -2  -2 1916.84  191.96
  -1  -2  -2 1635.23  155.95
   1  -2   2 1485.64  158.81
  -1  -2  -2 1791.87  180.95
   1  -2   2 1623.55  182.35
  -1  -2  -2 2039.42  198.60
  -1  -2  -2 1930.89  199.80
   1   2  -2 1841.71  198.80
   1   2  -2 2034.45  259.75
  -1   2   2 1854.93  209.03
   1   2  -2 1811.55  192.17
  -1   2   2 1851.03  230.75
  -1   2   2 1844.12  185.35
  -1   2   2 2207.55  249.49
  -1   2   2 1828.63  184.88
   1   2  -2 1731.94  193.93
   1   2  -2 1764.98  183.94
  -1  -2   2 1879.75  210.41
  -1   2  -2 2031.03  201.86
  -1   2  -2 1778.85  184.75
  -1  -2   2 1875.16  197.07
  -1   2  -2 1863.23  204.27
  -1   2  -2 1708.06  167.73
   1   2   2 1693.42  174.16
  -1   2  -2 2024.64  212.65
  -1   2  -2 1907.10  183.06
  -1   2  -2 1791.79  184.80
   1  -2  -2 1819.06  190.07
  -1  -2   2 1395.66  170.65
   1  -2  -2 1769.56  189.64
  -1  -2   2 1770.18  220.87
  -1  -2   2 1671.09  167.09
   1  -2  -2 1779.23  201.22
   1  -2  -2 1392.01  165.00
   1  -2  -2 1791.12  206.11
  -1  -2   2 1835.13  228.44
   1  -2  -2 1965.99  257.53
   1  -2  -2 1735.46  178.58
   1  -2  -2 1801.60  183.60
   1   3  -2 3222.96  388.24
  -1   3   2 2791.36  340.92
   1   3  -2 2575.29  311.93
  -1   3   2 2471.03  336.20
  -1  -3  -2 2580.34  286.05
  -1  -3  -2 2845.04  328.41
  -1  -3  -2 2743.32  326.73
   1   3  -2 2396.79  310.58
  -1  -3  -2 2704.70  294.74
  -1   3   2 2580.46  293.73
   1  -3   2 2147.92  254.78
  -1   3   2 2640.70  315.72
  -1  -3  -2 2897.92  328.37
  -1  -3  -2 2569.54  285.03
   1  -3   2 2267.97  279.11
  -1  -3  -2 2590.92  292.29
   1   3  -2 2623.70  293.44
   1  -3   2 2788.53  316.00
   1   3  -2 2611.00  308.59
  -1   3   2 2542.90  298.08
  -1   3   2 2927.63  366.38
   1   3  -2 2471.11  285.32
   1   3  -2 2629.67  315.37
  -1   3   2 2625.81  309.56
  -1   3   2 2677.69  304.80
   1  -3  -2 3026.82  410.86
   1  -3  -2 2712.77  313.50
  -1  -3   2 3065.02  359.96
   1  -3  -2 2555.43  302.30
   1   3   2 2446.66  282.95
  -1   3  -2 2752.46  298.79
  -1   3  -2 2533.29  295.85
  -1   3  -2 2665.07  309.29
  -1   3  -2 2693.61  315.23
  -1  -3   2 2654.73  324.45
  -1   3  -2 2750.49  330.78
  -1   3  -2 2608.11  295.66
  -1  -3   2 1998.61  263.46
  -1   3  -2 2581.70  289.02
   1  -3  -2 2581.39  315.48
   1  -3  -2 3024.51  369.76
   1  -3  -2 2143.99  266.38
  -1  -3   2 2726.92  337.45
  -1  -3   2 2598.40  311.30
  -1  -3   2 2649.96  349.66
   1  -3  -2 2708.88  310.42
  -1  -3   2 2378.47  267.27
   1  -3  -2 2693.53  310.05
  -1   4   2  684.14   56.48
  -1   4   2  719.73   62.44
   1   4  -2  745.35   57.63
   1   4  -2  855.12   81.13
   1   4  -2  678.87   73.27
   1   4  -2  733.34   69.81
  -1   4   2  810.24   67.01
   1   4  -2  696.87   57.85
  -1   4   2  772.83   62.97
  -1   4   2  611.84  129.04
  -1   4   2  765.52   81.88
  -1  -4  -2  680.28   53.19
  -1  -4  -2  772.46   65.86
  -1  -4  -2  741.45   56.18
   1   4  -2  722.32   64.65
   1  -4   2  617.26   56.11
  -1  -4  -2  755.79   55.52
   1  -4   2  752.94   60.30
   1  -4   2  584.31   59.32
  -1  -4  -2  780.21   70.32
  -1  -4  -2  679.62   49.85
  -1  -4  -2  787.63   64.26
  -1  -4  -2  704.16   50.63
   1   4  -2  758.81   70.33
  -1  -4   2  763.57   88.84
  -1  -4   2  564.69   65.89
  -1  -4   2  803.94   70.82
   1  -4  -2  659.56   62.22
   1  -4  -2  742.26   67.49
  -1  -4   2  819.54   73.57
  -1  -4   2  733.90   71.35
  -1  -4   2  714.98   59.81
   1  -4  -2  748.17   63.61
  -1   4  -2  680.27   59.88
  -1   4  -2  585.26   39.36
  -1   4  -2  717.61   56.76
  -1   4  -2  866.67   76.77
  -1   4  -2  731.17   50.98
   1   4   2  673.38   57.42
  -1   4  -2  695.79   55.27
  -1   4  -2  696.24   65.16
  -1   4  -2  745.96   64.89
   1  -4  -2  834.74   83.96
   1  -4  -2  781.01   63.80
  -1  -4   2  692.05   54.02
   1  -4  -2  751.29   73.46
   1  -4  -2  680.31   65.66
   1   5  -2 1150.53  113.03
  -1   5   2 1232.94  130.43
   1   5  -2 1100.02   97.94
  -1   5   2 1183.59  158.82
   1   5  -2 1146.01  118.98
  -1   5   2 1048.92   91.14
   1   5  -2 1099.29  104.84
  -1  -5  -2 1203.32  114.08
  -1  -5  -2 1056.66   90.39
  -1  -5  -2 1175.51  108.41
  -1  -5  -2 1262.45  101.47
  -1  -5  -2 1224.07  109.74
   1  -5   2 1026.47   91.37
  -1   5   2 1140.81  105.34
   1  -5   2 1083.98   99.56
   1  -5   2  954.82   98.43
   1  -5   2  957.67   92.00
  -1  -5  -2 1081.45   88.49
  -1  -5  -2 1102.71   91.51
  -1  -5  -2 1197.99  101.59
   1   5  -2 1149.90   99.34
  -1   5   2 1175.07  106.34
   1   5  -2 1002.70   96.50
  -1   5   2 1098.66   99.60
   1   5  -2 1200.03  120.79
   1  -5  -2 1102.19   98.18
   1  -5  -2 1143.46  109.62
   1  -5  -2 1083.98   99.11
  -1  -5   2 1064.15   92.45
  -1  -5   2 1193.57  118.39
  -1   5  -2 1187.98   96.98
  -1   5  -2 1108.80  109.03
  -1   5  -2 1154.39  102.34
  -1   5  -2 1335.47  125.63
   1   5   2 1140.68  105.14
   1   5   2 1059.52   98.13
  -1   5  -2 1054.14   99.64
  -1   5  -2 1129.11  106.34
  -1   5  -2 1132.92   88.66
  -1   5  -2 1122.10   99.21
  -1   5  -2  994.66   79.49
   1  -5  -2 1090.42  108.15
  -1  -5   2 1200.19  114.50
  -1  -5   2 1093.88   98.58
   1  -5  -2 1119.22  106.49
   1  -5  -2 1062.46   95.31
  -1  -5   2 1346.50  148.06
   1  -5  -2 1075.66  107.39
   1  -5  -2 1298.32  132.21
  -1  -5   2 1340.58  124.32
   1   6  -2  360.46   31.83
  -1   6   2  383.20   42.66
   1   6  -2  361.08   34.40
   1   6  -2  378.74   37.13
  -1  -6  -2  386.32   22.53
  -1  -6  -2  369.32   24.73
   1  -6   2  377.20   27.69
   1  -6   2  289.47   31.67
  -1  -6  -2  417.14   33.24
  -1  -6  -2  391.34   25.01
  -1  -6  -2  366.69   24.18
   1  -6   2  387.88   31.45
  -1  -6  -2  359.60   30.19
   1  -6   2  322.82   28.64
  -1  -6  -2  381.60   22.37
  -1  -6  -2  421.60   32.03
  -1   6   2  349.80   61.72
  -1   6   2  373.53   29.91
   1   6  -2  363.05   36.24
   1   6  -2  359.65   25.12
  -1   6   2  357.22   24.64
  -1   6   2  379.60   29.86
  -1   6   2  370.66   29.68
   1   6  -2  391.07   34.90
   1   6  -2  329.94   29.45
   1  -6  -2  397.55   30.07
   1  -6  -2  380.06   33.79
  -1  -6   2  353.74   25.23
  -1  -6   2  411.82   35.37
  -1  -6   2  382.62   38.76
  -1  -6   2  473.05   77.45
  -1   6  -2  357.29   33.95
  -1   6  -2  358.77   26.99
  -1   6  -2  358.30   21.74
  -1   6  -2  369.41   32.11
  -1   6  -2  358.73   27.44
  -1   6  -2  399.35   35.40
  -1   6  -2  339.77   29.60
  -1   6  -2  342.05   21.57
   1   6   2  332.66   27.78
   1   6   2  370.24   30.58
   1  -6  -2  377.91   30.43
   1  -6  -2  355.84   34.46
   1  -6  -2  458.19   44.21
   1  -6  -2  381.77   27.28
   1  -6  -2  379.43   35.04
   1  -6  -2  394.21   34.59
  -1  -6   2  365.13   27.15
  -1  -6   2  358.80   33.52
  -1   7   2  392.20   39.19
   1   7  -2  586.76   43.04
   1   7  -2  529.97   46.22
  -1   7   2  583.47   47.60
   1   7  -2  590.72   53.96
   1  -7   2  622.21   47.25
   1  -7   2  610.61   49.81
  -1  -7  -2  563.40   39.21
  -1  -7  -2  604.15   43.32
  -1  -7  -2  641.95   50.75
  -1  -7  -2  577.16   47.95
   1  -7   2  442.22   45.83
  -1  -7  -2  546.87   43.04
   1  -7   2  548.52   46.56
  -1  -7  -2  635.36   51.45
  -1  -7  -2  601.75   39.36
   1   7  -2  489.63   53.83
   1   7  -2  607.46   56.31
  -1   7   2  604.80   62.45
  -1   7   2  541.46   80.66
  -1   7   2  593.15   48.31
   1   7  -2  576.79   42.92
  -1   7   2  579.72   41.42
  -1  -7   2  582.76   43.62
  -1  -7   2  454.89   45.37
  -1  -7   2  608.68   47.17
   1  -7  -2  594.44   53.29
  -1  -7   2  578.98   51.98
   1  -7  -2  622.56   45.33
   1   7   2  585.69   48.55
  -1   7  -2  533.76   37.36
   1   7   2  697.32   50.68
   1   7   2  511.70   52.39
  -1   7  -2  544.49   42.76
  -1   7  -2  550.41   44.21
  -1   7  -2  567.79   51.81
  -1   7  -2  592.72   50.48
  -1   7  -2  543.31   37.29
  -1   7  -2  529.72   45.67
  -1  -7   2  568.62   42.22
  -1  -7   2  567.46   47.85
   1  -7  -2  603.95   49.20
   1  -7  -2  666.96   51.63
   1  -7  -2  636.28   55.17
   1  -7  -2  578.21   52.93
   1  -7  -2  632.14   54.33
   1  -7  -2  607.29   52.43
   1   8  -2  168.83   16.32
   1   8  -2  159.91   17.42
   1   8  -2  187.76   18.21
  -1   8   2  175.91   16.52
   1  -8   2  142.26   18.68
   1   8  -2  174.39   12.69
  -1  -8  -2  181.18   11.39
   1  -8   2  178.08   16.34
  -1  -8  -2  200.82   16.61
  -1  -8  -2  209.66   11.06
   1   8  -2  148.22   15.19
   1  -8   2  188.11   16.78
  -1  -8  -2  188.01   12.55
   1  -8   2  201.11   15.15
  -1  -8  -2  176.68   16.11
  -1  -8  -2  195.14   11.67
  -1  -8  -2  198.16   16.98
  -1   8   2  172.92   10.71
   1   8  -2  166.17   34.07
  -1   8   2  174.78   15.86
  -1   8   2  129.45   15.21
  -1   8   2  162.65   37.09
  -1   8   2  151.90   20.91
   1  -8  -2  196.70   20.02
  -1  -8   2  182.41   17.01
  -1  -8   2  166.70   12.25
  -1  -8   2  178.42   12.50
  -1  -8   2  181.21   18.99
   1  -8  -2  184.47   18.06
  -1   8  -2  169.99   20.11
  -1   8  -2  174.83   18.86
  -1   8  -2  157.58   15.46
  -1   8  -2  165.24   10.80
  -1   8  -2  169.13   14.15
   1   8   2  210.87   15.38
  -1   8  -2  172.07   10.59
   1   8   2  175.80   16.26
   1   8   2  185.83   17.44
  -1   8  -2  180.12   17.26
  -1  -8   2  152.61   18.45
   1  -8  -2  164.29   11.22
   1  -8  -2  188.10   16.68
   1  -8  -2  204.11   19.55
   1  -8  -2  181.95   19.80
   1  -8  -2  215.67   16.76
   1  -8  -2  195.34   18.84
  -1  -8   2  212.02   13.63
  -1  -8   2  197.48   14.46
   1   9  -2 1076.71   99.69
   1   9  -2 1027.14  131.51
   1   9  -2  911.36   86.12
   1   9  -2  994.16   96.56
  -1  -9  -2 1099.26   91.46
   1  -9   2 1083.37   98.79
  -1   9   2  839.34   82.71
  -1  -9  -2 1104.55   93.29
  -1  -9  -2 1077.83   87.86
  -1  -9  -2 1070.39   97.65
   1  -9   2  904.65   78.24
  -1  -9  -2 1119.72  100.75
  -1  -9  -2 1158.47   92.12
   1  -9   2 1212.65  125.17
   1  -9   2  900.95   92.55
  -1  -9  -2 1120.61  100.94
  -1   9   2  952.44  128.01
  -1   9   2 1007.00   82.82
  -1   9   2 1025.19   94.31
   1   9  -2 1074.44   93.25
  -1   9   2  936.93   98.88
  -1   9   2 1084.11  100.39
   1   9  -2 1146.29  106.63
  -1  -9   2 1141.30  107.59
  -1  -9   2 1007.54   99.47
  -1  -9   2 1155.74   96.94
  -1  -9   2  993.65   85.90
   1   9   2 1079.70  100.50
  -1   9  -2 1007.25  102.42
  -1   9  -2  995.84   83.70
  -1   9  -2 1070.05  100.43
  -1   9  -2  995.58   89.79
   1   9   2 1017.35   95.34
  -1   9  -2 1004.28   83.55
   1   9   2 1163.07  100.82
   1  -9  -2  998.94   83.26
   1  -9  -2 1210.39  113.79
  -1  -9   2 1146.98  104.77
  -1  -9   2 1030.03   87.24
   1  -9  -2  973.71   85.26
   1  -9  -2 1102.97  102.86
   1  -9  -2 1142.45  105.98
   1  -9  -2 1079.62   99.18
   1  -9  -2 1223.03  112.72
  -1  -9   2 1229.08  104.96
   1  -9  -2 1103.40  106.27
   1  10  -2  250.69   21.09
   1  10  -2  199.11   17.42
  -1  10   2  226.48   20.22
   1  10  -2  217.62   21.77
   1  10  -2  222.42   40.78
   1  10  -2  201.41   19.27
  -1  10   2  196.43   40.16
  -1  10   2  229.40   21.36
   1 -10   2  253.40   21.02
   1 -10   2  279.67   23.68
  -1 -10  -2  257.70   16.67
   1 -10   2  230.65   16.39
  -1 -10  -2  241.05   20.48
  -1 -10  -2  262.87   21.57
  -1 -10  -2  275.82   15.53
  -1 -10  -2  258.07   15.05
  -1 -10  -2  265.46   21.44
  -1 -10  -2  270.35   17.97
   1 -10   2  203.27   23.32
  -1  10   2  218.67   13.63
  -1  10   2  206.28   25.70
  -1  10   2  190.75   19.32
   1  10  -2  228.63   16.85
  -1 -10   2  269.75   22.60
  -1 -10   2  239.26   15.53
  -1 -10   2  248.94   16.71
  -1 -10   2  253.96   23.74
   1 -10  -2  245.78   15.23
  -1  10  -2  230.35   21.53
  -1  10  -2  231.90   21.23
  -1  10  -2  223.84   15.51
   1  10   2  244.12   19.14
  -1  10  -2  225.27   18.97
  -1  10  -2  228.47   14.93
  -1  10  -2  251.02   23.83
   1  10   2  215.58   19.98
   1  10   2  230.15   21.20
  -1  10  -2  222.47   18.81
   1 -10  -2  264.64   22.95
   1 -10  -2  298.38   26.51
  -1 -10   2  226.85   16.31
   1 -10  -2  249.16   24.47
   1 -10  -2  241.90   17.99
  -1 -10   2  244.54   24.47
   1 -10  -2  249.27   21.61
  -1 -10   2  285.07   18.38
   1 -10  -2  245.27   22.27
   1  11  -2  522.96   48.92
   1  11  -2  498.78   42.82
   1  11  -2  501.22   44.60
   1  11  -2  579.67   43.58
   1  11  -2  543.57   42.91
   1  11  -2  515.36   72.75
  -1  11   2  477.63   43.62
  -1  11   2  544.34   48.85
   1 -11   2  632.59   51.34
  -1 -11  -2  628.44   51.20
  -1 -11  -2  609.01   41.65
  -1 -11  -2  630.48   45.93
   1 -11   2  668.55   55.98
   1 -11   2  602.04   45.18
  -1 -11  -2  588.34   49.08
  -1 -11  -2  644.41   52.19
  -1 -11  -2  614.33   41.79
  -1 -11  -2  655.80   44.50
  -1  11   2  481.18   51.62
  -1  11   2  523.51   36.94
  -1  11   2  489.35   71.78
   1  11  -2  612.38   58.36
   1 -11  -2  590.93   53.67
  -1 -11   2  623.25   45.21
   1 -11  -2  654.84   54.47
  -1 -11   2  641.40   57.76
  -1 -11   2  599.36   42.75
  -1  11  -2  529.77   45.51
  -1  11  -2  541.02   48.10
   1  11   2  504.28   45.14
  -1  11  -2  538.71   47.93
  -1  11  -2  553.39   42.79
   1  11   2  525.63   40.25
   1  11   2  523.20   46.46
  -1  11  -2  548.33   40.72
  -1  11  -2  537.65   45.47
   1  11   2  560.54   45.85
  -1  11  -2  502.22   46.25
   1 -11  -2  639.07   44.32
   1 -11  -2  600.52   51.73
   1 -11  -2  632.85   48.62
  -1 -11   2  688.32   56.36
   1 -11  -2  615.79   50.47
   1 -11  -2  598.73   51.20
  -1 -11   2  619.58   54.73
   1 -11  -2  749.22   63.07
  -1 -11   2  562.15   43.14
   1  12  -2    9.39    2.89
   1  12  -2    9.54    4.67
   1  12  -2    8.89    4.12
   1  12  -2   12.27    2.75
  -1 -12  -2   10.72    3.99
   1 -12   2   11.96    2.95
  -1 -12  -2   16.98    1.87
   1 -12   2   11.38    3.88
  -1 -12  -2   10.09    1.51
   1  12  -2    7.70    2.42
   1 -12   2   12.77    4.79
  -1 -12  -2    9.71    2.37
  -1 -12  -2   10.69    7.96
  -1 -12  -2   18.55    4.10
  -1 -12  -2    9.85    1.47
  -1  12   2    7.26    6.08
  -1  12   2   11.19    1.66
   1  12  -2    7.52    3.31
  -1  12   2    8.46    4.05
  -1  12   2    6.89   10.77
  -1  12   2    9.77    4.59
   1  12  -2   12.60    9.69
   1  12  -2    5.47    2.09
  -1 -12   2   11.76    4.99
  -1 -12   2   11.50    1.95
  -1 -12   2    1.50    5.20
  -1 -12   2   10.58    8.08
  -1 -12   2   10.89    2.20
  -1  12  -2    8.26    2.60
  -1  12  -2   11.50    4.29
   1  12   2   12.01    2.71
  -1  12  -2    7.93    3.81
  -1  12  -2    7.71    4.42
   1  12   2    8.43    3.83
   1  12   2    9.87    3.85
  -1  12  -2    9.06    2.17
  -1  12  -2    9.22    3.54
  -1  12  -2    9.16    3.97
   1  12   2    9.26    3.62
   1 -12  -2   15.65    5.38
   1 -12  -2    9.12    1.68
   1 -12  -2   11.98    3.41
   1 -12  -2   10.87    4.24
  -1 -12   2   11.25    2.71
  -1 -12   2   12.96    5.43
   1 -12  -2    8.39    4.29
   1 -12  -2   10.30    5.29
   1 -12  -2   10.54    4.06
   1 -12  -2   11.40    4.52
   1  13  -2  998.30   84.17
   1  13  -2  835.97  107.26
   1  13  -2  822.15   75.35
   1  13  -2  874.17   76.62
  -1 -13  -2 1008.28   77.82
  -1 -13  -2 1000.88   90.09
  -1 -13  -2 1050.79   86.53
  -1 -13  -2 1275.37  114.39
  -1 -13  -2 1030.04   81.70
  -1 -13  -2 1046.93   91.68
   1 -13   2 1048.55   95.55
   1 -13   2 1024.69   90.49
   1 -13   2 1027.73   86.54
  -1 -13  -2  980.42   76.38
  -1  13   2  907.25   72.73
  -1  13   2  803.26   86.20
  -1  13   2  712.38   76.06
  -1  13   2  865.58   83.61
  -1  13   2  771.61  104.61
   1  13  -2  754.18   65.78
   1  13  -2  845.39   78.37
   1  13  -2  854.65   83.82
  -1 -13   2 1065.61   98.86
  -1 -13   2 1190.61  109.60
  -1 -13   2 1171.15   93.39
   1 -13  -2  952.75   87.83
   1 -13  -2  950.19   88.01
   1 -13  -2  989.12   94.01
   1 -13  -2  941.73   74.27
  -1  13  -2  883.23   74.85
   1  13   2  890.35   76.56
  -1  13  -2  821.50   80.48
   1  13   2  859.44   78.32
  -1  13  -2  867.41   81.33
  -1  13  -2  864.56   81.34
  -1  13  -2  881.06   76.81
  -1  13  -2  898.64   85.51
   1  13   2  763.86   73.53
   1  13   2  823.45   77.90
  -1  13  -2  825.29   76.67
   1 -13  -2 1029.83   91.24
  -1 -13   2  938.55   83.20
   1 -13  -2 1096.38   93.30
  -1 -13   2  993.82   79.33
  -1 -13   2 1004.34   85.00
  -1  14   2  683.98   74.90
   1  14  -2  620.97   51.79
   1  14  -2  703.18   63.13
  -1 -14  -2  898.06   67.64
  -1 -14  -2  868.49   73.79
  -1 -14  -2  835.95   73.07
   1 -14   2  838.91   67.76
  -1 -14  -2 1081.31   94.73
  -1 -14  -2  795.43   58.71
  -1 -14  -2  823.87   59.47
   1 -14   2  861.82   73.53
   1 -14   2  879.25   83.87
   1 -14   2  856.22   76.77
   1  14  -2  788.16   65.73
  -1  14   2  726.08   69.74
  -1  14   2  744.51   56.93
  -1  14   2  615.22   53.96
  -1  14   2  632.80   89.34
   1  14  -2  707.10   91.03
   1  14  -2  712.39   69.27
   1  14  -2  717.09   68.78
   1  14  -2  726.18   65.48
  -1 -14   2  844.78   71.66
   1 -14  -2 1052.74   92.14
  -1 -14   2  569.89   48.26
  -1 -14   2 1036.94   91.70
  -1 -14   2  835.58   67.12
   1  14   2  680.93   61.93
   1  14   2  679.16   62.38
  -1  14  -2  716.68   65.64
  -1  14  -2  691.24   63.10
   1 -14  -2  918.60   78.11
  -1  14  -2  702.91   65.66
   1  14   2  710.88   59.97
  -1  14  -2  677.23   66.94
  -1  14  -2  715.05   61.07
  -1  14  -2  744.33   69.54
   1  14   2  627.11   59.40
  -1  14  -2  727.03   59.97
   1 -14  -2  942.69   77.54
   1 -14  -2  848.47   78.57
   1 -14  -2  796.97   72.41
   1 -14  -2  787.17   70.95
   1 -14  -2  802.10   59.64
  -1 -14   2  849.64   69.24
   1 -14  -2  833.81   71.62
  -1 -14   2  907.04   82.07
   1  15  -2  627.46   59.76
   1  15  -2  683.54   61.74
   1  15  -2  698.49   91.06
   1  15  -2  621.42   51.66
  -1  15   2  652.78   92.16
   1  15  -2  727.79   65.28
   1 -15   2  944.04  107.51
   1 -15   2  823.71   67.22
   1 -15   2  977.23   87.26
   1 -15   2  852.16   73.10
  -1 -15  -2 1057.56   93.27
  -1 -15  -2  885.19   67.39
  -1 -15  -2  831.41   73.45
   1 -15   2  865.70   77.49
  -1 -15  -2  880.55   62.97
  -1 -15  -2  855.73   73.37
  -1 -15  -2  834.38   60.97
  -1  15   2  671.13   74.41
  -1  15   2  724.35   70.62
   1  15  -2  704.00   68.58
  -1  15   2  729.42   55.96
  -1  15   2  605.19   52.71
   1  15  -2  754.55   63.88
  -1 -15   2  867.58   73.52
  -1 -15   2  805.77   82.80
  -1 -15   2  783.83   63.36
  -1 -15   2  929.09   83.51
  -1 -15   2  838.79   67.40
   1 -15  -2  838.69   77.84
  -1  15  -2  736.78   69.26
  -1  15  -2  675.13   62.68
  -1  15  -2  705.62   66.81
   1  15   2  665.89   57.44
  -1  15  -2  703.58   64.56
   1 -15  -2  816.99   69.82
  -1  15  -2  677.93   66.28
   1  15   2  620.17   58.38
  -1  15  -2  682.37   59.57
   1  15   2  683.79   62.77
  -1  15  -2  708.84   59.03
   1 -15  -2  849.78   63.24
   1 -15  -2  940.72   77.57
   1  15   2  654.72   61.51
   1 -15  -2  790.00   72.86
   1 -15  -2  795.68   71.89
   1 -15  -2 1026.15   91.13
  -1 -15   2  868.78   71.40
   1 -15  -2  929.59   79.44
   1  16  -2   31.15    7.08
   1  16  -2   28.18    3.16
   1  16  -2   31.28    5.70
   1  16  -2   33.58    5.13
  -1  16   2   41.54    3.25
  -1  16   2   30.24   16.39
   1 -16   2   39.61    5.66
  -1 -16  -2   38.32    2.14
   1  16  -2   30.44    5.66
   1 -16   2   39.90    7.45
  -1 -16  -2   38.69    3.49
  -1 -16  -2   34.86    2.28
  -1 -16  -2   48.20    8.55
  -1 -16  -2   38.32    6.06
  -1 -16  -2   37.58    6.45
   1 -16   2   43.63    8.37
  -1  16   2   30.70    5.87
  -1  16   2   28.83    4.17
  -1  16   2   34.56    7.94
  -1  16   2   29.45    9.89
   1  16  -2   31.16   13.94
  -1 -16   2   43.08    7.79
  -1 -16   2   40.91    6.20
  -1 -16   2   35.50    6.25
  -1 -16   2   47.75    5.25
  -1  16  -2   32.21    6.25
  -1  16  -2   31.33    6.84
   1  16   2   27.14    5.37
  -1  16  -2   28.61    6.12
  -1  16  -2   27.47    4.84
   1  16   2   27.54    6.42
   1  16   2   27.91    4.70
  -1  16  -2   31.41    6.83
   1  16   2   28.72    9.17
  -1  16  -2   30.54    4.05
   1 -16  -2   27.24    5.67
  -1 -16   2   34.38    4.10
   1 -16  -2   34.62    7.22
   1 -16  -2   39.71    8.16
   1 -16  -2   40.09    4.67
   1 -16  -2   37.02    6.46
   1 -16  -2   45.76    8.43
  -1 -16   2   35.33    4.14
   1 -16  -2   42.45    6.95
   1 -16  -2   37.07    5.41
   1  17  -2   73.40    8.26
   1  17  -2   61.60    9.56
  -1 -17  -2   74.24    8.80
   1 -17   2   92.68   11.81
  -1 -17  -2   79.77    5.72
  -1  17   2   56.44   20.89
  -1 -17  -2   79.65    8.66
  -1 -17  -2   93.84   11.79
   1 -17   2   72.87    7.79
   1 -17   2   77.91   10.13
  -1  17   2   69.41    4.85
  -1  17   2   65.35   11.15
  -1  17   2   59.64   13.61
  -1  17   2   58.57    5.84
  -1  17   2   62.38    8.26
   1  17  -2   64.76   12.43
   1  17  -2   58.73    4.71
   1  17  -2   59.05   18.15
   1  17  -2   62.43    7.20
  -1 -17   2   84.13    8.77
  -1 -17   2   88.51   10.90
  -1 -17   2   90.76    8.01
  -1 -17   2   66.84    5.70
   1  17   2   52.48    7.25
  -1  17  -2   57.22    8.64
   1  17   2   56.27    8.93
   1  17   2   55.00    6.68
   1  17   2   84.01   10.26
  -1  17  -2   62.30    5.55
  -1  17  -2   62.36    9.29
  -1  17  -2   64.49    9.80
  -1  17  -2   60.76    6.01
  -1  17  -2   57.88    7.25
  -1  17  -2   62.36    8.35
   1 -17  -2   79.48    5.04
   1 -17  -2   76.21    7.48
  -1 -17   2   70.15    6.30
   1 -17  -2   68.53   10.05
   1 -17  -2   90.62    9.60
   1 -17  -2   73.20    9.04
  -1 -17   2   74.24    8.73
   1 -17  -2   93.20   11.79
   1 -17  -2   79.83   11.26
   1  18  -2   61.06    7.77
   1  18  -2   60.43    9.16
   1  18  -2   56.11   17.14
   1  18  -2   54.60    4.38
   1 -18   2   73.45    7.56
   1 -18   2   89.10   11.92
  -1 -18  -2   73.64    5.58
  -1 -18  -2   90.10   11.17
  -1 -18  -2   87.36    8.56
  -1 -18  -2   78.33    8.51
  -1 -18  -2   72.48    8.66
   1 -18   2   74.07    9.65
  -1  18   2   56.46    5.56
  -1  18   2   63.30   11.06
  -1  18   2   58.48   13.47
  -1  18   2   58.02   21.13
  -1  18   2   61.80    8.26
   1  18  -2   62.77    7.77
   1  18  -2   56.94    6.93
  -1 -18   2   79.87    7.43
   1 -18  -2   85.66    9.27
  -1 -18   2   83.28   10.17
  -1 -18   2   68.97    6.27
  -1  18  -2   59.76    8.88
  -1  18  -2   59.82    5.33
  -1  18  -2   55.31    7.35
  -1  18  -2   56.13   12.08
   1  18   2   53.02    8.85
   1  18   2   71.86    9.47
  -1  18  -2   58.67    9.59
  -1  18  -2   60.76    6.30
   1  18   2   53.19    6.60
   1  18   2   53.68    6.88
  -1  18  -2   55.65    8.48
   1 -18  -2   71.07    8.77
   1 -18  -2   92.54   11.92
   1 -18  -2   68.89   10.27
   1 -18  -2   78.40    7.37
   1 -18  -2   77.24   10.89
  -1 -18   2   80.45    8.67
  -1 -18   2   73.45    8.54
   1  19  -2   31.28    5.68
   1  19  -2   30.53    5.51
  -1 -19  -2   36.24    6.02
  -1 -19  -2   45.80    5.96
   1 -19   2   44.09    8.85
   1 -19   2   35.75    7.05
   1 -19   2   53.72   16.53
   1 -19   2   39.47    7.01
  -1 -19  -2   46.99    8.09
  -1 -19  -2   42.74    6.06
  -1 -19  -2   35.59    3.66
   1 -19   2   37.15    5.12
  -1  19   2   31.67   16.17
  -1  19   2   29.91    3.80
  -1  19   2   30.87    6.05
   1  19  -2   32.15    6.88
  -1  19   2   32.06   10.64
   1  19  -2   25.05   12.80
  -1  19   2   39.92    8.71
  -1 -19   2   36.41    4.33
  -1 -19   2   44.22    6.35
  -1 -19   2   40.76    5.02
  -1 -19   2   39.44    5.91
  -1  19  -2   28.68    6.16
  -1  19  -2   27.24    5.29
  -1  19  -2   30.45    4.35
   1  19   2   25.79    4.76
   1  19   2   26.77    6.59
  -1  19  -2   35.95    7.43
  -1  19  -2   31.96    6.52
  -1  19  -2   34.15    5.81
   1  19   2   25.16    4.97
   1 -19  -2   40.11    5.05
   1  19   2   35.86    6.22
  -1  19  -2   29.37    3.66
   1 -19  -2   44.45   10.98
   1 -19  -2   38.32    7.70
   1 -19  -2   36.00    6.13
   1 -19  -2   50.46    8.83
   1 -19  -2   40.12    8.00
  -1 -19   2   42.36    7.27
   1  20  -2   29.83    6.72
   1  20  -2   24.35    4.24
  -1  20   2   24.37    5.87
  -1  20   2   33.35    8.85
   1  20  -2   29.36    5.42
   1 -20   2   34.31    7.27
  -1 -20  -2   41.46    5.80
  -1 -20  -2   38.45    5.75
   1 -20   2   43.03    8.93
   1 -20   2   33.96    4.93
   1 -20   2   41.30    8.97
  -1 -20  -2   42.86    7.83
   1 -20   2   33.91    6.63
  -1 -20  -2   30.28    5.83
  -1 -20  -2   32.96    3.56
  -1  20   2   22.14   16.19
  -1  20   2   28.07   10.46
  -1  20   2   27.54    3.72
   1  20  -2   28.45    5.41
  -1 -20   2   30.07    4.03
  -1 -20   2   34.79    4.76
   1 -20  -2   34.96    7.62
   1 -20  -2   37.82    4.75
  -1  20  -2   25.81    6.26
  -1  20  -2   30.37    5.54
  -1  20  -2   30.60    6.52
  -1  20  -2   31.98    7.56
  -1  20  -2   26.02    3.64
  -1  20  -2   24.73    5.46
   1  20   2   24.87    4.52
   1  20   2   21.56    6.52
   1  20   2   30.90    5.96
  -1  20  -2   28.39    4.24
   1 -20  -2   31.89    6.01
   1 -20  -2   35.66    7.81
   1 -20  -2   42.26    6.37
   1 -20  -2   41.41    8.62
  -1 -20   2   38.63    7.20
  -1 -20   2   41.40    6.38
  -1 -20   2   36.83    5.60
   1  21  -2    6.63    3.01
   1  21  -2    6.75    3.03
   1 -21   2    7.41    5.41
   1 -21   2    5.66    3.84
  -1 -21  -2    6.75    3.30
  -1 -21  -2    5.60    3.09
  -1 -21  -2    6.00    3.63
  -1 -21  -2    7.47    2.46
   1  21  -2    6.29    4.54
   1 -21   2    7.71    5.43
  -1 -21  -2    7.46    4.35
  -1 -21  -2    9.08    3.18
   1 -21   2    5.96    4.14
   1 -21   2    6.91    2.66
  -1  21   2    2.29    3.33
  -1  21   2    7.16    5.41
  -1  21   2    1.33   10.00
  -1  21   2    5.12    6.34
  -1  21   2    6.08    2.03
   1  21  -2    5.25    3.97
   1  21  -2    4.05    2.49
  -1 -21   2    5.27    2.47
  -1 -21   2    5.84    3.01
  -1  21  -2    5.29    2.32
  -1  21  -2    5.01    3.67
  -1  21  -2    7.81    3.22
  -1  21  -2    4.75    3.70
   1  21   2    6.16    4.58
   1  21   2    5.37    3.18
  -1  21  -2    5.77    4.67
  -1  21  -2    3.84    3.05
  -1  21  -2    4.20    2.04
   1  21   2    4.52    3.99
   1  21   2    3.74    5.09
   1 -21  -2    5.95    3.25
   1 -21  -2    5.72    4.58
   1 -21  -2    6.66    4.45
   1 -21  -2    7.30    3.71
   1 -21  -2    8.37    5.21
   1 -21  -2    8.37    2.43
  -1 -21   2    5.81    4.09
  -1 -21   2    5.97    2.09
   1  22  -2   60.88    8.54
  -1 -22  -2  100.59   12.80
  -1 -22  -2   87.24    9.38
  -1 -22  -2   76.75    9.67
   1 -22   2   74.52   11.04
  -1 -22  -2   94.02    9.90
   1 -22   2   75.60    8.12
  -1 -22  -2   86.04    7.55
  -1 -22  -2   79.31    8.08
   1  22  -2   69.72   11.79
  -1  22   2   68.37   13.27
  -1  22   2   61.98   15.76
  -1  22   2   55.22   24.10
  -1  22   2   68.08    6.14
   1  22  -2   67.23    8.51
   1  22   2   59.18    8.51
  -1  22  -2   68.22   12.64
   1  22   2   48.29   10.17
  -1  22  -2   57.71   14.11
  -1  22  -2   69.24   19.20
  -1  22  -2   56.15    7.35
  -1  22  -2   64.43    9.72
   1  22   2   69.66    8.43
   1  22   2   58.56   11.23
  -1  22  -2   66.52    8.37
   1 -22  -2   80.75   11.79
   1 -22  -2   75.19   11.84
   1 -22  -2   77.29    9.75
   1 -22  -2   89.21   11.75
  -1 -22   2   81.53    8.52
  -1 -22   2   95.05   12.51
  -1 -22   2   73.37    7.25
  -1 -22   2   87.45    9.31
   1  23  -2    7.48    3.37
   1  23  -2    5.12    3.12
   1 -23   2    8.54    4.42
  -1 -23  -2    8.31    2.75
  -1 -23  -2    8.67    3.30
  -1 -23  -2    8.14    3.49
   1 -23   2    6.98    2.70
  -1 -23  -2    7.31    2.38
  -1 -23  -2    0.97    4.77
  -1  23   2   -0.50   10.68
   1  23  -2    8.12    5.08
  -1  23   2    6.79    2.01
  -1  23   2    6.56    7.05
  -1  23   2    7.56    5.91
  -1 -23   2    6.52    2.92
  -1  23  -2    6.38    4.74
  -1  23  -2    6.88    5.43
  -1  23  -2    8.04    4.85
   1  23   2    6.89    5.04
  -1  23  -2    5.51    3.80
  -1  23  -2    5.99    3.08
   1  23   2    4.80    4.34
  -1 -23   2    5.79    2.51
   1 -23  -2    8.66    2.41
   1 -23  -2    5.79    3.29
   1 -23  -2    6.48    4.87
   1 -23  -2    7.46    4.81
  -1 -23   2   10.25    3.09
   1  24  -2   33.12    9.13
   1  24  -2   28.62    6.02
  -1 -24  -2   38.19    7.05
  -1 -24  -2   43.55    6.55
   1 -24   2   39.63    8.37
  -1 -24  -2   40.47    5.05
  -1 -24  -2   38.83    5.56
  -1  24   2   39.62   20.14
  -1  24   2   35.53   10.88
   1  24  -2   35.02    8.47
  -1  24   2   29.91   12.56
   1  24  -2   36.23    6.01
  -1 -24   2   44.82    6.33
   1 -24  -2   36.90    8.92
   1 -24  -2   31.94   10.46
  -1  24  -2   36.19    8.84
  -1  24  -2   33.10    7.01
  -1  24  -2   30.99    5.54
   1  24   2   30.16    9.19
   1  24   2   25.73    8.14
  -1 -24   2   42.65    8.62
  -1  24  -2   33.32    8.88
  -1  24  -2   35.44    9.98
   1 -24  -2   41.84    8.91
   1  25  -2   15.17    4.52
  -1 -25  -2   20.32    4.70
  -1 -25  -2   20.03    4.22
   1 -25   2   22.44    6.50
  -1 -25  -2   20.57    5.47
   1  25  -2   18.98    4.52
  -1  25   2   17.71    9.97
  -1  25   2   15.61    8.87
   1  25  -2   18.24    6.70
   1  25  -2   17.74    7.41
  -1  25  -2   18.84    8.16
  -1  25  -2   17.56    5.26
  -1  25  -2   19.05    7.23
   1  25   2   15.61    6.63
  -1  25  -2   25.27    7.35
  -1  25  -2   19.61    4.43
   1  25   2   13.59    7.46
   1 -25  -2   19.23    4.81
   1 -25  -2   20.43    7.18
   1 -25  -2   24.18    7.00
  -1 -25   2   19.98    4.06
  -1 -25   2   20.31    6.37
   1  26  -2   31.87    8.63
  -1 -26  -2   36.42    7.10
   1 -26   2   35.49    7.92
  -1 -26  -2   33.28    5.79
  -1  26   2   32.91   10.96
  -1  26   2   25.77   12.46
  -1  26   2   16.22   11.80
   1  26  -2   35.33    5.83
  -1 -26   2   35.11    5.39
   1 -26  -2   34.25    8.94
  -1  26  -2   38.21    9.04
  -1  26  -2   32.36    8.85
  -1  26  -2   33.21   12.59
  -1  26  -2   38.12   10.43
   1  26   2   21.76    8.42
  -1  26  -2   29.44    5.27
   1 -26  -2   29.77    5.71
  -1 -26   2   34.81    5.25
   1 -26  -2   36.96    8.54
   1  27  -2    4.39    4.85
   1  27  -2    4.30    6.52
  -1 -27  -2    6.54    3.87
   1 -27   2    5.37    4.45
  -1 -27  -2    5.30    2.80
   1  27  -2    5.49    2.95
  -1  27   2    5.56    7.39
  -1  27   2    4.64    6.41
  -1 -27   2    5.97    2.55
  -1  27  -2    5.39    5.99
  -1  27  -2    7.45    5.05
  -1  27  -2    5.51    3.76
  -1  27  -2   29.49    5.75
   1  27   2    7.05   11.65
   1 -27  -2    5.37    4.87
   1 -27  -2    6.54    5.06
  -1 -27   2    3.95    2.66
   1  28  -2   17.26    4.13
  -1  28   2   15.14   10.73
  -1 -28  -2   19.67    5.56
   1 -28   2   20.10    6.25
  -1 -28  -2   16.97    4.33
   1  28  -2   18.74    8.16
  -1  28   2   20.49    9.10
   1  28  -2   16.11    6.96
   1  28  -2   16.68    5.37
  -1 -28   2   22.09    4.10
  -1  28  -2   17.67   13.72
  -1  28  -2   23.89    7.89
  -1  28  -2   17.63    5.21
   1  28   2   11.52   15.09
   1  28   2   12.71    8.00
   1  28   2   19.06    9.47
  -1  28  -2   17.13    7.39
   1 -28  -2   22.39    7.43
   1 -28  -2   22.03    7.37
  -1  29   2   45.64   19.67
   1  29  -2   40.91    7.63
  -1 -29  -2   48.18    8.14
  -1 -29  -2   40.42    6.25
   1 -29   2   47.34    8.93
   1  29  -2   40.00   17.42
   1  29  -2   36.27    9.79
  -1  29   2   40.32   14.43
   1  29  -2   42.72    5.88
  -1  29  -2   41.50   10.19
  -1  29  -2   44.87    7.45
   1  29   2   39.86   13.21
   1  29   2   39.13   10.92
  -1  29  -2   48.56   10.34
  -1  29  -2   54.56   10.98
   1  29   2   17.13   18.42
   1 -29  -2   52.97   10.43
   1 -29  -2   55.96   10.81
  -1 -29   2   44.89    5.81
  -1 -30  -2    6.52    3.51
  -1 -30  -2    4.35    2.55
   1 -30   2    5.20    7.37
  -1  30   2    5.05    5.27
   1  30  -2    5.01    4.60
   1  30  -2    7.29    5.42
   1  30  -2    6.23    3.50
  -1  30  -2    6.38    4.71
   1  30   2    6.66    6.09
   1  30   2    4.01    8.66
  -1  30  -2    7.68    4.83
   1  30   2    6.27   10.17
  -1  30  -2    5.45    3.46
  -1  30  -2    6.51    4.88
   1 -30  -2    7.79    8.16
   1 -30  -2    7.68    4.85
  -1 -30   2    6.13    2.28
   1 -31   2   38.49    8.26
  -1 -31  -2   35.98    7.06
  -1  31   2   38.90    9.55
   1  31  -2   29.33    8.73
   1  31  -2   31.03    6.79
   1  31  -2   43.57   10.33
   1 -31  -2   41.01    9.76
   1  31   2   39.86   10.35
  -1  31  -2   29.14    8.89
  -1  31  -2   41.55    9.42
  -1  31  -2   32.10    8.87
   1  31   2   33.07   11.40
  -1  31  -2   29.36    6.21
   1 -31  -2   44.08    9.88
   1  32  -2   16.15    5.18
   1 -32   2   23.15    7.27
  -1 -32  -2   29.29    6.12
  -1  32   2   22.31    7.85
   1  32  -2   17.19    7.27
   1  32  -2   26.10    8.56
   1  32   2    0.21    9.31
  -1  32  -2   21.38    7.71
  -1  32  -2   19.51    7.67
  -1  32  -2   18.02    7.34
  -1  32  -2   15.21    4.43
   1  32   2   22.86    8.55
   1 -32  -2   25.30    8.04
   1 -32  -2   26.78    7.92
  -1 -33  -2   -0.86    3.09
   1 -33   2   -0.34    3.76
  -1  33   2   -0.18    3.88
   1  33  -2   10.58    4.50
   1  33  -2   -0.09    2.72
   1  33  -2    0.08    3.89
   1 -33  -2    0.07    4.29
   1 -33  -2   10.35    4.25
  -1  33  -2   -0.25    3.96
   1  33   2   -0.21    4.33
  -1  33  -2    8.94    4.04
   1  33   2    0.54    4.70
  -1  33  -2   -0.24    3.95
   1  34  -2   -0.05    4.06
  -1  34   2   -0.11    4.10
  -1 -34  -2   -0.29    3.17
   1 -34   2   -0.12    4.01
   1  34  -2   10.42    4.66
  -1  34   2   -0.14    6.31
   1  34  -2   -0.14    2.72
  -1  34  -2    7.37    4.38
   1  34   2    0.00    4.50
  -1  34  -2   -0.51    4.01
  -1  34  -2   -0.36    4.12
   1  34   2    1.01    5.21
   1 -34  -2    0.18    4.55
   1 -34  -2    8.79    4.41
   1  35  -2   -0.04    2.14
   1  35  -2    3.47    3.96
   1 -35   2   -0.11    3.34
  -1 -35  -2   -0.17    2.45
  -1  35   2    0.05    5.45
  -1  35   2   -0.04    3.51
   1  35  -2   -0.08    4.34
  -1  35  -2   -0.43    3.45
   1  35   2    0.21    4.29
   1  35   2    0.13    3.80
  -1  35  -2    3.17    3.63
   1 -35  -2    0.00    3.89
   1 -35  -2    2.76    3.59
   1  36  -2   10.84    5.16
  -1  36   2   -0.16    8.75
   1  36  -2   -0.08    2.89
   1 -36   2   -0.03    4.63
  -1 -36  -2   -0.29    3.30
  -1  36   2   -0.28    4.96
   1  36  -2    0.08    7.02
  -1  36  -2   10.35    5.01
   1  36   2    0.13    5.92
  -1  36  -2   -0.67    4.62
   1  36   2    0.09    5.21
   1 -36  -2    8.77    4.91
   1 -36  -2    0.07    6.42
   1 -37   2    0.54    6.79
   1 -37   2   -0.05    4.77
  -1  37   2   -0.16    5.16
  -1  37   2    0.09    9.37
   1  37  -2   -0.16    7.22
   1  37  -2    7.52    5.34
   1 -37  -2    7.42    5.04
  -1  37  -2    0.18    5.84
   1  37   2   -0.03    5.38
   1  37   2    0.11    6.34
  -1  37  -2    4.99    5.16
   1 -37  -2   -0.36    6.71
   1 -38   2   13.01    9.60
   1 -38   2    6.47    6.55
  -1  38   2   -0.01    6.77
   1  38  -2   14.71   12.18
   1  38  -2   17.98    8.35
   1 -38  -2   14.79   12.36
  -1 -38   2    4.54    4.96
   1 -38  -2   -0.33    8.87
   1  38   2   -0.14    6.97
  -1  38  -2    0.36    7.01
  -1  38  -2   14.79    6.87
   1  38   2    0.59    8.25
   1  39  -2    5.49    8.14
   1 -39   2    1.18    5.74
   1 -39   2   15.69    8.12
  -1 -39   2    3.78    4.30
   1  39   2    1.26    8.04
  -1  39  -2   -3.34    6.54
   1 -39  -2   10.88    7.92
   1 -39  -2    3.13    6.62
   1  40  -2    3.68    7.43
   1 -40   2   15.71    7.50
   1 -40   2   -1.84    5.96
   1  40  -2    5.34    6.37
  -1  40  -2    1.18    5.85
   1  40   2    5.16    9.19
  -1  40  -2    6.52    5.25
   1 -40  -2  -12.54    7.14
   1 -40  -2    0.54    6.45
   1  41  -2    2.22    9.75
  -1  41   2    8.94   19.06
   1 -41   2   24.44    8.71
   1 -41   2   12.84   11.68
  -1  41   2   39.88    9.62
   1  41  -2   -2.22   12.29
   1  41   2   22.51   10.22
   1  41   2    2.26   15.23
  -1  41  -2    1.13    9.43
   1 -41  -2   19.44   11.29
  -1   0   3 1145.14  124.65
   1   0  -3 1107.68  101.65
   1   0  -3 1135.89  102.31
   1   0  -3 1066.49   95.72
  -1   0   3 1089.79  105.06
  -1   0   3 1000.97   88.16
  -1   0   3  853.40   86.54
   1   0  -3 1032.70  111.77
  -1   0  -3 1231.02  115.57
  -1   0  -3 1066.10   90.41
   1   0   3  955.90  110.93
  -1   0  -3 1275.60  109.57
  -1   0  -3 1073.54   91.80
  -1   0  -3 1101.34  107.05
  -1   0  -3 1072.85   96.98
   1   0  -3 1033.74  101.63
   1   0  -3 1352.88  148.63
  -1   0   3 1062.73  107.47
  -1   1   3  112.57   22.76
   1   1  -3  123.57   11.36
   1   1  -3  120.19   12.64
  -1   1   3  114.08   10.22
  -1   1   3  101.55   13.21
  -1   1   3  118.64   14.54
   1   1  -3  121.70   11.52
   1   1  -3  128.70   12.97
  -1   1   3  125.90   17.42
  -1  -1  -3  112.93    7.97
  -1  -1  -3  118.83   15.02
   1  -1   3  106.98   14.81
  -1  -1  -3  116.56    6.13
  -1  -1  -3  120.46    8.41
  -1  -1  -3  122.58   10.97
  -1  -1  -3  151.80   12.14
  -1  -1  -3  144.80   16.02
   1   1  -3  120.83   16.14
   1   1  -3  130.13   23.83
   1  -1  -3  124.90   12.40
   1  -1  -3  102.50   17.76
   1  -1  -3  119.88   15.90
   1  -1  -3  122.81   11.64
  -1  -1   3  118.89   10.09
   1  -1  -3  125.45   10.75
  -1  -1   3  125.34   16.93
   1  -1  -3  122.90   13.48
  -1  -1   3  120.67   26.35
  -1  -1   3  124.41   14.13
  -1   1  -3  121.98   11.69
  -1   1  -3  125.62    9.21
  -1   1  -3  150.85   10.55
   1   1   3  105.60   13.77
  -1   1  -3  128.09   14.75
  -1   1  -3  129.83   16.23
  -1   1  -3  126.15    9.97
  -1  -1   3  129.04   20.10
  -1  -1   3   86.08   13.27
   1   2  -3   68.70    8.84
   1   2  -3   68.28    7.50
   1   2  -3   72.35    8.54
   1   2  -3   67.33   11.17
  -1   2   3   68.06   10.51
  -1   2   3   65.66   18.49
  -1   2   3   70.01    7.34
   1   2  -3   70.23   17.26
  -1   2   3   67.10   12.04
   1   2  -3   71.03    9.75
  -1  -2  -3   74.06    4.09
  -1  -2  -3   86.75   12.08
  -1  -2  -3   70.93    7.46
   1  -2   3   59.97   11.15
  -1  -2  -3   72.99   11.08
   1  -2   3   59.88    8.92
  -1  -2  -3   63.67    7.59
  -1  -2  -3   88.35    8.89
  -1  -2  -3   67.48    4.97
  -1   2   3   68.10    9.58
   1  -2  -3   66.35   11.68
   1  -2  -3   75.60    9.26
  -1  -2   3   81.71   14.32
  -1  -2   3   67.40   20.73
  -1  -2   3   71.90   12.71
   1  -2  -3   68.35   11.84
   1  -2  -3   65.85    6.41
   1  -2  -3   70.11    9.85
   1  -2  -3   74.14    7.18
  -1  -2   3   71.40    6.85
   1  -2  -3   68.62    7.52
   1  -2  -3   66.74   13.04
  -1   2  -3   73.39    7.34
   1   2   3   75.41    4.75
   1   2   3   61.64   11.59
  -1   2  -3   68.14   11.43
  -1   2  -3   77.06    6.51
  -1   2  -3   71.08    4.13
  -1   2  -3   85.28    6.30
  -1   2  -3   74.73   10.26
  -1   2  -3   71.33    8.54
  -1  -2   3   74.96    9.88
  -1  -2   3   56.69   12.71
  -1   3   3    8.75    1.74
  -1   3   3    5.51    8.93
  -1   3   3    6.62    3.95
  -1   3   3    6.25    4.51
  -1   3   3    3.01   11.17
  -1   3   3    5.30    5.43
  -1   3   3    6.80    3.08
   1   3  -3    7.84    4.34
   1   3  -3    8.63    3.60
   1   3  -3    7.89    1.32
   1   3  -3    7.12    3.04
   1   3  -3    8.18    3.63
   1   3  -3    3.20    7.45
   1  -3   3   -0.14    4.16
  -1  -3  -3    8.66    4.87
  -1  -3  -3    8.54    1.68
  -1  -3  -3    9.72    2.28
  -1  -3  -3   10.39    5.30
  -1  -3  -3   10.75    3.76
   1  -3   3    5.77    5.01
   1  -3   3    9.23    2.43
  -1  -3  -3    8.22    2.79
  -1  -3  -3    7.31    2.07
   1   3  -3    7.14    4.88
   1  -3  -3    9.63    2.67
   1  -3  -3    8.12    1.58
   1  -3  -3    8.00    2.83
  -1  -3   3    7.22    3.92
  -1  -3   3    8.35    2.62
  -1  -3   3    8.77    9.51
  -1  -3   3    8.00    5.70
   1  -3  -3    8.60    3.66
   1  -3  -3    9.84    4.31
  -1  -3   3    5.89    5.97
  -1  -3   3    9.96    5.89
   1   3   3    8.98    1.71
  -1   3  -3    9.42    1.91
   1   3   3    5.17    3.13
  -1   3  -3    8.05    5.05
  -1   3  -3   13.88    3.92
  -1   3  -3    6.42    5.38
  -1   3  -3    8.52    3.09
  -1   3  -3    5.76    3.63
   1  -3  -3    8.23    5.27
   1  -3  -3    5.88    5.49
  -1   3  -3    9.38    1.43
  -1   4   3  694.86   57.72
  -1   4   3  676.40   66.53
  -1   4   3  660.17   62.59
  -1   4   3  643.85   88.68
  -1   4   3  617.58   50.68
  -1   4   3  656.96   47.79
  -1   4   3  605.16   56.29
   1   4  -3  593.89   68.49
   1   4  -3  602.46   55.51
   1   4  -3  630.32   75.02
  -1  -4  -3  667.85   59.46
  -1  -4  -3  609.88   41.92
   1  -4   3  619.59   43.11
  -1  -4  -3  821.98   65.56
  -1  -4  -3  845.34   72.12
   1  -4   3  525.37   52.06
  -1  -4  -3  655.71   45.04
   1  -4   3  573.75   51.51
  -1  -4  -3  622.44   48.24
  -1  -4  -3  658.46   47.97
   1   4  -3  650.97   66.77
   1   4  -3  638.97   52.30
   1   4  -3  627.46   44.17
   1   4  -3  626.02   50.14
   1   4  -3  632.01   56.72
   1  -4  -3  607.19   57.59
   1  -4  -3  639.43   53.43
   1  -4  -3  615.67   54.43
   1  -4  -3  627.40   59.05
   1  -4  -3  664.62   50.45
   1  -4  -3  692.32   49.25
   1  -4  -3  642.54   60.15
   1  -4  -3  644.50   49.89
  -1  -4   3  600.16   74.67
  -1  -4   3  646.74   62.19
  -1  -4   3  558.81   43.82
  -1  -4   3  620.48   54.06
  -1  -4   3  629.65   53.38
  -1  -4   3  429.28   50.77
  -1  -4   3  612.88   52.97
  -1   4  -3  609.09   47.04
  -1   4  -3  640.90   54.01
  -1   4  -3  655.28   52.76
  -1   4  -3  647.03   46.33
  -1   4  -3  652.01   60.19
  -1   4  -3  665.97   46.16
   1   4   3  569.75   47.97
  -1   4  -3  715.72   64.80
  -1   5   3  109.56   10.43
  -1   5   3  100.84    8.79
  -1   5   3  119.36   17.97
  -1   5   3  121.32   11.88
  -1   5   3  105.02   13.18
  -1   5   3   60.97   10.31
  -1   5   3  115.86   31.16
   1   5  -3  109.84   13.55
   1   5  -3  129.97   15.02
   1   5  -3  109.55    9.63
   1   5  -3   98.79   10.80
   1   5  -3  109.99    6.50
   1   5  -3  102.92   19.10
  -1  -5  -3  110.74    8.87
   1  -5   3   91.66   13.94
  -1  -5  -3  141.17   13.64
  -1  -5  -3  111.43    7.60
  -1  -5  -3  119.04    5.88
   1  -5   3  119.45    6.88
  -1  -5  -3  116.79    6.45
  -1  -5  -3  109.23    7.08
  -1  -5  -3  115.78   13.98
  -1  -5  -3  116.68   12.10
   1  -5   3  103.25   12.43
   1   5  -3  115.25   10.63
   1   5  -3   94.59   11.76
   1  -5  -3  117.57    8.44
   1  -5  -3  131.03    8.26
   1  -5  -3  116.28   14.13
   1  -5  -3  108.91   12.90
   1  -5  -3  107.27   14.61
   1  -5  -3  133.60   16.44
   1  -5  -3  113.82   11.96
   1  -5  -3  118.66    8.80
  -1  -5   3  140.72   13.27
  -1  -5   3   72.44   15.94
  -1  -5   3  111.36   11.25
  -1  -5   3  109.26   23.83
  -1  -5   3  117.08   11.58
  -1  -5   3   96.77    8.17
  -1   5  -3  107.49   13.61
   1   5   3  100.61   10.22
  -1   5  -3  126.13   15.39
  -1   5  -3  109.87    9.06
  -1   5  -3  114.60   11.14
  -1   5  -3  111.82   11.79
  -1   5  -3  107.27    6.92
  -1  -5   3  116.19   15.98
  -1   6   3   36.23    4.08
  -1   6   3   31.79    4.12
  -1   6   3   35.46   19.02
  -1   6   3   29.98    5.12
  -1   6   3   35.20   10.00
  -1   6   3   19.76    5.99
   1   6  -3   33.57    7.41
   1   6  -3   29.31    4.01
   1   6  -3   29.27    6.33
   1   6  -3   32.42    2.78
  -1  -6  -3   37.11    2.76
  -1  -6  -3   37.05    3.18
  -1  -6  -3   34.66    4.05
   1  -6   3   37.03    3.01
  -1  -6  -3   44.21    7.29
   1  -6   3   27.98    7.83
   1  -6   3   27.66   10.85
  -1  -6  -3   32.33    5.50
  -1  -6  -3   33.74    6.51
  -1  -6  -3   36.21    7.46
   1   6  -3   33.15    7.76
   1   6  -3   30.45    5.96
   1   6  -3   30.25   10.06
   1  -6  -3   37.98    8.60
   1  -6  -3   33.37    7.98
   1  -6  -3   31.32    2.76
   1  -6  -3   31.83    6.88
   1  -6  -3   36.34    6.43
   1  -6  -3   38.79    7.23
   1  -6  -3   33.63    3.70
  -1  -6   3   35.16    5.38
  -1  -6   3   23.95    9.48
  -1  -6   3   38.25    5.64
  -1  -6   3   36.80    8.91
  -1  -6   3   37.50    6.46
  -1   6  -3   33.82    6.12
  -1   6  -3   34.63    4.58
  -1   6  -3   32.38    7.47
  -1   6  -3   35.11    6.10
  -1   6  -3   32.46    1.79
  -1   6  -3   31.00    2.96
   1   6   3   29.49    5.30
  -1   6  -3   39.07    8.19
  -1   6  -3   27.94    1.39
  -1  -6   3   32.63    4.31
  -1  -6   3   33.98   13.60
  -1   7   3    7.55    4.77
  -1   7   3   16.76    2.87
  -1   7   3   14.38    3.91
  -1   7   3   17.48    3.10
  -1   7   3   18.48    7.76
  -1   7   3   14.57   14.26
   1   7  -3   14.01    7.13
   1   7  -3   16.11    2.07
   1   7  -3   13.72    2.88
   1   7  -3   14.86    4.70
   1   7  -3   15.56    5.54
   1   7  -3   16.32    3.31
  -1  -7  -3   16.76    2.58
  -1  -7  -3   17.44    5.00
  -1  -7  -3   19.28    2.03
  -1  -7  -3   19.23    2.21
  -1  -7  -3    9.96    2.70
  -1  -7  -3   16.90    5.63
   1  -7   3   13.75   10.69
   1  -7   3   13.61    4.89
  -1  -7  -3   21.40    5.79
   1  -7   3   14.94    1.82
   1   7  -3   12.86    4.79
   1  -7  -3   18.98    5.25
   1  -7  -3   16.14    5.29
   1  -7  -3   17.81    5.46
   1  -7  -3   18.18    6.06
   1  -7  -3   16.92    2.42
   1  -7  -3   16.63    6.02
   1  -7  -3   17.43    2.21
   1  -7  -3   17.88    4.99
  -1  -7   3   17.07    3.88
  -1  -7   3   20.10   10.34
  -1  -7   3   14.92    7.39
  -1  -7   3   20.09    3.88
  -1  -7   3   14.47    4.30
  -1  -7   3   15.26    3.18
  -1  -7   3   16.61    6.72
  -1   7  -3   14.00    1.22
  -1   7  -3   15.53    2.39
   1   7   3   13.75    3.99
  -1   7  -3   17.61    4.83
  -1   7  -3   15.80    3.53
  -1   7  -3   14.23    1.30
  -1   7  -3   15.40    4.66
  -1   7  -3   15.06    5.77
  -1   7  -3   16.01    6.01
  -1   8   3  251.13   17.61
  -1   8   3  184.48   20.19
  -1   8   3  238.15   20.51
  -1   8   3  232.64   46.07
  -1   8   3  276.64   31.46
  -1   8   3  259.41   19.05
   1   8  -3  231.23   21.13
   1   8  -3  264.30   19.23
   1   8  -3  226.37   17.14
   1   8  -3  263.26   25.18
   1   8  -3  247.07   18.61
  -1  -8  -3  281.01   25.28
  -1  -8  -3  275.61   23.30
   1  -8   3  240.61   22.36
  -1  -8  -3  333.86   19.14
  -1  -8  -3  268.47   17.68
  -1  -8  -3  327.90   27.85
  -1  -8  -3  293.81   24.06
   1  -8   3  262.29   15.85
   1   8  -3  253.73   29.18
   1   8  -3  247.02   23.10
   1  -8  -3  284.70   26.44
   1  -8  -3  279.48   25.45
   1  -8  -3  239.40   24.31
   1  -8  -3  286.78   24.48
   1  -8  -3  260.05   23.36
   1  -8  -3  282.38   17.64
   1  -8  -3  319.30   25.39
   1  -8  -3  282.55   17.22
   1  -8  -3  285.98   25.45
  -1  -8   3  278.81   20.76
  -1  -8   3  271.92   22.31
  -1  -8   3  215.84   27.78
  -1  -8   3  267.16   26.45
  -1  -8   3  252.62   18.43
  -1  -8   3  305.96   37.90
   1   8   3  237.15   20.41
  -1   8  -3  244.94   13.81
   1   8   3  246.75   21.18
  -1   8  -3  257.92   22.51
   1   8   3  213.76   20.77
  -1   8  -3  245.93   17.03
  -1   8  -3  258.30   25.32
  -1   8  -3  237.82   14.13
  -1   8  -3  258.84   19.94
  -1   8  -3  272.13   23.14
  -1  -8   3  272.89   19.01
  -1   9   3  410.86   66.23
  -1   9   3  448.46   31.73
  -1   9   3  424.56   36.16
  -1   9   3  481.33   50.21
  -1   9   3  341.25   33.96
  -1   9   3  462.18   35.90
   1   9  -3  500.76   33.36
   1   9  -3  405.76   31.36
   1   9  -3  466.14   47.04
   1   9  -3  467.46   43.14
   1   9  -3  411.67   36.66
  -1  -9  -3  599.32   49.97
  -1  -9  -3  530.63   33.94
   1  -9   3  503.15   33.45
   1  -9   3  505.48   42.63
  -1  -9  -3  521.21   36.09
  -1  -9  -3  496.00   41.13
  -1  -9  -3  459.87   39.58
   1  -9   3  458.38   46.55
  -1  -9  -3  483.46   34.07
   1  -9   3  439.74   38.26
   1   9  -3  452.48   31.60
   1   9  -3  469.61   35.17
   1   9  -3  458.16   40.70
   1  -9  -3  498.28   43.17
   1  -9  -3  432.78   40.66
   1  -9  -3  581.15   45.22
   1  -9  -3  531.94   45.14
   1  -9  -3  543.17   37.04
   1  -9  -3  519.44   44.63
   1  -9  -3  459.55   39.84
   1  -9  -3  504.91   42.74
   1  -9  -3  453.22   32.52
  -1  -9   3  453.35   34.17
  -1  -9   3  501.97   40.50
  -1  -9   3  472.52   44.21
  -1  -9   3  335.58   48.76
  -1  -9   3  399.17   43.63
  -1  -9   3  495.94   37.46
  -1   9  -3  440.43   37.99
   1   9   3  380.16   30.21
  -1   9  -3  471.74   40.72
   1   9   3  405.13   34.74
   1   9   3  425.32   29.31
  -1   9  -3  458.72   42.41
  -1   9  -3  435.32   32.70
  -1   9  -3  452.81   29.74
  -1   9  -3  450.32   35.62
  -1   9  -3  437.85   29.28
   1   9   3  421.03   36.73
  -1  10   3  512.12   41.40
  -1  10   3  390.78   38.96
  -1  10   3  473.29   41.00
   1  10  -3  465.65   41.50
  -1  10   3  495.75   36.07
  -1  10   3  536.17   56.65
  -1  10   3  445.22   70.87
   1  10  -3  521.19   39.41
   1  10  -3  499.32   36.23
   1  10  -3  514.90   47.95
   1  10  -3  447.02   34.67
   1  10  -3  567.51   39.50
   1  10  -3  530.02   46.85
  -1 -10  -3  657.28   56.17
   1 -10   3  508.15   49.54
  -1 -10  -3  517.09   44.89
  -1 -10  -3  573.41   40.34
  -1 -10  -3  575.47   47.92
   1 -10   3  590.18   40.62
   1 -10   3  512.82   44.08
   1 -10   3  560.40   48.39
  -1 -10  -3  548.56   39.83
  -1 -10  -3  608.03   40.07
   1  10  -3  512.10   50.16
   1 -10  -3  630.95   53.17
   1 -10  -3  600.13   51.25
   1 -10  -3  647.90   45.30
   1 -10  -3  518.58   34.56
   1 -10  -3  513.11   45.04
   1 -10  -3  679.27   62.42
   1 -10  -3  563.12   48.93
   1 -10  -3  489.13   46.28
   1 -10  -3  570.37   49.38
  -1 -10   3  495.51   51.02
  -1 -10   3  554.49   42.15
  -1 -10   3  407.97   41.49
  -1 -10   3  573.42   46.62
  -1 -10   3  534.22   49.83
  -1  10  -3  518.32   35.67
  -1  10  -3  495.47   40.40
   1  10   3  534.04   57.13
   1  10   3  433.95   35.52
  -1  10  -3  529.21   46.46
   1  10   3  480.99   34.56
  -1  10  -3  495.81   34.70
  -1  10  -3  503.56   44.07
  -1  10  -3  481.34   37.59
   1  10   3  443.92   40.08
  -1  10  -3  512.98   48.20
  -1 -10   3  520.50   39.91
  -1  11   3  275.75   53.21
  -1  11   3  306.08   27.11
  -1  11   3  262.70   26.74
  -1  11   3  309.88   21.20
   1  11  -3  323.60   40.00
   1  11  -3  304.15   27.90
   1  11  -3  315.94   21.80
   1 -11   3  278.38   31.40
   1 -11   3  358.52   31.83
  -1 -11  -3  346.53   23.69
  -1 -11  -3  363.36   23.65
   1 -11   3  359.75   23.03
  -1 -11  -3  422.24   36.57
  -1 -11  -3  369.31   30.91
  -1 -11  -3  339.53   29.49
  -1 -11  -3  377.85   22.84
   1 -11   3  345.69   29.33
   1 -11   3  364.06   34.09
   1  11  -3  277.22   21.24
   1  11  -3  359.55   23.80
   1  11  -3  288.95   34.27
   1  11  -3  331.77   31.71
  -1  11   3  346.46   39.25
  -1  11   3  293.78   24.73
   1 -11  -3  349.46   20.82
   1 -11  -3  404.34   34.19
   1 -11  -3  329.95   28.91
   1 -11  -3  369.34   31.74
   1 -11  -3  425.83   35.70
   1 -11  -3  363.31   32.20
   1 -11  -3  411.84   27.35
   1 -11  -3  378.56   27.73
   1 -11  -3  322.93   31.32
  -1 -11   3  329.51   24.35
  -1 -11   3  385.66   30.41
  -1 -11   3  349.39   24.98
  -1 -11   3  294.71   30.61
  -1 -11   3  348.03   36.11
  -1  11  -3  319.81   26.10
   1  11   3  303.90   21.05
   1  11   3  329.90   29.35
   1  11   3  275.04   25.73
   1  11   3  276.82   23.15
  -1  11  -3  308.16   30.61
  -1  11  -3  317.52   28.12
  -1  11  -3  310.00   23.89
  -1  11  -3  310.58   20.72
  -1  11  -3  337.11   30.45
  -1  11  -3  313.56   20.82
  -1 -11   3  354.60   33.62
  -1  12   3  340.36   30.28
  -1  12   3  336.90   23.23
  -1  12   3  300.36   35.57
  -1  12   3  319.59   57.94
  -1  12   3  296.99   30.11
  -1  12   3  358.31   30.52
   1  12  -3  303.49   23.60
   1  12  -3  370.55   34.45
   1  12  -3  370.97   26.22
   1  12  -3  388.09   26.94
   1  12  -3  294.16   33.95
   1  12  -3  349.46   24.86
  -1 -12  -3  438.42   27.08
  -1 -12  -3  379.83   33.15
  -1 -12  -3  355.20   29.44
  -1 -12  -3  478.96   41.46
   1 -12   3  396.70   33.04
   1 -12   3  396.01   26.28
  -1 -12  -3  407.98   26.61
   1 -12   3  401.16   35.98
   1 -12   3  445.83   39.05
   1 -12   3  329.70   35.54
  -1 -12  -3  422.03   34.88
   1  12  -3  341.84   31.48
   1  12  -3  335.86   29.60
   1 -12  -3  366.22   34.99
   1 -12  -3  426.12   35.40
   1 -12  -3  422.37   49.30
   1 -12  -3  500.15   41.09
   1 -12  -3  438.00   31.62
   1 -12  -3  371.93   32.36
   1 -12  -3  461.28   31.57
  -1 -12   3  398.79   28.16
  -1 -12   3  451.50   34.98
  -1 -12   3  404.25   37.83
  -1  12  -3  341.32   23.56
   1  12   3  358.58   31.66
   1  12   3  301.08   28.36
  -1  12  -3  342.21   23.68
  -1  12  -3  350.42   27.35
   1  12   3  315.30   26.64
  -1  12  -3  360.62   38.00
  -1  12  -3  375.70   34.23
  -1  12  -3  353.41   34.36
   1  12   3  327.82   23.64
  -1 -12   3  379.98   28.12
  -1 -12   3  368.22   36.41
   1 -12  -3  370.03   24.12
   1  13  -3  112.39   19.06
  -1  13   3  108.94   32.53
  -1  13   3  111.31    7.63
  -1  13   3  118.66   12.97
  -1  13   3  106.80   17.69
  -1  13   3   94.56   10.56
   1  13  -3  101.94   10.01
   1  13  -3  114.97   12.69
   1  13  -3   98.98    8.81
   1  13  -3  125.36    9.35
   1  13  -3  118.17   13.80
   1 -13   3  178.55   23.65
   1  13  -3  123.62    8.91
   1  13  -3  118.77    8.62
   1 -13   3  216.40   20.05
  -1 -13  -3  144.59   14.11
  -1 -13  -3  134.78    8.33
  -1 -13  -3  123.58    9.09
  -1 -13  -3  130.75   13.85
   1 -13   3  139.12   15.78
   1 -13   3  128.93    8.69
  -1 -13  -3  162.27   17.73
  -1 -13  -3  152.86    8.58
   1 -13   3  140.55   13.47
  -1 -13  -3  133.01    8.23
  -1  13   3  121.12   12.60
   1 -13  -3  145.39   10.47
   1 -13  -3  123.66    6.47
   1 -13  -3  153.62   11.42
   1 -13  -3  124.19   15.55
   1 -13  -3  130.30   13.47
   1 -13  -3  147.78   14.18
  -1 -13   3  139.56   16.67
  -1 -13   3  125.49   16.19
  -1 -13   3  140.81   11.08
  -1 -13   3  134.08   16.32
   1  13   3   99.90   12.01
  -1  13  -3  133.75   14.18
  -1  13  -3  198.41   17.72
  -1  13  -3  126.61   12.88
   1  13   3  102.92   10.63
  -1  13  -3  112.30    8.41
  -1  13  -3  117.61   15.27
  -1  13  -3  122.82   14.60
  -1  13  -3  116.58    8.18
   1  13   3  119.04   12.80
   1  13   3  103.71    8.33
  -1 -13   3  137.47    9.60
   1 -13  -3  175.80   17.07
   1 -13  -3  126.94   22.27
   1 -13  -3  136.51   13.38
  -1  14   3  213.45   27.86
  -1  14   3  209.67   46.64
  -1  14   3  237.51   21.65
  -1  14   3  187.02   17.02
  -1  14   3  252.19   16.17
   1  14  -3  249.12   23.35
   1  14  -3  229.44   15.59
   1  14  -3  180.37   14.61
   1  14  -3  218.09   20.60
   1  14  -3  232.63   21.19
   1  14  -3  195.98   16.44
   1  14  -3  244.11   17.40
   1  14  -3  238.01   16.84
  -1 -14  -3  278.02   16.82
  -1 -14  -3  310.81   28.62
  -1 -14  -3  287.65   23.70
   1 -14   3  228.38   17.31
  -1 -14  -3  256.11   22.62
   1 -14   3  271.00   25.72
  -1 -14  -3  294.23   19.73
  -1 -14  -3  279.92   17.11
  -1 -14  -3  243.19   17.13
   1 -14   3  273.34   22.41
  -1  14   3  231.84   21.53
   1 -14  -3  293.60   23.85
   1 -14  -3  247.68   21.90
   1 -14  -3  241.52   13.01
   1 -14  -3  248.24   23.32
   1 -14  -3  274.14   22.48
   1 -14  -3  247.98   24.53
  -1 -14   3  271.87   17.89
  -1 -14   3  284.80   26.79
  -1 -14   3  250.23   18.77
  -1 -14   3  254.17   19.90
  -1 -14   3  281.84   27.06
  -1  14  -3  229.08   24.53
   1  14   3  194.01   19.48
   1  14   3  221.99   20.22
  -1  14  -3  242.28   23.36
  -1  14  -3  242.15   21.24
   1  14   3  193.18   14.69
  -1  14  -3  251.49   22.82
  -1  14  -3  217.03   15.61
  -1  14  -3  233.81   15.98
   1  14   3  198.28   17.68
  -1  14  -3  240.19   15.60
   1 -14  -3  307.78   20.98
  -1  15   3  209.08   13.55
  -1  15   3  200.69   19.10
  -1  15   3  179.64   41.47
  -1  15   3  212.02   26.82
   1  15  -3  217.71   30.23
   1  15  -3  196.82   18.35
   1  15  -3  176.08   17.44
   1  15  -3  145.98   12.81
   1 -15   3  229.37   19.20
  -1 -15  -3  240.10   14.05
  -1 -15  -3  221.79   20.36
   1 -15   3  235.21   23.24
  -1 -15  -3  233.14   14.09
  -1 -15  -3  244.97   20.32
   1 -15   3  214.29   15.76
  -1 -15  -3  262.50   24.97
  -1 -15  -3  220.84   15.86
  -1 -15  -3  257.61   15.09
   1  15  -3  182.14   12.51
   1  15  -3  200.77   14.85
   1  15  -3  197.10   14.25
  -1  15   3  166.96   15.00
   1 -15  -3  249.98   20.22
   1 -15  -3  216.26   21.90
   1 -15  -3  216.53   21.01
   1 -15  -3  216.08   19.44
  -1 -15   3  229.30   17.40
  -1 -15   3  243.95   24.05
  -1 -15   3  262.12   24.77
  -1 -15   3  237.05   18.45
  -1 -15   3  236.35   15.35
   1  15   3  182.25   17.35
   1  15   3  163.58   17.09
  -1  15  -3  203.29   20.40
  -1  15  -3  199.95   13.27
  -1  15  -3  204.41   21.32
   1  15   3  170.61   16.35
  -1  15  -3  217.91   20.10
  -1  15  -3  205.58   18.72
  -1  15  -3  195.10   17.23
  -1  15  -3  183.18   13.81
   1  15   3  157.94   12.54
  -1  15  -3  198.60   13.81
   1 -15  -3  240.16   19.88
   1 -15  -3  279.35   18.63
  -1  16   3  181.89   41.83
  -1  16   3  166.96   14.46
  -1  16   3  183.60   25.91
  -1  16   3  208.06   19.98
   1  16  -3  199.18   18.43
   1  16  -3  203.87   14.63
   1  16  -3  193.88   18.65
   1  16  -3  173.97   17.39
   1  16  -3  187.29   14.34
  -1 -16  -3  274.18   25.83
   1  16  -3  194.39   12.84
   1 -16   3  223.77   18.61
  -1 -16  -3  246.10   14.52
  -1 -16  -3  240.76   20.16
  -1 -16  -3  219.34   19.94
   1 -16   3  235.85   23.19
  -1 -16  -3  212.75   15.61
   1 -16   3  238.77   16.32
  -1  16   3  196.99   12.75
   1 -16  -3  207.13   18.80
   1 -16  -3  256.09   27.16
   1 -16  -3  246.41   19.49
   1 -16  -3  292.07   19.03
   1 -16  -3  219.50   21.97
   1 -16  -3  211.28   20.63
  -1 -16   3  227.33   17.07
  -1 -16   3  214.29   14.23
  -1 -16   3  275.86   25.08
  -1 -16   3  249.17   18.86
  -1 -16   3  239.94   23.19
  -1  16  -3  202.53   14.43
  -1  16  -3  212.11   19.72
  -1  16  -3  197.57   17.63
   1  16   3  151.11   12.42
   1  16   3  156.64   16.28
  -1  16  -3  206.37   18.92
  -1  16  -3  177.24   13.76
   1  16   3  164.37   16.32
  -1  16  -3  196.36   13.17
  -1  16  -3  204.32   20.41
   1  16   3  177.87   16.46
  -1  17   3  121.00   10.96
  -1  17   3  127.41   20.85
  -1  17   3  114.97    8.41
  -1  17   3  150.17   15.97
   1  17  -3  141.96   14.17
   1  17  -3  139.02   14.67
   1  17  -3  144.94   10.76
   1  17  -3  127.01    8.43
   1  17  -3  125.21   13.36
  -1 -17  -3  157.79   11.94
  -1 -17  -3  173.80   15.34
   1 -17   3  184.69   12.40
  -1 -17  -3  172.29   10.22
  -1 -17  -3  151.18   15.25
   1 -17   3  161.45   17.78
  -1 -17  -3  192.17   19.92
   1 -17   3  157.27   13.86
  -1  17   3  130.91   35.28
   1 -17  -3  145.96   14.11
   1 -17  -3  175.08   14.84
   1 -17  -3  207.40   20.02
   1 -17  -3  145.93   16.15
   1 -17  -3  194.45   12.83
   1 -17  -3  160.14   13.27
  -1 -17   3  172.13   18.09
  -1 -17   3  161.50   12.60
  -1 -17   3  150.47   10.06
  -1 -17   3  180.26   14.34
  -1 -17   3  204.23   19.26
  -1  17  -3  146.68   16.35
  -1  17  -3  213.92   16.78
  -1  17  -3  132.60    9.27
  -1  17  -3  120.33   10.26
   1  17   3  111.70   12.98
  -1  17  -3  148.85   14.97
  -1  17  -3  140.21   10.56
   1  17   3  128.38   12.72
   1  17   3  108.82   12.51
  -1  17  -3  144.96   14.80
   1 -17  -3  152.95   16.92
  -1  18   3    4.59    3.59
  -1  18   3    3.99    2.10
   1  18  -3    3.89    1.67
   1  18  -3    3.63    2.84
   1  18  -3    5.22    3.01
   1  18  -3    3.66    2.84
  -1 -18  -3    4.50    3.14
   1 -18   3    2.74    2.54
   1 -18   3    1.45    1.63
   1 -18   3    2.81    4.47
  -1 -18  -3    6.50    4.33
  -1 -18  -3    3.17    1.28
  -1 -18  -3    3.55    2.93
   1 -18   3    4.70    4.09
  -1 -18  -3    5.13    1.83
   1  18  -3    4.22    3.28
  -1  18   3    3.35   10.15
  -1  18   3    3.49    5.14
   1 -18  -3    3.81    2.39
   1 -18  -3    4.49    3.84
   1 -18  -3    6.92    4.33
   1 -18  -3    3.54    2.83
  -1 -18   3    3.29    1.68
  -1 -18   3    4.06    2.74
  -1 -18   3    3.53    2.04
   1  18   3    3.25    2.35
   1  18   3    3.50    2.66
  -1  18  -3    2.07    1.96
   1  18   3    3.59    2.78
  -1  18  -3    4.63    3.72
  -1  18  -3    2.28    3.01
  -1  18  -3    4.52    1.66
  -1  18  -3    3.55    2.97
  -1  18  -3    3.66    1.37
  -1  18  -3   15.73    3.91
  -1 -18   3    4.58    3.95
  -1 -18   3    4.64    5.09
   1 -18  -3    5.35    3.62
   1 -18  -3    5.18    3.08
  -1  19   3   34.23    7.92
  -1  19   3   29.39    4.60
  -1  19   3   15.00   20.72
   1  19  -3   32.37    3.93
   1  19  -3   36.77    6.63
  -1 -19  -3   42.18    6.64
  -1 -19  -3   36.55    6.81
   1 -19   3   39.76    8.66
  -1 -19  -3   32.95    4.43
   1 -19   3   36.95    5.64
   1 -19   3   44.64    9.35
  -1 -19  -3   39.28    3.46
  -1  19   3   28.03   10.75
   1  19  -3   33.04    7.08
   1  19  -3   29.90    6.16
   1  19  -3   34.78   10.60
   1 -19  -3   50.21    9.38
   1 -19  -3   39.37    5.13
   1 -19  -3   44.63    6.72
   1 -19  -3   35.09    7.80
  -1 -19   3   39.82    6.35
  -1 -19   3   45.49    6.20
  -1 -19   3   38.19    5.01
  -1 -19   3   36.50    4.41
  -1 -19   3   45.70    8.67
  -1  19  -3   36.28    8.21
   1  19   3   37.33   10.92
  -1  19  -3   34.84    7.77
   1  19   3   28.61    5.47
   1  19   3   22.26    6.17
  -1  19  -3   30.78    6.66
  -1  19  -3   31.19    4.13
  -1  19  -3   30.11    3.35
  -1  19  -3   33.57    6.30
  -1  19  -3   26.65    4.66
   1 -19  -3   33.27    5.99
   1 -19  -3   38.46    8.17
  -1  20   3    3.38   12.88
  -1  20   3   15.11    4.99
   1  20  -3    8.17    3.96
   1  20  -3    6.37    3.59
   1  20  -3    6.84    4.01
   1  20  -3    6.29    3.54
   1  20  -3    6.56    2.12
  -1 -20  -3    7.48    2.32
   1 -20   3    6.48    2.99
  -1 -20  -3    5.72    3.50
  -1 -20  -3    5.47    1.59
  -1 -20  -3    7.22    3.89
  -1  20   3    8.22    2.63
   1 -20  -3    6.17    4.47
   1 -20  -3    6.68    4.45
  -1 -20   3    7.84    5.04
  -1 -20   3    7.21    3.41
  -1 -20   3    5.99    2.68
  -1 -20   3    8.18    3.46
  -1  20  -3    6.43    4.26
  -1  20  -3    5.89    2.55
   1  20   3    8.23    3.66
  -1  20  -3    6.22    1.78
   1  20   3    2.74    6.56
   1  20   3    6.46    3.93
  -1  20  -3    6.22    3.76
  -1  20  -3    8.39    3.35
  -1  20  -3    5.34    2.21
  -1 -20   3    7.09    2.26
   1 -20  -3    8.52    3.87
   1 -20  -3    9.38    2.75
   1 -20  -3    6.71    3.24
  -1  21   3    2.60   12.84
  -1  21   3    5.02    5.09
   1  21  -3    8.69    4.12
   1  21  -3    5.47    3.41
   1  21  -3    5.83    4.01
  -1 -21  -3    5.70    3.91
   1 -21   3    6.17    3.00
  -1 -21  -3    5.38    3.35
   1  21  -3    9.96    2.22
   1 -21  -3    7.89    2.71
  -1 -21   3    6.73    2.29
   1 -21  -3    6.23    8.01
  -1 -21   3    6.84    3.41
  -1 -21   3    7.42    3.30
  -1  21  -3    7.12    4.29
  -1  21  -3    5.43    2.68
  -1  21  -3    6.16    1.88
  -1  21  -3    7.47    2.32
  -1  21  -3    3.55    6.51
  -1  21  -3    5.33    3.85
  -1  21  -3   26.23    4.76
   1  21   3    5.09    3.97
   1  21   3    4.66    5.14
  -1 -21   3    2.99    2.71
   1 -21  -3    6.27    3.26
   1 -21  -3    7.06    4.66
  -1  22   3   27.45   23.93
   1  22  -3   44.18    8.48
   1  22  -3   41.88    7.97
  -1 -22  -3   57.90   10.72
  -1 -22  -3   46.81    7.13
  -1 -22  -3   44.54    8.02
   1 -22   3   46.67    8.72
   1  22  -3   41.05    7.55
  -1  22   3   42.04    9.79
   1 -22  -3   45.82   15.76
   1 -22  -3   44.87    9.29
  -1 -22   3   44.30    6.05
  -1 -22   3   46.75    6.85
  -1  22  -3   39.09    8.12
  -1  22  -3   41.34    5.31
  -1  22  -3   41.32    8.59
  -1  22  -3   45.70    7.20
   1  22   3   36.20    7.98
  -1  22  -3   39.58   13.64
  -1  22  -3   29.25    9.13
   1  22   3   37.62   10.81
  -1 -22   3   46.14    5.50
   1 -22  -3   43.01    6.96
  -1  23   3  155.57   20.44
  -1  23   3  150.43   46.05
   1  23  -3  150.19   16.30
   1  23  -3  142.08   16.25
   1  23  -3  151.89   17.81
  -1 -23  -3  162.64   17.82
  -1 -23  -3  184.92   17.24
   1 -23   3  165.27   18.88
  -1 -23  -3  202.23   22.66
   1 -23  -3  150.10   15.47
  -1 -23   3  160.33   13.43
  -1 -23   3  177.78   16.22
  -1  23  -3  149.89   25.31
  -1  23  -3  150.40   17.51
  -1  23  -3  134.31   17.28
  -1  23  -3  142.81   17.74
   1  23   3  124.91   16.44
  -1  23  -3  153.44   15.52
   1  23   3  135.01   22.12
   1 -23  -3  168.05   20.10
   1 -23  -3  174.49   33.07
  -1  24   3   22.24    8.02
   1  24  -3   22.14    5.91
   1  24  -3   19.49    6.31
   1 -24   3   23.32    6.71
  -1 -24  -3   23.89    5.93
  -1 -24  -3   25.89    5.30
   1  24  -3   19.28    5.55
  -1  24   3   21.72   19.86
   1 -24  -3   26.74    8.29
  -1 -24   3   27.12    5.04
  -1 -24   3   21.02    3.88
  -1  24  -3   20.88    4.88
  -1  24  -3   23.55    6.84
   1  24   3   20.81    6.56
  -1  24  -3   17.49    6.34
  -1  24  -3   14.97    5.80
   1  24   3    7.39    9.55
   1 -24  -3   26.81    7.34
   1 -24  -3   20.02    4.97
   1  25  -3   13.15    4.63
   1  25  -3    9.65    4.43
   1  25  -3   11.84    5.37
  -1 -25  -3   13.50    4.84
   1 -25   3   10.77    5.46
  -1 -25  -3   11.85    3.97
  -1  25   3    7.94    6.51
   1 -25  -3   15.32    6.59
   1 -25  -3    9.17    3.75
   1 -25  -3   11.14    5.93
  -1 -25   3   11.61    3.81
  -1  25  -3    9.25    4.85
  -1  25  -3   11.29    5.38
  -1  25  -3   15.15    6.22
  -1  25  -3   11.55    3.95
   1  25   3   20.84    8.18
  -1  26   3   33.92   13.34
   1  26  -3   46.28   13.23
   1  26  -3   33.00    7.08
   1  26  -3   36.86    8.80
  -1 -26  -3   41.55    8.39
   1 -26   3   34.74    8.39
  -1 -26  -3   37.90    6.38
  -1  26   3   41.45   16.09
   1 -26  -3   46.39   10.68
   1 -26  -3   43.70    9.62
  -1 -26   3   40.44    6.01
  -1  26  -3   29.15    7.77
   1  26   3    0.41   23.51
   1  26   3   43.87   12.30
  -1  26  -3   35.31    6.04
  -1  26  -3   36.58    8.35
  -1  26  -3   38.51    9.83
   1 -26  -3   32.92    5.83
  -1  27   3    8.33   10.93
   1  27  -3   24.81   10.81
   1  27  -3   18.65    5.17
   1  27  -3   14.90    6.01
   1  27  -3   12.09    4.71
  -1 -27  -3   16.46    5.71
   1 -27   3   16.10    5.72
  -1 -27  -3   12.35    3.96
  -1  27   3   18.85    6.75
  -1  27   3   14.42    9.42
  -1 -27   3   13.11    6.71
  -1  27  -3   15.09    6.87
  -1  27  -3   17.80    5.84
   1  27   3   15.76    6.52
   1  27   3    8.87   17.09
  -1  27  -3   13.40    3.87
  -1  27  -3   13.18    5.62
  -1  27  -3   12.59    5.42
   1 -27  -3   18.86    6.56
   1 -27  -3   19.61    7.58
  -1  28   3   42.07    9.55
  -1  28   3   26.35   13.82
   1  28  -3   43.57    6.85
   1  28  -3   49.01    9.64
   1  28  -3   36.71    8.73
  -1 -28  -3   31.39    6.30
   1 -28   3   39.66    8.34
  -1 -28  -3   45.91    8.64
   1  28  -3   37.11    7.18
  -1  28   3   32.44   13.36
   1 -28  -3   47.70    9.64
  -1 -28   3   43.91    5.92
  -1  28  -3   40.90    8.71
  -1  28  -3   46.93    8.56
   1  28   3   22.05   22.01
   1  28   3   33.56   14.64
  -1  28  -3   41.59   10.06
  -1  28  -3   31.25    7.96
   1 -28  -3   50.20   10.93
   1  29  -3    6.81    4.74
   1  29  -3    4.66    4.38
   1  29  -3    6.41    6.80
   1  29  -3    6.67    3.08
  -1 -29  -3    7.39    3.83
   1 -29   3    6.33    4.33
  -1 -29  -3    7.35    3.92
  -1  29   3    3.58    6.66
  -1  29   3    2.72   13.55
  -1  29   3    4.83    4.68
   1 -29  -3    5.87    4.71
  -1 -29   3    7.00    2.62
  -1  29  -3    7.76    4.06
  -1  29  -3    6.30    4.85
  -1  29  -3    3.85    3.87
  -1  29  -3    5.85    4.13
   1  29   3    5.39    4.93
   1  29   3    5.21   10.81
   1 -29  -3    8.10    5.09
   1  30  -3    8.29    5.17
   1  30  -3   10.46    3.29
   1  30  -3   14.68    5.54
   1  30  -3    8.60    4.33
  -1 -30  -3   12.26    4.60
  -1 -30  -3    8.30    4.06
   1 -30   3   13.02    4.95
  -1  30   3    7.60    5.20
   1 -30  -3   12.73    5.89
  -1 -30   3    9.75    2.80
  -1  30  -3    6.04    4.50
  -1  30  -3    9.87    4.39
  -1  30  -3   10.06    5.68
   1  30   3    6.89   11.65
  -1  30  -3    7.87    4.92
   1  30   3    7.64    5.62
   1 -30  -3   10.81    5.52
   1  31  -3    4.41    4.00
   1  31  -3    9.21    2.32
   1  31  -3    0.09    3.66
   1  31  -3   -0.32    3.01
  -1 -31  -3   -0.12    3.31
   1 -31   3   -0.16    3.53
  -1  31   3    0.03    3.63
   1 -31  -3    6.79    3.97
  -1  31  -3   -0.05    2.84
   1  31   3    0.89    7.77
   1  31   3    0.12    3.95
  -1  31  -3    0.11    3.96
  -1  31  -3    0.30    3.16
  -1  31  -3    3.01    3.56
   1 -31  -3   -0.16    4.29
  -1  32   3    0.03    3.09
   1  32  -3    3.39    3.39
   1  32  -3   -0.03    1.72
   1  32  -3   -0.12    2.51
   1  32  -3   -0.09    3.10
   1 -32   3    0.12    3.06
  -1 -32  -3    0.17    2.79
   1 -32  -3    7.42    3.29
   1 -32  -3   -0.30    3.74
  -1  32  -3    0.01    2.29
   1  32   3    1.64    6.89
  -1  32  -3    0.12    2.64
   1  32   3   -0.13    3.79
  -1  32  -3   -0.07    3.39
   1  32   3    0.08    3.33
  -1  32  -3    3.42    3.05
  -1  33   3   17.01    5.99
   1  33  -3   19.55    6.59
   1  33  -3   12.81    4.80
   1 -33   3   18.52    6.17
  -1 -33  -3   -0.05    5.46
   1  33  -3   -0.07    6.14
   1  33   3   17.53    6.47
  -1  33  -3   -0.58    6.68
  -1  33  -3   -0.70    5.17
   1  33   3    1.89   12.61
  -1  33  -3   15.42    4.16
  -1  33  -3    5.41    6.04
   1  33   3    0.13    7.55
   1 -33  -3   20.10    7.51
   1 -33  -3   17.68    6.47
  -1  34   3    0.54    5.83
   1  34  -3    0.16    3.56
   1  34  -3    0.00    3.00
   1  34  -3    4.09    3.85
   1 -34   3   -0.32    3.66
  -1  34   3   -0.16    3.49
   1 -34  -3    0.22    4.47
   1 -34  -3   13.97    6.54
  -1  34  -3   -0.24    2.29
   1  34   3    0.14    3.78
  -1  34  -3    0.20    3.91
  -1  34  -3    4.46    3.54
   1  34   3    0.29    4.52
   1  35  -3   -0.28    3.58
   1  35  -3   -0.37    2.26
   1  35  -3    0.63    3.03
   1 -35   3   -0.03    2.87
  -1 -35  -3    0.14    2.57
  -1  35   3    0.33    3.09
  -1  35   3    0.08    4.76
   1 -35  -3   -0.26    4.35
  -1  35  -3   -0.03    1.64
  -1  35  -3   -0.03    3.06
   1  35   3    1.50    3.20
   1  35   3    0.12    3.80
  -1  35  -3    0.72    2.85
   1 -35  -3    0.57    3.62
   1  36  -3    0.16    2.81
   1  36  -3    0.12    5.09
   1 -36   3    0.07    3.66
  -1 -36  -3    5.10    3.22
   1  36  -3   -0.79    6.59
  -1  36   3    0.17    3.75
  -1  36   3    1.33    7.39
   1 -36  -3    0.36    4.67
   1 -36  -3    0.07    5.63
  -1  36  -3    0.59    3.63
  -1  36  -3    0.22    4.81
   1  36   3    0.00    3.95
   1  36   3   -0.16    4.95
  -1  37   3    0.55   15.31
   1  37  -3    0.00    5.89
   1  37  -3   12.04    9.30
  -1 -37  -3   28.56    6.18
   1 -37   3   14.94    7.71
  -1  37   3   20.35    7.79
   1 -37  -3    0.12   11.80
   1  37   3    0.26   17.28
   1 -37  -3   13.73    8.67
   1  38  -3   -3.30    3.33
   1  38  -3   -0.80    2.37
  -1 -38  -3   -1.49    1.97
   1 -38   3    4.18    2.74
  -1  38   3    2.01    5.39
   1 -38  -3   -0.09    2.91
  -1  38  -3    0.07    2.20
   1  38   3   -0.20    4.06
   1 -38  -3    2.87    3.97
  -1  39   3    1.49   14.32
   1  39  -3    7.05    8.71
   1  39  -3    1.39    6.43
   1 -39   3   16.00    7.41
   1 -39   3   -2.43   10.63
  -1  39   3   26.11    6.83
   1 -39  -3    5.81   10.54
   1 -39  -3    3.64    7.93
  -1 -39   3    4.83    6.72
   1  39   3    1.92   11.08
   1  39   3   32.16    7.30
  -1  39  -3    0.63    6.18
   1 -40   3   20.60   14.23
   1 -40   3   11.51   10.92
   1  40  -3    0.86   12.44
  -1  40   3    7.75   22.49
  -1  40   3   44.79    8.91
   1  40   3   52.01    9.38
   1  40   3    2.62   15.53
   1 -40  -3   11.55   14.90
  -1   0   4    2.10    2.95
   1   0  -4    1.60    3.21
  -1   0   4    2.71    3.04
   1   0  -4    0.84    2.05
   1   0  -4    1.99    1.75
   1   0  -4    1.95    2.76
  -1   0   4    2.99    1.89
  -1   0   4    0.87    4.60
   1   0  -4    1.35    2.39
  -1   0  -4    1.62    3.29
  -1   0  -4    5.20    2.30
  -1   0  -4    1.00    3.37
  -1   0  -4    1.87    1.75
   1   0   4    1.80    3.12
  -1   0  -4    1.25    1.41
  -1   0  -4    1.72    1.34
  -1   0   4    1.28    3.50
  -1   1   4   68.03    7.16
  -1   1   4   72.69   15.94
   1   1  -4   69.54    7.05
  -1   1   4   68.56   11.85
   1   1  -4   68.31   10.55
   1   1  -4   73.73    8.14
   1   1  -4   72.61   13.68
  -1   1   4   69.49   10.56
  -1   1   4   64.65    9.69
   1   1  -4   73.82    9.64
  -1  -1  -4   66.87    5.51
  -1  -1  -4   82.49    7.58
   1  -1   4   59.92   10.21
  -1  -1  -4   77.27    2.81
  -1  -1  -4   75.50    8.08
  -1  -1  -4   70.15   10.94
  -1  -1  -4   70.44    5.05
  -1  -1  -4   74.14   11.17
  -1  -1   4   78.66   13.71
   1  -1  -4   65.91   10.62
  -1  -1   4   74.95    7.76
  -1  -1   4   53.69    9.79
   1  -1  -4   70.29    9.60
  -1  -1   4   66.97   11.51
  -1  -1   4   72.58   10.34
   1  -1  -4   55.05   14.52
   1  -1  -4   73.12    2.83
   1  -1  -4   74.66    8.84
   1   1   4   70.19    3.09
   1  -1  -4   73.48    7.09
  -1   1  -4   72.06   11.06
  -1   1  -4   74.89    6.26
  -1   1  -4   73.95    6.18
  -1   1  -4   73.52    8.44
  -1   1  -4   90.83   13.69
  -1   1  -4   73.77    6.13
   1   1   4   62.47   10.15
   1  -1  -4   67.74    9.18
  -1   2   4  113.94   12.85
  -1   2   4  111.10   15.65
  -1   2   4  110.26   21.28
  -1   2   4  110.82   13.89
   1   2  -4  107.68   13.89
   1   2  -4  118.10   12.48
   1   2  -4  112.65   10.75
  -1   2   4  113.56   10.25
   1   2  -4  123.57   11.97
  -1  -2  -4  109.80    7.71
  -1  -2  -4  138.05   11.46
   1  -2   4  100.40   23.05
  -1  -2  -4  115.73   14.23
  -1  -2  -4  119.90   10.84
  -1  -2  -4  125.41   15.14
  -1  -2  -4  114.45    7.04
   1   2  -4  126.91    5.37
   1   2  -4  115.24   10.31
   1  -2  -4  130.34    9.60
  -1  -2   4  119.60   16.32
  -1  -2   4  112.65   26.12
  -1  -2   4  116.06   13.40
  -1  -2   4   80.90   12.58
  -1  -2   4  134.14   16.93
  -1  -2   4  117.35   10.13
   1  -2  -4  133.46    5.60
   1  -2  -4  107.84   13.88
   1  -2  -4  122.87   18.57
   1  -2  -4  110.05   12.52
   1  -2  -4  113.27   13.32
   1  -2  -4  121.84   12.34
  -1   2  -4  125.38    9.60
   1   2   4  100.17   10.05
  -1   2  -4  141.05   17.56
   1   2   4  116.00    5.51
   1   2   4  102.42   13.22
  -1   2  -4  118.90   14.97
  -1   2  -4  119.56   11.92
  -1   2  -4  124.65    9.59
   1   3  -4  100.61   10.87
  -1   3   4   89.82   19.80
   1   3  -4   93.18    9.33
  -1   3   4   95.21    9.39
  -1   3   4  114.83   13.76
  -1   3   4  101.82   18.31
   1   3  -4   90.21   12.61
  -1   3   4   88.87   12.48
  -1   3   4   94.67   14.14
   1   3  -4  112.37    4.33
   1   3  -4  107.11   11.18
   1   3  -4   90.05    9.14
  -1  -3  -4  100.17   13.36
   1  -3   4   82.92   12.88
  -1  -3  -4   96.98    9.22
   1  -3   4   90.16    3.60
   1  -3   4   81.78   10.98
  -1  -3  -4  108.44    8.44
  -1  -3  -4  102.63   10.85
  -1  -3  -4  117.14   10.90
  -1  -3  -4  112.20   13.97
   1   3  -4   91.12    4.13
  -1  -3   4   62.15   11.56
  -1  -3   4   91.25   23.82
   1  -3  -4   98.01    7.84
   1  -3  -4   93.46   11.36
   1  -3  -4   94.17   13.64
  -1  -3   4   95.88    8.64
   1  -3  -4  108.69   16.63
   1  -3  -4  100.77   11.33
   1  -3  -4  112.28    4.79
   1  -3  -4  107.60    7.81
   1  -3  -4  150.44   14.44
  -1  -3   4  120.04   14.48
  -1  -3   4   98.08   14.93
   1   3   4   98.06    4.84
  -1   3  -4  115.57   15.69
   1   3   4   86.74   11.97
  -1   3  -4  101.30   10.87
   1   3   4   95.26    4.04
  -1   3  -4  104.88    8.91
   1   3   4   81.61    9.05
  -1   3  -4   93.46    3.97
  -1   3  -4   96.63   13.54
  -1   3  -4  109.91    8.87
  -1   4   4  185.59   31.89
  -1   4   4  217.80   22.12
  -1   4   4  215.95   23.78
  -1   4   4  194.05   20.38
   1   4  -4  217.93   18.56
   1   4  -4  197.48   17.02
   1   4  -4  253.07   11.81
   1   4  -4  204.57   16.86
  -1   4   4  179.29   15.63
  -1   4   4  200.33   16.82
   1   4  -4  208.92   19.57
   1   4  -4  205.54   10.48
   1   4  -4  200.36   20.78
  -1  -4  -4  242.14   24.24
   1  -4   4  179.74   20.81
  -1  -4  -4  259.96   20.84
  -1  -4  -4  222.00   12.42
   1  -4   4  183.48   18.80
  -1  -4  -4  217.32   14.65
  -1  -4  -4  215.53   22.07
   1  -4   4  214.33   10.06
  -1  -4  -4  217.24   16.68
   1  -4  -4  242.14   11.93
  -1  -4   4  202.54   18.95
   1  -4  -4  202.29   22.18
   1  -4  -4  228.75   14.86
   1  -4  -4  239.80   26.33
  -1  -4   4  195.52   17.26
  -1  -4   4  199.37   35.02
  -1  -4   4  198.39   15.31
   1  -4  -4  227.54   20.59
   1  -4  -4  253.38   23.32
   1  -4  -4  210.13   29.85
  -1  -4   4  215.91   24.76
   1   4   4  193.98   19.74
  -1   4  -4  221.72   17.18
   1   4   4  214.25   10.54
  -1   4  -4  241.19   25.91
   1   4   4  176.96   16.13
  -1   4  -4  246.52   23.62
  -1   4  -4  190.85    9.67
   1   4   4  207.45   11.31
  -1   4  -4  218.00   23.03
   1  -4  -4  212.24   14.59
   1   5  -4   34.31    6.13
  -1   5   4   33.08    7.72
   1   5  -4   75.19    9.00
   1   5  -4   37.59    7.17
   1   5  -4   31.20    2.53
   1   5  -4   34.69    9.77
   1   5  -4   28.23    6.81
   1   5  -4   35.77    5.39
  -1   5   4   39.28   15.72
  -1   5   4   37.38    2.64
  -1   5   4   33.60    5.25
   1   5  -4   41.13    1.87
   1  -5   4   37.02    1.64
   1  -5   4   27.70    8.22
  -1  -5  -4   36.15    3.95
  -1  -5  -4   45.32    6.98
  -1  -5  -4   38.79    5.04
  -1  -5  -4   43.00    9.31
  -1  -5  -4   37.79    2.05
   1  -5   4   32.29    7.22
  -1  -5  -4   32.95    8.55
  -1   5   4   32.87    5.50
   1  -5  -4   38.88    7.47
   1  -5  -4   50.70    8.10
   1  -5  -4   36.70    7.71
  -1  -5   4   36.13   15.38
  -1  -5   4   36.33    6.64
  -1  -5   4   32.91    4.72
   1  -5  -4   41.92    2.20
   1  -5  -4   37.61    3.67
  -1  -5   4   19.51    7.38
   1  -5  -4   31.92    8.55
  -1  -5   4   33.23    9.88
   1  -5  -4   45.53   10.02
   1  -5  -4   39.36    3.60
  -1  -5   4   39.16    5.88
  -1   5  -4   35.38    4.72
  -1   5  -4   40.92   10.00
   1   5   4   36.25    2.45
  -1   5  -4   36.05    6.93
  -1   5  -4   31.58    1.95
   1   5   4   36.32    1.92
   1   5   4   30.96    5.68
  -1   5  -4   36.75    5.67
  -1   5  -4   28.62    8.23
   1   6  -4  420.43   39.57
  -1   6   4  515.62   50.67
   1   6  -4  528.51   32.10
  -1   6   4  420.66   33.79
   1   6  -4  487.46   39.59
   1   6  -4  444.83   38.28
   1   6  -4  465.95   42.43
   1   6  -4  422.18   34.25
   1   6  -4  489.75   45.63
  -1   6   4  450.97   37.05
  -1   6   4  439.49   41.86
  -1   6   4  482.20   32.48
   1   6  -4  446.93   28.61
  -1  -6  -4  495.42   46.29
  -1  -6  -4  465.44   26.99
  -1  -6  -4  456.11   32.37
   1  -6   4  386.91   39.99
  -1  -6  -4  576.98   47.41
  -1  -6  -4  585.77   52.38
  -1  -6  -4  476.49   36.44
   1  -6   4  427.16   39.65
   1  -6   4  478.90   28.73
  -1  -6  -4  469.66   33.90
  -1  -6   4  293.21   56.33
   1  -6  -4  511.98   35.32
   1  -6  -4  551.47   34.21
   1  -6  -4  514.11   35.13
   1  -6  -4  479.03   42.75
  -1  -6   4  530.54   42.47
  -1  -6   4  461.12   60.17
  -1  -6   4  540.72   42.83
  -1  -6   4  425.11   33.07
   1  -6  -4  482.42   42.22
   1  -6  -4  577.89   53.47
  -1  -6   4  461.78   39.24
  -1   6  -4  465.07   44.60
   1   6   4  412.26   36.00
  -1   6  -4  547.43   53.12
  -1   6  -4  479.55   38.98
  -1   6  -4  472.13   36.92
  -1   6  -4  493.72   42.22
   1   6   4  460.85   29.15
  -1   6  -4  434.49   27.97
   1  -6  -4  461.36   44.43
   1  -6  -4  437.41   37.92
  -1  -6   4  484.08   49.42
   1   7  -4  123.02   11.54
  -1   7   4  148.10   20.49
  -1   7   4  118.61   12.11
   1   7  -4  128.66   22.06
   1   7  -4  125.44   15.44
   1   7  -4  138.62   14.54
   1   7  -4  144.88    7.59
   1   7  -4  134.33    7.42
  -1   7   4   81.90   12.52
   1   7  -4  136.76   16.07
  -1   7   4  136.09    8.71
  -1   7   4  129.16   11.13
   1   7  -4  144.63   13.06
   1  -7   4  135.70    6.64
  -1  -7  -4  169.40   17.28
   1  -7   4  132.21   15.72
  -1  -7  -4  143.15   11.31
  -1  -7  -4  175.03   20.41
  -1  -7  -4  144.27   18.17
  -1  -7  -4  143.31    9.64
   1  -7   4  109.95   16.78
  -1  -7  -4  133.46    9.83
   1  -7  -4  145.88   15.94
   1  -7  -4  135.55   17.64
   1  -7  -4  161.35    8.50
   1  -7  -4  137.29   16.00
  -1  -7   4  136.52   12.76
  -1  -7   4  142.35   27.70
   1  -7  -4  138.62    8.81
  -1  -7   4  143.15   20.16
  -1  -7   4  142.22   13.64
  -1  -7   4   90.43   19.34
  -1  -7   4  126.63   10.58
   1  -7  -4  138.70   14.65
   1  -7  -4  175.41   19.49
   1  -7  -4  150.11    9.23
   1   7   4  127.63    7.26
  -1  -7   4  171.63   13.69
   1   7   4  123.23   13.26
  -1   7  -4  148.02   14.30
  -1   7  -4  133.30    7.94
  -1   7  -4  139.33   17.94
  -1   7  -4  158.37   20.02
  -1   7  -4  147.63   15.71
  -1   7  -4  140.48   12.43
  -1   8   4 1046.71   87.42
  -1   8   4  632.22   67.20
   1   8  -4 1025.40   91.22
  -1   8   4 1038.37  108.19
   1   8  -4  925.83   90.49
   1   8  -4 1000.05   97.25
   1   8  -4  954.63   85.67
   1   8  -4 1001.04   78.67
   1   8  -4  923.55   87.46
   1   8  -4  983.87   78.96
   1   8  -4  932.22   90.09
  -1   8   4  908.81   80.32
  -1  -8  -4 1066.73  103.53
  -1  -8  -4  948.33   80.53
   1  -8   4  801.40   85.11
  -1  -8  -4 1195.86  110.52
  -1  -8  -4 1003.55   85.95
  -1  -8  -4 1109.34   90.21
  -1  -8  -4 1254.23  119.49
   1  -8   4  941.81   91.42
  -1   8   4  866.52   80.59
   1  -8  -4  998.84   95.05
   1  -8  -4 1042.80   95.56
   1  -8  -4 1011.18   82.50
   1  -8  -4 1102.18  106.99
  -1  -8   4 1305.63  111.49
  -1  -8   4  642.44   79.94
   1  -8  -4  963.16   96.13
   1  -8  -4 1246.52  117.29
   1  -8  -4 1010.85   81.71
   1  -8  -4 1010.68   96.17
  -1  -8   4  926.62   89.41
  -1  -8   4 1036.25  122.20
  -1   8  -4  908.29   74.41
   1   8   4  879.80   70.94
  -1   8  -4  985.12   98.04
  -1   8  -4 1020.97   91.06
  -1   8  -4  957.72   74.31
  -1   8  -4  999.55   94.30
   1   8   4  861.99   81.80
  -1   8  -4 1012.09   93.51
  -1  -8   4 1014.25   90.85
  -1  -8   4 1036.61  106.51
  -1  -8   4  978.06   88.80
  -1   9   4  290.90   25.61
  -1   9   4  348.68   24.10
  -1   9   4  222.56   24.11
   1   9  -4  324.67   25.52
  -1  -9  -4  317.52   25.90
   1   9  -4  312.64   29.16
   1   9  -4  312.63   29.91
   1   9  -4  323.68   19.69
   1   9  -4  311.50   28.28
   1   9  -4  309.17   28.36
  -1   9   4  302.51   22.60
  -1   9   4  347.15   37.58
  -1   9   4  333.72   61.43
   1  -9   4  323.38   30.14
  -1  -9  -4  393.11   24.60
   1  -9   4  269.30   29.85
  -1  -9  -4  387.33   34.24
  -1  -9  -4  419.74   38.63
  -1  -9  -4  325.39   23.19
   1  -9   4  330.43   39.44
  -1  -9  -4  347.93   33.29
   1   9  -4  325.24   20.18
   1   9  -4  338.61   26.40
   1  -9  -4  351.91   32.24
   1  -9  -4  382.32   31.66
   1  -9  -4  323.26   29.62
   1  -9  -4  365.05   22.31
   1  -9  -4  424.35   35.83
  -1  -9   4  325.95   25.95
  -1  -9   4  313.31   23.65
  -1  -9   4  233.04   33.08
  -1  -9   4  348.54   27.39
   1  -9  -4  361.84   21.52
   1  -9  -4  324.94   31.71
   1  -9  -4  340.29   30.92
  -1  -9   4  351.60   36.52
  -1  -9   4  364.00   47.54
  -1   9  -4  327.38   29.33
  -1   9  -4  328.72   19.06
   1   9   4  275.06   17.67
  -1   9  -4  339.66   29.48
  -1   9  -4  285.48   18.86
   1   9   4  288.49   25.69
  -1   9  -4  333.74   33.06
  -1   9  -4  344.44   27.32
   1   9   4  289.54   23.06
  -1   9  -4  289.50   17.26
   1  10  -4  233.36   14.00
  -1  10   4  216.34   19.51
  -1  10   4  248.96   17.47
  -1  10   4  249.66   29.98
   1  10  -4  225.70   17.92
   1  10  -4  224.18   21.51
   1  10  -4  235.43   23.22
   1  10  -4  232.25   14.01
  -1  10   4  220.07   15.57
  -1  10   4  170.09   19.59
  -1  10   4  222.10   50.67
   1  10  -4  226.98   21.84
   1  10  -4  251.81   19.24
   1 -10   4  240.02   29.43
  -1 -10  -4  240.77   16.46
  -1 -10  -4  252.82   17.42
  -1 -10  -4  283.66   26.41
   1 -10   4  249.67   23.22
   1 -10   4  203.33   23.57
  -1 -10  -4  320.96   30.43
  -1 -10  -4  255.90   25.35
   1  10  -4  228.92   21.65
   1 -10  -4  259.55   24.27
   1 -10  -4  314.13   26.53
   1 -10  -4  296.38   24.66
   1 -10  -4  230.92   12.71
   1 -10  -4  252.10   14.73
  -1 -10   4  243.22   18.98
  -1 -10   4  184.90   26.91
  -1 -10   4  272.62   20.82
   1 -10  -4  274.35   24.78
   1 -10  -4  245.72   22.65
   1 -10  -4  239.86   24.49
   1 -10  -4  251.28   23.83
  -1 -10   4  228.27   17.24
  -1 -10   4  265.81   28.79
  -1 -10   4  285.80   38.69
  -1  10  -4  243.69   19.92
   1  10   4  185.27   12.10
  -1  10  -4  209.95   12.46
  -1  10  -4  247.66   22.40
  -1  10  -4  251.52   22.98
  -1  10  -4  227.30   12.73
   1  10   4  212.95   17.94
  -1  10  -4  221.08   17.10
  -1  10  -4  245.66   25.68
   1  10   4  207.67   19.10
  -1  11   4   32.53    5.89
  -1  11   4   34.96   10.09
  -1  11   4   32.33    3.59
  -1  11   4   34.79    4.21
   1  11  -4   33.45    7.00
   1  11  -4   30.98    7.46
   1  11  -4   33.07    2.60
   1  11  -4   31.92    4.20
  -1  11   4   30.40   21.13
  -1  11   4   21.76    9.73
   1  11  -4   34.02    6.18
   1  11  -4   34.09    7.10
   1 -11   4   30.57    8.31
  -1 -11  -4   32.06    3.76
  -1 -11  -4   41.07    8.41
   1 -11   4   36.48    7.06
  -1 -11  -4   44.88    9.72
   1 -11   4   35.83    9.65
  -1 -11  -4   34.42    8.02
  -1 -11  -4   36.55    2.81
  -1 -11  -4   36.77    5.91
   1  11  -4   28.52    5.80
   1  11  -4   37.07    4.95
  -1 -11   4   39.38    9.89
   1 -11  -4   30.86    7.98
   1 -11  -4   46.76    7.37
   1 -11  -4   37.80    7.62
  -1 -11   4   26.72    7.94
  -1 -11   4   35.53    4.80
  -1 -11   4   31.15   10.26
  -1 -11   4   32.31    4.47
   1 -11  -4   38.90    7.26
   1 -11  -4   39.86    7.16
   1 -11  -4   32.24    6.84
  -1 -11   4   40.19    5.42
   1  11   4   25.87    2.60
  -1  11  -4   36.00    8.09
  -1  11  -4   37.70    7.22
   1  11   4   25.45    5.66
  -1  11  -4   31.20    2.10
  -1  11  -4   29.65    3.05
  -1  11  -4   31.87    6.63
   1  11   4   28.10    5.04
  -1  11  -4   32.27    5.38
   1  11   4   28.52    5.37
   1 -11  -4   39.41    7.42
  -1  12   4  139.18   10.90
  -1  12   4  142.44   21.44
  -1  12   4  125.32   13.21
  -1  12   4  128.42   38.34
  -1  12   4   93.05   11.02
   1  12  -4  164.96   10.68
   1  12  -4  141.10   15.26
   1  12  -4  138.10   10.19
   1  12  -4  122.50   13.35
  -1  12   4  130.17    9.48
   1  12  -4  132.55   13.90
   1  12  -4  122.48   10.39
   1  12  -4  147.27   11.25
  -1 -12  -4  161.54    9.10
   1 -12   4  125.54   16.84
  -1 -12  -4  167.13   18.10
  -1 -12  -4  147.72   10.58
  -1 -12  -4  149.19   16.69
   1 -12   4  151.98   15.07
  -1 -12  -4  195.78   20.57
  -1 -12  -4  160.58   14.10
   1 -12   4  155.27   18.85
   1 -12   4  145.81   16.43
   1 -12  -4  148.89   16.25
   1 -12  -4  189.71   16.78
   1 -12  -4  144.96   16.78
   1 -12  -4  157.08   15.60
  -1 -12   4  152.61   29.54
  -1 -12   4  169.48   13.31
  -1 -12   4  121.69   16.03
   1 -12  -4  140.27   14.73
   1 -12  -4  167.99   16.10
   1 -12  -4  196.06   16.76
  -1 -12   4  150.17   11.73
  -1 -12   4  140.79   11.22
  -1  12  -4  138.70   12.89
  -1  12  -4  125.70    7.08
  -1  12  -4  138.63   14.71
  -1  12  -4  254.59   31.00
  -1  12  -4  142.01   15.47
   1  12   4  105.07   12.26
   1  12   4  134.92   13.56
   1  12   4  119.36   12.15
  -1  12  -4  125.09    8.91
   1  13  -4   32.91    4.37
  -1  13   4   35.86    6.60
  -1  13   4   26.64    5.50
  -1  13   4   37.40    4.70
   1  13  -4   39.97    7.63
   1  13  -4   36.70    6.50
   1  13  -4   42.72    4.25
   1  13  -4   32.87    6.77
   1  13  -4   35.92    2.80
  -1  13   4   34.38    3.53
  -1  13   4   39.19   22.57
  -1  13   4   37.52   10.93
   1  13  -4   38.50    4.42
   1 -13   4   45.35    8.87
  -1 -13  -4   45.70    9.13
   1 -13   4   41.37    8.48
  -1 -13  -4   41.84    3.05
  -1 -13  -4   46.35    6.34
  -1 -13  -4   42.16    8.31
   1 -13   4   43.91    7.12
  -1 -13  -4   39.47    4.12
  -1 -13  -4   54.93   16.26
  -1 -13   4   34.03    8.34
   1 -13  -4   43.72    7.09
  -1 -13   4   39.24    4.76
  -1 -13   4   40.58    4.70
  -1 -13   4   51.98    9.87
   1 -13  -4   52.37    7.75
   1 -13  -4   56.60    7.20
   1 -13  -4   37.90    6.92
   1 -13  -4   42.74    8.17
  -1  13  -4   38.04    5.92
  -1  13  -4   32.66    3.66
   1  13   4   32.83    5.91
  -1  13  -4   37.08    6.98
   1  13   4   37.00    6.14
  -1  13  -4   33.74    2.42
   1  13   4   28.65    6.09
  -1  13  -4   41.25    7.89
   1  13   4   34.73    6.20
  -1 -13   4   39.76    9.26
   1  14  -4    0.70    0.80
  -1  14   4    0.62    2.30
  -1  14   4    1.62    3.97
   1  14  -4    1.26    2.54
   1  14  -4    1.63    2.22
   1  14  -4    1.17    1.30
   1  14  -4    1.21    1.26
  -1  14   4   -0.80    8.68
  -1  14   4    0.68    0.92
  -1  14   4    1.64    1.55
   1  14  -4    1.91    1.37
   1  14  -4    1.08    2.28
  -1 -14  -4    2.04    3.31
  -1 -14  -4    1.01    4.62
  -1 -14  -4    1.08    1.12
  -1 -14  -4    0.97    1.25
   1 -14   4    1.49    3.10
  -1 -14  -4    0.51    4.46
  -1 -14  -4    1.21    1.14
  -1 -14  -4    0.83    0.82
   1 -14   4    0.74    2.39
   1 -14   4    1.00    2.89
  -1  14   4    1.10    1.97
   1 -14  -4    1.75    2.93
   1 -14  -4    1.05    2.12
  -1 -14   4    1.50    1.41
  -1 -14   4    1.45    3.03
  -1 -14   4    0.46    3.28
   1 -14  -4    1.63    2.21
   1 -14  -4    1.35    2.34
   1 -14  -4    0.95    2.30
  -1 -14   4    1.35    1.62
  -1  14  -4    0.75    1.14
   1  14   4    0.54    2.01
  -1  14  -4    0.63    2.72
  -1  14  -4    0.83    2.38
   1  14   4    1.32    2.12
   1  14   4    1.28    1.37
   1  14   4    1.07    1.91
  -1  14  -4    2.18    3.54
  -1  14  -4    0.62    0.64
  -1 -14   4    1.20    1.50
   1  15  -4   39.46    4.80
  -1  15   4   49.18    6.01
  -1  15   4   46.09   26.36
   1  15  -4   48.74    7.50
   1  15  -4   49.37    7.91
   1  15  -4   53.34    5.37
   1  15  -4   49.66    8.73
   1  15  -4   46.34    3.64
  -1  15   4   52.44    6.42
  -1  15   4   46.13    8.08
  -1  15   4   36.23    6.12
  -1  15   4   49.38   12.73
   1 -15   4   48.01   10.02
  -1 -15  -4   63.81   10.97
  -1 -15  -4   59.76    4.01
  -1 -15  -4   57.11    4.38
  -1 -15  -4   51.48    5.04
  -1 -15  -4   59.25    4.51
   1 -15   4   55.48   10.26
   1 -15   4   57.30    8.09
   1 -15   4   41.58    5.31
  -1 -15  -4   53.21    8.43
  -1 -15  -4   60.27   13.89
   1  15  -4   45.53    4.50
   1 -15  -4   50.80    7.68
   1 -15  -4   57.50    9.77
   1 -15  -4   58.42    7.79
  -1 -15   4   52.46    5.71
  -1 -15   4   56.35    5.95
  -1 -15   4   55.69   10.65
  -1 -15   4   55.61    5.09
  -1  15  -4   41.70    3.03
  -1  15  -4   55.98    8.54
   1 -15  -4   79.31    7.87
   1 -15  -4   68.95   16.61
   1 -15  -4   57.18    7.16
  -1  15  -4   54.34    9.31
  -1  15  -4   52.27    7.42
   1  15   4   44.17    6.70
  -1  15  -4   49.43    9.12
   1  15   4   37.99    6.83
   1  15   4   42.58    7.45
  -1  15  -4   43.75    4.72
   1  15   4   41.22    5.06
  -1 -15   4   55.22    9.93
  -1  16   4   15.03   18.51
  -1  16   4   13.50    2.20
  -1  16   4   14.07    4.00
  -1  16   4   16.56    5.25
   1  16  -4   17.71    3.29
   1  16  -4   14.97    2.49
   1  16  -4   17.59    5.08
   1  16  -4   12.13    2.88
  -1  16   4   16.74    8.76
  -1  16   4   16.72    3.83
   1  16  -4   17.49    5.64
   1 -16   4   15.88    3.26
  -1 -16  -4   19.92    3.24
  -1 -16  -4   17.14    2.87
   1 -16   4   22.01    4.97
  -1 -16  -4   24.44    7.26
  -1 -16  -4   16.06    5.06
  -1 -16  -4   20.23    5.54
   1 -16   4   18.03    6.77
   1 -16   4   15.57   11.46
   1  16  -4   15.09    2.07
   1  16  -4   16.06    4.70
   1 -16  -4   17.10    4.81
   1 -16  -4   26.69    4.59
   1 -16  -4   25.03   10.14
  -1 -16   4   21.11    3.67
  -1 -16   4   19.31    7.21
  -1 -16   4   18.32    2.81
  -1 -16   4   18.67    3.38
   1 -16  -4   19.80    4.70
   1 -16  -4   21.06    4.51
   1 -16  -4   21.09    6.51
  -1 -16   4   21.07    6.47
  -1  16  -4   15.27    2.91
  -1  16  -4   18.68    5.79
   1  16   4   15.50    3.29
  -1  16  -4   14.60    1.72
  -1  16  -4   18.03    4.70
   1  16   4   12.55    3.95
   1  16   4   13.79    4.55
   1  16   4   16.60    4.89
  -1  16  -4   17.67    6.06
  -1  16  -4   18.44    5.16
  -1  17   4    7.22    3.08
  -1  17   4    4.89   15.23
   1  17  -4    8.87    2.71
   1  17  -4    7.46    1.57
   1  17  -4    9.55    4.63
   1  17  -4    5.22    2.32
   1  17  -4   10.01    3.66
  -1  17   4    6.27    1.58
   1  17  -4    6.43    2.85
  -1  17   4    7.21    7.04
  -1  17   4    6.33    3.16
   1  17  -4    7.66    3.87
   1 -17   4   11.31    5.89
  -1 -17  -4    7.12    3.92
  -1 -17  -4    8.41    4.38
  -1 -17  -4   11.06    5.60
   1 -17   4    9.39    5.41
   1 -17   4    7.25    2.45
   1 -17   4    7.33    3.81
   1 -17  -4   10.12    3.55
   1 -17  -4   11.08    3.59
   1 -17  -4    8.85    5.09
   1 -17  -4    6.38    3.67
  -1 -17   4    9.21    2.03
  -1 -17   4   10.60    2.88
  -1 -17   4    5.77    2.63
  -1 -17   4   10.05    5.80
  -1 -17   4   11.52    4.99
   1 -17  -4   11.40    3.30
   1 -17  -4    8.09    4.55
   1  17   4    6.60    2.64
  -1  17  -4    7.00    3.72
  -1  17  -4    7.84    3.91
   1  17   4    8.75    3.92
   1  17   4    6.50    3.68
   1  17   4    6.58    3.04
  -1  17  -4    4.03    2.29
  -1  17  -4    6.97    4.51
  -1  17  -4    6.13    1.30
  -1  17  -4    9.16    4.87
   1  18  -4   74.32    7.91
  -1  18   4   74.86    8.88
   1  18  -4   70.75    9.68
   1  18  -4   71.57    9.81
   1  18  -4   70.65   10.77
   1  18  -4   71.61    5.56
  -1  18   4   67.60   16.14
  -1  18   4   66.87   32.73
  -1 -18  -4   79.67   10.93
   1 -18   4   89.89   10.58
  -1 -18  -4   86.45   13.64
  -1 -18  -4   86.37   16.53
   1 -18   4   84.12    7.70
   1 -18  -4   73.70   10.98
   1 -18  -4   81.74   13.05
  -1 -18   4   83.69    8.14
   1 -18  -4   79.04   12.34
   1 -18  -4   75.00    9.58
  -1 -18   4   98.09    8.92
  -1 -18   4   97.23   12.51
  -1  18  -4   65.89   10.96
   1  18   4   65.72    8.42
  -1  18  -4   73.79   11.72
  -1  18  -4   73.07   10.01
  -1  18  -4   81.90   10.72
  -1  18  -4   64.35    6.96
   1  18   4   58.89    7.42
  -1  18  -4   60.81    4.59
   1  18   4   66.16   10.98
  -1  19   4    2.72    2.38
   1  19  -4    1.55    1.20
   1  19  -4    1.93    2.67
  -1  19   4    1.76    5.12
   1  19  -4    2.62    2.16
  -1 -19  -4    3.91    4.09
  -1 -19  -4    2.55    4.93
  -1 -19  -4    2.22    3.03
   1  19  -4    2.05    3.22
  -1  19   4    1.85   11.10
   1 -19  -4    1.88    3.24
   1 -19  -4    3.20    3.62
  -1 -19   4    2.60    2.04
  -1 -19   4   -0.47    1.55
  -1 -19   4    1.58    1.84
   1 -19  -4    2.21    2.39
  -1 -19   4    3.75    3.41
  -1  19  -4    1.84    2.72
  -1  19  -4    1.28    1.57
   1  19   4    2.67    3.04
   1  19   4    1.38    2.09
  -1  19  -4    1.63    1.76
  -1  19  -4    2.71    3.47
  -1  19  -4    2.00    2.67
  -1  20   4   78.41    9.87
   1  20  -4   78.24   11.79
  -1  20   4   72.85   35.99
   1  20  -4   76.38   10.64
   1  20  -4   78.53    9.09
   1  20  -4   77.79    6.30
  -1 -20  -4  114.94   22.49
  -1 -20  -4   97.97   15.00
  -1 -20  -4   84.32   11.67
  -1  20   4   78.16   18.52
   1 -20  -4   87.55   13.64
   1 -20  -4   81.94   12.35
  -1 -20   4   91.16    8.98
  -1 -20   4   84.22    7.60
   1 -20  -4   83.37   10.46
  -1 -20   4   89.74   15.78
  -1 -20   4  101.21    9.50
  -1  20  -4   80.17   10.42
   1  20   4   61.55    8.19
  -1  20  -4   76.04   12.67
  -1  20  -4   73.06   11.01
  -1  20  -4   68.93    7.98
  -1  20  -4   69.20    5.75
   1  20   4   65.02   11.86
   1  21  -4   28.74    6.93
   1  21  -4   28.54    5.89
  -1  21   4   23.24   25.57
  -1  21   4   27.87    6.09
  -1  21   4   29.39   12.26
  -1 -21  -4   41.62    9.18
   1  21  -4   29.89    7.70
  -1 -21  -4   30.58    7.33
   1 -21  -4   29.27    6.13
   1 -21  -4   29.62    7.88
  -1 -21   4   33.79    6.43
  -1 -21   4   35.71    5.50
   1 -21  -4   33.24    8.85
  -1 -21   4   43.92    4.89
  -1  21  -4   28.87    6.18
   1  21   4   20.38    7.75
   1  21   4   22.82    5.35
  -1  21  -4   24.16    5.08
  -1  21  -4   27.94    6.98
  -1  21  -4   28.28    8.34
  -1  22   4   10.77   20.14
   1  22  -4   11.76    4.74
   1  22  -4   16.48    5.97
  -1  22   4   14.35    4.92
   1  22  -4   13.84    5.25
  -1  22   4   16.34    9.73
  -1 -22  -4   15.38    5.66
  -1 -22  -4   23.11    6.91
   1 -22  -4   14.31    5.93
  -1 -22   4   14.93    4.55
   1 -22  -4   13.76    4.26
   1 -22  -4   16.80    7.01
  -1  22  -4   15.51    4.72
   1  22   4   15.57    4.47
  -1  22  -4   10.19    3.95
  -1  22  -4   17.43    6.38
  -1  22  -4   13.47    5.47
   1  22   4   16.55    6.04
   1  23  -4   17.57    6.18
   1  23  -4   19.22    5.42
  -1  23   4   20.06   10.29
  -1 -23  -4   22.31    7.23
  -1 -23  -4   19.84    5.96
   1 -23   4   16.06    5.77
  -1  23   4   14.32   21.07
   1 -23  -4   18.45    7.22
   1 -23  -4   14.18    4.31
   1 -23  -4   18.63    6.25
  -1  23  -4   18.55    6.56
   1  23   4   16.52    6.43
  -1  23  -4    1.01    4.52
  -1  23  -4   12.94    4.13
  -1  23  -4   15.46    5.51
  -1 -23   4   17.53    4.62
   1  24  -4   19.51    6.72
  -1  24   4   22.52   10.80
   1  24  -4   16.98    5.88
   1  24  -4   15.51    5.63
   1  24  -4   21.53    5.55
  -1 -24  -4   21.87    6.25
  -1 -24  -4   21.41    7.27
   1 -24   4   18.09    6.34
   1 -24  -4   21.09    6.64
  -1 -24   4   22.37    4.79
   1 -24  -4   18.85    7.83
   1 -24  -4   13.38    4.60
   1  24   4   15.13    6.93
  -1  24  -4   15.75    4.87
  -1  24  -4   15.50    4.55
  -1  24  -4   15.78    6.95
   1  24   4    3.75   19.68
   1  25  -4    6.73    4.41
   1  25  -4    7.30    4.12
   1  25  -4    6.98    4.99
  -1  25   4   10.40    8.27
  -1 -25  -4   11.40    5.21
  -1 -25  -4    7.97    4.64
   1 -25   4    7.48    4.63
   1  25  -4    7.09    4.22
   1 -25  -4    8.25    4.93
  -1 -25   4   10.80    3.50
   1 -25  -4    5.88    3.22
   1 -25  -4    8.42    6.00
  -1  25  -4    3.89    3.42
  -1  25  -4    8.51    5.18
   1  25   4    6.52    5.33
   1  25   4    8.25   15.88
  -1  25  -4    8.50    3.37
   1  26  -4   17.22    5.80
  -1  26   4   19.68    5.74
  -1  26   4   22.41   11.43
   1  26  -4   19.40    6.06
   1  26  -4   20.72    5.89
  -1 -26  -4   21.45    6.22
  -1 -26  -4   22.16    7.02
   1 -26   4   36.71    7.35
   1  26  -4   21.76   11.96
   1 -26  -4   18.76   11.12
   1 -26  -4   22.18    8.29
  -1 -26   4   22.90    4.79
   1  26   4    9.85   20.40
   1  26   4   17.61    7.43
  -1  26  -4   19.89    4.80
   1  26   4   16.13    6.17
  -1  26  -4   51.04   15.69
  -1  26  -4   14.26    4.79
  -1  26  -4   22.32    7.01
  -1  27   4   17.64    5.67
  -1  27   4   13.04   12.93
   1  27  -4   17.53    5.58
  -1 -27  -4   24.03    6.41
   1 -27   4   44.41    7.26
  -1 -27  -4   21.49    6.22
   1  27  -4   16.05    5.76
   1  27  -4   20.23    5.62
   1  27  -4   24.56    6.23
   1 -27  -4   24.64    7.66
   1 -27  -4   18.09   11.61
  -1  27  -4   16.25    4.26
  -1  27  -4   19.94    7.02
   1  27   4    9.94   18.30
   1  27   4   18.19    7.13
  -1  27  -4   12.92    4.71
  -1  27  -4   20.43    6.77
   1  27   4   18.49    5.96
  -1 -27   4   20.03    4.47
  -1  28   4   20.02    6.05
  -1  28   4   16.86   13.27
   1  28  -4   24.76    5.95
   1  28  -4   27.72    6.18
   1 -28   4   55.05    7.87
  -1 -28  -4   25.18   10.65
   1  28  -4   20.53    5.79
   1  28  -4   18.31    6.18
  -1 -28  -4   25.53    6.85
   1 -28  -4   26.16    7.55
   1 -28  -4   26.11    8.14
  -1 -28   4   26.54    5.08
  -1  28  -4   22.31    7.54
   1  28   4    8.26   18.15
  -1  28  -4   25.06   10.93
   1  28   4   19.61    6.30
   1  28   4   16.48    7.55
  -1  28  -4   14.50    5.16
  -1  29   4   -0.28    3.00
  -1  29   4    4.49    6.50
   1  29  -4    4.04    3.00
   1  29  -4    3.66    3.00
  -1 -29  -4    4.24    3.10
  -1 -29  -4    4.63    4.00
   1  29  -4    1.66    3.10
   1  29  -4    4.39    3.38
   1 -29  -4    3.16    4.43
   1  29   4   -0.39    9.59
  -1  29  -4    3.03    3.67
  -1  29  -4    4.52    4.16
  -1  29  -4    1.16    2.72
   1  29   4    3.05    3.99
   1  29   4   -0.41    3.33
  -1 -29   4    3.67    2.01
   1 -29  -4    4.47    3.91
  -1  30   4    1.28    2.47
  -1  30   4   -0.16    4.96
  -1  30   4    0.45    5.26
   1  30  -4   -0.01    2.92
   1  30  -4    0.51    2.63
  -1 -30  -4    1.42    2.30
  -1 -30  -4    0.01    3.39
   1  30  -4    0.08    4.22
   1  30  -4   -0.01    2.43
  -1 -30   4    1.68    1.51
   1 -30  -4    0.00    3.75
   1  30   4    4.35    3.10
   1  30   4    0.95    7.96
  -1  30  -4    1.43    3.49
   1  30   4    1.01    2.70
  -1  30  -4    0.43    2.29
  -1  30  -4    0.86    2.93
   1 -30  -4    3.04    3.71
  -1  31   4    0.17    7.01
  -1  31   4    5.05    3.33
  -1  31   4   -0.21    6.33
   1  31  -4    0.13    3.06
   1 -31   4    0.17    3.92
   1  31  -4    2.57    3.37
  -1 -31  -4    0.37    4.51
   1  31  -4   -0.32    3.87
   1  31  -4    0.33    3.85
   1 -31  -4   11.09    4.97
   1 -31  -4    0.09    5.00
  -1  31  -4    7.46    3.71
   1  31   4    2.51    3.60
  -1  31  -4    8.54    4.58
   1  31   4    8.87    4.09
   1  31   4   -0.91   11.17
  -1  31  -4    1.67    3.05
  -1  32   4   -0.82    7.23
  -1  32   4    5.87    3.60
  -1  32   4    0.63    7.05
   1  32  -4   -0.22    4.21
   1  32  -4   -0.01    3.00
   1  32  -4   -0.16    4.17
  -1 -32  -4   -0.22    4.93
   1 -32   4    0.13    4.31
   1  32  -4    0.34    3.60
   1 -32  -4   18.18    5.42
   1 -32  -4   -0.11    5.42
  -1  32  -4    6.52    5.06
  -1  32  -4   14.22    3.88
   1  32   4    4.77    3.92
  -1  32  -4   -0.47    3.43
   1  32   4    1.35   11.65
   1  32   4    9.47    4.50
  -1  33   4   -0.13    1.97
  -1  33   4   -0.46    4.25
   1 -33   4   -0.07    2.58
   1  33  -4   -0.07    1.57
   1  33  -4   -0.08    2.50
  -1 -33  -4   -0.58    2.88
   1  33  -4    0.05    2.49
   1  33  -4   -0.61    2.05
   1 -33  -4    2.09    3.17
   1 -33  -4   -0.21    3.43
  -1  33  -4   -0.18    2.28
   1  33   4   -0.16    2.67
   1  33   4    0.33    6.75
  -1  33  -4   -0.84    1.82
  -1  33  -4    0.14    3.01
   1  33   4    0.32    2.17
  -1  34   4    0.28    2.05
   1  34  -4    0.20    2.51
  -1 -34  -4   -0.59    2.89
   1 -34   4   -0.11    2.63
   1  34  -4   -0.43    5.76
   1  34  -4    0.17    1.50
   1 -34  -4   -0.11    4.30
   1 -34  -4   -1.89    3.12
   1  34   4   -0.45    2.16
   1  34   4    0.41    6.43
  -1  34  -4    0.42    3.74
  -1  34  -4   -0.04    2.16
   1  35  -4   -1.08    1.74
   1  35  -4   -0.29    1.45
   1 -35   4   -0.38    2.58
  -1 -35  -4    3.46    2.81
   1  35  -4   -0.32    3.12
   1  35  -4    0.21    2.43
   1 -35  -4   -0.18    4.26
   1 -35  -4    1.84    3.06
  -1  35  -4    0.42    3.62
   1  35   4   -1.78    3.46
   1  35   4   10.27    7.47
  -1  35  -4   -0.08    1.95
  -1  35  -4    0.01    1.60
  -1  36   4    0.29    6.05
   1  36  -4   -2.03    3.76
  -1 -36  -4   -0.72    3.37
   1 -36   4    9.09    3.62
   1  36  -4    0.16    2.18
   1  36  -4    0.00    3.29
   1 -36  -4    0.42    5.75
   1 -36  -4   -0.24    3.68
  -1  36  -4    0.42    2.55
  -1  36  -4    1.03    2.12
   1  36   4   -4.76    5.14
   1  36   4    0.61    4.74
  -1  36  -4    0.38    4.81
  -1  37   4   -1.67    7.26
  -1  37   4   -2.21    2.80
  -1 -37  -4   11.29    3.63
   1  37  -4    1.99    3.96
   1  37  -4    1.16    2.13
   1 -37   4    4.41    3.92
   1 -37  -4   -0.78    3.85
   1 -37  -4   -2.05    6.50
  -1  37  -4    0.58    2.17
   1  37   4   -5.20    4.58
   1  37   4   -1.70    5.30
   1  37   4    0.88    2.96
  -1  38   4   -3.43    8.47
  -1 -38  -4   -6.09    3.24
   1  38  -4    0.01    4.60
   1  38  -4    0.00    3.45
   1 -38   4    0.96    4.74
   1 -38  -4    1.00    7.51
   1 -38  -4    0.79    4.31
   1  38   4   -4.01    5.42
  -1  39   4   -1.46   12.33
   1 -39   4   10.79   11.04
   1 -39  -4    9.38   10.44
  -1   0   5  242.98   29.75
  -1   0  -5  236.84   17.49
  -1   0  -5  231.04   26.65
  -1   0  -5  283.31   32.73
  -1   0   5  214.04   26.66
  -1   0   5  204.86   17.19
   1   0  -5  221.08   24.81
   1   0   5  194.20   23.18
  -1   0  -5  224.12   14.97
   1   0  -5  231.72   18.26
   1   0  -5  227.04   21.06
  -1   0   5  218.36   23.97
  -1   0   5  198.82   21.68
   1   0  -5  242.49   17.82
  -1   0  -5  236.88   21.30
   1   0   5  263.10   29.54
   1   0  -5  236.03   22.87
  -1   1   5  143.14   18.36
   1   1  -5  154.89   12.55
  -1   1   5  140.96   16.42
   1   1  -5  161.81   19.78
  -1  -1  -5  158.85   15.28
  -1  -1  -5  192.48   25.60
   1   1  -5  155.37   15.34
  -1   1   5  136.02   12.90
   1  -1   5  155.20   19.51
  -1  -1  -5  148.17    9.71
   1   1  -5  147.65   12.94
  -1  -1  -5  152.41   11.68
   1  -1   5  128.20   18.53
  -1   1   5  159.86   24.11
   1   1  -5  162.78   16.99
  -1  -1  -5  166.32   20.93
  -1  -1   5  147.80   20.30
   1  -1  -5  153.51   16.82
   1  -1  -5  154.78   12.31
  -1   1  -5  158.81   12.75
  -1   1  -5  189.30   24.99
  -1   1  -5  158.47   16.06
  -1   1  -5  161.52   21.93
  -1   1  -5  152.85   10.87
  -1  -1   5  165.83   21.24
   1  -1  -5  158.52   11.75
   1  -1  -5  151.81   19.34
  -1  -1   5  151.72   34.11
  -1  -1   5  139.39   12.06
  -1  -1   5  124.28   16.56
  -1  -1   5  151.88   17.88
   1  -1  -5  158.33   16.10
   1   1   5  142.06   18.48
   1   2  -5  743.28   65.05
   1   2  -5  708.08   57.75
  -1  -2  -5  654.03   48.22
  -1   2   5  659.97   64.74
  -1  -2  -5  713.10   60.81
  -1   2   5  545.81   71.78
  -1  -2  -5  683.03   53.48
   1  -2   5  562.48   57.68
  -1  -2  -5  710.33   87.28
  -1  -2  -5  691.55   67.19
   1  -2   5  656.59   64.60
   1   2  -5  663.60   63.67
  -1   2   5  530.42   48.49
   1   2  -5  692.05   60.44
   1   2  -5  668.75   57.25
  -1   2   5  677.66   76.79
  -1   2   5  621.55   53.31
   1  -2  -5  652.70   63.53
  -1  -2   5  625.96   63.72
  -1   2  -5  713.10   70.85
  -1  -2   5  805.52   77.50
   1  -2  -5  723.19   55.98
   1  -2  -5  646.78   51.83
   1   2   5  538.23   48.88
   1  -2  -5  722.23   64.18
  -1   2  -5  738.25   64.66
  -1  -2   5  504.22   52.66
  -1   2  -5  764.59   61.23
   1  -2  -5  686.69   62.68
  -1  -2   5  690.33   64.63
  -1  -2   5  679.05   56.60
  -1  -2   5  664.89   91.16
   1  -2  -5  518.87   65.55
   1  -2  -5  586.76   68.49
   1   2   5  605.70   59.13
  -1   2  -5  842.38   83.16
  -1   2  -5  714.78   55.80
  -1   3   5  108.11   11.06
  -1   3   5  212.51   18.65
   1   3  -5  130.13   13.25
   1  -3   5  107.18   22.99
  -1   3   5  113.22   16.06
   1   3  -5  125.08   11.40
   1   3  -5  134.17   16.26
  -1  -3  -5  128.66    7.47
  -1  -3  -5  126.75   12.34
   1  -3   5   99.65   15.50
  -1  -3  -5  130.97   17.60
  -1  -3  -5  126.59   16.96
  -1  -3  -5  115.29    8.80
   1   3  -5  131.09   14.18
   1   3  -5  118.54   11.89
  -1   3   5   99.14   11.01
  -1   3   5  114.85   23.52
   1  -3  -5  115.85   16.46
   1  -3  -5  115.82    8.85
  -1  -3   5   81.70   14.11
  -1   3  -5  135.87   11.68
   1  -3  -5  120.24   14.72
  -1  -3   5  115.48   26.78
  -1  -3   5  125.01   11.30
  -1   3  -5  133.54   18.56
  -1   3  -5  149.90   21.49
   1   3   5  113.08   15.34
   1   3   5   94.25   10.67
  -1   3  -5  127.28   10.38
  -1   3  -5  124.70   14.10
  -1  -3   5  113.87   29.82
  -1  -3   5  120.38   14.85
   1  -3  -5  142.51   21.82
   1  -3  -5  126.21   14.55
  -1  -3   5  144.04   17.15
   1  -3  -5  123.34    8.84
   1   4  -5  167.36   15.34
  -1   4   5  179.54   18.86
  -1   4   5  162.29   19.14
  -1  -4  -5  185.30   15.60
  -1   4   5  165.79   28.91
   1   4  -5  177.04   14.96
   1  -4   5  136.62   17.86
  -1  -4  -5  157.90   11.09
  -1  -4  -5  184.02   21.43
   1   4  -5  166.74   15.47
   1  -4   5  116.62   15.71
   1   4  -5  180.14   16.22
  -1  -4  -5  175.68   30.33
  -1   4   5  154.60   13.76
  -1   4   5  138.31   13.31
   1   4  -5  143.39   15.77
   1  -4  -5  158.08   18.72
  -1   4  -5  210.57   25.66
   1  -4  -5  209.75   25.83
  -1  -4   5  176.35   26.24
  -1  -4   5  105.06   16.27
  -1  -4   5  167.98   14.68
  -1  -4   5  162.91   34.33
  -1  -4   5  171.63   21.65
   1   4   5  137.52   13.90
  -1   4  -5  199.14   20.36
   1   4   5  161.28   27.90
  -1   4  -5  186.96   21.82
  -1  -4   5  171.88   14.14
  -1   4  -5  178.26   13.73
   1  -4  -5  173.47   17.99
   1  -4  -5  181.58   12.04
   1  -4  -5  219.96   18.98
   1  -4  -5  188.43   11.92
   1  -4  -5  184.59   18.32
  -1  -5  -5  135.85   17.09
  -1   5   5  134.38   15.47
   1   5  -5  171.54   15.92
   1   5  -5  125.95   12.83
   1   5  -5  113.85   13.93
   1   5  -5  135.34   13.18
  -1   5   5  114.35   15.76
   1   5  -5  134.64   12.52
   1  -5   5  118.20   14.71
  -1  -5  -5  142.05   18.26
   1  -5   5  111.60   15.80
  -1   5   5  118.69   25.73
  -1   5   5  113.78   10.65
  -1  -5  -5  139.87    9.75
  -1  -5  -5  138.73   12.10
   1   5  -5  139.18   13.43
  -1   5   5  118.27   11.23
  -1  -5   5  130.11   11.43
  -1   5  -5  136.68   14.55
   1   5   5  106.09   11.86
  -1  -5   5  119.49   29.20
  -1   5  -5  131.49   10.71
  -1   5  -5  125.63   16.22
  -1   5  -5  137.34   11.50
  -1   5  -5  157.49   22.07
  -1  -5   5   73.07   13.60
  -1  -5   5  128.66   18.32
  -1  -5   5  180.01   13.80
   1  -5  -5  123.70   15.42
   1  -5  -5  131.57   14.75
   1  -5  -5  163.62   21.64
   1  -5  -5  129.90    8.34
   1  -5  -5  135.20    8.79
   1  -5  -5  121.53   11.22
   1   5   5  112.23   13.76
   1  -5  -5  143.86   15.42
  -1  -5   5  135.24   11.44
   1   6  -5  112.19   10.50
  -1  -6  -5  133.37    9.41
   1  -6   5  109.76   14.25
   1  -6   5  100.13   14.96
  -1  -6  -5  126.50   16.30
  -1   6   5  120.96   14.48
  -1  -6  -5  115.60    8.17
   1   6  -5  109.43   13.51
  -1  -6  -5  128.55   13.06
  -1  -6  -5  133.83   17.49
   1   6  -5  127.71   12.35
   1   6  -5  122.25   11.97
  -1   6   5  109.13   10.69
  -1   6   5  104.30   25.57
  -1   6   5  106.48   14.65
  -1   6   5  103.88    9.73
   1   6  -5  123.63   13.61
   1   6  -5  118.17   12.58
  -1  -6  -5  126.86   11.04
   1  -6  -5  118.66   13.79
   1  -6  -5  127.66    7.67
   1  -6  -5  133.79    8.04
  -1   6  -5  118.69   15.80
  -1   6  -5  124.84   11.22
  -1  -6   5   62.51   12.67
   1  -6  -5  154.97   19.90
   1  -6  -5  115.27   24.36
  -1  -6   5  115.39   27.07
   1  -6  -5  132.01   14.98
  -1   6  -5  146.89   20.47
  -1   6  -5  126.99   14.10
   1   6   5  100.90   11.19
   1   6   5  102.36   13.10
  -1   6  -5  121.48   10.44
  -1  -6   5  124.03   10.59
  -1  -6   5  121.50   12.63
  -1  -6   5  118.39   10.37
  -1  -6   5  119.54   10.05
   1  -6  -5  119.86   11.17
  -1  -6   5  125.07   17.40
  -1   7   5   97.23   13.35
   1   7  -5  102.63   11.90
   1   7  -5  104.42    9.98
  -1  -7  -5  117.53   12.60
  -1  -7  -5  117.98   10.05
   1  -7   5  101.23   13.44
  -1  -7  -5  122.54    8.71
  -1  -7  -5  116.32    7.80
  -1   7   5  110.60   14.06
   1   7  -5  111.32   11.55
   1   7  -5  105.76   12.27
   1  -7   5   90.47   14.27
  -1  -7  -5  117.23   15.61
  -1  -7  -5  124.37   16.76
   1   7  -5  119.36   11.46
   1   7  -5  105.81   13.22
  -1   7   5   95.59    9.02
  -1   7   5   94.30   15.34
  -1  -7   5  132.33   10.40
   1  -7  -5  110.55   14.59
   1   7   5   94.62   12.31
  -1  -7   5  108.28   11.52
   1  -7  -5  119.98   14.15
   1  -7  -5  145.80   18.35
  -1  -7   5   56.17   11.90
  -1  -7   5  111.31    9.58
   1  -7  -5  108.02   13.61
   1  -7  -5  117.61   10.88
   1  -7  -5  110.22   13.15
  -1   7  -5  111.61   15.13
  -1   7  -5  112.98   10.02
   1   7   5   91.45   10.56
  -1  -7   5  113.39   17.07
  -1  -7   5  107.43   25.70
  -1  -7   5  106.93    9.27
  -1   7  -5  118.85   13.30
  -1   7  -5  110.90   10.85
  -1  -8  -5   48.27    9.88
  -1   8   5   39.78    5.08
   1   8  -5   41.74    7.81
   1  -8   5   37.59    9.29
  -1  -8  -5   50.73   10.80
  -1  -8  -5   47.38    4.42
  -1  -8  -5   47.46    4.00
  -1   8   5   37.66    5.84
  -1   8   5   41.21   14.73
  -1  -8  -5   48.54    8.19
   1   8  -5   41.84    5.76
   1   8  -5   41.88    7.04
   1   8  -5   41.17    8.35
   1   8  -5   44.04    7.31
   1   8  -5   47.66    6.71
  -1  -8  -5   48.51    5.52
   1  -8   5   44.33    8.62
   1  -8  -5   59.52   11.25
  -1  -8   5   46.42    5.43
  -1   8  -5   46.64    6.67
  -1  -8   5   41.93    5.14
  -1   8  -5   45.92    8.00
  -1  -8   5   21.80    7.80
  -1  -8   5   44.97   11.04
  -1   8  -5   47.34    5.92
  -1   8  -5   43.83    9.37
  -1  -8   5   45.93    6.73
   1  -8  -5   49.96    8.97
   1  -8  -5   49.84    6.77
   1  -8  -5   44.33    8.10
  -1  -8   5   46.59   17.02
  -1  -8   5   57.77    5.37
   1   8   5   37.29    6.38
  -1   9   5   52.94    7.31
  -1   9   5   57.17    8.91
   1   9  -5   67.99    7.91
  -1  -9  -5   68.55   11.76
   1   9  -5   61.06   10.05
   1  -9   5   64.85   17.07
   1   9  -5   60.64    8.46
   1   9  -5   58.60    9.56
   1   9  -5   61.68    7.16
  -1  -9  -5   68.20    5.52
   1  -9   5   54.75   10.93
   1   9  -5   64.39    9.13
  -1  -9  -5   68.85    6.63
  -1  -9  -5   74.71   12.55
  -1  -9  -5   70.10   10.08
  -1  -9  -5   73.95    5.12
   1  -9   5   61.74   10.43
  -1   9   5   62.72   11.76
   1  -9  -5   86.72   12.80
   1  -9  -5   74.16    8.27
  -1  -9   5   32.85    9.06
   1   9   5   51.79    7.80
  -1   9  -5   63.17    8.56
   1  -9  -5   67.14   10.05
  -1   9  -5   63.34    9.54
  -1  -9   5   59.60    6.17
  -1  -9   5   71.31    6.77
  -1  -9   5   61.19    7.80
  -1   9  -5   63.91   11.48
  -1  -9   5   67.81   13.32
  -1  -9   5   65.94   19.77
  -1   9  -5   64.93    7.38
   1  -9  -5   64.13    9.67
   1  -9  -5   71.52   10.98
  -1  10   5  103.17   15.64
  -1  10   5   97.98   36.67
   1  10  -5  101.79    9.81
  -1 -10  -5  110.19    8.92
   1  10  -5  109.10   10.56
   1  10  -5  103.80   13.29
   1  10  -5   99.25   11.43
   1  10  -5  107.44   12.47
  -1 -10  -5  121.92   17.01
  -1  10   5   90.20    7.79
   1 -10   5  106.32   19.95
   1 -10   5  101.85   13.15
  -1 -10  -5  110.37   13.88
  -1 -10  -5  126.19    7.71
  -1 -10  -5  109.19   15.35
   1  10  -5   90.62   12.75
   1 -10   5   83.46   13.50
  -1  10   5   87.46   10.18
  -1 -10  -5  106.78    7.96
   1 -10  -5  100.82   12.15
   1 -10  -5  111.20   12.93
  -1 -10   5   56.19   11.06
  -1  10  -5  103.30   11.54
  -1 -10   5  110.03   16.99
  -1 -10   5   92.67    8.25
  -1 -10   5  100.34   10.05
   1  10   5   83.88    9.94
   1 -10  -5  138.12   16.15
  -1 -10   5  116.04    9.46
  -1 -10   5  115.41   24.77
  -1  10  -5  102.26   10.17
  -1  10  -5  106.70   13.10
  -1  10  -5  107.42   15.43
   1 -10  -5  102.43   13.88
   1 -10  -5  112.79   23.20
   1 -10  -5  124.67   11.52
   1  11  -5   11.42    5.39
  -1 -11  -5   15.93    7.04
  -1 -11  -5   13.39    2.81
   1 -11   5   13.90    5.27
   1  11  -5   11.35    3.29
   1  11  -5   12.65    5.09
   1  11  -5   13.44    4.79
   1  11  -5   13.89    4.29
  -1  11   5   13.18   16.90
  -1  11   5   10.33    3.92
  -1  11   5   13.44    6.51
  -1 -11  -5   14.92    5.87
  -1 -11  -5   13.05    2.30
  -1 -11  -5   12.93    1.72
   1 -11   5   10.02    5.60
   1 -11   5   20.59    8.13
  -1 -11  -5   15.97    6.22
  -1  11   5    8.76    3.56
  -1  11   5    9.02    2.41
   1 -11  -5   -0.20    4.63
   1  11   5    8.80    3.64
   1 -11  -5   14.25    5.47
   1 -11  -5   17.24    4.35
  -1  11  -5   12.67    6.17
  -1 -11   5   17.64   11.27
  -1 -11   5   11.36    2.75
  -1 -11   5   13.19    7.21
  -1 -11   5    7.77    4.76
   1 -11  -5   15.55    5.24
  -1  11  -5   11.21    3.50
  -1 -11   5   13.40    3.54
  -1 -11   5   14.38    3.13
  -1  11  -5   13.21    4.79
  -1  11  -5   12.38    4.95
   1 -11  -5   12.51    4.97
   1 -11  -5   20.81    6.21
   1 -11  -5   12.19    5.66
  -1 -12  -5  161.11   19.68
   1 -12   5  127.75   17.73
  -1  12   5  132.66   14.47
   1  12  -5  138.33   17.82
  -1 -12  -5  189.38   22.35
   1  12  -5  146.40   16.03
   1  12  -5  135.22   11.50
   1  12  -5  135.21   19.38
  -1  12   5  142.88   46.01
   1  12  -5  132.95   15.43
   1  12  -5  161.46   13.60
  -1 -12  -5  165.66   19.28
   1 -12   5  156.36   17.34
   1 -12   5  163.73   23.14
  -1 -12  -5  160.16   11.50
  -1  12   5  153.57   21.86
  -1  12   5  131.71   10.46
  -1  12  -5  154.86   16.92
   1 -12  -5  150.28   17.80
  -1  12  -5  169.75   20.70
  -1 -12   5  190.47   14.04
  -1 -12   5  118.73   17.65
  -1 -12   5  153.66   13.29
  -1 -12   5  163.56   22.51
  -1  12  -5  154.45   16.85
  -1  12  -5  148.01   13.98
   1 -12  -5  221.25   21.26
   1 -12  -5  203.25   16.93
   1 -12  -5  148.52   23.69
   1 -12  -5  160.61   17.05
   1 -12  -5  178.16   17.26
  -1 -12   5  136.17   15.34
   1 -12  -5  163.46   18.23
   1  13  -5   55.17    7.25
  -1  13   5   40.07    7.23
  -1  13   5   54.42    8.92
   1 -13   5   73.35   13.32
   1  13  -5   61.47   11.58
   1  13  -5   54.62    6.06
  -1 -13  -5   70.60   12.22
   1 -13   5   55.02   11.06
   1 -13   5   69.44   10.37
  -1 -13  -5   71.87    5.84
   1  13  -5   63.61    6.91
  -1 -13  -5   77.90   13.35
   1  13  -5   57.39    9.64
  -1 -13  -5   68.81   11.79
   1  13  -5   56.39    9.13
  -1  13   5   64.68   32.31
  -1  13   5   52.43    5.10
  -1  13   5   63.61   13.35
   1 -13  -5   62.19   10.56
   1 -13  -5   78.21    9.98
  -1  13  -5   62.14    9.81
  -1 -13   5   60.97    5.84
   1  13   5   49.08    6.83
   1 -13  -5   93.38   11.30
   1 -13  -5   70.44    9.85
   1  13   5   57.21    8.37
  -1 -13   5   58.93    6.20
  -1 -13   5   54.42   10.97
  -1 -13   5   71.73   14.38
  -1 -13   5   61.72    6.79
  -1  13  -5   65.62   18.40
  -1  13  -5   61.49    7.92
  -1  13  -5   65.76   10.19
   1 -13  -5   59.11   14.93
   1 -13  -5   64.53   10.94
  -1 -14  -5   42.11    9.18
   1  14  -5   34.17    7.87
   1  14  -5   33.83    5.93
   1  14  -5   33.65    4.76
  -1  14   5   40.84   11.30
  -1 -14  -5   46.30   10.22
   1  14  -5   34.59    7.13
   1  14  -5   37.30    5.06
  -1 -14  -5   43.11    4.16
   1 -14   5   48.31   10.40
  -1  14   5   31.33    3.74
  -1  14   5   28.90   26.97
   1 -14  -5   34.41    8.38
  -1 -14   5   34.54    8.58
  -1  14  -5   34.98    8.13
   1 -14  -5   52.63    8.13
  -1 -14   5   40.07    4.60
   1  14   5   33.21   10.02
  -1 -14   5   41.37    5.14
   1 -14  -5   45.68    7.88
   1 -14  -5   59.25    8.72
  -1 -14   5   37.58    5.04
  -1  14  -5   37.83    8.29
  -1  14  -5   38.55    6.56
   1 -14  -5   38.23   13.29
   1 -14  -5   41.04    8.72
   1 -15   5   15.03   11.10
  -1  15   5   12.73   19.97
   1  15  -5   13.30    4.00
   1  15  -5   12.54    4.83
   1  15  -5   14.68    3.05
  -1 -15  -5   19.64    7.08
  -1 -15  -5   15.13    2.47
   1  15  -5   14.72    5.64
  -1 -15  -5   15.67    2.79
   1  15  -5   12.43    3.01
  -1 -15  -5   17.23    6.46
  -1  15   5   11.58    2.32
  -1  15   5   12.85    7.59
  -1  15  -5   14.07    5.66
  -1 -15   5   14.32    6.09
  -1 -15   5   16.05    3.05
  -1  15  -5    7.34    4.93
  -1 -15   5   14.63    3.21
   1 -15  -5   15.51    6.00
  -1 -15   5   15.63    3.41
  -1  15  -5   16.51    5.84
  -1  15  -5   12.36    7.51
   1 -15  -5   12.58    5.77
   1 -15  -5   25.47    5.96
   1 -15  -5   14.13    8.59
   1  15   5   10.37    3.63
   1  16  -5    6.95    3.99
   1 -16   5    8.88    3.01
  -1 -16  -5   10.29    5.27
  -1 -16  -5    8.92    5.76
   1  16  -5    6.95    2.39
  -1  16   5    5.43    1.88
   1  16  -5    8.31    4.81
   1  16  -5    8.87    3.41
  -1  16   5    6.96    6.45
  -1  16   5    4.52   17.40
   1  16  -5    7.05    2.39
   1 -16  -5    8.75    5.14
  -1  16  -5    8.92    4.99
  -1  16  -5    7.47    4.10
  -1 -16   5    7.68    5.08
  -1  16  -5    7.12    3.66
   1 -16  -5    6.13    6.89
  -1 -16   5   10.12    2.53
   1  16   5    5.13    3.14
  -1 -16   5    8.38    2.63
  -1 -16   5    4.05    2.66
   1 -16  -5   13.64    4.56
  -1 -17  -5   21.99    7.43
   1  17  -5   13.72    5.13
   1  17  -5   14.67    6.29
  -1 -17  -5   20.36    6.54
   1  17  -5   12.59    2.89
   1 -17   5   12.77    3.71
  -1  17   5   12.48    2.45
   1  17  -5   11.10    3.04
  -1  17   5   11.60   21.90
  -1  17   5   13.90    8.46
  -1  17  -5   13.02    5.42
  -1 -17   5   16.13    3.24
   1  17   5    9.63    4.10
  -1 -17   5   33.06    4.03
  -1 -17   5   15.64    6.39
  -1 -17   5   14.65    3.14
  -1  17  -5   13.11    4.76
  -1  17  -5   12.98    6.37
   1 -17  -5   10.75    8.31
   1 -17  -5   16.76    6.54
   1 -17  -5   24.73    5.62
  -1  18   5   13.46   22.03
  -1 -18  -5   21.14    7.64
   1  18  -5   12.06    3.05
   1  18  -5   14.51    5.39
   1  18  -5   17.73    6.39
  -1 -18  -5   16.76    6.73
   1 -18   5   12.67    3.68
  -1  18   5   14.76    8.67
   1  18   5   10.37    4.31
  -1  18  -5   15.75    5.38
  -1  18  -5   17.09    6.55
  -1 -18   5   17.07    3.25
   1 -18  -5   16.25    6.58
  -1  18  -5   14.35    4.93
  -1 -18   5   17.76    6.68
   1 -18  -5   11.77    7.66
   1 -18  -5   16.34    5.97
  -1  19   5    9.19    7.09
  -1 -19  -5    9.72    5.45
   1  19  -5    7.31    5.26
   1  19  -5    6.30    4.37
  -1 -19  -5   10.25    5.97
  -1  19   5    2.70   18.56
   1 -19  -5   18.26    5.46
   1  19   5    5.13    3.67
  -1  19  -5    7.64    4.22
  -1 -19   5   10.96    5.47
  -1 -19   5    5.85    2.60
  -1  19  -5    7.73    5.47
  -1  19  -5    5.62    4.88
   1 -19  -5    7.68    5.54
   1 -19  -5    5.43    6.60
  -1  19  -5    8.58    4.13
  -1 -20  -5   52.00   10.58
  -1  20   5   36.28   30.70
  -1  20   5   35.61   12.83
   1  20  -5   38.07    9.34
  -1 -20  -5   47.17    9.93
   1  20  -5   38.66    8.06
   1 -20  -5    8.13    6.38
   1 -20  -5   41.47   10.00
  -1  20  -5   42.16    9.68
  -1 -20   5   44.85    5.45
  -1  20  -5   38.13    7.73
  -1 -20   5   55.51    9.93
   1  20   5   29.49    6.76
  -1  20  -5   40.33    7.64
  -1  20  -5   36.04    9.02
   1 -20  -5   45.91    9.59
   1  20   5    0.67   25.87
  -1 -21  -5   97.50   14.69
   1  21  -5   73.73   12.84
  -1 -21  -5   83.50   13.92
  -1  21   5   74.57   18.22
  -1  21   5   75.16   40.58
  -1  21  -5   72.14   10.54
  -1  21  -5   69.47   11.13
  -1 -21   5   79.55   15.94
   1  21   5   45.05   35.08
  -1  21  -5   69.99   13.40
  -1 -21   5   76.13    7.81
   1  21   5   50.91    9.90
  -1  21  -5   72.91   12.89
   1 -21  -5   70.26   10.08
   1 -21  -5   75.27   13.88
   1 -21  -5   76.90   12.56
  -1 -22  -5   19.92    7.04
  -1 -22  -5   19.68    7.06
   1  22  -5   17.26    6.76
  -1  22   5   18.27    9.51
   1 -22  -5   10.69    4.52
   1 -22  -5   14.98    6.29
  -1  22  -5   13.22    5.56
   1  22   5    9.94   20.36
  -1  22  -5   17.24    7.17
   1  22   5   12.42    5.12
  -1  22  -5   15.21    5.16
   1 -22  -5   15.78    7.34
  -1 -22   5   15.27    4.77
   1  23  -5    0.79    3.12
   1  23  -5    5.91    4.67
  -1 -23  -5    7.73    4.87
   1  23  -5    5.12    4.04
  -1 -23  -5    4.88    4.89
  -1  23   5    5.67    6.71
   1 -23  -5    6.01    4.33
  -1  23  -5    4.01    4.01
   1  23   5    0.57   14.36
   1  23   5    4.67    3.53
  -1  23  -5    3.78    3.46
  -1 -23   5    5.70    3.21
  -1  23  -5    6.34    5.12
   1 -23  -5    4.68    3.20
   1 -23  -5    5.35    5.17
  -1  24   5  111.57   22.55
  -1 -24  -5  137.00   17.71
   1  24  -5   87.12   11.92
   1  24  -5  104.10   15.07
  -1 -24  -5  121.82   16.77
   1 -24   5  106.39   14.79
   1  24  -5  102.01   14.50
   1  24   5   76.69   12.55
  -1  24  -5  111.81   19.45
  -1  24  -5  107.07   16.65
  -1  24  -5   99.02   14.61
  -1 -24   5  122.08   13.36
   1  24   5   67.74   39.58
   1 -24  -5  112.15   15.73
   1 -24  -5   98.08   11.84
   1 -24  -5  114.74   17.93
   1 -25   5   59.98   10.67
  -1 -25  -5   78.82   12.15
   1  25  -5   78.53   19.95
   1  25  -5   51.72    8.47
   1  25  -5   60.94   10.54
  -1 -25  -5   75.08   12.26
  -1  25   5   63.39   16.46
   1 -25  -5   57.86    8.21
   1  25   5   28.36   28.75
  -1 -25   5   65.41    8.85
   1 -25  -5   63.73   11.05
  -1  25  -5   64.52    8.62
  -1  25  -5   62.52   12.06
  -1  25  -5   57.02   10.76
   1 -25  -5   67.81   12.56
   1  25   5   43.36    9.46
   1 -26   5   89.93   12.77
  -1 -26  -5   83.78   12.76
   1  26  -5   83.86   12.83
   1  26  -5   59.82    9.64
   1  26  -5   73.39   11.83
  -1 -26  -5   89.96   14.04
  -1  26   5   77.44   18.01
   1 -26  -5   78.16   14.27
  -1  26  -5   86.20   13.57
   1  26   5   48.51   31.37
   1  26   5   82.00   17.90
  -1  26  -5   80.05   10.13
  -1 -26   5   84.04   10.06
  -1  26  -5   76.56   12.96
   1 -26  -5   84.59   13.77
  -1 -27  -5   25.30    6.50
   1  27  -5   31.06    7.54
   1  27  -5   22.20    5.74
   1  27  -5   21.74    6.52
  -1  27   5   22.80   11.18
  -1 -27  -5   30.61    8.01
  -1  27   5   35.99   15.78
  -1  27  -5   25.53    5.09
   1  27   5    7.77   19.88
  -1 -27   5   25.47    4.85
   1 -27  -5   26.18    8.66
  -1  27  -5   26.47    7.73
  -1  27  -5   14.05   15.44
   1 -27  -5   26.81    8.18
  -1  28   5    1.32    9.71
  -1 -28  -5    8.04    4.10
  -1  28   5   -0.30    6.75
   1  28  -5    0.09    4.12
  -1 -28  -5   -0.03    5.16
   1  28  -5    0.07    3.70
   1  28  -5   10.27    4.68
  -1  28  -5    6.48    2.87
  -1  28  -5   10.44    5.33
  -1 -28   5   10.19    3.17
   1  28   5    4.24   14.32
  -1  28  -5    8.77    8.00
   1 -28  -5   10.69    5.68
   1 -28  -5   11.44    5.34
  -1 -29  -5    0.67    4.20
   1 -29   5   -0.01    3.66
   1  29  -5   -0.36    3.01
   1  29  -5    5.08    3.56
  -1 -29  -5    3.72    2.91
   1  29  -5    0.05    3.17
  -1  29   5    0.79    7.75
  -1  29   5   -0.17    5.63
  -1  29  -5    3.78    4.39
   1  29   5    6.21   11.35
  -1 -29   5    4.13    2.28
  -1  29  -5    5.13    3.88
   1 -29  -5    0.05    4.66
   1 -29  -5    2.75    4.33
  -1  30   5    1.04   13.93
   1  30  -5   13.26    5.31
   1  30  -5    0.25    5.04
   1  30  -5   20.80    5.75
  -1 -30  -5   -0.12    7.16
  -1 -30  -5    9.10    4.63
  -1  30   5    0.61    9.79
   1 -30   5   18.51    6.13
   1  30   5   15.96    6.21
   1  30   5    4.45   18.48
  -1 -30   5   14.09    3.22
  -1  30  -5   19.28    7.66
  -1  30  -5   23.49    6.70
   1 -30  -5   19.72    7.96
   1 -30  -5   16.31    7.42
  -1  31   5   -0.21    6.09
   1  31  -5    0.04    2.84
   1  31  -5    3.83    3.31
   1  31  -5   -0.34    3.79
  -1 -31  -5    0.37    4.22
  -1  31   5    1.46    7.93
   1 -31   5    0.05    3.56
   1  31   5    3.39    3.89
   1  31   5    1.17   11.36
  -1  31  -5    4.25    4.30
  -1  31  -5    4.41    4.43
   1 -31  -5   -0.07    5.01
   1 -31  -5    5.54    4.17
  -1  32   5   -0.21    4.96
  -1 -32  -5   -0.12    4.10
   1  32  -5   -0.49    2.33
  -1  32   5   -0.36    6.27
   1  32  -5   -0.17    3.59
   1  32  -5    0.21    2.75
  -1  32  -5    2.10    4.59
   1 -32  -5    0.33    8.25
   1  32   5    0.80    3.22
   1  32   5    2.79    9.17
   1 -32  -5    2.09    3.62
  -1  32  -5    3.42    3.71
   1  33  -5    1.58    2.08
   1  33  -5   -0.32    1.95
   1  33  -5    0.03    2.62
  -1 -33  -5   -0.62    2.99
  -1  33   5   -0.14    4.25
   1  33   5    1.10    6.55
   1  33   5   -1.59    2.37
  -1  33  -5   -0.76    2.64
  -1  33  -5   -1.74    3.50
   1 -33  -5    2.29    2.63
   1 -33  -5    0.03    4.13
   1 -34   5    5.45    4.63
   1  34  -5    1.80    3.96
   1  34  -5   -0.04    5.09
   1  34  -5    2.39    3.71
  -1 -34  -5   16.19    5.41
  -1  34   5   -1.85    7.00
   1 -34  -5   -0.16    8.16
   1 -34  -5   -2.34    4.72
  -1  34  -5    1.85    6.95
   1  34   5    0.07    5.02
   1  34   5   -0.33   18.68
  -1  34  -5   12.13    4.97
  -1  35   5   -3.39    9.55
  -1 -35  -5    8.80    4.55
   1  35  -5    0.91    4.41
   1  35  -5    0.55    3.30
   1 -35   5   10.02    4.18
   1  35  -5    2.14    3.16
   1  35   5   -4.31    8.30
  -1  35  -5    2.03    4.12
  -1  35  -5   -2.26    5.97
   1 -35  -5   -3.37    3.81
   1 -35  -5   -6.70    7.17
  -1 -36  -5    2.01    3.95
   1  36  -5    0.45    3.78
   1 -36   5   -1.62    3.56
   1 -36  -5    1.39    5.58
  -1  36  -5   -0.47    3.28
   1  36   5   -4.63    6.95
   1 -36  -5   -8.08    6.37
   1  37  -5    0.68    5.39
  -1 -37  -5    6.91    5.55
   1 -37   5   10.50    5.89
  -1  37   5    5.00   17.22
   1 -37  -5    6.91   10.34
  -1   0  -6   27.12   11.15
  -1   0  -6   28.54    8.34
   1   0   6   16.71    7.58
   1   0  -6   23.23    6.64
  -1   0   6   17.59    4.01
  -1   0   6   36.08    5.77
  -1   0   6   19.40    7.17
  -1   0   6   24.15    8.59
   1   0  -6   22.35    3.25
   1   0  -6   20.27    5.54
   1   0  -6   20.06    3.37
   1   0  -6   21.63    6.62
  -1   0   6   23.91   16.51
   1   0   6   20.03    6.75
  -1   0  -6   20.68    3.41
  -1  -1  -6   48.89   10.87
  -1  -1  -6   58.40   14.98
   1  -1   6   37.55    8.97
   1  -1   6   33.62    9.63
  -1   1   6   44.66    5.92
  -1   1   6   33.35    6.39
  -1   1   6   43.50    9.77
  -1   1   6   39.84    5.63
   1   1  -6   42.17    5.09
   1   1  -6   46.70    7.41
  -1   1   6   51.51   12.46
   1   1  -6   45.87    9.01
   1   1  -6   49.04    5.05
  -1  -1  -6   50.09    5.16
  -1  -1  -6   48.43    7.60
   1   1   6   38.42    8.94
  -1   1  -6   49.74   10.77
  -1   1  -6   51.93   14.76
   1   1   6   35.71   11.14
   1  -1  -6   49.50    8.87
   1  -1  -6   43.30    4.63
   1  -1  -6   46.71    7.70
   1  -1  -6   45.47    8.94
  -1  -1   6   52.05   10.67
  -1  -1   6   41.74    5.47
  -1  -1   6   45.26    9.43
   1  -1  -6   46.76    6.54
  -1  -1   6   45.92   21.70
   1  -1  -6   51.26    4.72
  -1   1  -6   47.26    8.01
  -1   1  -6   48.14    5.22
  -1   1  -6   42.65    4.13
  -1  -2  -6    1.55    3.79
   1  -2   6   -0.36    3.18
  -1  -2  -6    1.84    1.43
   1   2  -6    0.88    1.64
  -1   2   6    2.58    3.38
  -1   2   6    1.75    4.43
  -1   2   6   -0.43    1.83
   1   2  -6    0.89    2.62
   1   2  -6    2.51    2.45
  -1   2   6    0.88    2.07
  -1   2   6    0.72    1.83
   1   2  -6    1.46    1.63
   1   2  -6    1.54    2.70
  -1  -2  -6    0.76    5.20
  -1  -2  -6    2.66    2.39
   1  -2  -6    0.76    2.60
  -1   2  -6    1.17    2.67
  -1   2  -6   -0.07    5.14
   1   2   6    0.87    4.06
  -1  -2   6    2.30    1.75
  -1  -2   6    0.59    3.13
  -1  -2   6    0.46    7.76
  -1  -2   6    0.47    3.16
   1  -2  -6    1.14    3.04
   1  -2  -6    2.05    2.93
   1  -2  -6    0.50    1.18
  -1  -2   6   -0.22    3.21
   1  -2  -6    1.28    1.17
   1   2   6    0.92    3.06
  -1   2  -6    0.96    3.72
  -1   2  -6    0.93    1.28
  -1   2  -6    1.38    1.54
   1  -3   6  156.18   19.56
   1  -3   6  172.99   20.20
  -1   3   6  195.85   29.33
   1   3  -6  201.89   18.38
   1   3  -6  201.01   19.43
  -1   3   6  190.89   17.48
  -1   3   6  164.75   14.57
  -1   3   6  175.30   21.57
   1   3  -6  207.61   21.19
   1   3  -6  184.80   15.64
   1   3  -6  168.02   18.18
  -1   3   6  145.10   14.31
  -1  -3  -6  202.52   17.74
  -1  -3  -6  196.61   23.40
  -1  -3  -6  197.61   13.89
  -1  -3  -6  249.44   31.83
   1   3   6  156.76   18.35
   1   3   6  137.01   14.65
  -1   3  -6  219.53   21.15
  -1   3  -6  198.58   14.57
  -1   3  -6  233.04   30.98
  -1   3  -6  206.66   24.08
   1  -3  -6  183.88   20.16
  -1  -3   6  135.26   19.43
   1  -3  -6  187.50   12.65
   1  -3  -6  210.55   13.18
   1  -3  -6  204.52   28.82
   1  -3  -6  173.58   13.97
   1  -3  -6  198.48   20.47
  -1  -3   6  176.03   15.80
  -1  -3   6  183.46   20.61
  -1  -3   6  185.25   40.38
  -1  -3   6  174.11   14.38
   1   3   6  168.96   27.64
   1  -4   6   76.67   12.54
   1  -4   6   69.62   12.48
  -1  -4  -6   89.20    9.76
   1   4  -6   84.66   12.27
   1   4  -6   79.45    8.89
  -1   4   6   85.38   10.19
  -1   4   6   72.24    8.30
  -1  -4  -6   84.90   14.42
  -1   4   6   85.54   20.28
  -1   4   6   67.58    8.30
   1   4  -6   79.61   11.98
   1   4  -6   87.75   11.08
   1   4  -6   88.18   10.48
   1   4  -6  113.83   10.15
  -1   4   6   76.25   13.15
  -1  -4  -6  109.98   20.40
  -1  -4  -6   87.45    6.85
  -1   4  -6   81.95    7.42
   1   4   6   63.24    8.92
  -1   4  -6   99.60   19.32
   1  -4  -6   89.39    8.37
   1   4   6   77.19   18.94
   1  -4  -6   87.28   12.46
  -1  -4   6   81.63   27.15
  -1  -4   6   80.09   12.13
  -1  -4   6   76.63    8.35
   1  -4  -6   91.83   12.14
   1  -4  -6   81.05   12.13
  -1  -4   6   54.30   12.05
  -1  -4   6   83.65    8.54
   1   4   6   70.02   11.47
  -1   4  -6   81.25    7.56
  -1   4  -6   92.87   24.53
  -1   4  -6   88.33   12.04
   1  -5   6    8.25    5.55
  -1  -5  -6   10.12    2.20
  -1   5   6    9.04    9.72
  -1   5   6    7.72    3.33
   1   5  -6   11.90    4.42
   1   5  -6   10.43    6.62
  -1   5   6    8.79    3.20
   1   5  -6   11.04    3.14
   1   5  -6   10.26    3.53
   1   5  -6   16.98    3.46
   1   5  -6    8.34    4.89
  -1  -5  -6    9.44    6.23
  -1   5   6    6.71    5.67
  -1  -5  -6   12.84    8.94
   1  -5   6    7.70    5.51
  -1  -5  -6   10.50    3.67
  -1   5   6    9.43    4.04
   1  -5  -6    9.56    8.46
  -1   5  -6   10.30    2.89
  -1   5  -6    8.09    2.78
  -1   5  -6    8.97    4.84
   1  -5  -6    8.16    5.10
   1  -5  -6   11.31    5.06
   1  -5  -6    8.87    3.01
   1  -5  -6   12.01    5.20
  -1  -5   6    8.79    5.02
  -1  -5   6    7.33    2.83
  -1  -5   6    9.77    3.13
  -1  -5   6    7.38    6.10
  -1  -5   6    6.17    5.34
  -1  -5   6    9.30   12.43
   1   5   6    4.41    3.67
   1   5   6    9.35    8.96
   1   5   6    7.10    4.96
  -1   5  -6    7.66    5.72
  -1   5  -6    8.34    8.22
  -1  -6  -6  126.07    8.96
   1  -6   6  115.79   16.18
  -1   6   6  107.23   11.08
  -1  -6  -6  134.67   12.25
   1   6  -6  132.13   13.61
   1   6  -6  120.02   11.77
  -1   6   6  125.12   13.61
  -1   6   6  102.94   10.34
  -1   6   6  109.66   16.23
  -1   6   6  117.03   27.01
   1   6  -6  114.26   14.64
   1   6  -6  114.82   12.15
   1   6  -6   92.71    9.97
   1   6  -6  118.25   11.13
  -1  -6  -6  165.81   25.03
  -1  -6  -6  123.70    8.77
  -1  -6  -6  125.69   17.34
   1  -6   6  102.31   15.64
   1   6   6   96.48   11.69
  -1   6  -6  123.20   11.06
   1  -6  -6  158.11   23.49
   1  -6  -6  130.37   10.76
  -1  -6   6  126.58   15.06
   1  -6  -6  117.24   14.89
   1  -6  -6  125.57   15.18
   1  -6  -6  135.01   15.72
  -1  -6   6  117.96   31.40
  -1  -6   6  130.13   10.29
  -1  -6   6  119.95   10.60
  -1  -6   6   66.74   14.21
  -1  -6   6  121.50   18.63
   1   6   6  106.23   14.31
   1   6   6  118.40   26.43
  -1   6  -6  132.33   15.53
  -1   6  -6  121.83   10.65
  -1   6  -6  125.23   17.10
  -1   7   6   71.60   13.50
  -1  -7  -6   97.44    9.67
  -1  -7  -6   94.18   23.69
   1   7  -6   88.49   10.44
  -1   7   6   79.11   24.65
   1   7  -6   83.59   12.10
   1   7  -6   77.69    8.97
   1   7  -6   83.24   10.42
  -1   7   6   90.58   11.44
   1   7  -6   97.72   11.31
  -1   7   6   73.93    8.26
  -1  -7  -6   95.69   26.90
   1   7  -6   91.10    9.79
  -1   7  -6   89.29    9.38
   1   7   6   84.46   24.10
  -1   7  -6   85.84   13.94
   1  -7  -6   95.54   13.19
  -1  -7   6   90.06   12.06
   1  -7  -6  121.84   19.61
   1  -7  -6   86.28   12.50
  -1  -7   6   83.47   26.06
  -1  -7   6   95.31    8.10
   1  -7  -6   91.50   12.88
   1  -7  -6   89.85   12.23
  -1  -7   6   86.59    8.50
   1  -7  -6   97.65    9.06
  -1   7  -6   90.38   12.36
  -1   7  -6   89.99    8.93
  -1  -8  -6    5.63    4.93
  -1   8   6    3.42    8.87
  -1   8   6    3.33    2.39
  -1   8   6    5.35    3.63
   1   8  -6   -0.33    2.64
   1   8  -6    5.55    3.43
   1   8  -6    4.81    3.46
   1   8  -6    5.25    3.37
   1   8  -6    4.64    2.80
   1   8  -6    3.92    4.00
  -1   8   6    3.91    2.92
  -1  -8  -6    6.42    2.71
  -1  -8  -6    4.26    5.49
   1  -8   6    4.77    8.98
  -1   8  -6    6.35    2.59
   1   8   6    3.09    9.22
   1  -8  -6    5.84    2.60
  -1   8  -6    6.38    2.96
   1  -8  -6    4.85    4.29
   1  -8  -6    4.83    4.18
   1  -8  -6    5.99    4.04
   1  -8  -6    6.52    4.50
  -1  -8   6    5.24    2.07
  -1  -8   6    3.84    6.43
  -1  -8   6    4.45    2.47
  -1  -8   6    7.56    9.51
   1  -8  -6    5.93    6.43
  -1   8  -6    3.68    4.60
  -1   8  -6    6.16    3.87
  -1  -9  -6   58.48   12.04
  -1   9   6   50.13   21.27
   1  -9   6   63.73   19.64
  -1  -9  -6   62.36   13.18
   1   9  -6   57.85    8.75
   1   9  -6   57.71    7.58
   1   9  -6   58.30   10.17
   1   9  -6   52.17    7.13
   1   9  -6   65.28    8.84
  -1   9   6   57.43    9.58
  -1   9   6   49.54    5.88
  -1  -9  -6   65.47    7.17
  -1   9  -6   57.64    8.05
  -1   9  -6   58.96   10.17
  -1   9  -6   60.23    7.38
   1  -9  -6   73.32    7.55
   1  -9  -6   56.10    9.92
   1  -9  -6   63.39   11.09
  -1  -9   6   67.30    6.13
  -1  -9   6   64.34   21.74
  -1  -9   6   58.11    6.54
   1  -9  -6   81.95   15.01
   1  -9  -6   59.38    9.89
   1   9   6   56.82   22.26
  -1   9  -6   60.51   11.51
  -1 -10  -6   19.14    7.62
  -1 -10  -6   21.91    3.95
  -1  10   6   15.82   14.69
   1  10  -6   17.81    4.96
   1  10  -6   17.53    5.49
   1  10  -6   18.53    6.12
   1  10  -6   17.56    4.28
   1  10  -6   16.39    4.22
  -1  10   6   19.18    5.97
  -1 -10  -6   21.47    8.50
  -1  10   6   15.88    3.25
   1 -10   6   25.76   11.29
  -1  10  -6   17.59    4.22
   1 -10  -6   18.61    6.05
   1 -10  -6   23.58    4.46
  -1  10  -6   17.32    6.00
   1 -10  -6   20.86    6.77
   1 -10  -6   17.77    6.14
   1  10   6   18.23   15.18
  -1 -10   6   22.01   14.31
  -1 -10   6   21.10    3.33
  -1 -10   6   19.20    3.79
   1 -10  -6   26.26    9.08
  -1  10  -6   18.53    5.06
  -1  10  -6   18.11    7.20
  -1 -11  -6    7.64    5.37
  -1 -11  -6    6.25    5.85
   1  11  -6    4.35    3.01
   1  11  -6    4.05    2.87
   1  11  -6    5.54    7.76
   1  11  -6    5.75    3.99
  -1  11   6    6.04    4.22
  -1  11   6    4.91   10.94
  -1 -11  -6    7.08    2.54
   1 -11   6   11.05    7.81
  -1  11  -6    5.83    4.18
   1 -11  -6    9.59    6.04
   1 -11  -6    8.63    3.10
  -1  11  -6    5.62    3.74
  -1 -11   6    6.72   10.18
  -1 -11   6    6.17    2.16
  -1 -11   6    4.37    2.60
   1 -11  -6    6.38    4.88
   1 -11  -6    6.47    4.21
   1  11   6    3.62   11.50
  -1  11  -6    6.18    2.79
  -1  11  -6    4.83    5.14
  -1  12   6   56.19   10.50
  -1 -12  -6   68.94   13.51
   1  12  -6   56.92    9.69
   1  12  -6   55.26    9.77
   1  12  -6   58.96   10.80
   1  12  -6   66.32    8.25
   1  12  -6   53.73    7.58
  -1  12   6   46.89   24.49
  -1 -12  -6   68.02    6.54
  -1 -12  -6   66.85   12.60
   1 -12   6   65.49   16.42
  -1  12  -6   60.73   10.26
  -1  12  -6   58.53    7.87
   1 -12  -6   63.31    9.97
   1 -12  -6   64.16   11.80
  -1 -12   6   63.52    6.67
  -1 -12   6   61.53    5.35
  -1 -12   6   44.91   11.25
   1 -12  -6   90.05   13.60
   1  12   6   61.57   25.49
  -1  12  -6   59.25    9.42
  -1  12  -6   65.68   12.48
  -1 -13  -6   13.34    2.78
  -1 -13  -6   10.80    6.68
  -1  13   6    7.89   13.34
   1  13  -6   10.12    3.46
   1  13  -6    9.35    3.34
   1  13  -6    9.56    4.88
   1  13  -6    9.06    4.62
   1  13  -6    6.18    2.93
  -1  13   6   11.48    9.02
   1 -13   6   12.14    7.71
  -1 -13  -6   10.81    6.20
  -1  13  -6    9.76   10.13
   1 -13  -6    9.38    4.72
  -1  13  -6    7.20    3.50
   1  13   6    6.05   13.89
   1 -13  -6    8.09    5.35
   1 -13  -6   10.06    5.97
  -1 -13   6    8.31    5.70
  -1 -13   6    8.87    2.17
   1 -13  -6   15.94    6.23
  -1  13  -6    8.52    4.68
  -1  13  -6    8.29    4.81
  -1 -14  -6    3.13    1.91
  -1 -14  -6    4.99    4.58
  -1  14   6    5.38   18.81
   1  14  -6    3.26    3.37
   1  14  -6    3.88    2.26
   1  14  -6    5.51    3.71
   1  14  -6    1.78    2.04
  -1  14   6    2.85    4.34
  -1 -14  -6    3.95    4.81
   1 -14   6    5.31    5.12
  -1  14  -6    2.67    2.58
  -1  14  -6    1.66    3.38
  -1  14  -6    1.91    3.80
   1  14   6    1.37   10.69
   1 -14  -6    2.66    4.30
   1 -14  -6    4.64    4.51
  -1 -14   6    2.10    1.58
  -1 -14   6    3.85    4.14
   1 -14  -6    2.80    3.85
   1 -14  -6   -0.03    3.33
  -1  14  -6    3.88    3.58
  -1 -15  -6  146.32   11.29
   1 -15   6  169.74   31.91
  -1  15   6   96.68   66.43
   1  15  -6  118.58   15.89
   1  15  -6  118.31   16.27
   1  15  -6  125.44   11.67
   1  15  -6  109.20   10.65
  -1  15   6  119.86   19.28
  -1 -15  -6  148.96   20.30
  -1 -15  -6  141.17   19.38
  -1  15  -6  128.05   20.52
  -1  15  -6  122.46   16.40
   1 -15  -6  129.13   14.90
   1 -15  -6  222.10   22.36
   1  15   6  108.91   40.59
   1 -15  -6  128.33   16.73
  -1 -15   6  131.54   10.17
  -1 -15   6  115.35   17.73
   1 -15  -6  138.70   19.36
  -1  15  -6  125.92   17.22
   1 -16   6   81.84   10.51
   1  16  -6   74.79    8.23
   1  16  -6   83.36   13.04
   1  16  -6   92.68    9.47
   1  16  -6   86.11   14.02
  -1  16   6   86.91   16.82
  -1 -16  -6  101.50   15.77
  -1  16   6   73.35   30.41
  -1 -16  -6  111.26   16.88
  -1  16  -6   91.17   14.09
  -1  16  -6   95.73   13.48
   1  16   6   71.14   35.42
  -1  16  -6   92.76   11.86
   1 -16  -6   92.95   12.09
   1 -16  -6  102.69   16.69
  -1 -16   6   90.56   14.77
   1 -16  -6   94.01   14.27
   1 -16  -6  155.02   17.14
  -1  16  -6   91.00   13.68
  -1 -17  -6   48.26   11.44
  -1  17   6   31.11   11.13
  -1  17   6   29.53   22.53
   1  17  -6   34.69    8.69
   1  17  -6   36.92    5.33
   1  17  -6   36.95    9.63
  -1 -17  -6   43.74   10.73
   1 -17   6   36.41    6.56
   1 -17  -6   60.09   10.27
  -1  17  -6   37.49    9.13
   1 -17  -6   38.53    7.66
   1 -17  -6   41.82   11.34
   1 -17  -6   36.73    9.13
  -1 -17   6   42.67   10.14
  -1  17  -6   41.96    9.09
   1  17   6   30.15   26.06
  -1  17  -6   37.50    7.60
  -1  17  -6   35.37    9.44
  -1 -18  -6   28.32    9.08
  -1  18   6   22.90    9.79
   1  18  -6   22.91    7.10
   1  18  -6   24.81    7.97
   1  18  -6   20.97    3.85
  -1 -18  -6   29.23    8.77
  -1  18   6   25.32   18.97
   1 -18   6   19.85    5.14
   1  18   6   17.30   22.53
  -1  18  -6   20.89    7.42
  -1  18  -6   22.72    7.89
   1 -18  -6   29.60    9.38
  -1 -18   6   27.10    8.64
   1 -18  -6   23.74    7.10
   1 -18  -6   22.23    6.10
  -1  18  -6   22.91    6.25
  -1  18  -6   22.16    6.89
  -1 -19  -6   70.10   13.77
   1  19  -6   57.59   11.17
   1  19  -6   54.81   12.42
  -1  19   6   47.38   27.35
  -1 -19  -6   65.98   13.09
  -1  19  -6   54.72   11.60
  -1  19  -6   55.34   10.21
   1  19   6   38.38   33.07
   1 -19  -6   67.91   14.25
   1 -19  -6   59.02   10.88
  -1 -19   6   70.93   13.35
   1 -19  -6   60.00   10.19
  -1  19  -6   57.07   10.31
  -1  19  -6   58.77   12.19
  -1  20   6  125.83   42.05
  -1  20   6  139.27   24.85
   1  20  -6  151.32   19.52
   1  20  -6  146.27   21.27
  -1 -20  -6  173.21   22.91
  -1 -20  -6  188.47   23.66
   1  20   6   94.64   49.43
  -1  20  -6  145.72   21.09
  -1  20  -6  146.48   20.01
   1 -20  -6  179.74   25.22
   1 -20  -6  157.41   19.92
   1 -20  -6  159.31   18.02
  -1 -20   6  207.21   24.56
  -1  20  -6  153.66   18.80
  -1  20  -6  158.11   18.68
  -1 -21  -6   56.40   11.47
  -1  21   6   38.82   23.69
   1  21  -6   45.84   10.85
   1  21  -6   50.34   16.46
  -1  21   6   38.66   13.11
  -1 -21  -6   52.98   11.33
   1  21   6   25.37   29.48
   1 -21  -6   51.38   10.52
   1 -21  -6   57.90   13.00
  -1 -21   6   62.39   11.30
   1 -21  -6   47.34    8.21
  -1  21  -6   47.79   10.92
  -1  21  -6   50.37   11.58
  -1  21  -6   47.49    8.91
  -1  21  -6   42.66    8.66
  -1 -22  -6   16.64    6.62
   1  22  -6   14.85    6.18
   1  22  -6   15.61    6.10
  -1  22   6   21.45    8.06
  -1 -22  -6   17.48    6.45
  -1  22  -6   18.45    5.14
  -1  22  -6   11.64    6.22
  -1  22  -6   16.89    6.67
   1 -22  -6   18.57    7.97
   1 -22  -6   14.32    6.13
  -1 -22   6   13.72    4.87
   1 -22  -6   13.90    4.46
   1  22   6    8.88   17.84
  -1  22  -6   13.18    5.09
  -1 -23  -6   12.63    5.84
   1  23  -6   11.55    5.47
   1  23  -6   11.05    9.96
  -1  23   6   18.17    7.23
  -1 -23  -6   13.54    6.56
  -1  23  -6   11.86    6.02
   1 -23  -6   13.72    7.42
   1  23   6    7.87   16.47
  -1  23  -6   12.58    4.41
   1 -23  -6    8.55    4.03
   1 -23  -6   12.38    5.59
  -1 -23   6   11.96    4.29
  -1  23  -6   11.27    4.81
  -1 -24  -6   20.80    6.68
  -1 -24  -6   26.07    7.81
   1  24  -6   16.07    6.54
   1  24  -6   23.69    7.20
  -1  24   6   24.45    8.05
   1 -24   6   -3.84    6.12
  -1  24  -6   18.84    5.84
   1 -24  -6   20.51    6.87
   1  24   6    5.96   18.61
   1 -24  -6   24.26    8.26
   1 -24  -6   16.82    4.81
  -1 -24   6   22.39    5.25
  -1  24  -6   18.90    7.05
  -1  24  -6   20.60    4.89
   1 -25   6    0.09    5.29
  -1 -25  -6   -0.11    6.95
  -1 -25  -6   15.36    5.38
   1  25  -6   -0.29    5.47
   1  25  -6   19.52    6.52
   1 -25  -6   16.39    6.10
   1 -25  -6   16.00    7.23
   1 -25  -6   10.23    3.80
  -1 -25   6   15.03    4.17
   1  25   6    4.42   16.69
  -1  25  -6   16.51    6.10
  -1  25  -6   12.86    4.04
  -1  25  -6   12.27    5.16
  -1 -26  -6   82.16   12.73
   1  26  -6   83.90   14.01
   1  26  -6   66.26   11.75
  -1 -26  -6   83.26   15.26
   1 -26   6   75.23   11.81
  -1  26  -6   67.41   12.51
  -1  26  -6   82.01   10.94
   1 -26  -6   78.06   14.48
  -1 -26   6   72.81   10.09
   1 -26  -6   81.83   16.22
   1  26   6   46.55   34.56
  -1  26  -6   69.02   13.14
   1  27  -6   63.39   12.02
   1  27  -6   51.60   10.38
  -1 -27  -6   58.31   15.86
  -1 -27  -6   64.45   13.55
   1 -27   6   54.04   10.50
   1  27   6   27.47   31.67
   1 -27  -6   52.71   12.22
  -1 -27   6   49.68    7.87
   1 -27  -6   64.53   14.61
  -1  27  -6   52.76   18.27
  -1  27  -6   51.13    8.18
  -1  27  -6   47.63   17.36
  -1  28   6   16.03   18.57
   1  28  -6   15.90    6.91
   1  28  -6   24.22    7.79
  -1 -28  -6   26.52    9.34
  -1 -28  -6   19.52    8.19
  -1  28  -6   28.68    8.93
  -1  28  -6   16.25    4.85
  -1 -28   6   20.32    5.24
   1 -28  -6   24.44   10.19
   1 -28  -6   17.67    7.88
   1  28   6    7.91   22.57
  -1  28  -6   22.70    8.55
  -1  29   6    7.23    6.20
  -1 -29  -6    3.37    4.37
  -1  29   6    3.20   11.46
   1  29  -6    5.80    4.79
   1  29  -6   -0.30    4.39
  -1 -29  -6   -0.18    5.87
  -1  29  -6    4.55    5.67
   1 -29  -6    8.33    6.66
  -1 -29   6    5.42    2.68
   1 -29  -6    5.60    5.04
   1  29   6    4.83   15.15
  -1  29  -6    5.39    5.71
  -1 -30  -6    0.14    4.28
  -1 -30  -6    0.95    2.92
  -1  30   6    3.12    7.93
   1  30  -6    0.63    3.45
   1  30  -6   -0.05    3.29
   1 -30  -6    2.05    3.53
   1 -30  -6    2.38    5.92
  -1 -30   6    0.75    1.51
   1  30   6   -1.21   13.26
  -1  30  -6    0.33    5.00
  -1  30  -6    2.50    4.26
  -1 -31  -6    0.25    5.24
   1 -31   6   -0.43    3.80
  -1  31   6    0.16    6.06
  -1  31   6    0.51    9.41
   1  31  -6    0.29    8.77
   1  31  -6    2.00    4.18
   1  31   6   -0.46   16.21
  -1  31  -6   25.47    6.75
   1 -31  -6    4.45    6.92
   1 -31  -6    0.26    7.54
  -1  31  -6   -0.03    5.24
   1 -32   6    1.08    2.99
  -1  32   6    3.96    6.73
  -1 -32  -6    4.00    4.05
  -1  32   6   -1.21    7.88
   1  32  -6   -0.51    3.38
   1  32  -6    0.36    3.60
  -1  32  -6   -0.74    5.00
  -1  32  -6   -0.32    3.91
   1 -32  -6   -0.46    2.79
   1 -32  -6    0.11    5.76
   1  32   6    2.58   18.97
  -1 -33  -6   -0.55    4.20
   1 -33   6    3.83    2.96
  -1  33   6    2.09    4.20
   1  33  -6    3.78    3.43
  -1  33   6   -7.21    5.97
   1 -33  -6   -4.66    5.27
   1 -33  -6   -0.71    2.42
  -1  33  -6   -2.80    3.71
   1 -34   6    5.35    3.81
  -1 -34  -6    6.37    4.99
  -1  34   6   -1.26    7.63
   1  34  -6    3.87    4.52
   1  34  -6   -5.02    7.64
   1  34   6    7.29   10.13
   1 -34  -6   -1.60    7.08
   1 -34  -6    0.84    2.59
  -1  34  -6   -7.75    4.79
  -1 -35  -6    4.93    5.77
  -1  35   6   -5.31    5.89
   1  35  -6   -4.37    4.21
   1  35  -6   -6.34    5.20
  -1  35   6    3.16    5.93
   1 -35   6   -6.48    4.51
   1  35   6   12.47   11.55
   1 -35  -6   -4.01    8.38
  -1  35  -6   -0.26    5.17
   1  36  -6    2.51    3.54
  -1  36  -6   -1.16    5.29
  -1  36  -6   -2.74    3.34
   1 -36  -6    6.17    6.51
  -1   0  -7  101.81   23.27
  -1   0  -7   88.97   16.05
  -1   0   7   76.49   31.61
  -1   0   7  102.52   16.71
   1   0  -7   68.53   10.89
   1   0  -7   85.25   11.86
  -1   0  -7   98.75    8.54
  -1  -1  -7    6.89    9.14
  -1   1   7    8.66   12.94
  -1   1   7    8.30    5.89
   1   1  -7    6.70    4.13
   1   1  -7    7.35    2.05
   1   1  -7    8.23    4.17
   1   1  -7    4.52    2.28
  -1  -1  -7    7.60    2.32
  -1  -1  -7    9.39    6.09
  -1   1  -7   -0.38    4.22
  -1   1  -7    9.81    6.26
  -1   1  -7    6.29    9.02
  -1   1  -7    6.88    4.37
   1  -1  -7    8.33    4.12
   1  -1  -7    8.12    4.47
   1  -1  -7    5.37    4.00
  -1  -1   7    8.35    8.39
  -1  -1   7    8.54   12.76
  -1  -2  -7    8.66    6.01
  -1  -2  -7    8.13    9.19
  -1   2   7    6.84   12.93
  -1   2   7    7.46    6.52
   1   2  -7    7.00    4.39
   1   2  -7    6.97    2.35
   1   2  -7    8.79    3.95
   1   2  -7    5.89    4.20
  -1  -2  -7    9.89    4.00
  -1   2  -7    6.06    8.84
  -1   2  -7    7.52    5.97
   1  -2  -7    9.65    4.39
   1  -2  -7    9.68    4.22
   1  -2  -7    6.73    4.64
  -1  -2   7    9.10   12.72
  -1  -2   7    3.00    3.18
  -1   2  -7    0.00    4.45
   1   2   7    3.66    7.02
  -1   2  -7    6.81    2.34
  -1  -3  -7   37.73   14.29
  -1  -3  -7   28.78    9.35
  -1   3   7   32.27   11.40
  -1   3   7   26.61   19.59
   1   3  -7   29.41    6.27
   1   3  -7   27.72    6.91
   1   3  -7   27.16    7.02
   1   3  -7   23.40    4.24
  -1  -3  -7   28.50    6.14
  -1   3  -7   35.00   13.76
  -1   3  -7   25.20    8.59
  -1   3  -7   29.78    7.34
   1  -3  -7   29.27    7.27
   1  -3  -7   30.78    7.01
   1  -3  -7   -0.45   12.09
  -1  -3   7   42.11   19.31
  -1   3  -7   26.40    4.29
   1   3   7   23.35   11.98
  -1  -4  -7   25.89    5.74
  -1  -4  -7   26.90    9.21
  -1   4   7   26.78   11.88
   1   4  -7   25.23    6.54
   1   4  -7   22.86    4.04
   1   4  -7   21.86    5.21
   1   4  -7   21.57    6.73
  -1  -4  -7   32.60   13.90
  -1   4  -7   24.47    4.29
   1   4   7   18.39   12.17
   1  -4  -7   24.30    6.67
   1  -4  -7   26.99    7.67
   1  -4  -7   22.86    6.97
  -1  -4   7   38.41   18.47
  -1   4  -7   23.56    8.38
  -1   4  -7   20.24    3.53
  -1  -5  -7   51.89    7.76
  -1  -5  -7   62.69   18.05
  -1  -5  -7   50.23   12.05
  -1   5   7   47.93   16.14
   1   5  -7   46.22    9.26
   1   5  -7   51.54    8.85
   1   5  -7   49.87    6.22
   1   5  -7   47.08    7.29
  -1   5  -7   48.22    5.89
  -1   5  -7   44.21   11.19
  -1   5  -7   47.58    5.89
   1  -5  -7   47.60    9.26
   1  -5  -7   47.84    9.23
  -1  -5   7   50.14   23.48
   1   5   7   38.15   16.15
   1  -6   7   33.99   17.13
  -1  -6  -7   36.99   13.88
  -1  -6  -7   21.24    9.17
  -1   6   7   18.45   13.14
   1   6  -7   25.15    6.48
   1   6  -7   25.11    4.80
   1   6  -7   21.84    5.10
   1   6  -7   22.47    7.06
  -1  -6  -7   25.65    5.41
  -1   6  -7   22.93    7.01
   1   6   7   15.26   12.97
   1  -6  -7   22.80    6.87
   1  -6  -7   23.39   11.71
   1  -6  -7   21.55    7.43
  -1  -6   7   32.81   17.65
  -1   6  -7   21.43    8.41
  -1   6  -7   22.26    4.29
  -1   6  -7   22.81    4.39
   1  -7   7   13.88   13.44
  -1  -7  -7   18.13   10.92
  -1  -7  -7   12.90    4.16
  -1  -7  -7   16.10    7.30
  -1   7   7   15.65   11.12
   1   7  -7   14.02    5.30
   1   7  -7   13.93    4.09
   1   7  -7   10.46    4.01
   1   7  -7   13.05    5.56
   1   7   7    8.47   11.17
  -1   7  -7   13.43    5.68
  -1   7  -7   13.06    6.67
   1  -7  -7   13.93    5.51
   1  -7  -7    0.00    5.91
   1  -7  -7   15.73    5.84
  -1  -7   7   15.15   13.97
  -1   7  -7   10.56    3.37
  -1   7  -7    9.79    3.31
  -1  -8  -7   99.52   10.47
  -1   8   7   85.01   26.08
  -1   8   7   85.36   10.68
   1   8  -7   91.92   14.04
   1   8  -7   99.39   11.39
   1   8  -7  102.64   13.21
   1   8  -7   86.08   10.30
   1  -8   7   87.22   27.06
  -1  -8  -7  124.90   24.39
  -1  -8  -7   92.34   16.55
   1   8   7   69.07   26.58
  -1   8  -7   93.62   14.25
  -1   8  -7   92.30    9.83
  -1   8  -7   95.08   16.28
   1  -8  -7   96.18   13.77
   1  -8  -7   91.06   13.13
   1  -8  -7   96.97   14.25
  -1  -8   7   99.89   29.95
  -1   8  -7   87.38    9.88
   1  -9   7   35.70   17.36
  -1  -9  -7   48.58   15.82
  -1  -9  -7   38.45   10.77
  -1   9   7   32.44    6.83
  -1   9   7   36.46   18.98
   1   9  -7   34.70    6.97
   1   9  -7   41.72    8.12
   1   9  -7   37.23    6.81
   1   9  -7   33.48    8.93
  -1  -9  -7   44.93    6.72
  -1   9  -7   35.75    6.37
  -1   9  -7   34.54   10.33
  -1   9  -7   36.50    6.20
   1   9   7   31.19   18.52
   1  -9  -7   38.26    8.91
   1  -9  -7   36.24    8.39
   1  -9  -7   39.08    9.67
  -1  -9   7   42.50   19.80
  -1   9  -7   37.69    8.80
  -1 -10  -7   81.67   20.57
  -1 -10  -7   63.17   13.76
  -1 -10  -7   73.48    8.56
  -1  10   7   52.71   23.48
  -1  10   7   58.67    9.27
   1  10  -7   59.75    9.59
   1  10  -7   64.57    8.88
   1  10  -7   65.78   19.56
   1 -10   7   67.18   20.20
  -1  10  -7   62.48    9.10
  -1  10  -7   62.82    8.54
  -1  10  -7   64.80   13.48
   1 -10  -7   66.94   11.08
   1 -10  -7   65.90   12.50
   1 -10  -7   61.17   10.76
   1 -10  -7   90.70   17.28
  -1 -10   7   77.04   25.06
   1  10   7   39.70   24.24
  -1  10  -7   60.68   11.34
  -1 -11  -7   27.37   12.46
   1 -11   7   27.83   11.92
  -1 -11  -7   19.69    8.39
  -1  11   7   16.35    5.46
  -1  11   7   21.60   15.48
   1  11  -7   17.09    5.99
   1  11  -7   18.23    5.18
   1  11  -7   18.18    4.77
   1  11  -7   17.40    6.26
  -1 -11  -7   20.41    4.38
  -1  11  -7   18.67    7.96
  -1  11  -7   16.74    4.74
   1 -11  -7   19.89    7.67
   1 -11  -7   17.51    6.51
   1 -11  -7   15.10    6.47
   1 -11  -7   25.23   10.55
  -1 -11   7   16.65   14.35
  -1  11  -7   17.53    6.68
   1  11   7   13.15   15.68
  -1  11  -7   19.55    5.71
   1 -12   7   69.35   17.92
  -1  12   7   56.76   25.11
  -1  12   7   52.50    9.63
   1  12  -7   55.19   10.87
   1  12  -7   60.84   10.65
   1  12  -7   68.07    9.52
   1  12  -7   56.77    7.55
  -1 -12  -7   88.16   19.97
  -1 -12  -7   72.90    7.89
  -1 -12  -7   67.65   23.44
  -1  12  -7   64.66   13.27
  -1  12  -7   58.80    9.65
   1 -12  -7   88.76   16.93
   1 -12  -7   68.64   13.17
   1 -12  -7   66.65   10.79
   1 -12  -7   62.30   10.71
  -1 -12   7   51.10   12.64
  -1  12  -7   65.51    9.08
   1  12   7   44.76   26.70
  -1  12  -7   60.92   11.48
  -1 -13  -7   85.49   16.40
  -1  13   7   74.06   30.14
  -1  13   7   70.87   11.60
   1  13  -7   87.82   10.71
   1  13  -7   82.87   13.02
   1  13  -7   74.86    8.66
   1  13  -7   77.33   13.00
  -1 -13  -7  113.36   22.91
  -1 -13  -7  103.78    9.71
   1 -13   7   98.48   19.78
  -1  13  -7   78.69   11.84
  -1  13  -7   82.13   14.35
  -1  13  -7   89.70   11.15
   1  13   7   67.31   32.20
   1 -13  -7   83.63   12.54
   1 -13  -7  125.65   18.52
   1 -13  -7   89.14   15.21
   1 -13  -7   84.28   12.35
  -1 -13   7   66.40   14.64
  -1  13  -7   78.59   13.19
  -1 -14  -7  102.89    9.58
   1 -14   7  102.38   19.42
  -1 -14  -7  121.29   23.47
  -1  14   7   72.62   12.05
  -1  14   7   76.10   30.94
   1  14  -7   80.13   13.68
   1  14  -7   80.13   13.15
   1  14  -7   85.33   10.34
  -1 -14  -7   93.87   16.89
  -1  14  -7   85.47   13.60
  -1  14  -7   86.26   14.79
  -1  14  -7   82.65   16.06
   1  14   7   67.10   34.06
   1 -14  -7   92.34   15.80
   1 -14  -7   93.46   13.14
   1 -14  -7  125.49   18.61
   1 -14  -7   83.92   12.68
  -1 -14   7   74.35   15.26
  -1  14  -7   85.47   12.85
   1 -15   7   27.81    7.21
  -1  15   7   31.94    7.91
  -1  15   7   40.33   22.19
   1  15  -7   35.96    8.84
   1  15  -7   36.71    8.69
   1  15  -7   36.29    5.91
  -1 -15  -7   56.09   15.94
  -1 -15  -7   43.99   11.08
  -1  15  -7   35.88    9.29
  -1  15  -7    5.35    7.97
  -1  15  -7   34.61    6.81
   1  15   7   22.72   23.30
  -1  15  -7   38.74    8.59
   1 -15  -7   37.49    8.00
   1 -15  -7   41.25    8.02
   1 -15  -7   64.77   12.52
   1 -15  -7   39.92   10.60
  -1 -15   7   33.87    9.98
   1 -16   7   37.29    7.84
  -1  16   7   42.92   23.68
  -1  16   7   34.16    8.23
   1  16  -7   38.75    9.34
   1  16  -7   39.97    9.34
   1  16  -7   41.72    6.55
  -1 -16  -7   47.91   11.85
  -1  16  -7   41.54    9.89
   1 -16  -7   43.87    9.25
   1 -16  -7   67.37   12.59
   1 -16  -7   44.63    8.33
   1 -16  -7   44.97   11.13
  -1 -16   7   42.20   10.80
   1  16   7   28.93   25.70
  -1  16  -7   39.42    7.46
  -1  16  -7   42.93    9.23
  -1  16  -7   47.25    9.58
   1 -17   7   86.68   11.55
  -1 -17  -7  149.77   24.68
  -1  17   7   83.01   13.05
  -1  17   7   92.88   31.96
   1  17  -7   93.45   14.21
   1  17  -7   95.33   14.13
   1  17  -7   89.45    9.50
  -1 -17  -7  110.85   17.30
  -1  17  -7   94.64   14.63
  -1  17  -7   94.20   12.26
   1 -17  -7  102.56   16.71
   1 -17  -7  152.85   18.59
   1 -17  -7  100.25   14.44
   1 -17  -7   99.06   12.35
  -1 -17   7  105.80   16.47
  -1  17  -7   89.49   13.35
   1  17   7   59.85   35.37
  -1  17  -7  102.59   14.96
  -1 -18  -7   52.13   14.47
   1 -18   7   33.66    6.75
  -1  18   7   33.82   19.80
  -1  18   7   36.19    8.43
   1  18  -7   33.57    8.23
   1  18  -7   50.27    8.68
   1  18  -7   36.16    8.84
  -1 -18  -7   42.72   10.65
  -1  18  -7   38.71    7.35
  -1  18  -7   36.19    8.41
  -1  18  -7   38.92    8.43
   1  18   7   22.15   23.95
   1 -18  -7   42.95   10.52
   1 -18  -7   39.58    8.43
   1 -18  -7   40.42    7.41
  -1 -18   7   46.76   10.65
  -1  18  -7   41.71    9.12
  -1 -19  -7    2.58    4.14
  -1 -19  -7    4.62    5.52
  -1  19   7    0.59    8.54
  -1  19   7    2.89    3.26
   1  19  -7    1.47    3.13
   1  19  -7    2.17    3.62
   1  19   7    2.24   10.38
  -1  19  -7    2.12    3.17
  -1  19  -7    3.17    2.80
  -1  19  -7    1.62    3.49
   1 -19  -7    1.99    2.99
   1 -19  -7    1.75    3.22
   1 -19  -7    2.20    4.29
  -1 -19   7    3.09    4.12
  -1  19  -7    1.63    3.49
  -1 -20  -7    1.91    5.34
  -1  20   7    2.39    3.35
  -1  20   7    2.95    8.77
   1  20  -7    2.92    3.68
  -1 -20  -7    3.03    4.31
   1  20   7    3.39   10.67
  -1  20  -7    2.07    3.51
  -1  20  -7    2.08    3.13
   1 -20  -7    3.04    4.51
   1 -20  -7    3.17    2.93
  -1 -20   7    3.22    4.04
  -1  20  -7    2.41    2.99
  -1  20  -7    1.33    3.68
  -1  21   7   25.23    7.71
  -1  21   7   35.56   19.11
   1  21  -7   33.21    8.37
   1  21  -7   31.96   15.82
  -1 -21  -7   42.13   12.04
  -1 -21  -7   45.00   10.37
   1  21   7   20.84   21.73
   1 -21  -7   28.69    6.95
   1 -21  -7   35.71   10.30
  -1 -21   7   42.88    9.04
  -1  21  -7   34.32    7.88
  -1  21  -7   28.78    7.17
  -1  21  -7   29.86    8.52
  -1  21  -7   31.41    8.10
  -1 -22  -7   -0.01    6.34
  -1  22   7   13.59    5.16
   1  22  -7   -0.32    5.20
   1  22  -7   -0.20    5.95
  -1 -22  -7   16.73    7.14
  -1  22  -7   12.47    4.46
  -1  22  -7   11.76    4.84
  -1  22  -7    0.09    5.67
   1 -22  -7   13.46    6.87
   1 -22  -7   11.40    4.05
  -1 -22   7   12.58    4.28
   1  22   7   -0.05   15.15
  -1 -23  -7   35.15   10.84
  -1  23   7   24.76    7.52
   1  23  -7   27.83    8.62
   1  23  -7   21.48    7.48
  -1 -23  -7   30.87    9.37
  -1  23  -7   22.62    7.06
   1  23   7   -0.01   21.59
   1 -23  -7   21.18    7.48
   1 -23  -7   21.02    6.27
   1 -23  -7   27.64    9.77
  -1 -23   7   25.82    6.20
  -1  23  -7   25.20    6.34
  -1  23  -7   23.77    8.37
  -1 -24  -7    0.04    3.63
  -1 -24  -7    1.50    3.81
  -1  24   7   -0.72    2.89
   1  24  -7    0.20    2.91
   1  24  -7    0.01    3.29
   1 -24   7    1.80    3.05
  -1  24  -7    0.99    2.81
  -1  24  -7    0.66    2.20
   1  24   7    0.14    8.94
   1 -24  -7    0.36    2.17
   1 -24  -7    1.42    2.78
   1 -24  -7    0.97    3.92
  -1 -24   7   -0.07    2.32
  -1  24  -7    0.09    3.29
  -1 -25  -7   -0.45    5.34
  -1  25   7    3.53    3.87
   1  25  -7    0.26    4.04
   1  25  -7    4.41    4.81
  -1 -25  -7    3.89    5.01
  -1  25  -7    4.88    3.08
  -1  25  -7    0.28    7.93
   1  25   7    6.01   13.15
  -1  25  -7    3.75    4.06
   1 -25  -7   -0.16    4.54
   1 -25  -7    3.39    4.29
   1 -25  -7    3.10    5.67
  -1 -25   7    3.55    3.24
  -1 -26  -7    0.08    5.97
  -1  26   7    4.41    4.03
   1  26  -7    3.96    5.12
   1  26  -7    0.36    4.31
  -1 -26  -7    5.34    4.89
  -1  26  -7    0.01    5.56
  -1  26  -7    2.53    4.10
   1 -26  -7    3.34    4.00
   1 -26  -7    4.16    6.02
  -1 -26   7    4.99    3.00
   1  26   7    4.03   14.25
  -1  26  -7    4.37    3.18
  -1 -27  -7    0.04    3.49
  -1  27   7   -1.32    2.43
   1  27  -7    0.96    3.45
   1  27  -7    0.21    2.58
  -1 -27  -7    0.75    2.59
  -1  27  -7    1.41    1.64
   1  27   7   -3.99   10.22
   1 -27  -7    0.17    4.24
   1 -27  -7   -1.25    2.47
  -1 -27   7    0.00    1.66
  -1  27  -7   -1.07    3.56
  -1  27  -7   -0.39    3.93
  -1  28   7    3.26    4.46
  -1  28   7    5.50   14.69
   1  28  -7    0.20    4.91
   1  28  -7    5.52    5.71
  -1 -28  -7    1.54    4.56
  -1  28  -7    7.52    6.67
   1 -28  -7    9.23    7.98
   1 -28  -7    0.08    4.49
  -1 -28   7    4.22    2.88
   1  28   7    8.97   18.15
  -1  28  -7    7.52    7.18
   1 -29   7   14.29    4.30
  -1  29   7    1.05    4.93
  -1  29   7    2.50   14.80
   1  29  -7    0.38    5.12
   1  29  -7    2.67    5.72
   1  29   7    0.08   36.59
  -1  29  -7    2.51    7.64
   1 -29  -7   -0.58    4.04
   1 -29  -7    5.41    8.42
  -1  29  -7    5.56    6.96
   1 -30   7    0.03    3.84
  -1  30   7   12.26   11.79
  -1  30   7    0.71    4.34
   1  30  -7    1.88    4.77
   1  30  -7    3.31    4.35
   1 -30  -7   -0.63    3.26
   1 -30  -7    1.32    7.43
  -1  30  -7    4.76    6.52
  -1  30  -7   13.84    6.26
   1 -31   7    2.33    4.62
  -1  31   7  -11.26   13.63
   1  31  -7    4.74    6.14
  -1 -31  -7   -3.10    7.13
   1 -31  -7   46.46    9.14
   1  31   7    5.97   17.27
  -1  31  -7   -2.55    7.83
   1 -32   7   12.76    8.06
  -1  32   7    5.52   10.97
  -1 -32  -7   -0.62    6.05
   1  32  -7    4.17    5.76
  -1  32  -7    3.92    6.60
   1 -32  -7   -2.16    8.02
  -1  32  -7   -2.93    6.62
   1 -33   7   21.84    4.64
  -1 -33  -7    4.54    9.68
   1  33  -7   -3.35    9.21
   1 -33  -7    8.23   12.79
  -1  33  -7   26.51   10.34
  -1  33  -7  -10.85   10.04
  -1   0  -8    2.07    4.45
  -1   0   8    3.00    9.42
   1   0  -8    1.76    3.03
   1   0  -8    1.83    3.08
   1   0  -8    2.83    3.38
  -1   0  -8    2.80    7.05
  -1   0  -8    0.00    3.22
  -1  -1  -8    0.07    5.16
  -1   1   8   15.11   15.44
  -1   1   8    4.62    4.20
   1   1  -8   14.44    4.87
   1   1  -8   17.84    5.62
   1   1  -8   14.84    4.83
  -1  -1  -8   17.11   11.69
  -1  -1  -8   16.23    7.31
   1  -1  -8   16.26    5.71
   1  -1  -8   14.46    4.84
   1  -1  -8   13.54    5.02
  -1  -1   8   16.53   15.21
  -1   1  -8   13.36    6.89
  -1   1  -8    0.01    5.39
  -1  -2  -8   13.82   11.48
  -1  -2  -8    0.03    4.75
  -1  -2  -8   12.67    7.10
  -1   2   8   10.76    6.70
  -1   2   8   15.96   14.27
   1   2  -8   10.81    4.75
   1   2  -8   14.50    5.29
   1   2  -8   10.54    4.06
  -1   2  -8   10.05    6.70
  -1   2  -8    0.03    5.27
   1  -2  -8   13.17    5.01
   1  -2  -8   11.10    4.55
   1  -2  -8   11.88    5.39
  -1  -2   8   12.80   14.32
  -1  -3  -8    0.00    5.71
  -1  -3  -8   29.65   13.98
  -1   3   8   23.68   17.64
  -1   3   8   21.74    8.84
   1   3  -8   16.71    5.99
   1   3  -8   18.68    4.95
   1   3  -8   22.14    6.31
  -1  -3  -8   23.19    8.66
   1  -3   8   23.51   17.98
  -1   3  -8   17.46    6.50
  -1   3  -8   21.14    8.18
  -1   3  -8   17.82    3.43
   1  -3  -8   17.09    6.48
   1  -3  -8   18.67    5.49
   1  -3  -8   21.05    6.22
  -1  -3   8   25.01   17.19
  -1  -4  -8   40.67   12.79
  -1   4   8   10.79    7.30
  -1   4   8   13.64   14.17
   1   4  -8   12.96    5.08
   1   4  -8   11.50    3.97
   1   4  -8   11.01    4.99
  -1  -4  -8   -0.03    8.10
   1  -4   8   17.67   14.55
  -1  -4  -8   11.94    7.17
  -1   4  -8   10.29    6.66
   1  -4  -8   10.55    4.35
   1  -4  -8   -0.01    5.21
   1  -4  -8   11.77    5.04
  -1  -4   8   13.32   14.05
  -1   4  -8   -0.09    5.49
  -1   4  -8    9.06    2.80
  -1  -5  -8   67.26    9.62
   1  -5   8   56.82   27.54
  -1  -5  -8   87.42   23.28
  -1   5   8   57.79   28.08
   1   5  -8   60.68    7.16
   1   5  -8   60.44    8.54
   1   5  -8   62.28   10.51
   1   5  -8   62.45   10.85
  -1  -5  -8   65.98   14.05
  -1   5  -8   61.36   13.15
  -1   5  -8   61.47    7.06
   1  -5  -8   57.60   10.48
   1  -5  -8   54.75    8.92
   1  -5  -8   62.94   10.71
  -1  -5   8   63.03   26.35
  -1   5  -8   57.19   11.43
  -1  -6  -8    7.31    9.69
  -1   6   8    5.97   12.43
   1   6  -8    8.35    4.30
   1   6  -8    5.62    2.79
   1   6  -8    6.37    4.46
   1   6  -8    8.12    3.59
   1  -6   8   10.80   11.64
  -1  -6  -8    0.00    3.68
  -1  -6  -8    7.62    6.13
  -1   6  -8    5.97    5.67
  -1   6  -8    0.03    4.81
   1  -6  -8    6.71    4.54
   1  -6  -8   -0.01    4.39
   1  -6  -8    8.73    7.55
   1   6   8    4.91    8.46
  -1  -6   8    9.97   11.79
  -1   6  -8    7.63    2.60
  -1  -7  -8   49.27   17.98
   1  -7   8   39.36   20.43
  -1  -7  -8   41.07    7.18
  -1   7   8   45.58   22.43
  -1  -7  -8   42.40   11.83
   1   7  -8   37.63    8.91
   1   7  -8   39.09    7.09
   1   7  -8   43.12    8.93
   1   7  -8   40.47    6.46
   1   7   8   28.90   16.81
  -1   7  -8   41.84   11.00
  -1   7  -8   40.24    5.87
   1  -7  -8   41.87    8.63
   1  -7  -8   40.54    9.04
   1  -7  -8   38.28    8.37
  -1  -7   8   41.78   21.45
  -1   7  -8   40.41    9.22
   1  -8   8   53.69   20.70
  -1  -8  -8   53.18   12.90
  -1  -8  -8   66.20   19.59
  -1  -8  -8   62.19    8.62
  -1   8   8   50.84   23.26
   1   8  -8   53.18   17.36
   1   8  -8   52.34    7.81
   1   8  -8   51.96    7.25
  -1   8  -8   53.06   11.98
  -1   8  -8   46.00    6.46
  -1   8  -8   41.04    6.66
   1   8   8   36.34   18.52
   1  -8  -8   52.81   10.14
   1  -8  -8   48.37    9.04
   1  -8  -8   53.23    9.41
  -1   8  -8   54.10   10.50
  -1  -8   8   62.20   22.90
   1  -9   8   30.46   14.89
  -1  -9  -8   39.41   14.98
  -1   9   8   41.04   17.56
  -1  -9  -8   33.81    6.09
  -1  -9  -8   25.97    9.89
   1   9  -8   22.91    7.08
   1   9  -8   27.54    5.63
   1   9  -8   31.15    7.04
   1   9  -8   27.22    5.80
  -1   9  -8   28.50    9.01
   1   9   8   22.22   15.25
  -1   9  -8   23.31    4.68
   1  -9  -8   27.37    6.96
   1  -9  -8   26.22    6.89
   1  -9  -8   27.33    7.91
  -1  -9   8   37.36   17.39
  -1   9  -8   27.53    7.75
  -1   9  -8   23.11    5.02
   1 -10   8   25.27   11.40
  -1 -10  -8   26.44   12.26
  -1  10   8   18.52   13.85
  -1  10   8   11.96   12.50
  -1 -10  -8   21.40    8.05
  -1 -10  -8   19.35    4.56
   1  10  -8   14.54    4.25
   1  10  -8   16.69    4.87
   1  10  -8   16.36    5.33
   1  10  -8   14.29    5.76
  -1  10  -8   15.71    7.21
   1  10   8   12.61   13.23
   1 -10  -8   15.43    5.39
   1 -10  -8   13.36    5.62
   1 -10  -8   16.00    6.48
  -1  10  -8   15.42    3.87
  -1  10  -8   10.67    4.12
  -1  10  -8   15.38    6.23
  -1 -10   8   14.93    7.31
   1  11  -8   68.32   11.27
   1  11  -8   80.25   10.58
   1  11  -8   72.06    8.48
  -1 -11  -8   98.62   21.15
  -1  11   8   71.65   22.93
  -1  11   8   61.72   24.89
  -1 -11  -8   90.53    9.29
  -1 -11  -8   75.04   13.92
   1 -11   8   82.92   20.18
   1  11  -8   77.37   10.42
  -1  11  -8   77.36   12.43
  -1  11  -8   83.75   14.02
   1  11   8   57.79   25.27
   1 -11  -8   76.40   12.44
   1 -11  -8   69.56   10.06
   1 -11  -8   79.40   11.08
  -1  11  -8   76.37    8.83
  -1  11  -8   65.34    9.26
  -1 -11   8   58.39   13.43
  -1 -12  -8   16.59   10.09
  -1 -12  -8   13.93    3.83
  -1  12   8   14.40   11.61
  -1  12   8   15.67   11.59
  -1 -12  -8   14.14    6.48
   1 -12   8   19.14    8.89
   1  12  -8   11.79    4.41
   1  12  -8   12.08    5.02
   1  12  -8   13.43    4.43
  -1  12  -8   10.05    3.55
  -1  12  -8   11.33    5.37
  -1  12  -8   10.06    5.75
  -1  12  -8   10.59    4.10
   1 -12  -8   14.21    5.34
   1 -12  -8   13.55   10.46
   1 -12  -8   -0.05    4.39
   1  12   8    9.47   12.13
  -1 -12   8   10.30    6.58
   1 -13   8   21.52    9.50
  -1 -13  -8   20.14    4.13
  -1  13   8   15.61   12.17
  -1  13   8   19.17   13.27
  -1 -13  -8   27.40   11.21
  -1 -13  -8   19.42    7.56
   1  13  -8   18.56    4.72
   1  13  -8   14.59    5.87
   1  13  -8   17.78    5.29
  -1  13  -8   14.60    4.47
  -1  13  -8   17.73    6.01
  -1  13  -8   15.09    6.34
  -1  13  -8   18.60    5.09
   1  13   8   15.72   14.29
   1 -13  -8   -0.04    5.25
   1 -13  -8   20.07    5.92
   1 -13  -8   19.38    6.98
  -1 -13   8   17.11    7.31
   1  14  -8   13.13    5.29
   1  14  -8   16.17    4.96
   1 -14   8   10.22    4.84
  -1 -14  -8   16.78    6.96
  -1  14   8   11.77   11.77
  -1  14   8   12.47   10.42
  -1 -14  -8   20.57    9.83
  -1 -14  -8   16.09    3.54
   1  14  -8   12.51    4.01
  -1 -14   8   12.54    6.63
  -1  14  -8   14.39    5.52
  -1  14  -8   13.89    4.88
  -1  14  -8   -0.13    5.50
  -1  14  -8   11.89    4.10
   1  14   8   10.88   13.42
   1 -14  -8    0.00    4.62
   1 -14  -8   16.78    5.29
   1 -14  -8   14.42    6.37
   1  15  -8   88.54   10.05
   1 -15   8   95.30   11.72
  -1 -15  -8  128.90   21.87
  -1  15   8   89.37   26.08
  -1  15   8   64.28   22.24
  -1 -15  -8   93.17   16.32
   1  15  -8   91.22   12.55
   1  15  -8   85.70   13.51
  -1  15  -8   92.91   14.09
  -1  15  -8   94.12   11.61
  -1  15  -8   81.15   11.60
  -1  15  -8   99.01   14.13
   1 -15  -8   99.06   14.89
   1 -15  -8  101.10   13.85
   1  15   8   68.62   30.39
  -1 -15   8   90.30   15.34
   1  16  -8   14.92   11.10
   1 -16   8   10.73    4.72
  -1 -16  -8   14.84    7.34
  -1  16   8   19.07   10.18
  -1  16   8   15.02   13.11
  -1 -16  -8   18.48    9.58
   1  16  -8   11.19    5.47
   1  16  -8   11.38    3.83
  -1  16  -8   15.46    5.70
  -1  16  -8   16.09    5.17
  -1  16  -8   13.69    5.71
  -1  16  -8   12.97    4.72
   1  16   8   12.14   14.67
   1 -16  -8   -0.05    4.67
   1 -16  -8   17.57    6.55
  -1 -16   8   16.90    6.84
   1  17  -8   28.37    7.52
   1  17  -8   23.57    7.45
   1 -17   8   21.68    5.76
  -1  17   8   24.62   12.59
  -1  17   8    0.01   16.57
  -1 -17  -8   39.01   12.25
  -1 -17  -8   29.68    9.39
   1  17  -8   30.54    8.14
  -1  17  -8   23.83    7.41
  -1  17  -8   27.94    7.50
  -1  17  -8   26.26    6.42
   1  17   8   -0.21   18.90
   1 -17  -8   28.89    8.60
   1 -17  -8   22.76    6.13
  -1 -17   8   28.08    8.71
  -1  17  -8   24.66    6.98
   1 -18   8   28.27    5.97
  -1 -18  -8   35.03   10.22
  -1  18   8   -0.14   17.01
  -1 -18  -8   39.80   13.08
   1  18  -8   29.37    4.89
   1  18  -8   25.48    7.93
   1  18  -8   32.00    8.37
[truncated: 635,521 more chars]
