# Supplementary material
Source: MDPI journal article supplement (https://www.mdpi.com/2073-4352/7/1/7)
Supplement: s1 [file s1 › beta.cif]

data_General
_audit_creation_date                    2013-11-25
_audit_creation_method                 'by CrystalStructure 4.0'
_audit_update_record                    ?

#==============================================================================
# PROCESSING SUMMARY (IUCr Office Use Only)

_journal_date_recd_electronic           ?
_journal_date_from_coeditor             ?
_journal_date_accepted                  ?
_journal_coeditor_code                  ?

#==============================================================================
# SUBMISSION DETAILS

_publ_contact_author_name              'ENTER NAME'
_publ_contact_author_email             'ENTER EMAIL ADDRESS'
_publ_contact_author_fax               'ENTER FAX NUMBER'
_publ_contact_author_phone             'ENTER PHONE NUMBER'
_publ_contact_letter
;
    ENTER TEXT OF LETTER
;
_publ_requested_journal                test
_publ_requested_category               'CHOOSE FI FM FO CI CM CO or AD'
_publ_requested_coeditor_name           ?

#==============================================================================
# TITLE AND AUTHOR LIST

_publ_section_title
;
    ENTER SECTION TITLE
;
_publ_section_title_footnote
;
    ENTER FOOTNOTE TO TITLE OF PAPER
;
loop_
_publ_author_name
_publ_author_footnote
_publ_author_address
' FIRST AUTHORS NAME '
;
  FIRST AUTHORS FOOTNOTES
;
;
  FIRST AUTHORS ADDRESS
;
_publ_section_synopsis
;
    ENTER SYNOPSIS
;

#==============================================================================
# TEXT

_publ_section_abstract
;
    ENTER ABSTRACT
;
_publ_section_comment
;
    ENTER TEXT
;
_publ_section_references
;
    ENTER OTHER REFERENCES

    Johnson, C.K. (1976). ORTEP-II. A FORTRAN Thermal-Ellipsoid Plot
    Program. Report ORNL-5138. Oak Ridge National Laboratory, 
    Tennessee, USA.

    Rigaku (1998). PROCESS-AUTO. Automatic Data Acquisition and Processing
    Package for Imaging Plate Diffractometer. Rigaku Corporation, Tokyo
    196-8666, Japan

    Rigaku (2000-2010). CrystalStructure 4.0.1: Crystal Structure Analysis 
    Package.  Rigaku Corporation, Tokyo 196-8666, Japan.
    
    Sheldrick, G.M. (1997). SHELXS97. Program for the Solution of Crystal
    Structures. University of Gottingen, Germany.

    Sheldrick, G.M. (1997). SHELXL97. University of Gottingen, Germany.

;
_publ_section_figure_captions
;
    ENTER FIGURE CAPTIONS
;
_publ_section_exptl_prep
;
    ENTER COMPOUND PREPARATION DETAILS
;
_publ_section_exptl_refinement
;
    ENTER SPECIAL DETAILS OF THE REFINEMENT
;

#==============================================================================
data_223K

#==============================================================================
# CHEMICAL DATA

_chemical_formula_sum                  'C23 H31 N O'
_chemical_formula_moiety               'C23 H31 N O'
_chemical_formula_weight                337.50
_chemical_melting_point                 ?
_chemical_absolute_configuration        ad

#==============================================================================
# CRYSTAL DATA
_symmetry_cell_setting                  monoclinic
_symmetry_space_group_name_H-M         'P 1 21 1'
_symmetry_space_group_name_Hall        'P 2yb'
_symmetry_Int_Tables_number             4
loop_
_symmetry_equiv_pos_site_id
_symmetry_equiv_pos_as_xyz
1   '+X,+Y,+Z'
2   '-X,1/2+Y,-Z'
#------------------------------------------------------------------------------
_cell_length_a                          6.20653(11)
_cell_length_b                          34.8358(7)
_cell_length_c                          9.92593(18)
_cell_angle_alpha                       90.0000
_cell_angle_beta                        92.7570(10)
_cell_angle_gamma                       90.0000
_cell_volume                            2143.59(7)
_cell_formula_units_Z                   4
_cell_measurement_reflns_used           39486
_cell_measurement_theta_min             3.81
_cell_measurement_theta_max             72.11
_cell_measurement_temperature           223
#------------------------------------------------------------------------------
_exptl_crystal_description              block
_exptl_crystal_colour                   yellow
_exptl_crystal_size_max                 1.000
_exptl_crystal_size_mid                 0.670
_exptl_crystal_size_min                 0.550
_exptl_crystal_density_diffrn           1.046
_exptl_crystal_density_meas             ?
_exptl_crystal_density_method          'not measured'
_exptl_crystal_F_000                    736.00
_exptl_absorpt_coefficient_mu           0.479
_exptl_absorpt_correction_type          numerical
_exptl_absorpt_process_details         'NUMABS (Rigaku, 1999)'
_exptl_absorpt_correction_T_min         0.651
_exptl_absorpt_correction_T_max         0.768

#==============================================================================
# EXPERIMENTAL DATA

_diffrn_ambient_temperature             223
_diffrn_radiation_type                 'Cu K\a'
_diffrn_radiation_wavelength            1.54187
_diffrn_measurement_device_type        'Rigaku R-AXIS RAPID'
_diffrn_measurement_method              \w
_diffrn_detector_area_resol_mean        10.000
_diffrn_reflns_number                   39375
_diffrn_reflns_av_R_equivalents         0.1058
_diffrn_reflns_theta_max                68.25
_diffrn_reflns_theta_full               68.25
_diffrn_measured_fraction_theta_max     0.989
_diffrn_measured_fraction_theta_full    0.989
_diffrn_reflns_limit_h_min             -7
_diffrn_reflns_limit_h_max              7
_diffrn_reflns_limit_k_min             -41
_diffrn_reflns_limit_k_max              41
_diffrn_reflns_limit_l_min             -11
_diffrn_reflns_limit_l_max              11
_diffrn_standards_number                0
_diffrn_standards_interval_count        .
_diffrn_standards_decay_%               ?

#==============================================================================
# REFINEMENT DATA

_refine_special_details
;
    Refinement was performed using all reflections. The weighted 
    R-factor (wR) and goodness of fit (S) are based on F^2^.
    R-factor (gt) are based on F. The threshold expression of
    F^2^ > 2.0 sigma(F^2^) is used only for calculating R-factor (gt).
;
_reflns_number_total                    7709
_reflns_number_gt                       7213
_reflns_threshold_expression            F^2^>2.0\s(F^2^)
_refine_ls_structure_factor_coef        Fsqd
_refine_ls_R_factor_gt                  0.0475
_refine_ls_wR_factor_ref                0.1325
_refine_ls_number_restraints            219
_refine_ls_hydrogen_treatment           constr
_refine_ls_number_reflns                7709
_refine_ls_number_parameters            494
_refine_ls_goodness_of_fit_ref          1.030
_refine_ls_weighting_scheme             calc
_refine_ls_weighting_details
           'w = 1/[\s^2^(Fo^2^)+(0.0717P)^2^+0.2029P] where P=(Fo^2^+2Fc^2^)/3'
_atom_sites_solution_hydrogens          geom
_atom_sites_solution_primary            direct
_atom_sites_solution_secondary          difmap
_refine_ls_shift/su_max                 0.011
_refine_diff_density_max                0.280
_refine_diff_density_min               -0.280
_refine_ls_extinction_method            SHELXL
_refine_ls_extinction_coef              0.0318(14)
_refine_ls_abs_structure_details
           'Flack, H. D. (1983), Acta Cryst. A39, 876-881.  3754 Friedel Pairs'
_refine_ls_abs_structure_Flack         -0.02(25)

loop_
_atom_type_symbol
_atom_type_description
_atom_type_scat_dispersion_real
_atom_type_scat_dispersion_imag
_atom_type_scat_source
  'C' 'C'  0.0181 0.0091 
;
International Tables for Crystallography
(1992, Vol. C, Tables 4.2.6.8 and 6.1.1.4)
;
  'H' 'H'  0.0000 0.0000 
;
International Tables for Crystallography
(1992, Vol. C, Table 6.1.1.4)
;
  'N' 'N'  0.0311 0.0180 
;
International Tables for Crystallography
(1992, Vol. C, Tables 4.2.6.8 and 6.1.1.4)
;
  'O' 'O'  0.0492 0.0322 
;
International Tables for Crystallography
(1992, Vol. C, Tables 4.2.6.8 and 6.1.1.4)
;

#==============================================================================
# ATOMIC COORDINATES AND THERMAL PARAMETERS

loop_
_atom_site_label
_atom_site_type_symbol
_atom_site_fract_x
_atom_site_fract_y
_atom_site_fract_z
_atom_site_U_iso_or_equiv
_atom_site_adp_type
_atom_site_occupancy
_atom_site_symmetry_multiplicity
_atom_site_calc_flag
_atom_site_refinement_flags
_atom_site_disorder_assembly
_atom_site_disorder_group
 O1 O 0.2007(3) 0.66100(5) 0.71783(15) 0.0602(4) Uani 1.0 2 d . . .
 H1O H 0.2719 0.6807 0.7042 0.0862 Uiso 1.0 2 calc R . .
 N1 N 0.4562(4) 0.71854(5) 0.7717(2) 0.0570(5) Uani 1.0 2 d . . .
 C1 C 0.3185(4) 0.67751(6) 0.9424(3) 0.0520(5) Uani 1.0 2 d . . .
 C2 C 0.1984(4) 0.65429(6) 0.8521(2) 0.0497(5) Uani 1.0 2 d . . .
 C3 C 0.0746(4) 0.62370(6) 0.9004(3) 0.0534(5) Uani 1.0 2 d . . .
 C4 C 0.0822(4) 0.61805(6) 1.0386(3) 0.0582(6) Uani 1.0 2 d . . .
 H4 H 0.0019 0.5976 1.0719 0.0699 Uiso 1.0 2 calc R . .
 C5 C 0.2007(4) 0.64059(6) 1.1319(3) 0.0563(6) Uani 1.0 2 d D . .
 C6 C 0.3173(5) 0.67041(6) 1.0806(3) 0.0569(6) Uani 1.0 2 d . . .
 H6 H 0.3982 0.6864 1.1403 0.0683 Uiso 1.0 2 calc R . .
 C7 C 0.4437(4) 0.71011(6) 0.8960(3) 0.0556(5) Uani 1.0 2 d . . .
 H7 H 0.5182 0.7255 0.9607 0.0667 Uiso 1.0 2 calc R . .
 C8 C -0.0585(5) 0.59757(7) 0.8034(3) 0.0667(7) Uani 1.0 2 d . . .
 C9 C -0.2247(6) 0.62137(10) 0.7211(3) 0.0822(9) Uani 1.0 2 d . . .
 H9A H -0.3014 0.6050 0.6560 0.0986 Uiso 1.0 2 calc R . .
 H9B H -0.1519 0.6416 0.6740 0.0986 Uiso 1.0 2 calc R . .
 H9C H -0.3264 0.6326 0.7810 0.0986 Uiso 1.0 2 calc R . .
 C10 C 0.0936(7) 0.57720(9) 0.7093(4) 0.0891(10) Uani 1.0 2 d . . .
 H10A H 0.1922 0.5609 0.7621 0.1070 Uiso 1.0 2 calc R . .
 H10B H 0.1751 0.5962 0.6615 0.1070 Uiso 1.0 2 calc R . .
 H10C H 0.0098 0.5617 0.6449 0.1070 Uiso 1.0 2 calc R . .
 C11 C -0.1797(8) 0.56678(11) 0.8784(4) 0.1062(13) Uani 1.0 2 d . . .
 H11A H -0.0772 0.5505 0.9284 0.1275 Uiso 1.0 2 calc R . .
 H11B H -0.2642 0.5513 0.8141 0.1275 Uiso 1.0 2 calc R . .
 H11C H -0.2749 0.5789 0.9404 0.1275 Uiso 1.0 2 calc R . .
 C12 C 0.1974(4) 0.63218(6) 1.2837(2) 0.0622(9) Uiso 0.771(4) 2 d PGDU A 1
 C13 C 0.3260(7) 0.66219(9) 1.3683(4) 0.0950(13) Uani 0.771(4) 2 d PGU A 1
 H13A H 0.3206 0.6558 1.4632 0.1140 Uiso 0.771(4) 2 calc PR A 1
 H13B H 0.2635 0.6874 1.3523 0.1140 Uiso 0.771(4) 2 calc PR A 1
 H13C H 0.4748 0.6623 1.3426 0.1140 Uiso 0.771(4) 2 calc PR A 1
 C14 C 0.2958(6) 0.59215(7) 1.3094(4) 0.0916(13) Uani 0.771(4) 2 d PGU A 1
 H14A H 0.2946 0.5862 1.4048 0.1099 Uiso 0.771(4) 2 calc PR A 1
 H14B H 0.4432 0.5919 1.2810 0.1099 Uiso 0.771(4) 2 calc PR A 1
 H14C H 0.2117 0.5731 1.2586 0.1099 Uiso 0.771(4) 2 calc PR A 1
 C15 C -0.0391(4) 0.63225(11) 1.3237(4) 0.0995(13) Uani 0.771(4) 2 d PGU A 1
 H15A H -0.0449 0.6267 1.4192 0.1193 Uiso 0.771(4) 2 calc PR A 1
 H15B H -0.1190 0.6128 1.2723 0.1193 Uiso 0.771(4) 2 calc PR A 1
 H15C H -0.1023 0.6573 1.3048 0.1193 Uiso 0.771(4) 2 calc PR A 1
 C12A C 0.1872(15) 0.6307(3) 1.2864(7) 0.089(3) Uiso 0.229(4) 2 d PGDU A 2
 C13A C 0.4230(15) 0.6295(4) 1.3419(14) 0.101(3) Uani 0.229(4) 2 d PGU A 2
 H13D H 0.4926 0.6537 1.3239 0.1213 Uiso 0.229(4) 2 calc PR A 2
 H13E H 0.4985 0.6089 1.2984 0.1213 Uiso 0.229(4) 2 calc PR A 2
 H13F H 0.4264 0.6250 1.4385 0.1213 Uiso 0.229(4) 2 calc PR A 2
 C14A C 0.077(2) 0.5922(3) 1.3150(13) 0.094(3) Uani 0.229(4) 2 d PGU A 2
 H14D H 0.1523 0.5716 1.2716 0.1129 Uiso 0.229(4) 2 calc PR A 2
 H14E H -0.0719 0.5930 1.2799 0.1129 Uiso 0.229(4) 2 calc PR A 2
 H14F H 0.0798 0.5878 1.4116 0.1129 Uiso 0.229(4) 2 calc PR A 2
 C15A C 0.067(2) 0.6635(3) 1.3551(11) 0.087(3) Uani 0.229(4) 2 d PGU A 2
 H15D H 0.1372 0.6877 1.3370 0.1039 Uiso 0.229(4) 2 calc PR A 2
 H15E H 0.0705 0.6590 1.4517 0.1039 Uiso 0.229(4) 2 calc PR A 2
 H15F H -0.0811 0.6643 1.3200 0.1039 Uiso 0.229(4) 2 calc PR A 2
 C16 C 0.5887(4) 0.75176(7) 0.7368(3) 0.0611(6) Uani 1.0 2 d . . .
 H16 H 0.6288 0.7663 0.8199 0.0733 Uiso 1.0 2 calc R . .
 C17 C 0.7929(5) 0.73721(9) 0.6744(4) 0.0847(9) Uani 1.0 2 d . . .
 H17A H 0.8760 0.7220 0.7402 0.1017 Uiso 1.0 2 calc R . .
 H17B H 0.8785 0.7589 0.6469 0.1017 Uiso 1.0 2 calc R . .
 H17C H 0.7541 0.7215 0.5963 0.1017 Uiso 1.0 2 calc R . .
 C18 C 0.4627(4) 0.77760(6) 0.6398(3) 0.0523(5) Uani 1.0 2 d . . .
 C19 C 0.3417(5) 0.76315(7) 0.5300(3) 0.0655(6) Uani 1.0 2 d . . .
 H19 H 0.3318 0.7365 0.5171 0.0786 Uiso 1.0 2 calc R . .
 C20 C 0.2359(5) 0.78756(9) 0.4397(3) 0.0731(7) Uani 1.0 2 d . . .
 H20 H 0.1541 0.7774 0.3659 0.0877 Uiso 1.0 2 calc R . .
 C21 C 0.2492(5) 0.82671(9) 0.4570(3) 0.0729(7) Uani 1.0 2 d . . .
 H21 H 0.1770 0.8433 0.3951 0.0875 Uiso 1.0 2 calc R . .
 C22 C 0.3673(5) 0.84140(8) 0.5641(3) 0.0731(7) Uani 1.0 2 d . . .
 H22 H 0.3771 0.8681 0.5762 0.0877 Uiso 1.0 2 calc R . .
 C23 C 0.4735(4) 0.81671(7) 0.6556(3) 0.0644(6) Uani 1.0 2 d . . .
 H23 H 0.5540 0.8270 0.7296 0.0773 Uiso 1.0 2 calc R . .
 O2 O 0.6909(3) 0.91666(4) 0.95058(15) 0.0573(4) Uani 1.0 2 d . . .
 H2O H 0.7656 0.8975 0.9697 0.0545 Uiso 1.0 2 calc R . .
 N2 N 0.9455(3) 0.85902(5) 0.91457(19) 0.0537(5) Uani 1.0 2 d . . .
 C24 C 0.8091(4) 0.89925(6) 0.7330(2) 0.0499(5) Uani 1.0 2 d . . .
 C25 C 0.6875(4) 0.92275(5) 0.8155(2) 0.0468(5) Uani 1.0 2 d . . .
 C26 C 0.5614(4) 0.95297(6) 0.7591(2) 0.0499(5) Uani 1.0 2 d . . .
 C27 C 0.5704(4) 0.95821(6) 0.6203(3) 0.0536(5) Uani 1.0 2 d . . .
 H27 H 0.4880 0.9783 0.5808 0.0644 Uiso 1.0 2 calc R . .
 C28 C 0.6923(4) 0.93595(6) 0.5355(3) 0.0556(6) Uani 1.0 2 d D . .
 C29 C 0.8107(4) 0.90640(6) 0.5951(3) 0.0549(5) Uani 1.0 2 d . . .
 H29 H 0.8946 0.8907 0.5411 0.0658 Uiso 1.0 2 calc R . .
 C30 C 0.9342(4) 0.86717(6) 0.7892(3) 0.0537(5) Uani 1.0 2 d . . .
 H30 H 1.0104 0.8517 0.7301 0.0644 Uiso 1.0 2 calc R . .
 C31 C 0.4307(4) 0.97947(6) 0.8477(3) 0.0597(6) Uani 1.0 2 d . . .
 C32 C 0.2727(5) 0.95683(8) 0.9302(3) 0.0744(7) Uani 1.0 2 d . . .
 H32A H 0.1757 0.9424 0.8699 0.0892 Uiso 1.0 2 calc R . .
 H32B H 0.1900 0.9744 0.9830 0.0892 Uiso 1.0 2 calc R . .
 H32C H 0.3521 0.9393 0.9901 0.0892 Uiso 1.0 2 calc R . .
 C33 C 0.5900(5) 1.00206(7) 0.9397(3) 0.0725(7) Uani 1.0 2 d . . .
 H33A H 0.6762 0.9843 0.9950 0.0870 Uiso 1.0 2 calc R . .
 H33B H 0.5110 1.0190 0.9973 0.0870 Uiso 1.0 2 calc R . .
 H33C H 0.6837 1.0172 0.8850 0.0870 Uiso 1.0 2 calc R . .
 C34 C 0.2971(6) 1.00861(9) 0.7614(4) 0.0849(9) Uani 1.0 2 d . . .
 H34A H 0.3925 1.0234 0.7067 0.1019 Uiso 1.0 2 calc R . .
 H34B H 0.2219 1.0258 0.8201 0.1019 Uiso 1.0 2 calc R . .
 H34C H 0.1930 0.9950 0.7032 0.1019 Uiso 1.0 2 calc R . .
 C35 C 0.6860(5) 0.94464(6) 0.3823(2) 0.0611(9) Uiso 0.755(5) 2 d PGDU B 1
 C36 C 0.5583(6) 0.98113(8) 0.3426(4) 0.0844(12) Uani 0.755(5) 2 d PGU B 1
 H36A H 0.6219 1.0031 0.3898 0.1013 Uiso 0.755(5) 2 calc PR B 1
 H36B H 0.4096 0.9782 0.3668 0.1013 Uiso 0.755(5) 2 calc PR B 1
 H36C H 0.5628 0.9851 0.2461 0.1013 Uiso 0.755(5) 2 calc PR B 1
 C37 C 0.5852(7) 0.90986(8) 0.3074(4) 0.0920(13) Uani 0.755(5) 2 d PGU B 1
 H37A H 0.4365 0.9069 0.3315 0.1104 Uiso 0.755(5) 2 calc PR B 1
 H37B H 0.6656 0.8869 0.3326 0.1104 Uiso 0.755(5) 2 calc PR B 1
 H37C H 0.5899 0.9139 0.2109 0.1104 Uiso 0.755(5) 2 calc PR B 1
 C38 C 0.9220(5) 0.94933(12) 0.3442(5) 0.1135(16) Uani 0.755(5) 2 d PGU B 1
 H38A H 0.9853 0.9713 0.3915 0.1362 Uiso 0.755(5) 2 calc PR B 1
 H38B H 0.9268 0.9534 0.2477 0.1362 Uiso 0.755(5) 2 calc PR B 1
 H38C H 1.0025 0.9264 0.3694 0.1362 Uiso 0.755(5) 2 calc PR B 1
 C35A C 0.7336(15) 0.9412(3) 0.3848(7) 0.078(3) Uiso 0.245(5) 2 d PGDU B 2
 C36A C 0.5036(15) 0.9368(4) 0.3214(12) 0.099(3) Uani 0.245(5) 2 d PGU B 2
 H36D H 0.5058 0.9408 0.2248 0.1191 Uiso 0.245(5) 2 calc PR B 2
 H36E H 0.4098 0.9557 0.3601 0.1191 Uiso 0.245(5) 2 calc PR B 2
 H36F H 0.4502 0.9113 0.3395 0.1191 Uiso 0.245(5) 2 calc PR B 2
 C37A C 0.886(2) 0.9132(3) 0.3166(12) 0.105(4) Uani 0.245(5) 2 d PGU B 2.
 H37D H 0.8933 0.9198 0.2220 0.1255 Uiso 0.245(5) 2 calc PR B 2
 H37E H 0.8311 0.8872 0.3243 0.1255 Uiso 0.245(5) 2 calc PR B 2
 H37F H 1.0286 0.9147 0.3603 0.1255 Uiso 0.245(5) 2 calc PR B 2
 C38A C 0.812(2) 0.9826(3) 0.3650(12) 0.094(3) Uani 0.245(5) 2 d PGU B 2
 H38D H 0.8308 0.9872 0.2699 0.1123 Uiso 0.245(5) 2 calc PR B 2
 H38E H 0.9487 0.9863 0.4150 0.1123 Uiso 0.245(5) 2 calc PR B 2
 H38F H 0.7063 1.0004 0.3976 0.1123 Uiso 0.245(5) 2 calc PR B 2
 C39 C 1.0817(4) 0.82674(7) 0.9595(3) 0.0602(6) Uani 1.0 2 d . . .
 H39 H 1.1226 0.8117 0.8800 0.0723 Uiso 1.0 2 calc R . .
 C40 C 1.2845(5) 0.84254(11) 1.0318(4) 0.0956(11) Uani 1.0 2 d . . .
 H40A H 1.3641 0.8579 0.9694 0.1148 Uiso 1.0 2 calc R . .
 H40B H 1.3740 0.8214 1.0650 0.1148 Uiso 1.0 2 calc R . .
 H40C H 1.2447 0.8584 1.1069 0.1148 Uiso 1.0 2 calc R . .
 C41 C 0.9614(4) 0.80086(6) 1.0538(3) 0.0534(5) Uani 1.0 2 d . . .
 C42 C 0.8311(4) 0.81537(7) 1.1509(3) 0.0617(6) Uani 1.0 2 d . . .
 H42 H 0.8116 0.8420 1.1576 0.0740 Uiso 1.0 2 calc R . .
 C43 C 0.7290(5) 0.79121(9) 1.2381(3) 0.0717(7) Uani 1.0 2 d . . .
 H43 H 0.6401 0.8015 1.3030 0.0861 Uiso 1.0 2 calc R . .
 C44 C 0.7571(5) 0.75236(9) 1.2302(3) 0.0742(8) Uani 1.0 2 d . . .
 H44 H 0.6887 0.7359 1.2899 0.0890 Uiso 1.0 2 calc R . .
 C45 C 0.8859(6) 0.73752(8) 1.1342(4) 0.0785(8) Uani 1.0 2 d . . .
 H45 H 0.9053 0.7108 1.1282 0.0941 Uiso 1.0 2 calc R . .
 C46 C 0.9867(5) 0.76144(7) 1.0468(3) 0.0677(7) Uani 1.0 2 d . . .
 H46 H 1.0739 0.7509 0.9814 0.0812 Uiso 1.0 2 calc R . .


loop_
_atom_site_aniso_label
_atom_site_aniso_U_11
_atom_site_aniso_U_22
_atom_site_aniso_U_33
_atom_site_aniso_U_12
_atom_site_aniso_U_13
_atom_site_aniso_U_23
 O1 0.0748(11) 0.0632(10) 0.0433(8) -0.0138(8) 0.0093(7) 0.0064(7)
 N1 0.0589(11) 0.0577(11) 0.0551(11) -0.0090(8) 0.0091(9) 0.0074(8)
 C1 0.0585(13) 0.0486(11) 0.0498(12) -0.0001(9) 0.0131(10) 0.0018(9)
 C2 0.0593(13) 0.0488(11) 0.0421(11) 0.0024(9) 0.0122(9) 0.0046(8)
 C3 0.0648(14) 0.0474(11) 0.0486(12) -0.0045(9) 0.0096(10) 0.0003(9)
 C4 0.0739(15) 0.0505(11) 0.0518(13) -0.0065(10) 0.0182(11) 0.0055(9)
 C5 0.0732(15) 0.0497(11) 0.0471(12) 0.0033(10) 0.0138(11) 0.0008(9)
 C6 0.0688(14) 0.0551(12) 0.0473(12) -0.0010(10) 0.0068(10) -0.0056(9)
 C7 0.0555(13) 0.0557(12) 0.0560(13) -0.0055(9) 0.0065(10) 0.0005(10)
 C8 0.0845(18) 0.0603(13) 0.0555(14) -0.0207(12) 0.0060(12) 0.0022(10)
 C9 0.0768(18) 0.094(2) 0.0747(19) -0.0239(15) -0.0037(14) 0.0041(15)
 C10 0.132(3) 0.0647(16) 0.0712(18) -0.0078(17) 0.0055(18) -0.0162(13)
 C11 0.148(4) 0.097(3) 0.0739(19) -0.068(3) 0.006(2) 0.0052(17)
 C13 0.151(4) 0.088(3) 0.0464(18) -0.017(3) 0.016(2) -0.0035(16)
 C14 0.138(4) 0.077(3) 0.060(2) 0.029(3) 0.012(2) 0.0183(16)
 C15 0.122(3) 0.111(3) 0.070(3) 0.012(3) 0.043(3) 0.021(2)
 C13A 0.122(5) 0.108(5) 0.076(5) 0.027(5) 0.030(5) 0.038(5)
 C14A 0.119(5) 0.094(5) 0.071(5) 0.025(5) 0.030(5) 0.034(5)
 C15A 0.118(5) 0.090(5) 0.055(5) 0.027(5) 0.036(5) 0.023(4)
 C16 0.0563(13) 0.0621(13) 0.0653(14) -0.0135(10) 0.0060(11) 0.0101(11)
 C17 0.0618(16) 0.0889(19) 0.105(3) 0.0028(15) 0.0214(15) 0.0276(17)
 C18 0.0437(11) 0.0618(12) 0.0522(12) -0.0121(9) 0.0120(9) 0.0056(9)
 C19 0.0679(15) 0.0647(14) 0.0639(15) -0.0133(11) 0.0027(12) -0.0036(11)
 C20 0.0633(15) 0.095(2) 0.0607(15) -0.0100(13) -0.0015(12) 0.0040(13)
 C21 0.0590(15) 0.0882(19) 0.0726(18) 0.0055(13) 0.0134(13) 0.0201(14)
 C22 0.0760(17) 0.0602(14) 0.084(2) -0.0037(12) 0.0155(15) 0.0118(13)
 C23 0.0655(15) 0.0629(13) 0.0650(15) -0.0166(11) 0.0056(12) 0.0017(11)
 O2 0.0705(10) 0.0599(9) 0.0416(8) 0.0136(8) 0.0043(7) 0.0070(6)
 N2 0.0532(11) 0.0540(10) 0.0538(11) 0.0032(8) 0.0011(8) 0.0073(8)
 C24 0.0523(12) 0.0492(11) 0.0479(11) -0.0016(9) 0.0008(9) 0.0020(8)
 C25 0.0530(12) 0.0464(10) 0.0408(11) -0.0016(8) 0.0004(9) 0.0016(8)
 C26 0.0563(12) 0.0455(10) 0.0476(11) -0.0018(9) 0.0005(9) 0.0026(8)
 C27 0.0631(14) 0.0473(11) 0.0499(12) -0.0007(9) -0.0036(10) 0.0077(9)
 C28 0.0646(14) 0.0541(12) 0.0483(12) -0.0068(10) 0.0040(10) 0.0025(9)
 C29 0.0612(13) 0.0579(12) 0.0463(12) -0.0014(10) 0.0111(10) -0.0016(9)
 C30 0.0521(13) 0.0550(12) 0.0543(13) 0.0034(9) 0.0058(9) -0.0013(9)
 C31 0.0704(15) 0.0542(12) 0.0541(13) 0.0127(11) 0.0017(11) 0.0013(10)
 C32 0.0699(16) 0.0773(17) 0.0772(18) 0.0110(13) 0.0167(13) 0.0019(13)
 C33 0.095(2) 0.0567(13) 0.0657(16) 0.0029(13) 0.0032(14) -0.0093(11)
 C34 0.105(3) 0.0729(17) 0.0758(19) 0.0379(16) -0.0045(17) -0.0009(14)
 C36 0.111(3) 0.091(3) 0.052(2) 0.018(3) 0.0119(19) 0.0249(17)
 C37 0.142(4) 0.094(3) 0.0407(17) 0.006(3) 0.011(2) 0.0023(17)
 C38 0.096(3) 0.159(4) 0.089(3) 0.017(3) 0.038(3) 0.047(3)
 C36A 0.119(5) 0.114(6) 0.068(5) 0.015(5) 0.027(5) 0.032(5)
 C37A 0.130(7) 0.116(6) 0.071(6) 0.038(6) 0.040(6) 0.029(6)
 C38A 0.111(5) 0.095(5) 0.078(5) 0.018(5) 0.043(5) 0.038(4)
 C39 0.0497(13) 0.0651(14) 0.0658(15) 0.0103(10) 0.0011(10) 0.0105(11)
 C40 0.0552(15) 0.107(3) 0.123(3) -0.0130(15) -0.0191(16) 0.049(2)
 C41 0.0438(11) 0.0553(11) 0.0602(13) 0.0074(9) -0.0062(9) 0.0074(10)
 C42 0.0555(13) 0.0608(13) 0.0687(15) 0.0111(10) 0.0022(11) 0.0071(11)
 C43 0.0587(14) 0.090(2) 0.0668(16) 0.0104(13) 0.0081(12) 0.0154(13)
 C44 0.0620(16) 0.0818(17) 0.0778(18) -0.0117(13) -0.0076(14) 0.0253(14)
 C45 0.086(2) 0.0554(14) 0.093(2) -0.0019(13) -0.0100(16) 0.0135(13)
 C46 0.0704(16) 0.0572(14) 0.0749(16) 0.0127(11) -0.0025(13) 0.0016(12)

#==============================================================================
_computing_data_collection            'PROCESS-AUTO (Rigaku, 1998)'
_computing_cell_refinement            'PROCESS-AUTO (Rigaku, 1998)'
_computing_data_reduction         'CrystalStructure (Rigaku, 2000-2010)'
_computing_structure_solution         'SHELXS97 (Sheldrick, 1997)'
_computing_structure_refinement       'SHELXL97 (Sheldrick, 1997)' 
_computing_publication_material   'CrystalStructure (Rigaku, 2000-2010)'
_computing_molecular_graphics         'ORTEP (Johnson, 1976)'

#==============================================================================
# MOLECULAR GEOMETRY

_geom_special_details
;
    ENTER SPECIAL DETAILS OF THE MOLECULAR GEOMETRY
;

loop_
_geom_bond_atom_site_label_1
_geom_bond_atom_site_label_2
_geom_bond_distance
_geom_bond_publ_flag
_geom_bond_site_symmetry_1
_geom_bond_site_symmetry_2
O1 C2 1.354(3) yes . .
N1 C7 1.275(3) yes . .
N1 C16 1.470(3) yes . .
C1 C2 1.395(3) yes . .
C1 C6 1.395(4) yes . .
C1 C7 1.463(4) yes . .
C2 C3 1.411(3) yes . .
C3 C4 1.384(4) yes . .
C3 C8 1.537(4) yes . .
C4 C5 1.397(4) yes . .
C5 C6 1.378(4) yes . .
C5 C12 1.535(3) yes . .
C5 C12A 1.577(7) yes . .
C8 C9 1.529(5) yes . .
C8 C10 1.533(5) yes . .
C8 C11 1.525(5) yes . .
C12 C13 1.540 yes . .
C12 C14 1.539 yes . .
C12 C15 1.539 yes . .
C12A C13A 1.540 yes . .
C12A C14A 1.539 yes . .
C12A C15A 1.539 yes . .
C16 C17 1.524(4) yes . .
C16 C18 1.509(4) yes . .
C18 C19 1.388(4) yes . .
C18 C23 1.373(4) yes . .
C19 C20 1.378(4) yes . .
C20 C21 1.377(5) yes . .
C21 C22 1.361(4) yes . .
C22 C23 1.394(4) yes . .
O2 C25 1.356(3) yes . .
N2 C30 1.275(3) yes . .
N2 C39 1.464(3) yes . .
C24 C25 1.403(3) yes . .
C24 C29 1.393(3) yes . .
C24 C30 1.457(3) yes . .
C25 C26 1.412(3) yes . .
C26 C27 1.394(3) yes . .
C26 C31 1.534(4) yes . .
C27 C28 1.394(4) yes . .
C28 C29 1.381(3) yes . .
C28 C35 1.548(3) yes . .
C28 C35A 1.540(7) yes . .
C31 C32 1.527(4) yes . .
C31 C33 1.531(4) yes . .
C31 C34 1.544(4) yes . .
C35 C36 1.540 yes . .
C35 C37 1.539 yes . .
C35 C38 1.539 yes . .
C35A C36A 1.540 yes . .
C35A C37A 1.539 yes . .
C35A C38A 1.539 yes . .
C39 C40 1.521(4) yes . .
C39 C41 1.521(4) yes . .
C41 C42 1.383(4) yes . .
C41 C46 1.384(4) yes . .
C42 C43 1.383(4) yes . .
C43 C44 1.367(5) yes . .
C44 C45 1.374(5) yes . .
C45 C46 1.374(5) yes . .

loop_
_geom_angle_atom_site_label_1
_geom_angle_atom_site_label_2
_geom_angle_atom_site_label_3
_geom_angle
_geom_angle_publ_flag
_geom_angle_site_symmetry_1
_geom_angle_site_symmetry_2
_geom_angle_site_symmetry_3
C7 N1 C16 118.0(2) yes . . .
C2 C1 C6 120.1(2) yes . . .
C2 C1 C7 121.6(2) yes . . .
C6 C1 C7 118.4(2) yes . . .
O1 C2 C1 120.1(2) yes . . .
O1 C2 C3 119.74(19) yes . . .
C1 C2 C3 120.18(19) yes . . .
C2 C3 C4 116.8(2) yes . . .
C2 C3 C8 121.3(2) yes . . .
C4 C3 C8 121.9(2) yes . . .
C3 C4 C5 124.7(2) yes . . .
C4 C5 C6 116.6(2) yes . . .
C4 C5 C12 120.8(2) yes . . .
C4 C5 C12A 118.1(4) yes . . .
C6 C5 C12 122.6(2) yes . . .
C6 C5 C12A 125.3(4) yes . . .
C1 C6 C5 121.7(2) yes . . .
N1 C7 C1 122.8(2) yes . . .
C3 C8 C9 110.0(3) yes . . .
C3 C8 C10 109.1(3) yes . . .
C3 C8 C11 111.9(3) yes . . .
C9 C8 C10 110.2(3) yes . . .
C9 C8 C11 107.8(3) yes . . .
C10 C8 C11 107.7(3) yes . . .
C5 C12 C13 112.0(2) yes . . .
C5 C12 C14 108.2(2) yes . . .
C5 C12 C15 108.1(3) yes . . .
C13 C12 C14 109.5 yes . . .
C13 C12 C15 109.5 yes . . .
C14 C12 C15 109.5 yes . . .
C5 C12A C13A 105.1(7) yes . . .
C5 C12A C14A 114.5(7) yes . . .
C5 C12A C15A 108.6(7) yes . . .
C13A C12A C14A 109.5 yes . . .
C13A C12A C15A 109.5 yes . . .
C14A C12A C15A 109.6 yes . . .
N1 C16 C17 108.6(2) yes . . .
N1 C16 C18 109.96(19) yes . . .
C17 C16 C18 110.7(3) yes . . .
C16 C18 C19 121.9(2) yes . . .
C16 C18 C23 119.9(2) yes . . .
C19 C18 C23 118.1(2) yes . . .
C18 C19 C20 120.6(3) yes . . .
C19 C20 C21 120.4(3) yes . . .
C20 C21 C22 119.8(3) yes . . .
C21 C22 C23 119.8(3) yes . . .
C18 C23 C22 121.3(3) yes . . .
C30 N2 C39 118.2(2) yes . . .
C25 C24 C29 119.9(2) yes . . .
C25 C24 C30 121.07(19) yes . . .
C29 C24 C30 119.0(2) yes . . .
O2 C25 C24 120.15(18) yes . . .
O2 C25 C26 119.38(18) yes . . .
C24 C25 C26 120.47(19) yes . . .
C25 C26 C27 116.2(2) yes . . .
C25 C26 C31 121.33(19) yes . . .
C27 C26 C31 122.37(19) yes . . .
C26 C27 C28 124.9(2) yes . . .
C27 C28 C29 116.7(2) yes . . .
C27 C28 C35 119.7(2) yes . . .
C27 C28 C35A 129.8(4) yes . . .
C29 C28 C35 123.6(2) yes . . .
C29 C28 C35A 113.2(4) yes . . .
C24 C29 C28 121.7(2) yes . . .
N2 C30 C24 123.2(2) yes . . .
C26 C31 C32 111.57(19) yes . . .
C26 C31 C33 107.9(2) yes . . .
C26 C31 C34 111.3(2) yes . . .
C32 C31 C33 111.0(3) yes . . .
C32 C31 C34 107.2(3) yes . . .
C33 C31 C34 107.9(2) yes . . .
C28 C35 C36 113.7(2) yes . . .
C28 C35 C37 108.1(2) yes . . .
C28 C35 C38 106.4(3) yes . . .
C36 C35 C37 109.5 yes . . .
C36 C35 C38 109.5 yes . . .
C37 C35 C38 109.5 yes . . .
C28 C35A C36A 101.0(7) yes . . .
C28 C35A C37A 119.1(7) yes . . .
C28 C35A C38A 107.7(6) yes . . .
C36A C35A C37A 109.5 yes . . .
C36A C35A C38A 109.5 yes . . .
C37A C35A C38A 109.5 yes . . .
N2 C39 C40 108.6(3) yes . . .
N2 C39 C41 110.44(18) yes . . .
C40 C39 C41 110.1(3) yes . . .
C39 C41 C42 122.2(2) yes . . .
C39 C41 C46 119.8(3) yes . . .
C42 C41 C46 118.0(3) yes . . .
C41 C42 C43 121.0(3) yes . . .
C42 C43 C44 120.2(3) yes . . .
C43 C44 C45 119.5(3) yes . . .
C44 C45 C46 120.5(3) yes . . .
C41 C46 C45 120.9(3) yes . . .

#==============================================================================
#     End of CIF
#==============================================================================
